# Supplementary material
Source: PubMed Central journal article supplement (PMC6449049)
Supplement: NIHMS1020192-supplement-Suppl.pdf [file NIHMS1020192-supplement-Suppl.pdf]

## Supporting Information

### Catalytic Asymmetric Mannich Reaction of $\alpha$ -Fluoronitriles with Ketimines: Enantioselective and Diastereodivergent Construction of Vicinal Tetrasubstituted Stereocenters

Ransheng Ding, Zeus A. De los Santos and Christian Wolf\*  
Department of Chemistry, Georgetown University, Washington DC 20057, USA  
cw27@georgetown.edu

#### Table of Contents

|                                                                                                                 |      |
|-----------------------------------------------------------------------------------------------------------------|------|
| 1. General Information.....                                                                                     | S2   |
| 2. Optimization Studies.....                                                                                    | S3   |
| 2.1 Screening of copper sources, ligands and bases.....                                                         | S3   |
| 2.2 Screening of solvents .....                                                                                 | S5   |
| 3. Synthetic Procedures and Compound Characterization.....                                                      | S5   |
| 3.1 Synthesis of $\alpha$ -fluoro arylacetoneitriles <b>1a-1l</b> .....                                         | S5   |
| 3.2 Synthesis of ketimines.....                                                                                 | S8   |
| 3.3 Procedures for the addition of $\alpha$ -fluoro arylacetoneitriles <b>1</b> to ketimines <b>2</b> .....     | S8   |
| 3.4 Reduction of an $\alpha$ -fluoro $\beta$ -aminonitrile to an $\beta$ -fluoro $\alpha,\gamma$ -diamine ..... | S29  |
| 3.5 Partial nitrile hydrolysis .....                                                                            | S30  |
| 3.6 Oxindole lactam ring opening .....                                                                          | S31  |
| 3.7 Deprotection of <b>3ab</b> .....                                                                            | S32  |
| 4. Mechanistic Studies .....                                                                                    | S33  |
| 5. $^1\text{H}$ , $^{13}\text{C}$ , $^{19}\text{F}$ NMR Spectra.....                                            | S36  |
| 6. HPLC Chromatograms.....                                                                                      | S87  |
| 7. Crystallographic Data .....                                                                                  | S113 |
| 8. References.....                                                                                              | S117 |

## 1. General Information

All commercially available reagents and solvents were used without further purification unless noted otherwise. The solvents were stored over 4Å molecular sieves prior to use. Reaction products were purified by column chromatography on silica gel (particle size 32-63 μm) unless stated otherwise. NMR spectra were obtained at 400 MHz (<sup>1</sup>H NMR), 100 MHz (<sup>13</sup>C NMR), and 376 MHz (<sup>19</sup>F NMR) in CDCl<sub>3</sub>. Chemical shifts are reported in ppm relative to tetramethylsilane. The reaction products were first prepared in racemic form to develop a chiral HPLC method for ee analysis. The isolated asymmetric reaction products were then analyzed accordingly.

## 2. Optimization Studies

### 2.1 Screening of copper sources, ligands and bases

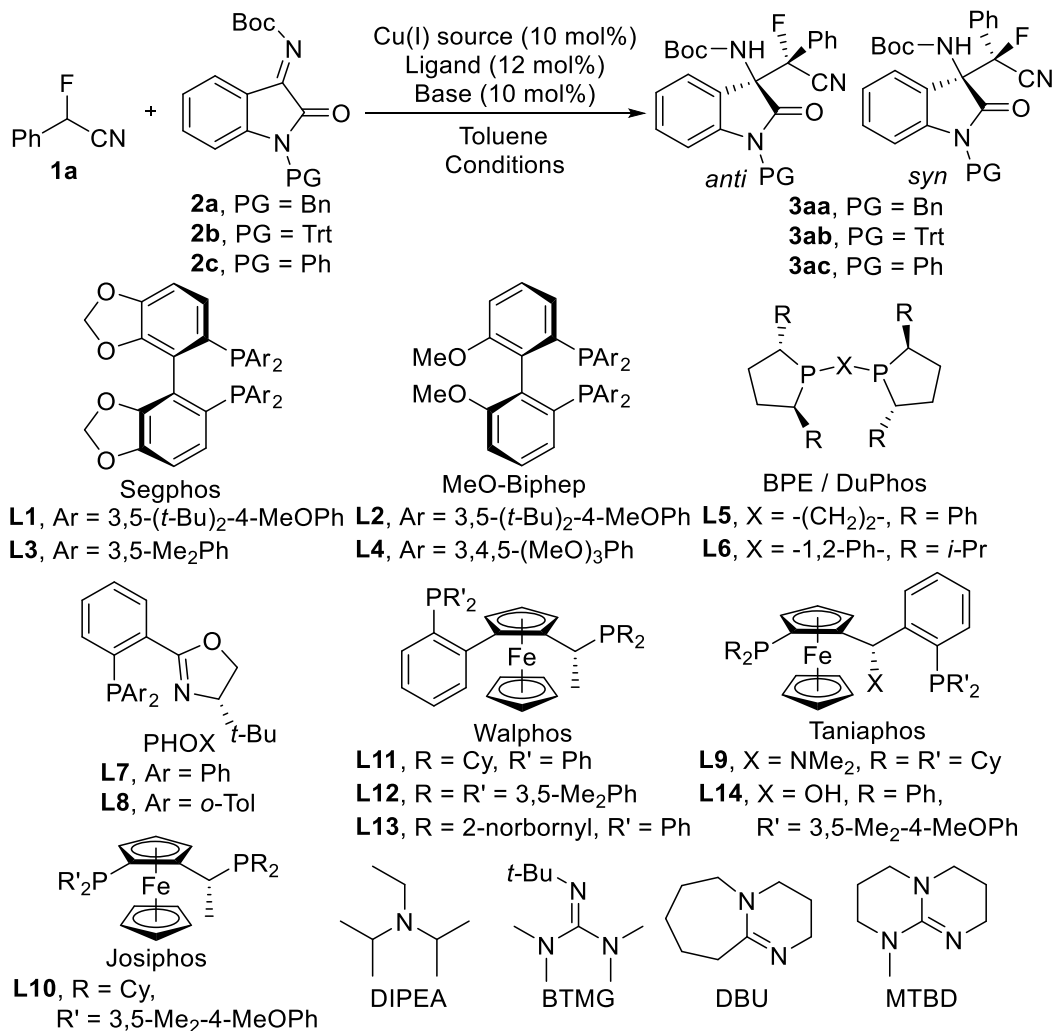

| Entry | Cu(I) source                          | Ligand | 2  | Base, Conditions                 | Yield (%) | dr <sup>a</sup> ( <i>anti</i> / <i>syn</i> ) | ee <sup>b</sup> (%) |
|-------|---------------------------------------|--------|----|----------------------------------|-----------|----------------------------------------------|---------------------|
| 1     | CuOAc                                 | L1     | 2a | 25 °C, 24 h                      | 0         | -                                            | -                   |
| 2     | CuO <sup>t</sup> Bu                   | L1     | 2a | 25 °C, 3 h                       | 95        | 1.3:1                                        | 50                  |
| 3     | Cu(PhMe) <sub>0.5</sub> OTf           | L1     | 2a | DIPEA <sup>c</sup> , 25 °C, 24 h | 91        | 1.7:1                                        | 41                  |
| 4     | CuO <sup>t</sup> Bu                   | L1     | 2b | 25 °C, 3 h                       | 89        | 6.0:1                                        | 82                  |
| 5     | Cu(PhMe) <sub>0.5</sub> OTf           | L1     | 2b | DIPEA <sup>c</sup> , 25 °C, 24 h | 85        | 5.2:1                                        | 80                  |
| 6     | Cu(PhMe) <sub>0.5</sub> OTf           | L2     | 2b | DIPEA <sup>c</sup> , 25 °C, 24 h | 74        | 4.6:1                                        | 75                  |
| 7     | Cu(PhMe) <sub>0.5</sub> OTf           | L1     | 2b | BTMG, 25 °C, 1 h                 | 98        | 5.8:1                                        | 83                  |
| 8     | Cu(MeCN) <sub>4</sub> PF <sub>6</sub> | L1     | 2b | BTMG, 25 °C, 1 h                 | 98        | 6.7:1                                        | 83                  |

|                 |                                       |                            |           |                    |    |        |     |
|-----------------|---------------------------------------|----------------------------|-----------|--------------------|----|--------|-----|
| 9               | Cu(MeCN) <sub>4</sub> PF <sub>6</sub> | <b>L1</b>                  | <b>2b</b> | DBU, 25 °C, 1 h    | 99 | 6.6:1  | 73  |
| 10              | Cu(MeCN) <sub>4</sub> PF <sub>6</sub> | <b>L1</b>                  | <b>2b</b> | MTBD, 25 °C, 1 h   | 99 | 5.8:1  | 83  |
| 11              | Cu(MeCN) <sub>4</sub> PF <sub>6</sub> | <b>L3</b>                  | <b>2b</b> | BTMG, 25 °C, 1 h   | 99 | 2.0:1  | 26  |
| 12              | Cu(MeCN) <sub>4</sub> PF <sub>6</sub> | <b>L4</b>                  | <b>2b</b> | BTMG, 25 °C, 1 h   | 99 | 4.0:1  | 79  |
| 13              | Cu(MeCN) <sub>4</sub> PF <sub>6</sub> | <b>L5</b>                  | <b>2b</b> | BTMG, 25 °C, 1 h   | 99 | 1.5:1  | 50  |
| 14              | Cu(MeCN) <sub>4</sub> PF <sub>6</sub> | <b>L6</b>                  | <b>2b</b> | BTMG, 25 °C, 1 h   | 99 | 1.3:1  | 31  |
| 15              | Cu(MeCN) <sub>4</sub> PF <sub>6</sub> | <b>L7</b>                  | <b>2b</b> | BTMG, 25 °C, 1 h   | 99 | 1.3:1  | 40  |
| 16              | Cu(MeCN) <sub>4</sub> PF <sub>6</sub> | <b>L8</b>                  | <b>2b</b> | BTMG, 25 °C, 1 h   | 99 | 1.1:1  | 47  |
| 17              | Cu(MeCN) <sub>4</sub> PF <sub>6</sub> | <b>L1</b>                  | <b>2b</b> | BTMG, -35 °C, 24 h | 95 | 12.3:1 | 90  |
| 18 <sup>d</sup> | Cu(MeCN) <sub>4</sub> PF <sub>6</sub> | <b>ent-L9<sup>c</sup></b>  | <b>2b</b> | BTMG, 25 °C, 1 h   | 97 | 1:1.6  | 3   |
| 19 <sup>d</sup> | Cu(MeCN) <sub>4</sub> PF <sub>6</sub> | <b>ent-L9<sup>c</sup></b>  | <b>2a</b> | BTMG, 25 °C, 1 h   | 99 | 1:5.7  | 31  |
| 20 <sup>d</sup> | Cu(MeCN) <sub>4</sub> PF <sub>6</sub> | <b>L10</b>                 | <b>2a</b> | BTMG, -35 °C, 24 h | 75 | 1:2.5  | 4   |
| 21 <sup>d</sup> | Cu(MeCN) <sub>4</sub> PF <sub>6</sub> | <b>L11</b>                 | <b>2a</b> | BTMG, -35 °C, 24 h | 99 | 1:7.3  | 19  |
| 22 <sup>d</sup> | Cu(MeCN) <sub>4</sub> PF <sub>6</sub> | <b>L12</b>                 | <b>2a</b> | BTMG, -35 °C, 24 h | 99 | 1:5.6  | 60  |
| 23 <sup>d</sup> | Cu(MeCN) <sub>4</sub> PF <sub>6</sub> | <b>ent-L13<sup>c</sup></b> | <b>2a</b> | BTMG, -35 °C, 24 h | 99 | 1:13.4 | -70 |
| 24 <sup>d</sup> | Cu(MeCN) <sub>4</sub> PF <sub>6</sub> | <b>ent-L13<sup>c</sup></b> | <b>2c</b> | BTMG, -35 °C, 24 h | 98 | 1:8.7  | -75 |
| 25 <sup>d</sup> | Cu(MeCN) <sub>4</sub> PF <sub>6</sub> | <b>L14</b>                 | <b>2a</b> | BTMG, -35 °C, 48 h | 94 | 1:5.7  | 80  |
| 26 <sup>d</sup> | Cu(MeCN) <sub>4</sub> PF <sub>6</sub> | <b>L14</b>                 | <b>2c</b> | BTMG, -35 °C, 72 h | 94 | 1:3.0  | 98  |

Reaction condition: **1a** (0.055 mmol), **2** (0.050 mmol), Cu(I) source (0.005 mmol), ligand (0.006 mmol) and base in 0.3 mL toluene. <sup>a</sup> Determined by <sup>19</sup>F NMR analysis of the reaction mixture. <sup>b</sup> Determined by chiral HPLC analysis. The values correspond to the major diastereomer, the “-” sign indicates the reversion of the enantioselectivity. <sup>c</sup> The base loading was 80 mol%. <sup>d</sup> The loading of Cu(I) source, ligand, and base was reduced by half. <sup>e</sup> The enantiomer of the drawn ligand structure was used.

## 2.2 Screening of solvents

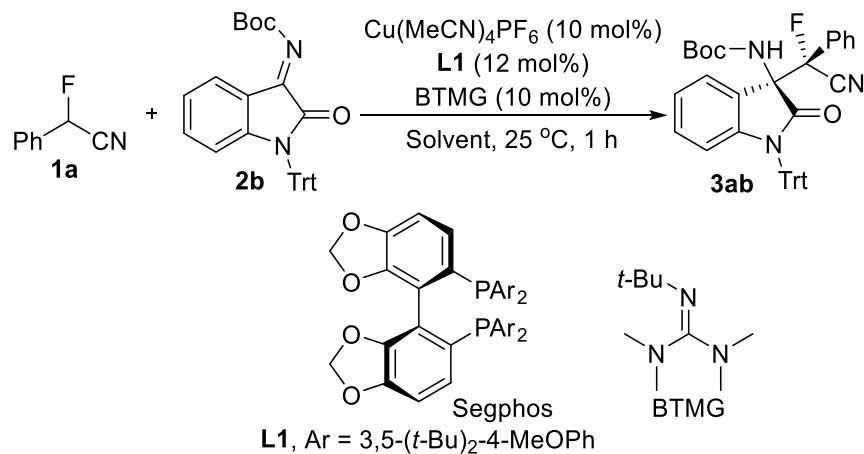

| Entry | Solvent           | Yield (%) | dr <sup>a</sup> ( <i>anti</i> / <i>syn</i> ) | ee <sup>b</sup> (%) |
|-------|-------------------|-----------|----------------------------------------------|---------------------|
| 1     | Toluene           | 99        | 6.7:1                                        | 83                  |
| 2     | Xylene            | 96        | 6.5:1                                        | 83                  |
| 3     | PhCF <sub>3</sub> | 99        | 5.6:1                                        | 80                  |
| 4     | MTBE              | 97        | 5.1:1                                        | 83                  |
| 5     | CHCl <sub>3</sub> | 20        | 5.8:1                                        | n. d.               |

Reaction condition: **1a** (0.055 mmol), **2b** (0.050 mmol),  $\text{Cu}(\text{MeCN})_4\text{PF}_6$  (0.005 mmol), **L1** (0.006 mmol) and BTMG (0.005 mmol) in 0.3 mL solvent. <sup>a</sup>Determined by <sup>19</sup>F NMR analysis.

<sup>b</sup>Determined by chiral HPLC analysis.

## 3. Synthetic Procedures and Compound Characterization

### 3.1 Synthesis of $\alpha$ -fluoro arylacetonitriles **1a-1l**

The  $\alpha$ -fluoro arylacetonitriles were prepared *via* a two-step synthesis including cyanide addition and deoxyfluorination from aryl aldehydes using literature procedures.<sup>1</sup> Compounds **1f-1j**, and **1l** have not been reported previously.

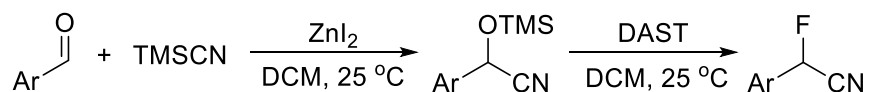

Methyl 4-(cyanofluoromethyl)benzoate (**1f**)

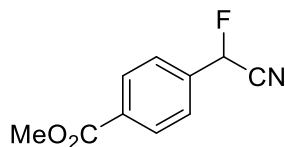

Compound **1f** was synthesized from methyl 4-formylbenzoate in 53% overall yield as a white solid, Mp 43.4-47.1 °C. <sup>1</sup>H NMR (400 MHz, CDCl<sub>3</sub>) δ = 3.96 (s, 3H), 6.13 (d, *J* = 46.7 Hz, 1H), 7.63 (dd, *J* = 8.3, 1.7 Hz, 2H), 8.16 (dd, *J* = 8.3, 1.7 Hz, 2H). <sup>13</sup>C NMR (100 MHz, CDCl<sub>3</sub>) δ = 52.6, 79.7 (d, *J*<sub>C-F</sub> = 183.3 Hz), 114.9 (d, *J*<sub>C-F</sub> = 32.6 Hz), 127.3 (d, *J*<sub>C-F</sub> = 4.6 Hz), 130.6 (d, *J*<sub>C-F</sub> = 1.2 Hz), 132.9 (d, *J*<sub>C-F</sub> = 2.9 Hz), 135.7 (d, *J*<sub>C-F</sub> = 20.4 Hz), 166.0 (d, *J*<sub>C-F</sub> = 1.0 Hz). <sup>19</sup>F NMR (376 MHz, CDCl<sub>3</sub>) δ = -172.55 (d, *J* = 46.1 Hz). Anal. Calcd. for C<sub>10</sub>H<sub>8</sub>FNO<sub>2</sub>: C, 62.18; H, 4.17; N, 7.25. Found: C, 62.14; H, 4.21; N, 7.28.

2-Fluoro-2-(3-nitrophenyl)acetonitrile (**1g**)

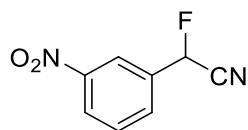

Compound **1g** was synthesized from 3-nitrobenzaldehyde in 42% overall yield as a yellow oil. <sup>1</sup>H NMR (400 MHz, CDCl<sub>3</sub>) δ = 6.21 (d, *J* = 46.4 Hz, 1H), 7.74 (ddd, *J* = 7.5, 7.5, 0.7 Hz, 1H), 7.92 (dd, *J* = 7.8, 1.3 Hz, 1H), 8.39 (ddd, *J* = 8.3, 2.6, 1.2 Hz, 1H), 8.43 (dd, *J* = 1.9, 1.9 Hz, 1H). <sup>13</sup>C NMR (100 MHz, CDCl<sub>3</sub>) δ = 79.0 (d, *J*<sub>C-F</sub> = 184.9 Hz), 114.4 (d, *J*<sub>C-F</sub> = 32.6 Hz), 122.5 (d, *J*<sub>C-F</sub> = 5.2 Hz), 126.1 (d, *J*<sub>C-F</sub> = 2.4 Hz), 130.9, 132.9 (d, *J*<sub>C-F</sub> = 4.3 Hz), 133.4 (d, *J*<sub>C-F</sub> = 21.5 Hz), 148.8. <sup>19</sup>F NMR (376 MHz, CDCl<sub>3</sub>) δ = -172.84 (d, *J* = 46.4 Hz). Anal. Calcd. for C<sub>8</sub>H<sub>5</sub>FN<sub>2</sub>O<sub>2</sub>: C, 53.34; H, 2.80; N, 15.55. Found: C, 53.32; H, 2.80; N, 15.53.

3-(Cyanofluoromethyl)benzonitrile (**1h**)

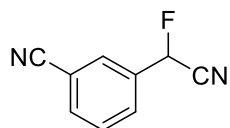

Compound **1h** was synthesized from 3-cyanobenzaldehyde in 47% overall yield as a yellow oil.  $^1\text{H}$  NMR (400 MHz,  $\text{CDCl}_3$ )  $\delta$  = 6.12 (d,  $J$  = 46.5 Hz, 1H), 7.67 (dd,  $J$  = 7.7, 7.7 Hz, 1H), 7.84 – 7.79 (m, 2H), 7.85 (d,  $J$  = 1.7 Hz, 1H).  $^{13}\text{C}$  NMR (100 MHz,  $\text{CDCl}_3$ )  $\delta$  = 79.1 (d,  $J_{\text{C-F}}$  = 184.5 Hz), 114.1, 114.4 (d,  $J_{\text{C-F}}$  = 32.5 Hz), 117.5, 130.6 (d,  $J_{\text{C-F}}$  = 0.8 Hz), 130.8 (d,  $J_{\text{C-F}}$  = 4.8 Hz), 131.4 (d,  $J_{\text{C-F}}$  = 4.3 Hz), 133.1 (d,  $J_{\text{C-F}}$  = 21.4 Hz), 134.7 (d,  $J_{\text{C-F}}$  = 2.6 Hz).  $^{19}\text{F}$  NMR (376 MHz,  $\text{CDCl}_3$ )  $\delta$  = -172.82 (d,  $J$  = 46.4 Hz). Anal. Calcd. for  $\text{C}_9\text{H}_5\text{FN}_2$ : C, 67.50; H, 3.15; N, 17.49. Found: C, 67.49; H, 3.16; N, 17.48.

### 2-(3,5-Dimethoxyphenyl)-2-fluoroacetonitrile (**1i**)

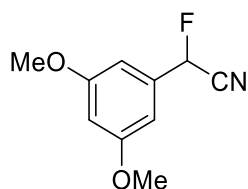

Compound **1i** was synthesized from 3,5-dimethoxybenzaldehyde in 58% overall yield as a yellow oil.  $^1\text{H}$  NMR (400 MHz,  $\text{CDCl}_3$ )  $\delta$  = 3.83 (s, 6H), 5.97 (d,  $J$  = 46.9 Hz, 1H), 6.56 (dd,  $J$  = 2.2, 2.1 Hz, 1H), 6.66 (ddd,  $J$  = 2.2, 2.1, 1.7 Hz, 2H).  $^{13}\text{C}$  NMR (100 MHz,  $\text{CDCl}_3$ )  $\delta$  = 55.7, 80.2 (d,  $J_{\text{C-F}}$  = 182.6 Hz), 103.1 (d,  $J_{\text{C-F}}$  = 3.1 Hz), 105.3 (d,  $J_{\text{C-F}}$  = 4.7 Hz), 115.3 (d,  $J_{\text{C-F}}$  = 33.6 Hz), 133.4 (d,  $J_{\text{C-F}}$  = 20.6 Hz), 161.6 (d,  $J_{\text{C-F}}$  = 1.5 Hz).  $^{19}\text{F}$  NMR (376 MHz,  $\text{CDCl}_3$ )  $\delta$  = -169.8 (dd,  $J$  = 46.8, 1.6 Hz). Anal. Calcd. for  $\text{C}_{10}\text{H}_{10}\text{FNO}_2$ : C, 61.53; H, 5.16; N, 7.18. Found: C, 61.57; H, 5.14; N, 7.20.

### 2-(Benzo[d][1,3]dioxol-5-yl)-2-fluoroacetonitrile (**1j**)

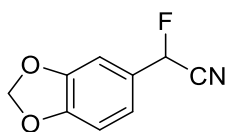

Compound **1j** was synthesized from benzo[d][1,3]dioxole-5-carbaldehyde in 71% overall yield as a yellow oil.  $^1\text{H}$  NMR (400 MHz,  $\text{CDCl}_3$ )  $\delta$  = 5.92 (d,  $J$  = 47.4 Hz, 1H), 6.05 (s, 2H), 6.87 (dd,  $J$  = 7.9, 0.7 Hz, 1H), 7.00 – 7.07 (m, 2H).  $^{13}\text{C}$  NMR (100 MHz,  $\text{CDCl}_3$ )  $\delta$  = 80.1 (d,  $J_{\text{C-F}}$  = 181.4

Hz), 102.1, 108.1 (d,  $J_{C-F} = 3.1$  Hz), 108.9 (d,  $J_{C-F} = 2.3$  Hz), 115.4 (d,  $J_{C-F} = 35.1$  Hz), 122.8 (d,  $J_{C-F} = 5.1$  Hz), 125.2 (d,  $J_{C-F} = 21.2$  Hz), 148.7 (d,  $J_{C-F} = 2.1$  Hz), 150.3 (d,  $J_{C-F} = 3.5$  Hz).  $^{19}\text{F}$  NMR (376 MHz,  $\text{CDCl}_3$ )  $\delta = -161.49$  (d,  $J = 47.5$  Hz). Anal. Calcd. for  $\text{C}_9\text{H}_6\text{FNO}_2$ : C, 60.34; H, 3.38; N, 7.82. Found: C, 60.33; H, 3.36; N, 7.80.

### 2-(9H-Fluoren-3-yl)-2-fluoroacetonitrile (**1l**)

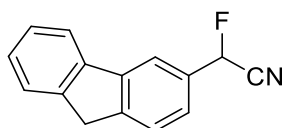

Compound **1m** was synthesized from 9H-fluorene-3-carbaldehyde in 69% overall yield as a white solid, Mp 86.2-88.8 °C.  $^1\text{H}$  NMR (400 MHz,  $\text{CDCl}_3$ )  $\delta = 3.97$  (s, 2H), 6.11 (d,  $J = 47.3$  Hz, 1H), 7.38 (dd,  $J = 7.4, 1.5$  Hz, 1H), 7.43 (d,  $J = 7.2$  Hz, 1H), 7.56 (dd,  $J = 7.8, 3.3$  Hz, 1H), 7.59 (dd,  $J = 6.9, 1.3$  Hz, 1H), 7.75 (s, 1H), 7.84 (d,  $J = 6.9$  Hz, 1H), 7.87 (d,  $J = 7.9$  Hz, 1H).  $^{13}\text{C}$  NMR (100 MHz,  $\text{CDCl}_3$ )  $\delta = 37.0, 80.6$  (d,  $J_{C-F} = 181.3$  Hz), 115.6 (d,  $J_{C-F} = 34.6$  Hz), 120.6 (d,  $J_{C-F} = 2.2$  Hz), 120.7, 124.6 (d,  $J_{C-F} = 4.1$  Hz), 125.4, 126.9 (d,  $J_{C-F} = 4.3$  Hz), 127.2, 128.1, 129.6 (d,  $J_{C-F} = 20.4$  Hz), 140.4 (d,  $J_{C-F} = 1.9$  Hz), 143.9 (d,  $J_{C-F} = 0.6$  Hz), 144.4 (d,  $J_{C-F} = 2.0$  Hz), 145.0 (d,  $J_{C-F} = 3.5$  Hz).  $^{19}\text{F}$  NMR (376 MHz,  $\text{CDCl}_3$ )  $\delta = -163.51$  (d,  $J = 47.4$  Hz). Anal. Calcd. for  $\text{C}_{15}\text{H}_{10}\text{FN}$ : C, 80.70; H, 4.52; N, 6.27. Found: C, 80.70; H, 4.54; N, 6.23.

## 3.2 Synthesis of ketimines

Ketimines **2a-2h** were prepared following a literature procedure.<sup>2</sup>

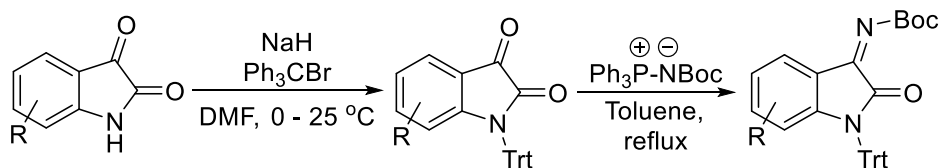

## 3.3 Procedures for the addition of $\alpha$ -fluoro arylacetonitriles **1** to ketimines **2**

Procedure A: Synthesis of the *anti*-diastereomer



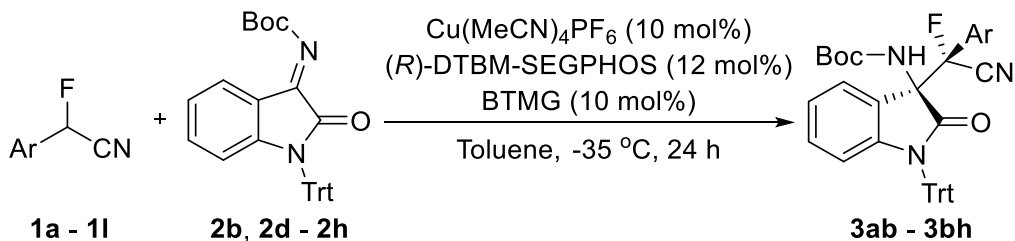

A mixture of  $\text{Cu}(\text{CH}_3\text{CN})_4\text{PF}_6$  (1.9 mg, 0.005 mmol) and (*R*)-DTBM-SEGPHOS, **L1** (7.1 mg, 0.006 mmol) was dissolved in anhydrous toluene (0.15 mL) under nitrogen at room temperature and stirred for 30 minutes. Ketimine **2** (0.05 mmol) and  $\alpha$ -fluoroarylacetonitrile **1** (0.055 mmol) were placed in a jacketed flask under nitrogen. The copper(I) complex solution was then transferred into this jacketed flask using another 0.2 mL of anhydrous toluene. The reaction mixture was cooled to  $-35\text{ }^\circ\text{C}$ , gently stirred, and a solution of 2-*tert*-butyl-1,1,3,3-tetramethylguanidine, BTMG (10.0  $\mu\text{L}$ , 0.5 *M* in dry toluene) was added. Upon completion of the reaction (24 hours), the solvent was removed under reduced pressure and the crude residue was purified by column chromatography as described below.

#### Procedure B: Synthesis of the *syn*-diastereomer

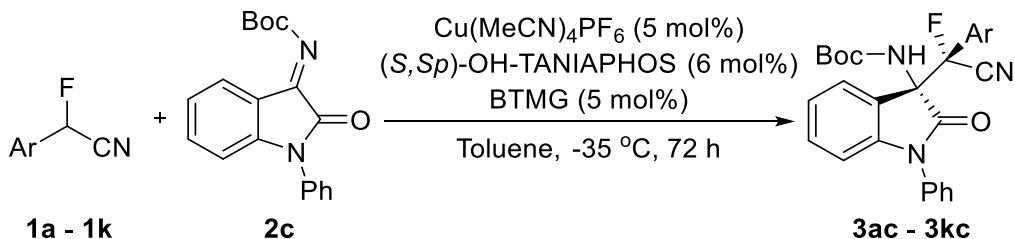

A mixture of  $\text{Cu}(\text{CH}_3\text{CN})_4\text{PF}_6$  (1.9 mg, 0.005 mmol) and (*S,S*)-OH-TANIAPHOS, **L14** (4.8 mg, 0.006 mmol) was dissolved in anhydrous THF (0.15 mL) under nitrogen at room temperature and stirred for 30 minutes. Ketimine **2c** (32.2 mg, 0.10 mmol) and  $\alpha$ -fluoro arylacetonitrile **1** (0.11 mmol) were placed in a jacketed flask under nitrogen. The copper(I) complex solution was then transferred into this jacketed flask using another 0.2 mL of anhydrous toluene. The reaction mixture was cooled to  $-35\text{ }^\circ\text{C}$ , gently stirred, followed by addition of a solution of 2-*tert*-butyl-1,1,3,3-tetramethylguanidine, BTMG (10.0  $\mu\text{L}$ , 0.5 *M* in dry toluene). Upon completion of the reaction (72 hours), the solvent was removed under reduced pressure and the crude residue was purified by column chromatography as described below.

### Gram scale synthesis of $\alpha$ -fluoro $\beta$ -aminonitrile *anti*-**3ab**

First,  $\text{Cu}(\text{CH}_3\text{CN})_4\text{PF}_6$  (28.0 mg, 0.075 mmol), (*R*)-DTBM-SEGPHOS, **L1** (106.2 mg, 0.090 mmol), ketimine **2b** (733.0 mg, 1.50 mmol), and  $\alpha$ -fluoro benzylnitrile **1a** (218.9 mg, 1.65 mmol) were dissolved using anhydrous toluene (4.5 mL) in a jacketed flask under nitrogen. Then, the reaction mixture was cooled to  $-35\text{ }^\circ\text{C}$  and stirred for an hour followed by addition of BTMG (12.8 mg, 0.075 mmol). The reaction mixture was stirred at  $-35\text{ }^\circ\text{C}$  for 48 hours. Upon completion, the solvent was removed under reduced pressure and the crude residue was purified by column chromatography to give **3ab** (937.7 mg) in 98% yield as a yellow crystalline solid. Mp  $119.8\text{--}122.2\text{ }^\circ\text{C}$ . The dr was determined as 12.7:1 using  $^{19}\text{F}$  NMR. The ee of the major diastereomer was determined as 90% using Phenomenex Amylose-2, hexanes/ethanol 90:10, flow rate = 1 mL/min condition.  $t_{\text{R}}(\text{major}) = 10.2\text{ min}$ ,  $t_{\text{R}}(\text{minor}) = 13.4\text{ min}$ .

*tert*-Butyl ((*R*)-3-((*S*)-cyano fluoro(phenyl)methyl)-2-oxo-1-tritylindolin-3-yl)carbamate (**3ab**)

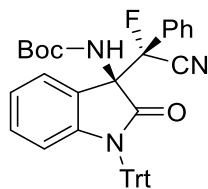

Compound **3ab** was obtained from  $\alpha$ -fluoro benzylnitrile **1a** (7.4 mg, 0.055 mmol) and *tert*-butyl (2-oxo-1-tritylindolin-3-ylidene)carbamate **2b** (24.4 mg, 0.050 mmol) by following procedure A. Chromatography purification (7.5:1 hexanes/ethyl acetate) gave 29.7 mg (95%) of a yellow crystalline solid. Mp  $119.8\text{--}122.2\text{ }^\circ\text{C}$ . The dr was determined as 12.7:1 using  $^{19}\text{F}$  NMR. The ee of the major diastereomer was determined as 90% using Phenomenex Amylose-2, hexanes/ethanol 90:10, flow rate = 1 mL/min condition.  $t_{\text{R}}(\text{minor}) = 10.1\text{ min}$ ,  $t_{\text{R}}(\text{major}) = 12.7\text{ min}$ .  $^1\text{H}$  NMR (400 MHz,  $\text{CDCl}_3$ )  $\delta = 1.34$  (s, 9H), 5.88 (d,  $J = 2.6\text{ Hz}$ , 1H), 6.10 (dd,  $J = 8.1, 0.9\text{ Hz}$ , 1H), 6.85 – 6.97 (m, 7H), 7.02 (dd,  $J = 7.5, 1.2\text{ Hz}$ , 1H), 7.09 – 7.17 (m, 9H), 7.22 (dd,  $J = 8.1, 1.1\text{ Hz}$ , 2H), 7.42 (dd,  $J = 7.8, 7.5\text{ Hz}$ , 2H), 7.55 (dd,  $J = 7.5, 1.0\text{ Hz}$ , 1H), 7.72 (dd,  $J = 7.6, 1.5\text{ Hz}$ , 1H).  $^{13}\text{C}$  NMR (100 MHz,  $\text{CDCl}_3$ )  $\delta = 28.1, 66.2$  (d,  $J_{\text{C-F}} = 21.5\text{ Hz}$ ), 75.8, 81.0, 93.4 (d,  $J_{\text{C-F}} = 201.1\text{ Hz}$ ), 115.2 (d,  $J_{\text{C-F}} = 31.8\text{ Hz}$ ), 116.6, 122.5, 122.6 (d,  $J_{\text{C-F}} = 3.2\text{ Hz}$ ), 124.3, 126.8, 127.0, 127.2, 128.5 (d,  $J_{\text{C-F}}$

$J_{\text{C-F}} = 1.5$  Hz), 129.8, 129.9, 130.3 (d,  $J_{\text{C-F}} = 22.9$  Hz), 131.1, 141.0, 144.5, 153.8, 173.1 (d,  $J_{\text{C-F}} = 1.3$  Hz).  $^{19}\text{F}$  NMR (376 MHz,  $\text{CDCl}_3$ )  $\delta = -161.0$  (s, major diastereomer),  $-150.6$  (s, minor diastereomer). HRMS (ESI-TOF)  $m/z$ :  $[\text{M}+\text{Na}]^+$  calcd. for  $\text{C}_{40}\text{H}_{34}\text{FN}_3\text{NaO}_3$  646.2476, found 646.2479.

*tert*-Butyl ((*R*)-3-((*S*)-cyanofluoro(3-chlorophenyl)methyl)-2-oxo-1-tritylindolin-3-yl)carbamate (**3bb**)

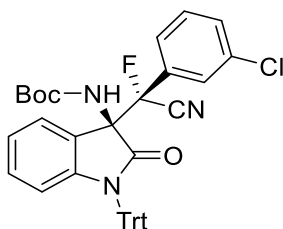

Compound **3bb** was obtained from 2-(3-chlorophenyl)-2-fluoroacetonitrile **1b** (9.3 mg, 0.055 mmol) and *tert*-butyl (2-oxo-1-tritylindolin-3-ylidene)carbamate **2b** (24.4 mg, 0.050 mmol) by following procedure A. Chromatography purification (7.5:1 hexanes/ethyl acetate) gave 31.9 mg (97%) of a yellow amorphous solid. The dr was determined as 36.0:1 using  $^{19}\text{F}$  NMR. The ee of the major diastereomer was determined as 97% using Phenomenex Amylose-2, hexanes/ethanol 90:10, flow rate = 1 mL/min condition.  $t_{\text{R}}(\text{minor}) = 8.1$  min,  $t_{\text{R}}(\text{major}) = 9.1$  min.  $^1\text{H}$  NMR (400 MHz,  $\text{CDCl}_3$ )  $\delta = 1.36$  (s, 9H), 5.85 (d,  $J = 2.4$  Hz, 1H), 6.16 (d,  $J = 8.2$  Hz, 1H), 6.92 (dd,  $J = 7.7$ , 7.5 Hz, 1H), 6.94 – 6.98 (m, 6H), 7.01 (dd,  $J = 8.1$ , 2.1 Hz, 1H), 7.05 (dd,  $J = 7.8$ , 7.4 Hz, 1H), 7.12 – 7.19 (m, 9H), 7.29 (dd,  $J = 2.1$ , 2.0 Hz, 1H), 7.34 (dd,  $J = 8.0$ , 8.0 Hz, 1H), 7.53 (ddd,  $J = 8.1$ , 2.1, 1.0 Hz, 1H), 7.74 (dd,  $J = 7.5$ , 1.4 Hz, 1H).  $^{13}\text{C}$  NMR (100 MHz,  $\text{CDCl}_3$ )  $\delta = 28.1$ , 66.0 (d,  $J_{\text{C-F}} = 21.2$  Hz), 75.9, 81.1, 92.7 (d,  $J_{\text{C-F}} = 202.7$  Hz), 114.8 (d,  $J_{\text{C-F}} = 31.9$  Hz), 116.8, 122.2 (d,  $J_{\text{C-F}} = 3.1$  Hz), 122.7, 124.4, 125.2 (d,  $J_{\text{C-F}} = 7.3$  Hz), 126.9 (d,  $J_{\text{C-F}} = 9.5$  Hz), 127.1, 127.3, 129.3, 129.6, 129.7, 131.4, 132.2 (d,  $J_{\text{C-F}} = 22.9$  Hz) 135.1, 140.9, 144.4, 153.8, 172.8.  $^{19}\text{F}$  NMR (376 MHz,  $\text{CDCl}_3$ )  $\delta = -161.0$  (s, major diastereomer),  $-150.6$  (s, minor diastereomer). HRMS (ESI-TOF)  $m/z$ :  $[\text{M}+\text{Na}]^+$  calcd. for  $\text{C}_{40}\text{H}_{33}\text{ClFN}_3\text{NaO}_3$  680.2087, found 680.2088.

*tert*-Butyl ((*R*)-3-((*S*)-cyanofluoro(3-bromophenyl)methyl)-2-oxo-1-tritylindolin-3-yl)carbamate (**3cb**)

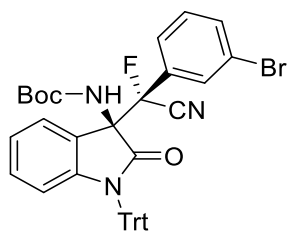

Compound **3cb** was obtained from 2-(3-bromophenyl)-2-fluoroacetonitrile **1c** (11.8 mg, 0.055 mmol) and *tert*-butyl (2-oxo-1-tritylindolin-3-ylidene)carbamate **2b** (24.4 mg, 0.050 mmol) by following procedure A. Chromatography purification (7.5:1 hexanes/ethyl acetate) gave 34.6 mg (98%) of a yellow amorphous solid. The dr was determined as 39.5:1 using  $^{19}\text{F}$  NMR. The ee of the major diastereomer was determined as 97% using Phenomenex Amylose-2, hexanes/ethanol 95:5 flow rate = 1 mL/min condition.  $t_{\text{R}}(\text{minor}) = 12.6$  min,  $t_{\text{R}}(\text{major}) = 14.4$  min.  $^1\text{H}$  NMR (400 MHz,  $\text{CDCl}_3$ )  $\delta = 1.36$  (s, 9H), 5.85 (d,  $J = 2.4$  Hz, 1H), 6.16 (dd,  $J = 8.3, 0.9$  Hz, 1H), 6.89 – 6.98 (m, 7H), 7.02 – 7.08 (m, 2H), 7.12 – 7.20 (m, 9H), 7.27 (dd,  $J = 8.0, 7.9$  Hz, 1H), 7.43 (dd,  $J = 2.0, 1.9$  Hz, 1H), 7.69 (ddd,  $J = 8.1, 2.0, 1.0$  Hz, 1H), 7.74 (dd,  $J = 7.5, 1.4$  Hz, 1H).  $^{13}\text{C}$  NMR (100 MHz,  $\text{CDCl}_3$ )  $\delta = 28.1, 66.1$  (d,  $J_{\text{C-F}} = 21.4$  Hz), 75.9, 81.1, 92.7 (d,  $J_{\text{C-F}} = 203.0$  Hz), 114.8 (d,  $J_{\text{C-F}} = 31.9$  Hz), 116.8, 122.2 (d,  $J_{\text{C-F}} = 3.2$  Hz), 122.7, 123.0 (d,  $J_{\text{C-F}} = 1.6$  Hz), 124.3, 125.6 (d,  $J_{\text{C-F}} = 7.3$  Hz), 127.1, 127.4, 129.4, 129.6, 129.7, 129.8, 132.4 (d,  $J_{\text{C-F}} = 23.0$  Hz), 134.3, 140.9, 144.3, 153.8, 172.8 (d,  $J_{\text{C-F}} = 1.2$  Hz).  $^{19}\text{F}$  NMR (376 MHz,  $\text{CDCl}_3$ )  $\delta = -161.2$  (s, major diastereomer), -150.4 (s, minor diastereomer). HRMS (ESI-TOF)  $m/z$ :  $[\text{M}+\text{Na}]^+$  calcd. for  $\text{C}_{40}\text{H}_{33}\text{BrFN}_3\text{NaO}_3$  724.1582, found 724.1585.

*tert*-Butyl ((*R*)-3-((*S*)-cyanofluoro(2-fluorophenyl)methyl)-2-oxo-1-tritylindolin-3-yl)carbamate (**3db**)

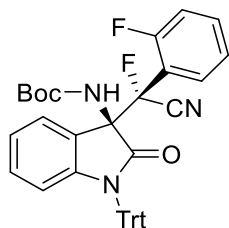

Compound **3db** was obtained from 2-(2-fluorophenyl)-2-fluoroacetonitrile **1d** (8.4 mg, 0.055 mmol) and *tert*-butyl (2-oxo-1-tritylindolin-3-ylidene)carbamate **2b** (24.4 mg, 0.050 mmol) by following procedure A. Chromatography purification (7.5:1 hexanes/ethyl acetate) gave 30.2 mg (94%) of a yellow amorphous solid. The dr was determined as 9.4:1 using  $^{19}\text{F}$  NMR. The ee of the major diastereomer was determined as 93% using Phenomenex Amylose-2, hexanes/ethanol 95:5, flow rate = 1 mL/min condition.  $t_{\text{R}}(\text{minor}) = 16.3$  min,  $t_{\text{R}}(\text{major}) = 18.2$  min.  $^1\text{H}$  NMR (400 MHz,  $\text{CDCl}_3$ )  $\delta = 1.32$  (s, 9H), 5.85 (d,  $J = 2.3$  Hz 1H), 6.20 (dd,  $J = 8.2, 1.1$  Hz, 1H), 6.86 – 6.98 (m, 2H), 7.13 – 7.19 (m, 15H), 7.23 (dd,  $J = 7.9, 1.1$  Hz, 1H), 7.29 (dd,  $J = 7.4, 1.3$  Hz, 1H), 7.37 (dd,  $J = 8.7, 7.6$  Hz, 1H), 7.44 (m, 1H), 7.53 (m, 1H).  $^{13}\text{C}$  NMR (100 MHz,  $\text{CDCl}_3$ )  $\delta = 28.1, 66.6$  (d,  $J_{\text{C-F}} = 24.0$  Hz), 69.4, 75.8, 81.0, 92.3 (d,  $J_{\text{C-F}} = 202.9$  Hz), 113.6 (d,  $J_{\text{C-F}} = 30.6$  Hz), 116.3, 116.8 (d,  $J_{\text{C-F}} = 23.0$  Hz), 121.9, 122.3, 124.4 (dd,  $J_{\text{C-F}} = 3.7, 1.4$  Hz), 125.5, 127.0, 127.3, 127.9, 129.2 (d,  $J_{\text{C-F}} = 15.4$  Hz), 129.8, 129.9, 133.2 (d,  $J_{\text{C-F}} = 8.4$  Hz), 141.6 (d,  $J_{\text{C-F}} = 68.2$  Hz), 142.0, 144.4, 153.6, 158.9 (dd,  $J_{\text{C-F}} = 253.5, 4.4$  Hz), 172.7.  $^{19}\text{F}$  NMR (376 MHz,  $\text{CDCl}_3$ )  $\delta = -156.2$  (d,  $J = 7.7$  Hz, major diastereomer),  $-154.5$  (d,  $J = 12.3$  Hz, minor diastereomer),  $-107.2$  (m, major and minor diastereomers). HRMS (ESI-TOF)  $m/z$ :  $[\text{M}+\text{Na}]^+$  calcd. for  $\text{C}_{40}\text{H}_{33}\text{F}_2\text{N}_3\text{NaO}_3$  664.2382, found 664.2384.

*tert*-Butyl ((*R*)-3-((*S*)-cyanofluoro(3-methoxyphenyl)methyl)-2-oxo-1-tritylindolin-3-yl)carbamate (**3eb**)

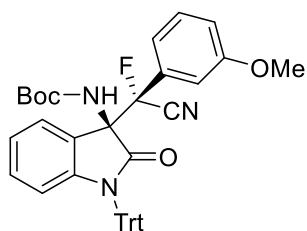

Compound **3eb** was obtained from 2-(3-methoxyphenyl)-2-fluoroacetonitrile **1e** (9.1 mg, 0.055 mmol) and *tert*-butyl (2-oxo-1-tritylindolin-3-ylidene)carbamate **2b** (24.4 mg, 0.050 mmol) by following procedure A. Chromatography purification (7.5:1 hexanes/ethyl acetate) gave 31.5 mg (96%) of a yellow amorphous solid. The dr was determined as 24.0:1 using  $^{19}\text{F}$  NMR. The ee of the major diastereomer was determined as 91% using Phenomenex Amylose-2, hexanes/ethanol 90:10, flow rate = 1 mL/min condition.  $t_{\text{R}}(\text{minor}) = 10.7$  min,  $t_{\text{R}}(\text{major}) = 11.7$  min.  $^1\text{H}$  NMR (400

MHz, CDCl<sub>3</sub>)  $\delta$  = 1.34 (s, 9H), 3.61 (s, 3H), 5.88 (d,  $J$  = 2.7 Hz, 1H), 6.13 (dd,  $J$  = 8.2, 0.9 Hz, 1H), 6.65 (dd,  $J$  = 2.1, 2.0 Hz, 1H), 6.82 (ddd,  $J$  = 7.9, 1.9, 1.0 Hz, 1H), 6.90 (dd,  $J$  = 8.0, 7.9 Hz, 1H), 6.97 – 6.92 (m, 6H), 7.03 (dd,  $J$  = 8.2, 7.9 Hz, 1H), 7.07 (ddd,  $J$  = 8.3, 2.5, 0.9 Hz, 1H), 7.10 – 7.17 (m, 9H), 7.33 (dd,  $J$  = 8.3, 7.8 Hz, 1H), 7.75 (dd,  $J$  = 7.6, 1.5 Hz, 1H). <sup>13</sup>C NMR (100 MHz, CDCl<sub>3</sub>)  $\delta$  = 28.1, 55.4, 66.2 (d,  $J_{C-F}$  = 21.4 Hz), 75.8, 81.0, 93.1 (d,  $J_{C-F}$  = 202.0 Hz), 112.1 (d,  $J_{C-F}$  = 8.5 Hz), 115.2 (d,  $J_{C-F}$  = 32.0 Hz), 116.7, 117.3, 118.8 (d,  $J_{C-F}$  = 8.7 Hz), 122.5, 122.8 (d,  $J_{C-F}$  = 3.2 Hz), 124.2, 127.0, 127.2, 129.1, 129.5 (d,  $J_{C-F}$  = 1.1 Hz), 129.8, 131.4 (d,  $J_{C-F}$  = 22.9 Hz), 141.0, 144.6, 153.8, 159.5, 173.1 (d,  $J_{C-F}$  = 1.5 Hz). <sup>19</sup>F NMR (376 MHz, CDCl<sub>3</sub>)  $\delta$  = -161.1 (s, major diastereomer), -149.0 (s, minor diastereomer). HRMS (ESI-TOF)  $m/z$ : [M+Na]<sup>+</sup> calcd. for C<sub>41</sub>H<sub>36</sub>FN<sub>3</sub>NaO<sub>4</sub> 676.2582, found 676.2584.

Methyl 4-((*S*)-((*R*)-3-((*tert*-butoxycarbonyl)amino)-2-oxo-1-tritylindolin-3-yl)  
(cyano)fluoromethyl)benzoate (**3fb**)

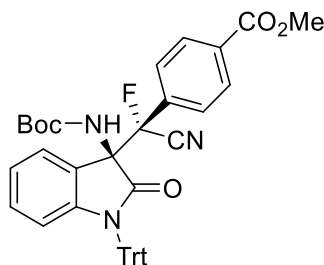

Compound **3fb** was obtained from methyl 4-(cyanofluoromethyl)benzoate **1f** (10.6 mg, 0.055 mmol) and *tert*-butyl (2-oxo-1-tritylindolin-3-ylidene)carbamate **2b** (24.4 mg, 0.050 mmol) by following procedure A. Chromatography purification (6.5:1 hexanes/ethyl acetate) gave 33.6 mg (99%) of a yellow amorphous solid. The dr was determined as 9.1:1 using <sup>19</sup>F NMR. The ee of the major diastereomer was determined as 91% using Phenomenex Amylose-2, hexanes/ethanol 90:10, flow rate = 1 mL/min condition.  $t_R$ (minor) = 17.0 min,  $t_R$ (major) = 20.8 min. <sup>1</sup>H NMR (400 MHz, CDCl<sub>3</sub>)  $\delta$  = 1.36 (s, 9H), 3.97 (s, 3H), 5.86 (d,  $J$  = 2.4 Hz, 1H), 6.11 (dd,  $J$  = 8.3, 0.9 Hz, 1H), 6.87 – 6.97 (m, 7H), 7.05 (ddd,  $J$  = 7.8, 7.6, 1.0 Hz, 1H), 7.08 – 7.17 (m, 9H), 7.26 (dd,  $J$  = 8.6, 0.9 Hz, 2H), 7.74 (dd,  $J$  = 7.7, 1.5 Hz, 1H), 8.03 (dd,  $J$  = 8.6, 0.8 Hz, 2H). <sup>13</sup>C NMR (100 MHz, CDCl<sub>3</sub>)  $\delta$  = 28.3, 52.7, 66.1 (d,  $J_{C-F}$  = 21.2 Hz), 76.1, 81.3, 93.2 (d,  $J_{C-F}$  = 202.3 Hz), 115.0 (d,  $J_{C-F}$  = 32.0 Hz), 116.9, 122.4 (d,  $J_{C-F}$  = 2.9 Hz), 122.8, 124.6, 127.2, 127.4, 129.5, 129.7 (d,  $J_{C-F}$  = 1.5 Hz),

129.9, 133.0, 134.8 (d,  $J_{C-F} = 23.0$  Hz), 141.1, 144.6, 153.9, 166.0, 172.8 (d,  $J_{C-F} = 1.0$  Hz).  $^{19}\text{F}$  NMR (376 MHz,  $\text{CDCl}_3$ )  $\delta = -161.2$  (s, major diastereomer),  $-151.7$  (s, minor diastereomer). HRMS (ESI-TOF)  $m/z$ :  $[\text{M}+\text{Na}]^+$  calcd. for  $\text{C}_{42}\text{H}_{36}\text{FN}_3\text{NaO}_5$  704.2531, found 704.2534.

*tert*-Butyl ((*R*)-3-((*S*)-cyanofluoro(3-nitrophenyl)methyl)-2-oxo-1-tritylindolin-3-yl)carbamate (**3gb**)

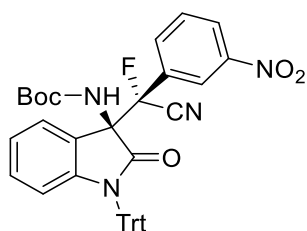

Compound **3gb** was obtained from 2-(3-nitrophenyl)-2-fluoroacetonitrile **1g** (9.9 mg, 0.055 mmol) and *tert*-butyl (2-oxo-1-tritylindolin-3-ylidene)carbamate **2b** (24.4 mg, 0.050 mmol) by following procedure A. Chromatography purification (5:1 hexanes/ethyl acetate) gave 32.1 mg (96%) of a yellow amorphous solid. The dr was determined as 8.5:1 using  $^{19}\text{F}$  NMR. The ee of the major diastereomer was determined as 94% using Phenomenex Amylose-2, hexanes/ethanol 90:10, flow rate = 1 mL/min condition.  $t_{\text{R}}(\text{minor}) = 11.0$  min,  $t_{\text{R}}(\text{major}) = 14.0$  min.  $^1\text{H}$  NMR (400 MHz,  $\text{CDCl}_3$ )  $\delta = 1.38$  (s, 9H), 5.83 (d,  $J = 2.0$  Hz, 1H), 6.16 (d,  $J = 8.2, 0.9$  Hz, 1H), 6.91 – 6.99 (m, 7H), 7.08 (dd,  $J = 7.6, 7.5$  Hz, 1H), 7.11 – 7.19 (m, 9H), 7.40 (dd,  $J = 7.5, 2.3$  Hz, 1H), 7.54 (dd,  $J = 8.1, 7.9$  Hz, 1H), 7.78 (dd,  $J = 7.6, 1.4$  Hz, 1H), 8.10 (dd,  $J = 2.0, 1.9$  Hz, 1H), 8.36 (ddd,  $J = 8.2, 2.2, 1.0$  Hz, 1H).  $^{13}\text{C}$  NMR (100 MHz,  $\text{CDCl}_3$ )  $\delta = 28.1, 65.8$  (d,  $J_{C-F} = 21.5$  Hz), 75.9, 81.4, 92.4 (d,  $J_{C-F} = 203.5$  Hz), 114.4 (d,  $J_{C-F} = 31.7$  Hz), 116.8, 121.9 (d,  $J_{C-F} = 2.9$  Hz), 122.0 (d,  $J_{C-F} = 9.5$  Hz), 122.6 (d,  $J_{C-F} = 29.3$  Hz), 122.9, 124.7, 125.9, 127.1, 127.4, 129.5, 129.6 (d,  $J_{C-F} = 6.2$  Hz), 132.3, 132.6 (d,  $J_{C-F} = 7.0$  Hz) 140.8, 144.2, 147.9, 153.7, 172.0.  $^{19}\text{F}$  NMR (376 MHz,  $\text{CDCl}_3$ )  $\delta = -160.7$  (s, major diastereomer),  $-150.7$  (s, minor diastereomer). Anal. Calcd. for  $\text{C}_{40}\text{H}_{33}\text{FN}_4\text{O}_5$ : C, 71.84; H, 4.97; N, 8.38. Found: C, 71.83; H, 5.21; N, 8.33.

*tert*-Butyl ((*R*)-3-((*S*)-cyanofluoro(3-cyanophenyl)methyl)-2-oxo-1-tritylindolin-3-yl)carbamate (**3hb**)

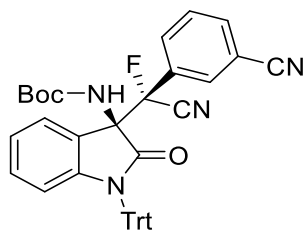

Compound **3hb** was obtained from 2-(3-cyanophenyl)-2-fluoroacetonitrile **1h** (8.8 mg, 0.055 mmol) and *tert*-butyl (2-oxo-1-tritylindolin-3-ylidene)carbamate **2b** (24.4 mg, 0.050 mmol) by following procedure A. Chromatography purification (6:1 hexanes/ethyl acetate) gave 31.4 mg (97%) of a yellow amorphous solid. The dr was determined as 9.0:1 using  $^{19}\text{F}$  NMR. The ee of the major diastereomer was determined as 95% using Phenomenex Amylose-2, hexanes/ethanol 90:10, flow rate = 1 mL/min condition.  $t_{\text{R}}(\text{minor}) = 11.6$  min,  $t_{\text{R}}(\text{major}) = 16.1$  min.  $^1\text{H}$  NMR (400 MHz,  $\text{CDCl}_3$ )  $\delta = 1.37$  (s, 9H), 5.81 (d,  $J = 2.2$  Hz, 1H), 6.18 (dd,  $J = 8.2, 0.8$  Hz, 1H), 6.92 – 7.02 (m, 7H), 7.08 (dd,  $J = 7.8, 7.6$  Hz, 1H), 7.12 – 7.22 (m, 9H), 7.36 (dd,  $J = 8.3, 1.5$  Hz, 1H), 7.48 – 7.55 (m, 2H), 7.75 (dd,  $J = 7.6, 1.4$  Hz, 1H), 7.80 (ddd,  $J = 7.8, 2.1, 1.1$  Hz, 1H).  $^{13}\text{C}$  NMR (100 MHz,  $\text{CDCl}_3$ )  $\delta = 28.1, 65.8$  (d,  $J_{\text{C-F}} = 21.5$  Hz), 75.9, 81.4, 92.5 (d,  $J_{\text{C-F}} = 202.8$  Hz), 114.5 (d,  $J_{\text{C-F}} = 31.9$  Hz), 114.6, 116.9, 117.2, 121.8 (d,  $J_{\text{C-F}} = 2.8$  Hz), 122.9, 124.8, 127.2, 127.5, 129.3 (d,  $J_{\text{C-F}} = 1.2$  Hz), 129.6, 129.7, 130.4 (d,  $J_{\text{C-F}} = 9.3$  Hz), 131.0 (d,  $J_{\text{C-F}} = 7.3$  Hz), 132.1 (d,  $J_{\text{C-F}} = 23.4$  Hz), 134.5, 140.8, 144.4, 153.7, 172.3.  $^{19}\text{F}$  NMR (376 MHz,  $\text{CDCl}_3$ )  $\delta = -160.8$  (s, major diastereomer),  $-151.8$  (s, minor diastereomer). Anal. Calcd. for  $\text{C}_{41}\text{H}_{33}\text{FN}_4\text{O}_3$ : C, 75.91; H, 5.13; N, 8.64. Found: C, 75.63; H, 5.35; N, 8.73.

*tert*-Butyl ((*R*)-3-((*S*)-cyano(3,5-dimethoxyphenyl)fluoromethyl)-2-oxo-1-tritylindolin-3-yl)carbamate (**3ib**)

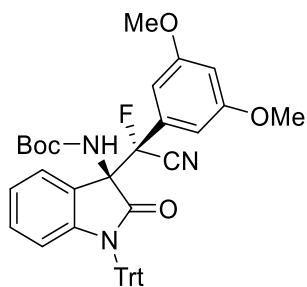



Compound **3ib** was obtained from 2-(3,5-dimethoxyphenyl)-2-fluoroacetonitrile **1i** (10.7 mg, 0.055 mmol) and *tert*-butyl (2-oxo-1-tritylindolin-3-ylidene)carbamate **2b** (24.4 mg, 0.050 mmol) by following procedure A. Chromatography purification (7.5:1 hexanes/ethyl acetate) gave 28.5 mg (83%) of a yellow amorphous solid. The dr was determined as >50:1 using  $^{19}\text{F}$  NMR. The ee of the major diastereomer was determined as 91% using Phenomenex Amylose-2, hexanes/ethanol 95:5, flow rate = 1 mL/min condition.  $t_{\text{R}}(\text{major}) = 15.9$  min,  $t_{\text{R}}(\text{minor}) = 19.6$  min.  $^1\text{H}$  NMR (400 MHz,  $\text{CDCl}_3$ )  $\delta = 1.33$  (s, 9H), 3.60 (s, 6H), 5.89 (d,  $J = 2.9$  Hz, 1H), 6.17 (dd,  $J = 8.1, 0.9$  Hz, 1H), 6.28 (bs, 2H), 6.59 (dd,  $J = 2.2, 2.2$  Hz, 1H), 6.93 (ddd,  $J = 8.0, 7.7, 1.5$  Hz, 1H), 6.95 – 7.00 (m, 6H), 7.04 (ddd,  $J = 7.6, 7.5, 1.0$  Hz, 1H), 7.09 – 7.20 (m, 9H), 7.76 (dd,  $J = 7.6, 1.4$  Hz, 1H).  $^{13}\text{C}$  NMR (100 MHz,  $\text{CDCl}_3$ )  $\delta = 28.1, 55.5, 66.1$  (d,  $J_{\text{C-F}} = 21.0$  Hz), 75.7, 81.0, 92.9 (d,  $J_{\text{C-F}} = 202.7$  Hz), 103.5, 104.6 (d,  $J_{\text{C-F}} = 9.1$  Hz), 115.1 (d,  $J_{\text{C-F}} = 32.1$  Hz), 116.7, 122.4, 123.1 (d,  $J_{\text{C-F}} = 3.2$  Hz), 124.1, 127.0, 127.3, 129.0, 129.7, 131.9 (d,  $J_{\text{C-F}} = 22.9$  Hz), 141.0, 144.7, 153.9, 160.7, 173.1 (d,  $J_{\text{C-F}} = 1.7$  Hz).  $^{19}\text{F}$  NMR (376 MHz,  $\text{CDCl}_3$ )  $\delta = -161.6$ . HRMS (ESI-TOF)  $m/z$ :  $[\text{M}+\text{Na}]^+$  calcd. for  $\text{C}_{42}\text{H}_{38}\text{FN}_3\text{NaO}_5$  706.2688, found 706.2690.

*tert*-Butyl ((*R*)-3-((*S*)-benzo[d][1,3]dioxol-5-yl(cyano)fluoromethyl)-2-oxo-1-tritylindolin-3-yl)carbamate (**3jb**)

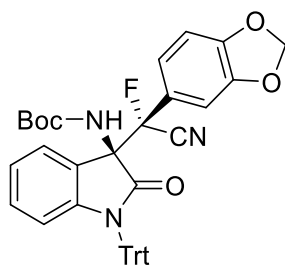

Compound **3jb** was obtained from 2-(benzo[d][1,3]dioxol-5-yl)-2-fluoroacetonitrile **1j** (9.9 mg, 0.055 mmol) and *tert*-butyl (2-oxo-1-tritylindolin-3-ylidene)carbamate **2b** (24.4 mg, 0.050 mmol) by following procedure A except for stirring the reaction mixture at  $-5$  °C. Chromatography purification (7.5:1 hexanes/ethyl acetate) gave 26.8 mg (81%) of a yellow amorphous solid. The dr was determined as 45.0:1 using  $^{19}\text{F}$  NMR. The ee of the major diastereomer was determined as 86% using Phenomenex Amylose-2, hexanes/ethanol 90:10, flow rate = 1 mL/min condition.  $t_{\text{R}}(\text{minor}) = 12.0$  min,  $t_{\text{R}}(\text{major}) = 13.2$  min.  $^1\text{H}$  NMR (400 MHz,  $\text{CDCl}_3$ )  $\delta = 1.36$  (s, 9H), 5.79 (d,

$J = 1.4$  Hz, 1H), 5.86 (d,  $J = 2.6$  Hz, 1H), 6.04 (d,  $J = 1.4$  Hz, 1H), 6.12 (dd,  $J = 8.2, 0.9$  Hz, 1H), 6.55 (dd,  $J = 8.2, 2.1$  Hz, 1H), 6.78 (d,  $J = 8.2$  Hz, 1H), 6.84 (d,  $J = 2.0$  Hz, 1H), 6.89 (dd,  $J = 7.9, 7.8$  Hz, 1H), 6.97 – 7.05 (m, 7H), 7.15 – 7.21 (m, 9H), 7.71 (dd,  $J = 7.6, 1.4$  Hz, 1H).  $^{13}\text{C}$  NMR (100 MHz,  $\text{CDCl}_3$ )  $\delta = 28.1, 66.4$  (d,  $J_{\text{C-F}} = 21.8$  Hz), 75.9, 81.0, 93.4 (d,  $J_{\text{C-F}} = 201.3$  Hz), 102.0, 107.5 (d,  $J_{\text{C-F}} = 10.5$  Hz), 107.9, 115.2 (d,  $J_{\text{C-F}} = 31.4$  Hz), 116.6, 121.6 (d,  $J_{\text{C-F}} = 6.5$  Hz), 122.5, 122.7 (d,  $J_{\text{C-F}} = 2.9$  Hz), 124.1, 127.1, 127.3, 127.9, 129.1, 129.9, 141.1, 144.6, 148.2 (d,  $J_{\text{C-F}} = 1.5$  Hz), 150.0 (d,  $J_{\text{C-F}} = 1.2$  Hz), 153.9, 173.1 (d,  $J_{\text{C-F}} = 1.3$  Hz).  $^{19}\text{F}$  NMR (376 MHz,  $\text{CDCl}_3$ )  $\delta = -157.8$  (s, major diastereomer),  $-148.5$  (s, minor diastereomer). Anal. Calcd. for  $\text{C}_{41}\text{H}_{34}\text{FN}_3\text{O}_5$ : C, 73.75; H, 5.13; N, 6.29. Found: C, 73.99; H, 5.25; N, 6.43.

*tert*-Butyl ((*R*)-3-((*S*)-cyanofluoro(2-naphthyl)methyl)-2-oxo-1-tritylindolin-3-yl)carbamate  
(**3kb**)

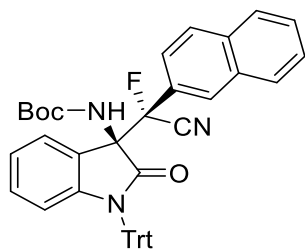

Compound **3kb** was obtained from 2-(2-naphthyl)-2-fluoroacetonitrile **1k** (10.2 mg, 0.055 mmol) and *tert*-butyl (2-oxo-1-tritylindolin-3-ylidene)carbamate **2b** (24.4 mg, 0.050 mmol) by following procedure A. Chromatography purification (6.5:1 hexanes/ethyl acetate) gave 33.2 mg (99%) of a white amorphous solid. The dr was determined as 33.0:1 using  $^{19}\text{F}$  NMR. The ee of the major diastereomer was determined as 93% using CHIRALPAK IA, hexanes/isopropanol/ethanol 96:2.5:1.5, flow rate = 1 mL/min condition.  $t_{\text{R}}$ (major) = 10.4 min,  $t_{\text{R}}$ (minor) = 17.8 min.  $^1\text{H}$  NMR (400 MHz,  $\text{CDCl}_3$ )  $\delta = 1.36$  (s, 9H), 5.96 (d,  $J = 2.5$  Hz, 1H), 6.02 (dd,  $J = 8.2, 0.9$  Hz, 1H), 6.75 – 6.84 (m, 6H), 6.86 – 6.95 (m, 7H), 7.01 – 7.09 (m, 4H), 7.21 (dd,  $J = 8.7, 2.0$  Hz, 1H), 7.56 (ddd,  $J = 8.2, 6.9, 1.4$  Hz, 1H), 7.63 (ddd,  $J = 8.2, 6.9, 1.4$  Hz, 1H), 7.73 (d,  $J = 1.4$  Hz, 1H), 7.77 – 7.84 (m, 2H), 7.86 (dd,  $J = 8.7, 1.0$  Hz, 1H), 7.93 (dd,  $J = 8.2, 1.4$  Hz, 1H).  $^{13}\text{C}$  NMR (100 MHz,  $\text{CDCl}_3$ )  $\delta = 28.1, 66.4$  (d,  $J_{\text{C-F}} = 21.4$  Hz), 75.7, 81.0, 93.6 (d,  $J_{\text{C-F}} = 201.9$  Hz), 115.3 (d,  $J_{\text{C-F}} = 31.8$  Hz), 116.6, 122.6, 122.7 (d,  $J_{\text{C-F}} = 3.2$  Hz), 123.1 (d,  $J_{\text{C-F}} = 7.6$  Hz), 124.3, 126.8, 127.0, 127.1, 127.4 (d,  $J_{\text{C-F}} = 22.6$  Hz), 127.5, 128.0, 128.3, 128.4 (d,  $J_{\text{C-F}} = 1.4$  Hz), 129.1, 129.6, 129.8, 132.4 (d,  $J_{\text{C-F}}$

$J_{\text{C-F}} = 1.1$  Hz), 134.2, 140.8, 144.4, 153.9, 173.1 (d,  $J_{\text{C-F}} = 1.5$  Hz).  $^{19}\text{F}$  NMR (376 MHz,  $\text{CDCl}_3$ )  $\delta = -160.8$  (s, major diastereomer),  $-149.1$  (s, minor diastereomer). HRMS (ESI-TOF)  $m/z$ :  $[\text{M}+\text{Na}]^+$  calcd. for  $\text{C}_{44}\text{H}_{36}\text{FN}_3\text{NaO}_3$  696.2633, found 696.2633.

*tert*-Butyl ((*R*)-3-((*S*)-cyano(9H-fluoren-2-yl)fluoromethyl)-2-oxo-1-tritylindolin-3-yl)carbamate (**3b**)

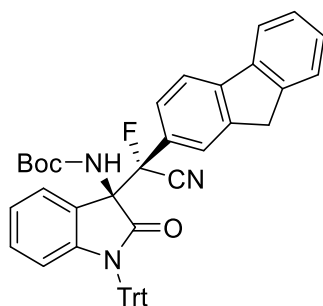

Compound **3b** was obtained from 2-(9H-fluoren-2-yl)-2-fluoroacetonitrile **1l** (12.3 mg, 0.055 mmol) and *tert*-butyl (2-oxo-1-tritylindolin-3-ylidene)carbamate **2b** (24.4 mg, 0.050 mmol) by following procedure A. Chromatography purification (7.5:1 hexanes/ethyl acetate) gave 34.4 mg (97%) of a white crystalline solid. Mp 152.5-154.8 °C. The dr was determined as 12.0:1 using  $^{19}\text{F}$  NMR. The ee of the major diastereomer was determined as 88% using Phenomenex Amylose-2, hexanes/ethanol 90:10, flow rate = 1 mL/min condition.  $t_{\text{R}}(\text{major}) = 18.2$  min,  $t_{\text{R}}(\text{minor}) = 25.4$  min.  $^1\text{H}$  NMR (400 MHz,  $\text{CDCl}_3$ )  $\delta = 1.37$  (s, 9H), 3.77 (d,  $J = 22.2$  Hz, 1H), 3.87 (d,  $J = 22.0$  Hz, 1H), 5.93 (d,  $J = 2.3$  Hz, 1H), 6.08 (dd,  $J = 8.2, 0.9$  Hz, 1H), 6.88 (dd,  $J = 8.0, 1.4$  Hz, 1H), 6.90 – 6.95 (m, 6H), 6.95 – 7.03 (m, 9H), 7.05 (ddd,  $J = 7.8, 7.7, 1.0$  Hz, 1H), 7.15 (dd,  $J = 8.1, 1.6$  Hz, 1H), 7.39 (ddd,  $J = 7.4, 7.4, 1.2$  Hz, 1H), 7.42 – 7.48 (m, 2H), 7.55 (dd,  $J = 7.3, 1.3$  Hz, 1H), 7.73 – 7.79 (m, 2H), 7.84 (dd,  $J = 7.6, 1.1$  Hz, 1H).  $^{13}\text{C}$  NMR (100 MHz,  $\text{CDCl}_3$ )  $\delta = 28.3, 36.9, 66.7$  (d,  $J_{\text{C-F}} = 21.8$  Hz), 76.0, 81.1, 94.1 (d,  $J_{\text{C-F}} = 201.5$  Hz), 115.6 (d,  $J_{\text{C-F}} = 31.5$  Hz), 116.7, 119.7, 120.7, 122.6, 123.1 (d,  $J_{\text{C-F}} = 3.2$  Hz), 123.4, 123.5 (d,  $J_{\text{C-F}} = 8.6$  Hz), 124.4, 125.4, 126.0 (d,  $J_{\text{C-F}} = 7.3$  Hz), 127.0, 127.3, 127.4, 128.1, 129.1, 129.8, 130.0, 140.5, 141.2, 143.5 (d,  $J_{\text{C-F}} = 1.2$  Hz), 144.6, 144.8 (d,  $J_{\text{C-F}} = 0.8$  Hz), 154.0, 173.3 (d,  $J_{\text{C-F}} = 1.1$  Hz).  $^{19}\text{F}$  NMR (376 MHz,  $\text{CDCl}_3$ )  $\delta = -160.3$  (s, major diastereomer),  $-148.9$  (s, minor diastereomer). Anal. Calcd. for  $\text{C}_{47}\text{H}_{38}\text{FN}_3\text{O}_3$ : C, 79.30; H, 5.38; N, 5.90. Found: C, 78.93; H, 5.66; N, 5.94.

*tert*-Butyl ((*R*)-3-((*S*)-cyanofluoro(phenyl)methyl)-5-methyl-2-oxo-1-tritylindolin-3-yl)carbamate (**3ad**)

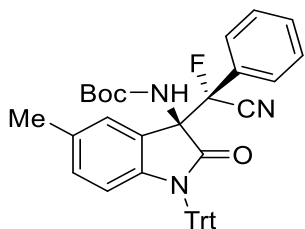

Compound **3ad** was obtained from 2-(phenyl)-2-fluoroacetonitrile **1a** (7.4 mg, 0.055 mmol) and *tert*-butyl (5-methyl-2-oxo-1-tritylindolin-3-ylidene)carbamate **2d** (25.1 mg, 0.050 mmol) by following procedure A. Chromatography purification (7.5:1 hexanes/ethyl acetate) gave 29.4 mg (92%) of a yellow amorphous solid. The dr was determined as 9.8:1 using  $^{19}\text{F}$  NMR. The ee of the major diastereomer was determined as 84% using Phenomenex Amylose-2, hexanes/ethanol 90:10, flow rate = 1 mL/min condition.  $t_{\text{R}}(\text{minor}) = 10.1$  min,  $t_{\text{R}}(\text{major}) = 12.7$  min.  $^1\text{H}$  NMR (400 MHz,  $\text{CDCl}_3$ )  $\delta = 1.35$  (s, 9H), 2.29 (s, 3H), 5.86 (d,  $J = 2.7$  Hz, 1H), 6.00 (d,  $J = 8.3$  Hz, 1H), 6.70 (dd,  $J = 8.3, 1.9$  Hz, 1H), 6.87 – 7.00 (m, 6H), 7.08 – 7.18 (m, 9H), 7.21 – 7.25 (m, 2H), 7.40 – 7.46 (m, 2H), 7.52 (d,  $J = 2.2$  Hz, 1H), 7.55 (dd,  $J = 7.8, 7.8$  Hz, 1H).  $^{13}\text{C}$  NMR (100 MHz,  $\text{CDCl}_3$ )  $\delta = 21.1, 28.1, 66.3$  (d,  $J_{\text{C-F}} = 21.6$  Hz), 75.7, 80.9, 93.4 (d,  $J_{\text{C-F}} = 201.1$  Hz), 115.3 (d,  $J_{\text{C-F}} = 31.7$  Hz), 116.3, 122.5 (d,  $J_{\text{C-F}} = 2.9$  Hz), 124.9, 126.8, 126.9, 127.2, 128.5, 129.8, 129.9 (d,  $J_{\text{C-F}} = 5.5$  Hz), 130.3 (d,  $J_{\text{C-F}} = 22.6$  Hz), 131.1, 132.0, 141.1, 141.9, 153.9, 173.1.  $^{19}\text{F}$  NMR (376 MHz,  $\text{CDCl}_3$ )  $\delta = -160.8$  (s, major diastereomer),  $-150.5$  (s, minor diastereomer). HRMS (ESI-TOF)  $m/z$ :  $[\text{M}+\text{Na}]^+$  calcd. for  $\text{C}_{41}\text{H}_{36}\text{FN}_3\text{NaO}_3$  637.2735, found 637.2686.

*tert*-Butyl ((*R*)-3-((*S*)-(3-bromophenyl)(cyano)fluoromethyl)-5-methyl-2-oxo-1-tritylindolin-3-yl)carbamate (**3cd**)

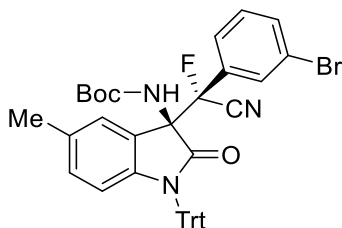

Compound **3cd** was obtained from 2-(3-bromophenyl)-2-fluoroacetonitrile **1c** (11.8 mg, 0.055 mmol) and *tert*-butyl (5-methyl-2-oxo-1-tritylindolin-3-ylidene)carbamate **2d** (25.1 mg, 0.050 mmol) by following procedure A. Chromatography purification (7.5:1 hexanes/ethyl acetate) gave 33.4 mg (93%) of a yellow amorphous solid. The dr was determined as 31.5:1 using  $^{19}\text{F}$  NMR. The ee of the major diastereomer was determined as 96% using Phenomenex Amylose-2, hexanes/ethanol 90:10, flow rate = 1 mL/min condition.  $t_{\text{R}}(\text{minor}) = 10.9$  min,  $t_{\text{R}}(\text{major}) = 15.6$  min.  $^1\text{H}$  NMR (400 MHz,  $\text{CDCl}_3$ )  $\delta = 1.36$  (s, 9H), 2.30 (s, 3H), 5.81 (d,  $J = 2.4$  Hz, 1H), 6.05 (d,  $J = 8.3$  Hz, 1H), 6.73 (ddd,  $J = 8.4, 1.8, 0.8$  Hz, 1H), 6.90 – 7.00 (m, 6H), 7.05 (dd,  $J = 7.9, 2.1$  Hz, 1H), 7.14 – 7.18 (m, 9H), 7.29 (dd,  $J = 8.0, 0.9$  Hz, 1H), 7.44 (dd,  $J = 1.9, 1.9$  Hz, 1H), 7.52 (dd,  $J = 1.9, 0.9$  Hz, 1H), 7.69 (ddd,  $J = 8.0, 1.9, 1.0$  Hz, 1H).  $^{13}\text{C}$  NMR (100 MHz,  $\text{CDCl}_3$ )  $\delta = 21.1, 28.2, 66.2$  (d,  $J_{\text{C-F}} = 21.4$  Hz), 75.9, 81.1, 92.7 (d,  $J_{\text{C-F}} = 202.5$  Hz), 114.8 (d,  $J_{\text{C-F}} = 31.9$  Hz), 116.6, 122.2 (d,  $J_{\text{C-F}} = 3.1$  Hz), 123.0 (d,  $J_{\text{C-F}} = 1.7$  Hz), 124.9, 125.7 (d,  $J_{\text{C-F}} = 7.2$  Hz), 127.0, 127.3, 129.7, 129.8 (d,  $J_{\text{C-F}} = 2.1$  Hz), 129.9, 130.1, 132.3, 132.5 (d,  $J_{\text{C-F}} = 23.0$  Hz), 134.3, 141.1, 141.9, 153.9, 172.8.  $^{19}\text{F}$  NMR (376 MHz,  $\text{CDCl}_3$ )  $\delta = -160.9$  (s, major diastereomer),  $-150.4$  (s, minor diastereomer). HRMS (ESI-TOF)  $m/z$ :  $[\text{M}+\text{Na}]^+$  calcd. for  $\text{C}_{41}\text{H}_{35}\text{BrFN}_3\text{NaO}_3$  738.1738, found 738.1741.

*tert*-Butyl ((*R*)-3-((*S*)-(3-chlorophenyl)(cyano)fluoromethyl)-5-ethyl-2-oxo-1-tritylindolin-3-yl)carbamate (**3be**)

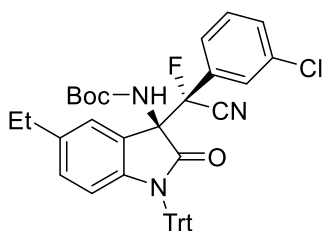

Compound **3be** was obtained from 2-(3-chlorophenyl)-2-fluoroacetonitrile **1b** (9.3 mg, 0.055 mmol) and *tert*-butyl (5-ethyl-2-oxo-1-tritylindolin-3-ylidene)carbamate **2e** (25.8 mg, 0.050 mmol) by following procedure A. Chromatography purification (7.5:1 hexanes/ethyl acetate) gave 29.7 mg (87%) of a yellow amorphous solid. The dr was determined as 34.1:1 using  $^{19}\text{F}$  NMR. The ee of the major diastereomer was determined as 89% using Phenomenex Amylose-2, hexanes/ethanol 90:10, flow rate = 1 mL/min condition.  $t_{\text{R}}(\text{minor}) = 8.1$  min,  $t_{\text{R}}(\text{major}) = 10.3$  min.  $^1\text{H}$  NMR (400

MHz, CDCl<sub>3</sub>)  $\delta$  = 1.23 (t,  $J$  = 7.6 Hz, 3H), 1.34 (s, 9H), 2.68 – 2.51 (m, 2H), 5.82 (d,  $J$  = 2.5 Hz, 1H), 6.07 (d,  $J$  = 8.4 Hz, 1H), 6.75 (dd,  $J$  = 8.5, 2.0 Hz, 1H), 6.91 – 6.99 (m, 6H), 7.01 (dd,  $J$  = 8.4, 2.1 Hz, 1H), 7.12 – 7.19 (m, 9H), 7.24 (dd,  $J$  = 2.0, 2.0 Hz, 1H), 7.34 (dd,  $J$  = 8.0, 7.9 Hz, 1H), 7.52 (dd,  $J$  = 8.1, 2.1 Hz, 1H), 7.55 (d,  $J$  = 1.8 Hz, 1H). <sup>13</sup>C NMR (100 MHz, CDCl<sub>3</sub>)  $\delta$  = 15.4, 28.1, 28.3, 66.1 (d,  $J_{C-F}$  = 21.2 Hz), 75.8, 81.1, 92.8 (d,  $J_{C-F}$  = 202.5 Hz), 114.9 (d,  $J_{C-F}$  = 31.8 Hz), 116.6, 122.2 (d,  $J_{C-F}$  = 2.8 Hz), 123.8, 125.1 (d,  $J_{C-F}$  = 7.6 Hz), 127.0, 127.1, 127.3, 128.7, 129.6 (d,  $J_{C-F}$  = 1.2 Hz), 129.7, 131.3, 132.3 (d,  $J_{C-F}$  = 23.0 Hz), 135.0 (d,  $J_{C-F}$  = 1.7 Hz), 138.7, 141.1, 142.0, 153.8, 172.8. <sup>19</sup>F NMR (376 MHz, CDCl<sub>3</sub>)  $\delta$  = -160.9 (s, major diastereomer), -150.6 (s, minor diastereomer). HRMS (ESI-TOF)  $m/z$ : [M+Na]<sup>+</sup> calcd. for C<sub>42</sub>H<sub>37</sub>ClFN<sub>3</sub>NaO<sub>3</sub> 708.2400, found 708.2402.

*tert*-Butyl ((*R*)-3-((*S*)-cyanofluoro(phenyl)methyl)-6-methoxy-2-oxo-1-tritylindolin-3-yl)carbamate (**3af**)

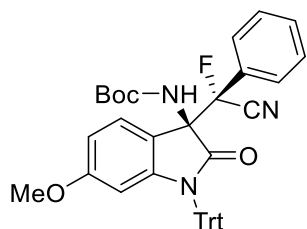

Compound **3af** was obtained from 2-(phenyl)-2-fluoroacetonitrile **1a** (7.4 mg, 0.055 mmol) and *tert*-butyl (6-methoxy-2-oxo-1-tritylindolin-3-ylidene)carbamate **2f** (25.9 mg, 0.050 mmol) by following procedure A. Chromatography purification (7.5:1 hexanes/ethyl acetate) gave 30.7 mg (95%) of a yellow amorphous solid. The dr was determined as 20.0:1 using <sup>19</sup>F NMR. The ee of the major diastereomer was determined as 93% using Phenomenex Amylose-2, hexanes/ethanol 90:10, flow rate = 1 mL/min condition.  $t_R$ (minor) = 11.4 min,  $t_R$ (major) = 14.0 min. <sup>1</sup>H NMR (400 MHz, CDCl<sub>3</sub>)  $\delta$  = 1.36 (s, 9H), 3.43 (s, 3H), 5.69 (d,  $J$  = 2.3 Hz, 1H), 5.86 (d,  $J$  = 2.7 Hz, 1H), 6.53 (dd,  $J$  = 8.4, 2.3 Hz, 1H), 6.89 – 6.97 (m, 6H), 7.09 – 7.19 (m, 9H), 7.24 (dd,  $J$  = 7.4, 1.5 Hz, 2H), 7.44 (dd,  $J$  = 7.8, 7.8 Hz, 2H), 7.56 (dd,  $J$  = 7.5, 7.4 Hz, 1H), 7.61 (d,  $J$  = 8.5 Hz, 1H). <sup>13</sup>C NMR (100 MHz, CDCl<sub>3</sub>)  $\delta$  = 28.1, 55.0, 65.9 (d,  $J_{C-F}$  = 21.5 Hz), 75.8, 80.9, 93.4 (d,  $J_{C-F}$  = 201.8 Hz), 104.5, 107.3, 114.2 (d,  $J_{C-F}$  = 3.4 Hz), 115.3 (d,  $J_{C-F}$  = 32.0 Hz), 125.0, 126.9, 127.0, 127.2, 128.5 (d,  $J_{C-F}$  = 1.4 Hz), 129.8, 130.4 (d,  $J_{C-F}$  = 22.9 Hz), 131.1, 140.9, 145.7, 153.9, 160.0, 173.5

(d,  $J_{C-F} = 1.7$  Hz).  $^{19}\text{F}$  NMR (376 MHz,  $\text{CDCl}_3$ )  $\delta = -160.5$  (s, major diastereomer),  $-150.8$  (s, minor diastereomer). HRMS (ESI-TOF)  $m/z$ :  $[\text{M}+\text{Na}]^+$  calcd. for  $\text{C}_{41}\text{H}_{36}\text{FN}_3\text{NaO}_4$  676.2582, found 676.2584.

*tert*-Butyl ((*R*)-3-((*S*)-cyanofluoro(phenyl)methyl)-6-methyl-2-oxo-1-tritylindolin-3-yl)carbamate (**3ag**)

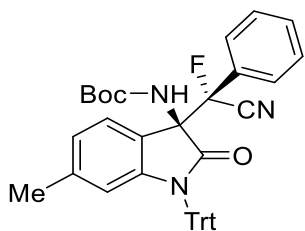

Compound **3ag** was obtained from 2-(phenyl)-2-fluoroacetonitrile **1a** (7.4 mg, 0.055 mmol) and *tert*-butyl (6-methyl-2-oxo-1-tritylindolin-3-ylidene)carbamate **2g** (25.1 mg, 0.050 mmol) by following procedure A. Chromatography purification (7.5:1 hexanes/ethyl acetate) gave 29.8 mg (94%) of a yellow amorphous solid. The dr was determined as 15.0:1 using  $^{19}\text{F}$  NMR. The ee of the major diastereomer was determined as 92% using Phenomenex Amylose-2, hexanes/ethanol 90:10, flow rate = 1 mL/min condition.  $t_{\text{R}}(\text{minor}) = 10.7$  min,  $t_{\text{R}}(\text{major}) = 12.6$  min.  $^1\text{H}$  NMR (400 MHz,  $\text{CDCl}_3$ )  $\delta = 1.35$  (s, 9H), 1.98 (s, 3H), 5.85 (d,  $J = 2.6$  Hz, 1H), 5.88 (s, 1H), 6.82 (dd,  $J = 8.3, 7.8$  Hz, 1H), 6.89 – 6.97 (m, 6H), 7.09 – 7.17 (m, 9H), 7.20 – 7.24 (m, 2H), 7.39 – 7.45 (m, 2H), 7.59 (d,  $J = 7.8$  Hz, 1H).  $^{13}\text{C}$  NMR (100 MHz,  $\text{CDCl}_3$ )  $\delta = 22.2, 28.1, 66.1$  (d,  $J_{C-F} = 21.5$  Hz), 75.7, 80.9, 93.5 (d,  $J_{C-F} = 201.5$  Hz), 115.3 (d,  $J_{C-F} = 31.7$  Hz), 117.6, 119.5 (d,  $J_{C-F} = 3.3$  Hz), 123.4, 124.1, 126.9, 127.2, 128.4 (d,  $J_{C-F} = 1.2$  Hz), 129.3, 129.8, 130.4 (d,  $J_{C-F} = 22.9$  Hz), 131.1, 139.2, 141.1, 144.4, 153.9, 173.3 (d,  $J_{C-F} = 1.4$  Hz).  $^{19}\text{F}$  NMR (376 MHz,  $\text{CDCl}_3$ )  $\delta = -160.5$  (s, major diastereomer),  $-150.8$  (s, minor diastereomer). HRMS (ESI-TOF)  $m/z$ :  $[\text{M}+\text{Na}]^+$  calcd. for  $\text{C}_{41}\text{H}_{36}\text{FN}_3\text{NaO}_3$  660.2633, found 660.2633.

*tert*-Butyl ((*R*)-3-((*S*)-(3-chlorophenyl)(cyano)fluoromethyl)-5-methoxy-2-oxo-1-tritylindolin-3-yl)carbamate (**3bh**)

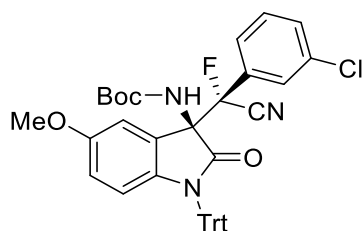

Compound **3bh** was obtained from 2-(3-chlorophenyl)-2-fluoroacetonitrile **1b** (9.3 mg, 0.055 mmol) and *tert*-butyl (5-methoxy-2-oxo-1-tritylindolin-3-ylidene)carbamate **2h** (25.9 mg, 0.050 mmol) by following procedure A. Chromatography purification (7.5:1 hexanes/ethyl acetate) gave 31.5 mg (92%) of a yellow amorphous solid. The dr was determined as 24.4:1 using  $^{19}\text{F}$  NMR. The ee of the major diastereomer was determined as 85% using Phenomenex Amylose-2, hexanes/ethanol 90:10, flow rate = 1 mL/min condition.  $t_{\text{R}}(\text{minor}) = 9.4$  min,  $t_{\text{R}}(\text{major}) = 11.9$  min.  $^1\text{H}$  NMR (400 MHz,  $\text{CDCl}_3$ )  $\delta = 1.37$  (s, 9H), 3.75 (s, 3H), 5.83 (d,  $J = 2.6$  Hz, 1H), 6.07 (d,  $J = 8.9$  Hz, 1H), 6.47 (dd,  $J = 8.9, 2.8$  Hz, 1H), 6.92 – 6.98 (m, 6H), 7.04 (dd,  $J = 8.4, 1.4$  Hz, 1H), 7.12 – 7.20 (m, 9H), 7.31 (d,  $J = 2.7$  Hz, 1H), 7.33 – 7.39 (m, 2H), 7.54 (dd,  $J = 8.1, 2.1$  Hz, 1H).  $^{13}\text{C}$  NMR (100 MHz,  $\text{CDCl}_3$ )  $\delta = 28.1, 55.5, 66.3$  (d,  $J_{\text{C-F}} = 21.3$  Hz), 75.8, 81.2, 92.7 (d,  $J_{\text{C-F}} = 202.6$  Hz), 110.4, 114.7, 114.8 (d,  $J_{\text{C-F}} = 31.9$  Hz), 117.4, 123.4 (d,  $J_{\text{C-F}} = 3.2$  Hz), 125.2 (d,  $J_{\text{C-F}} = 7.1$  Hz), 126.9 (d,  $J_{\text{C-F}} = 9.8$  Hz), 127.1, 127.3, 129.6, 129.7, 131.4, 132.2 (d,  $J_{\text{C-F}} = 23.1$  Hz), 135.2 (d,  $J_{\text{C-F}} = 1.6$  Hz), 137.4, 141.0, 153.8, 155.3, 172.7.  $^{19}\text{F}$  NMR (376 MHz,  $\text{CDCl}_3$ )  $\delta = -160.8$  (s, major diastereomer),  $-150.7$  (s, minor diastereomer). HRMS (ESI-TOF)  $m/z$ :  $[\text{M}+\text{Na}]^+$  calcd. for  $\text{C}_{41}\text{H}_{35}\text{ClFN}_3\text{NaO}_4$  710.2192, found 710.2196.

*tert*-Butyl ((*S*)-3-((*S*)-(cyanofluoro(phenyl)methyl)-2-oxo-1-phenylindolin-3-yl)carbamate (**3ac**)

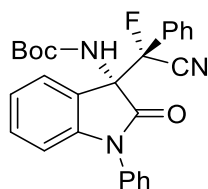

Compound **3ac** was obtained from  $\alpha$ -fluoro benzylnitrile **1a** (14.8 mg, 0.11 mmol) and *tert*-butyl (2-oxo-1-phenylindolin-3-ylidene)carbamate **2c** (32.2 mg, 0.10 mmol) by following procedure B. Chromatography purification (7.5:1 hexanes/ethyl acetate) gave 42.1 mg (92%) of a yellow amorphous solid. The dr was determined as 1:3.0 using  $^{19}\text{F}$  NMR. The ee of the major diastereomer



was determined as 98% using CHIRALPAK IA, hexanes/ethanol 95:5, flow rate = 1 mL/min condition.  $t_R(\text{minor}) = 9.4$  min,  $t_R(\text{major}) = 11.1$  min.  $^1\text{H NMR}$  (400 MHz,  $\text{CDCl}_3$ )  $\delta = 1.34$  (s, 9H), 6.00 (s, 1H), 6.41 (d,  $J = 7.8$  Hz, 1H), 6.85 (dd,  $J = 7.2, 1.8$  Hz, 2H), 7.09 – 7.14 (m, 2H), 7.14 – 7.23 (m, 3H), 7.31 – 7.41 (m, 5H), 7.55 (m, 1H).  $^{13}\text{C NMR}$  (100 MHz,  $\text{CDCl}_3$ )  $\delta = 28.1, 67.7$  (d,  $J_{\text{C-F}} = 22.5$  Hz), 81.6, 93.8 (d,  $J_{\text{C-F}} = 194.3$  Hz), 109.3, 111.3, 114.1 (d,  $J_{\text{C-F}} = 30.9$  Hz), 123.2, 125.5 (d,  $J_{\text{C-F}} = 2.5$  Hz), 126.1, 126.5 (d,  $J_{\text{C-F}} = 5.9$  Hz), 127.9, 128.2, 129.4, 130.6 (d,  $J_{\text{C-F}} = 23.5$  Hz), 130.5, 130.7, 133.5, 144.1, 153.4, 169.2 (d,  $J_{\text{C-F}} = 7.8$  Hz).  $^{19}\text{F NMR}$  (376 MHz,  $\text{CDCl}_3$ )  $\delta = -156.7$  (s, major diastereomer),  $-162.1$  (s, minor diastereomer). Anal. Calcd. for  $\text{C}_{27}\text{H}_{24}\text{FN}_3\text{O}_3$ : C, 70.88; H, 5.29; N, 9.18. Found: C, 70.49; H, 5.66; N, 8.93.

*tert*-Butyl ((*S*)-3-((*S*)-(cyanofluoro(3-chlorophenyl)methyl)-2-oxo-1-phenylindolin-3-yl)carbamate (**3bc**)

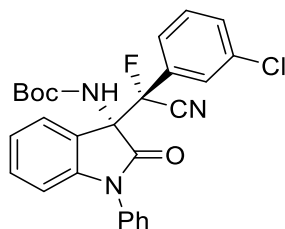

Compound **3bc** was obtained from 2-(3-chlorophenyl)-2-fluoroacetonitrile **1b** (18.6 mg, 0.11 mmol) and (2-oxo-1-phenylindolin-3-ylidene)carbamate **2c** (32.2 mg, 0.10 mmol) by following procedure B. Chromatography purification (7.5:1 hexanes/ethyl acetate) gave 49.0 mg (99%) of a yellow crystalline solid. Mp 177.9-180.2 °C. The dr was determined as 1:5.9 using  $^{19}\text{F NMR}$ . The ee of the major diastereomer was determined as 82% using CHIRALPAK IA, hexanes/ethanol 95:5, flow rate = 1 mL/min condition.  $t_R(\text{minor}) = 8.6$  min,  $t_R(\text{major}) = 10.0$  min.  $^1\text{H NMR}$  (400 MHz,  $\text{CDCl}_3$ )  $\delta = 1.34$  (s, 9H), 6.01 (s, 1H), 6.46 (d,  $J = 7.5$  Hz, 1H), 6.93 (dd,  $J = 7.2, 1.8$  Hz, 2H), 7.04 (dd,  $J = 2.0, 2.0$  Hz, 1H), 7.07 (d,  $J = 8.2$  Hz, 1H), 7.13 (d,  $J = 8.0$  Hz, 1H), 7.16 (d,  $J = 6.5$  Hz, 1H), 7.21 (dd,  $J = 7.7, 7.6$  Hz, 1H), 7.31 – 7.37 (m, 2H), 7.41 (dd,  $J = 8.2, 6.6$  Hz, 2H), 7.54 (dd,  $J = 7.4, 1.9$  Hz, 1H).  $^{13}\text{C NMR}$  (100 MHz,  $\text{CDCl}_3$ )  $\delta = 28.3, 67.6$  (d,  $J_{\text{C-F}} = 22.5$  Hz), 81.6, 81.9, 93.2 (d,  $J_{\text{C-F}} = 195.1$  Hz), 109.6, 113.7 (d,  $J_{\text{C-F}} = 30.8$  Hz), 123.1, 123.6, 125.0 (d,  $J_{\text{C-F}} = 5.9$  Hz), 125.6 (d,  $J_{\text{C-F}} = 2.4$  Hz), 126.2, 126.7 (d,  $J_{\text{C-F}} = 6.5$  Hz), 128.5, 129.3, 129.6, 130.8, 130.9 (d,  $J_{\text{C-F}} = 0.9$  Hz), 131.6 (d,  $J_{\text{C-F}} = 22.8$  Hz), 133.5, 134.3, 144.1, 153.5, 169.2 (d,  $J_{\text{C-F}} = 7.8$

Hz).  $^{19}\text{F}$  NMR (376 MHz,  $\text{CDCl}_3$ )  $\delta = -157.1$  (s, major diastereomer),  $-162.1$  (s, minor diastereomer). Anal. Calcd. for  $\text{C}_{27}\text{H}_{23}\text{ClFN}_3\text{O}_3$ : C, 65.92; H, 4.71; N, 8.54. Found: C, 66.22; H, 5.09; N, 8.19.

*tert*-Butyl ((*S*)-3-((*S*)-(cyanofluoro(3-methoxyphenyl)methyl)-2-oxo-1-phenylindolin-3-yl)carbamate (**3ec**)

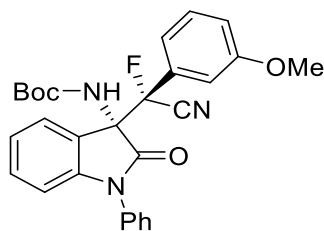

Compound **3ec** was obtained from 2-(3-methoxyphenyl)-2-fluoroacetonitrile **1e** (18.2 mg, 0.11 mmol) and *tert*-butyl (2-oxo-1-phenylindolin-3-ylidene)carbamate **2c** (32.2 mg, 0.10 mmol) by following procedure B. Chromatography purification (7.5:1 hexanes/ethyl acetate) gave 43.5 mg (87%) of a yellow amorphous solid. The dr was determined as 1:3.0 using  $^{19}\text{F}$  NMR. The ee of the major diastereomer was determined as 96% using Phenomenex Amylose-2, hexanes/ethanol 80:20, flow rate = 1 mL/min condition.  $t_{\text{R}}(\text{minor}) = 12.5$  min,  $t_{\text{R}}(\text{major}) = 13.8$  min.  $^1\text{H}$  NMR (400 MHz,  $\text{CDCl}_3$ )  $\delta = 1.33$  (m, 9H), 3.46 (s, 3H), 6.01 (s, 1H), 6.43 – 6.50 (m, 2H), 6.78 (d,  $J = 7.3$  Hz, 1H), 6.82 (d,  $J = 7.7$  Hz, 1H), 6.91 – 6.85 (m, 2H), 7.10 (d,  $J = 8.1$  Hz, 1H), 7.15 (dd,  $J = 7.5, 1.2$  Hz, 1H), 7.20 (dd,  $J = 7.7, 7.5$  Hz, 1H), 7.34 (dd,  $J = 7.2, 5.7$  Hz, 1H), 7.39 (dd,  $J = 7.4, 6.4$  Hz, 2H), 7.54 (d,  $J = 7.2$  Hz, 1H).  $^{13}\text{C}$  NMR (100 MHz,  $\text{CDCl}_3$ )  $\delta = 28.1, 55.2, 67.7$  (d,  $J_{\text{C-F}} = 22.6$  Hz), 81.6, 93.6 (d,  $J_{\text{C-F}} = 194.7$  Hz), 109.4, 110.5 (d,  $J_{\text{C-F}} = 6.5$  Hz), 114.0 (d,  $J_{\text{C-F}} = 31.0$  Hz), 117.7, 119.1 (d,  $J_{\text{C-F}} = 5.7$  Hz), 123.1, 124.7, 125.4 (d,  $J_{\text{C-F}} = 2.5$  Hz), 126.1, 128.2, 129.0, 129.4, 130.4, 130.7 (d,  $J_{\text{C-F}} = 22.2$  Hz), 133.5, 144.2, 153.4, 158.9, 169.2 (d,  $J_{\text{C-F}} = 7.8$  Hz).  $^{19}\text{F}$  NMR (376 MHz,  $\text{CDCl}_3$ )  $\delta = -156.3$  (s, major diastereomer),  $-161.6$  (s, minor diastereomer). Anal. Calcd. for  $\text{C}_{28}\text{H}_{26}\text{FN}_3\text{O}_4$ : C, 68.98; H, 5.38; N, 8.62. Found: C, 68.79; H, 5.78; N, 8.22.

*tert*-Butyl ((*S*)-3-((*S*)-(cyanofluoro(3,5-dimethoxyphenyl)methyl)-2-oxo-1-phenylindolin-3-yl)carbamate (**3ic**)

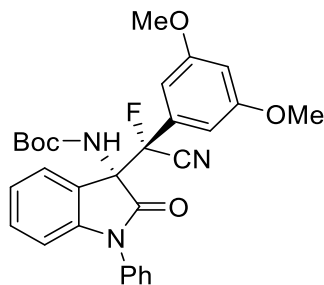

Compound **3ic** was obtained from 2-(3,5-dimethoxyphenyl)-2-fluoroacetonitrile **1i** (21.4 mg, 0.10 mmol) and *tert*-butyl (2-oxo-1-phenylindolin-3-ylidene)carbamate **2c** (32.2 mg, 0.10 mmol) by following procedure B. Chromatography purification (7.5:1 hexanes/ethyl acetate) gave 43.5 mg (84%) of an off-white crystalline solid. Mp 187.2-189.4 °C. The dr was determined as 1:5.3 using  $^{19}\text{F}$  NMR. The ee of the major diastereomer was determined as 90% using CHIRALPAK IA, hexanes/ethanol 95:5, flow rate = 1 mL/min condition.  $t_{\text{R}}(\text{minor}) = 10.8$  min,  $t_{\text{R}}(\text{major}) = 14.5$  min.  $^1\text{H}$  NMR (400 MHz,  $\text{CDCl}_3$ )  $\delta = 1.34$  (s, 9H), 3.48 (s, 6H), 5.97 (s, 1H), 6.20 (d,  $J = 2.2$  Hz, 2H), 6.41 (dd,  $J = 2.3, 2.3$  Hz, 1H), 6.49 (d,  $J = 7.8$  Hz, 1H), 6.94 (d,  $J = 7.3$  Hz, 2H), 7.14 (dd,  $J = 7.4, 7.4$  Hz, 1H), 7.20 (dd,  $J = 7.7, 7.2$  Hz, 1H), 7.34 (d,  $J = 7.4$  Hz, 1H), 7.40 (dd,  $J = 7.5, 7.4$  Hz, 2H), 7.52 (dd,  $J = 7.4, 1.8$  Hz, 1H).  $^{13}\text{C}$  NMR (100 MHz,  $\text{CDCl}_3$ )  $\delta = 28.1, 55.4, 67.7$  (d,  $J_{\text{C-F}} = 22.6$  Hz), 81.6, 93.5 (d,  $J_{\text{C-F}} = 195.1$  Hz), 103.7, 104.2 (d,  $J_{\text{C-F}} = 6.3$  Hz), 109.5, 114.0 (d,  $J_{\text{C-F}} = 30.9$  Hz), 123.1, 124.6, 125.3 (d,  $J_{\text{C-F}} = 2.3$  Hz), 126.0, 128.2, 129.3, 130.4, 131.3 (d,  $J_{\text{C-F}} = 22.5$  Hz), 133.5, 144.2, 153.4, 160.1, 169.2 (d,  $J_{\text{C-F}} = 7.8$  Hz).  $^{19}\text{F}$  NMR (376 MHz,  $\text{CDCl}_3$ )  $\delta = -156.4$  (s, major diastereomer),  $-161.3$  (s, minor diastereomer). Anal. Calcd. for  $\text{C}_{29}\text{H}_{28}\text{FN}_3\text{O}_5$ : C, 67.30; H, 5.45; N, 8.12. Found: C, 67.34; H, 5.60; N, 7.89.

*tert*-Butyl ((*S*)-3-((*S*)-(cyanofluoro(2-naphthyl)methyl)-2-oxo-1-phenylindolin-3-yl)carbamate (**3kc**)

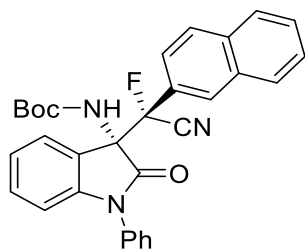

Compound **3kc** was obtained from 2-(2-naphthyl)-2-fluoroacetonitrile **1k** (20.4 mg, 0.11 mmol) and *tert*-butyl (2-oxo-1-phenylindolin-3-ylidene)carbamate **2c** (32.2 mg, 0.10 mmol) by following procedure B. Chromatography purification (7:1 hexanes/ethyl acetate) gave 46.7 mg (92%) of a white amorphous solid. The dr was determined as 1:6.7 using  $^{19}\text{F}$  NMR. The ee of the major diastereomer was determined as 88% using CHIRALPAK IA, hexanes/ethanol 95:5, flow rate = 1 mL/min condition.  $t_{\text{R}}(\text{minor}) = 11.4$  min,  $t_{\text{R}}(\text{major}) = 15.1$  min.  $^1\text{H}$  NMR (400 MHz,  $\text{CDCl}_3$ )  $\delta = 1.35$  (s, 9H), 6.05 (s, 1H), 6.27 (dd,  $J = 6.5, 2.2$  Hz, 1H), 6.57 (d,  $J = 6.7$  Hz, 2H), 7.09 (dd,  $J = 8.7, 2.0$  Hz, 1H), 7.12 – 7.17 (m, 2H), 7.17 – 7.24 (m, 3H), 7.47 (dd,  $J = 8.2, 6.9$  Hz, 1H), 7.55 (dd,  $J = 8.2, 6.9$  Hz, 1H), 7.60 (dd,  $J = 7.5, 3.1$  Hz, 2H), 7.65 (m, 2H), 7.78 (d,  $J = 8.1$  Hz, 1H).  $^{13}\text{C}$  NMR (100 MHz,  $\text{CDCl}_3$ )  $\delta = 28.1, 67.8$  (d,  $J_{\text{C-F}} = 22.8$  Hz), 81.6, 94.0 (d,  $J_{\text{C-F}} = 194.3$  Hz), 109.4, 114.2 (d,  $J_{\text{C-F}} = 30.9$  Hz), 122.5 (d,  $J_{\text{C-F}} = 5.8$  Hz), 123.2, 123.4 (d,  $J_{\text{C-F}} = 3.6$  Hz), 124.9, 125.5 (d,  $J_{\text{C-F}} = 2.3$  Hz), 126.0, 126.6, 126.8, 126.9, 127.1 (d,  $J_{\text{C-F}} = 6.0$  Hz), 127.5, 127.8, 128.1, 128.6, 129.2, 130.4, 131.9, 133.3, 133.7, 144.1, 153.4, 169.3 (d,  $J_{\text{C-F}} = 7.7$  Hz).  $^{19}\text{F}$  NMR (376 MHz,  $\text{CDCl}_3$ )  $\delta = -156.2$  (s, major diastereomer),  $-161.6$  (s, minor diastereomer). Anal. Calcd. for  $\text{C}_{31}\text{H}_{26}\text{FN}_3\text{O}_3$ : C, 73.36; H, 5.16; N, 8.28. Found: C, 72.98; H, 5.48; N, 7.91.

*tert*-Butyl ((*S*)-3-((*R*)-1-cyano-1-phenylethyl)-2-oxo-1-tritylindolin-3-yl)carbamate (**9**)

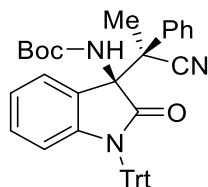

Compound **9** was obtained from  $\alpha$ -methylphenylacetonitrile **8** (10.2 mg, 0.055 mmol) and *tert*-butyl (2-oxo-1-tritylindolin-3-ylidene)carbamate **2b** (24.4 mg, 0.050 mmol) by following procedure A. Chromatographic purification (6.5:1 hexanes/ethyl acetate) gave 30.4 mg (98%) of a pale yellow crystalline solid. Mp 114.5-117.4 °C. The dr was determined as >19:1 using  $^1\text{H}$  NMR. The ee of the major diastereomer was determined as 85% using CHIRALPAK IA, hexanes/ethanol 98:2, flow rate = 1 mL/min condition.  $t_{\text{R}}(\text{major}) = 6.2$  min,  $t_{\text{R}}(\text{minor}) = 8.2$  min.  $^1\text{H}$  NMR (400 MHz,  $\text{CDCl}_3$ )  $\delta = 1.34$  (s, 9H), 1.99 (s, 3H), 5.47 (s, 1H), 6.07 (d,  $J = 8.1$  Hz, 1H), 6.83 (ddd,  $J = 7.9, 7.8, 1.4$  Hz, 1H), 6.95 (ddd,  $J = 7.7, 7.6, 1.0$  Hz, 1H), 7.01 – 7.09 (m, 6H), 7.10 – 7.19 (m, 9H), 7.22 (dd,  $J = 8.3, 1.4$  Hz, 2H), 7.31 (dd,  $J = 7.7, 7.6$  Hz, 2H), 7.42 (dd,  $J = 7.3, 7.4$  Hz, 1H),

7.57 (d,  $J = 7.5$  Hz, 1H).  $^{13}\text{C}$  NMR (100 MHz,  $\text{CDCl}_3$ )  $\delta = 19.9, 28.3, 48.2, 64.2, 75.8, 80.7, 116.2, 121.7, 122.1, 124.4, 126.5, 127.0, 127.3, 128.3, 128.5, 129.0, 129.4, 130.1, 134.2, 141.4, 144.2, 153.4, 174.4$ . Anal. Calcd. for  $\text{C}_{41}\text{H}_{37}\text{N}_3\text{O}_3$ : C, 79.46; H, 6.02; N, 6.78. Found: C, 79.30; H, 6.28; N, 6.54.

### 3.4 Reduction of an $\alpha$ -fluoro $\beta$ -aminonitrile to an $\beta$ -fluoro $\alpha,\gamma$ -diamine

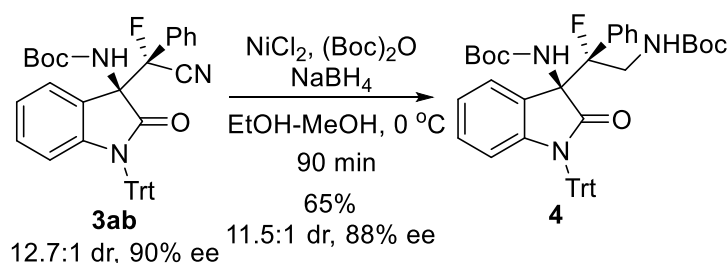

A solution of compound **3ab** (62.3 mg, 0.10 mmol),  $\text{NiCl}_2$  (13.0 mg, 0.10 mmol),  $(\text{Boc})_2\text{O}$  (43.7 mg, 0.20 mmol) in methanol (2.0 mL) was stirred at  $0\text{ }^\circ\text{C}$ . Then,  $\text{NaBH}_4$  (45.4 mg, 1.20 mmol) in ethanol (2.0 mL) was added in two portions (1.0 mL each). The reaction was stirred at  $0\text{ }^\circ\text{C}$  for 90 minutes and quenched with a saturated solution of  $\text{NH}_4\text{Cl}$  (1.0 mL). The reaction mixture was poured onto brine (15 mL) and extracted with  $\text{EtOAc}$  (4 mL, 3 times). The ethyl acetate layers were combined, dried over  $\text{MgSO}_4$ , filtrated, and concentrated under reduced pressure. The residue was purified by flash chromatography (80:14:6 hexanes/ $\text{EtOAc}/\text{CH}_2\text{Cl}_2$ ) to give compound **4** (47.5 mg, 0.065 mmol) in 65% yield as a white amorphous solid. The dr was determined as 11.5:1 using  $^{19}\text{F}$  NMR. The ee of the major diastereomer was determined as 88% using CHIRALPAK IA, hexanes/isopropanol 95:5, flow rate = 1 mL/min condition.  $t_{\text{R}}(\text{major}) = 10.3$  min,  $t_{\text{R}}(\text{minor}) = 15.6$  min.  $^1\text{H}$  NMR (400 MHz,  $\text{CDCl}_3$ )  $\delta = 1.26$  (s, 9H), 1.28 (s, 9H), 4.22 (m, 1H), 4.35 (m, 1H), 4.43 (bs, 1H), 5.73 (d,  $J = 3.2$  Hz, 1H), 6.17 (d,  $J = 8.2$  Hz, 1H), 6.87 (dd,  $J = 8.1, 7.7$  Hz, 1H), 6.94 (dd,  $J = 7.5, 6.9$  Hz, 1H), 7.03 – 6.97 (m, 6H), 7.15 – 7.07 (m, 11H), 7.32 (d,  $J = 7.2$  Hz, 1H), 7.32 – 7.44 (m, 3H).  $^{13}\text{C}$  NMR (100 MHz,  $\text{CDCl}_3$ )  $\delta = 28.3, 28.4, 44.2$  (d,  $J_{\text{C-F}} = 19.3$  Hz), 67.0 (d,  $J_{\text{C-F}} = 20.7$  Hz), 75.5, 79.8, 80.4, 100.5 (d,  $J_{\text{C-F}} = 192.0$  Hz), 116.4, 122.2, 124.4, 125.5 (d,  $J_{\text{C-F}} = 3.9$  Hz), 126.8, 127.3, 127.6, 128.2 (d,  $J_{\text{C-F}} = 10.3$  Hz), 129.4, 129.8, 130.0, 134.5 (d,  $J_{\text{C-F}} = 22.3$  Hz), 141.6, 144.7, 154.5, 155.8, 176.0.  $^{19}\text{F}$  NMR (376 MHz,  $\text{CDCl}_3$ )  $\delta = -174.7$  (m, minor diastereomer),

-173.2 (m, major diastereomer). HRMS (ESI-TOF)  $m/z$ :  $[M+H]^+$  calcd. for  $C_{45}H_{47}FN_3O_5$  728.3500, found 728.3496.

### 3.5 Partial nitrile hydrolysis

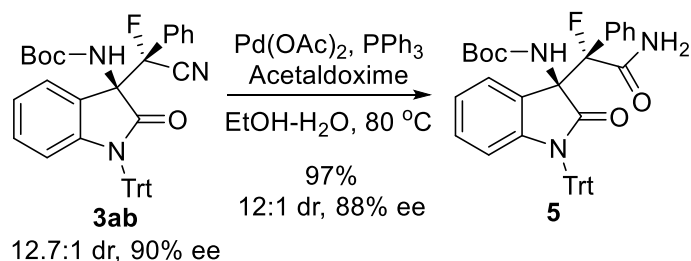

A mixture of compound **3ab** (62.3 mg, 0.10 mmol), acetaldoxime (29.2 mg, 0.40 mmol),  $Pd(OAc)_2$  (3.4 mg, 0.015 mmol),  $PPh_3$  (7.9 mg, 0.030 mmol) in ethanol-water (1.2 mL, 8:1) was heated to  $80\text{ }^\circ C$  and stirred for 18 hours. Upon completion, the reaction mixture was poured onto aqueous  $NH_4Cl$  solution (15 mL) and extracted with EtOAc (4 mL, 3 times). The ethyl acetate layers were combined, dried over  $MgSO_4$ , filtered, and concentrated under reduced pressure. The residue was purified by column chromatography (5:1 hexanes/EtOAc) to give compound **5** (62.0 mg, 0.097 mmol) in 97% yield as an off-white crystalline solid. Mp  $176.3\text{-}179.7\text{ }^\circ C$ . The dr was determined as 12.0:1 using  $^{19}F$  NMR. The ee of the major diastereomer was determined as 88% using Phenomenex Amylose-2, hexanes/ethanol 93:7, flow rate = 1 mL/min condition.  $t_R(\text{major}) = 12.9$  min,  $t_R(\text{minor}) = 21.6$  min.  $^1H$  NMR (400 MHz,  $CDCl_3$ )  $\delta = 1.27$  (s, 9H), 5.52 (d,  $J = 7.1$  Hz, 1H), 5.97 (dd,  $J = 7.6, 1.5$  Hz, 1H), 6.10 (bs, 1H), 6.25 (d,  $J = 8.2$  Hz, 1H), 6.57 (dd,  $J = 7.6, 7.6$  Hz, 1H), 6.84 (ddd,  $J = 7.9, 7.9, 1.4$  Hz, 1H), 7.14 – 7.24 (m, 9H), 7.35 (dd,  $J = 7.7, 6.8$  Hz, 2H), 7.41 (dd,  $J = 7.7, 7.3$  Hz, 1H), 7.46 – 7.52 (m, 2H), 7.51 – 7.56 (m, 6H), 7.69 (s, 1H).  $^{13}C$  NMR (100 MHz,  $CDCl_3$ )  $\delta = 28.1, 67.1$  (d,  $J_{C-F} = 31.9$  Hz), 75.0, 80.1, 95.1 (d,  $J_{C-F} = 194.4$  Hz), 115.1, 120.9, 125.1 (d,  $J_{C-F} = 4.9$  Hz), 126.44 (d,  $J_{C-F} = 12.1$  Hz), 126.7, 127.3, 127.4, 127.7 (d,  $J_{C-F} = 2.5$  Hz), 127.9, 129.3, 129.5, 133.0 (d,  $J_{C-F} = 21.4$  Hz), 142.0, 144.7, 154.8, 171.3 (d,  $J_{C-F} = 21.4$  Hz), 175.1 (d,  $J_{C-F} = 1.8$  Hz).  $^{19}F$  NMR (376 MHz,  $CDCl_3$ )  $\delta = -165.9$  (s, major diastereomer),  $-160.2$  (s, minor diastereomer). HRMS (ESI-TOF)  $m/z$ :  $[M+Na]^+$  calcd. for  $C_{40}H_{36}FN_3NaO_4$  664.2582, found 664.2583.

### 3.6 Oxindole lactam ring opening

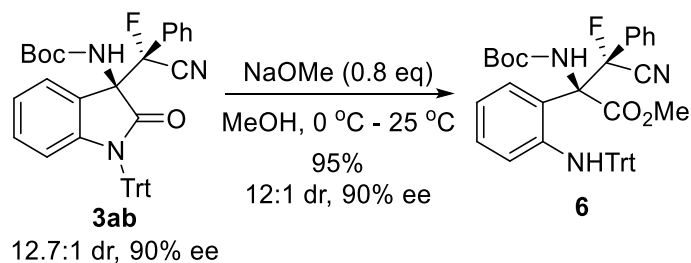

To a solution of compound **3ab** (62.3 mg, 0.10 mmol) in anhydrous methanol (2.0 mL) was added sodium methoxide (4.3 mg, 0.08 mmol) at 0 °C. The reaction was stirred for 18 hours and allowed to warm to room temperature. Upon completion, the reaction mixture was poured onto aqueous NH<sub>4</sub>Cl solution (15 mL) and extracted with EtOAc (4 mL, 3 times). The ethyl acetate layers were combined, dried over MgSO<sub>4</sub>, filtrated, and concentrated under reduced pressure. The residue was purified by column chromatography (5:1 hexanes/EtOAc) to give compound **6** (66.1 mg, 0.10 mmol) in 95% yield as an off-white crystalline solid. Mp 137.6-140.3 °C. The dr was determined as 12.0:1 using <sup>19</sup>F NMR. The ee of the major diastereomer was determined as 91% using Phenomenex Amylose-2, hexanes/ethanol 90:10, flow rate = 1 mL/min condition. *t<sub>R</sub>*(minor) = 7.9 min, *t<sub>R</sub>*(major) = 9.0 min. <sup>1</sup>H NMR (400 MHz, CDCl<sub>3</sub>) δ = 1.14 (s, 9H), 3.95 (s, 3H), 6.23 – 6.49 (m, 2H), 6.65 (dd, *J* = 6.1, 6.1 Hz, 1H), 6.86 (ddd, *J* = 7.9, 7.8, 1.4 Hz, 1H), 7.14 – 7.18 (m, 3H), 7.19 (s, 1H), 7.20 – 7.25 (m, 6H), 7.30 – 7.48 (m, 9H), 7.52 (dd, *J* = 6.2, 6.1, 2H), 8.01 (s, 1H). <sup>13</sup>C NMR (100 MHz, CDCl<sub>3</sub>) δ = 28.1, 54.7, 67.2 (d, *J*<sub>C-F</sub> = 31.0 Hz), 75.0, 80.4, 95.6 (d, *J*<sub>C-F</sub> = 176.3 Hz), 115.2 (d, *J*<sub>C-F</sub> = 34.5 Hz), 115.5, 121.0, 125.3, 125.8, 126.7 (d, *J*<sub>C-F</sub> = 11.6 Hz), 126.8, 127.4, 127.6, 128.0 (d, *J*<sub>C-F</sub> = 8.8 Hz), 129.6, 130.0, 134.0 (d, *J*<sub>C-F</sub> = 21.9 Hz), 142.1, 144.9, 154.3, 166.4 (d, *J*<sub>C-F</sub> = 31.4 Hz). <sup>19</sup>F NMR (376 MHz, CDCl<sub>3</sub>) δ = -153.0 (s, minor diastereomer), -158.5 (s, major diastereomer). HRMS (ESI-TOF) *m/z*: [M+H]<sup>+</sup> calcd. for C<sub>41</sub>H<sub>39</sub>FN<sub>3</sub>O<sub>4</sub> 656.2919, found 656.2921.

### 3.7 Deprotection of **3ab**

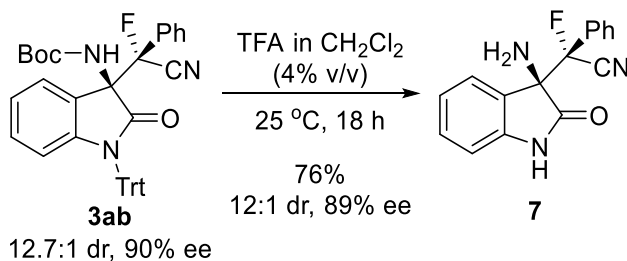

To a solution of **3ab** (65.7 mg, 0.10 mmol) in dichloromethane (5 mL) was added trifluoroacetic acid (200  $\mu$ L). The reaction mixture was stirred at room temperature for 18 hours, poured onto a saturated solution of sodium bicarbonate (30 mL) and extracted with dichloromethane (5 mL, 3 times). The organic layers were combined, dried over Na<sub>2</sub>SO<sub>4</sub>, filtrated, and concentrated under reduced pressure. The residue was purified by column chromatography (4.5:3.5:2 hexanes/EtOAc/dichloromethane) to give compound **7** (22.6 mg, 0.08 mmol) in 76% yield as a pale yellow crystalline solid. Mp 174.6-176.8 °C. The dr was determined as 12.0:1 using <sup>19</sup>F NMR. The ee of the major diastereomer was determined as 89% using Phenomenex Amylose-2, hexanes/ethanol 90:10, flow rate = 1 mL/min condition.  $t_R(\text{major}) = 14.5$  min,  $t_R(\text{minor}) = 17.8$  min. <sup>1</sup>H NMR (400 MHz, CDCl<sub>3</sub>)  $\delta = 2.32$  (bs, 2H), 6.69 (d,  $J = 7.8$  Hz, 1H), 7.07 (ddd,  $J = 7.6, 7.5, 1.0$  Hz, 1H), 7.18 – 7.24 (m, 3H), 7.26 (m, 1H), 7.30 (ddd,  $J = 7.8, 7.7, 1.3$  Hz, 1H), 7.36 (ddd,  $J = 6.9, 6.9, 1.5$  Hz, 2H), 7.52 (bs, 1H). <sup>13</sup>C NMR (100 MHz, CDCl<sub>3</sub>)  $\delta = 65.9$  (d,  $J_{C-F} = 25.0$  Hz), 94.8 (d,  $J_{C-F} = 197.5$  Hz), 110.1, 115.7 (d,  $J_{C-F} = 31.5$  Hz), 123.0, 125.0 (d,  $J_{C-F} = 3.1$  Hz), 126.0 (d,  $J_{C-F} = 7.4$  Hz), 126.1, 127.9, 130.2 (d,  $J_{C-F} = 0.9$  Hz), 131.0, 140.8, 176.0. <sup>19</sup>F NMR (376 MHz, CDCl<sub>3</sub>)  $\delta = -160.3$  (s, minor diastereomer), -164.1 (s, major diastereomer). Anal. Calcd. for C<sub>16</sub>H<sub>12</sub>FN<sub>3</sub>O: C, 68.32; H, 4.30; N, 14.94. Found: C, 68.50; H, 4.68; N, 14.69.



## 4. Mechanistic Studies

### $^1\text{H}$ NMR analysis of the binding of **1a** to Cu(I)-DTBM-Segphos complex.

Addition of one equivalent of  $\alpha$ -fluorobenzyl nitrile **1a** into a benzene- $d_6$  solution of Cu(I)-biphosphine complex prepared *in situ* from  $\text{Cu}(\text{MeCN})_4\text{PF}_6$  and (*R*)-DTBM-Segphos (1:1) led to the downfield shifting of the  $\alpha$ -fluorobenzyl nitrile  $\alpha$ -proton, indicating the coordination of **1a** to the Cu(I) complex. Mixing of **1a**, the *N*-methyl isatin derived ketimine **2d**, and Cu(I)-DTBM-Segphos complex (1:1:1) in benzene- $d_6$  gave the same extent of downfield shifting for the **1a**  $\alpha$ -proton, while changes of the ketimine signals were negligible. This suggests that the **1a** preferably binds to the Cu(I)-DTBM-Segphos complex in the presence of the ketimine.

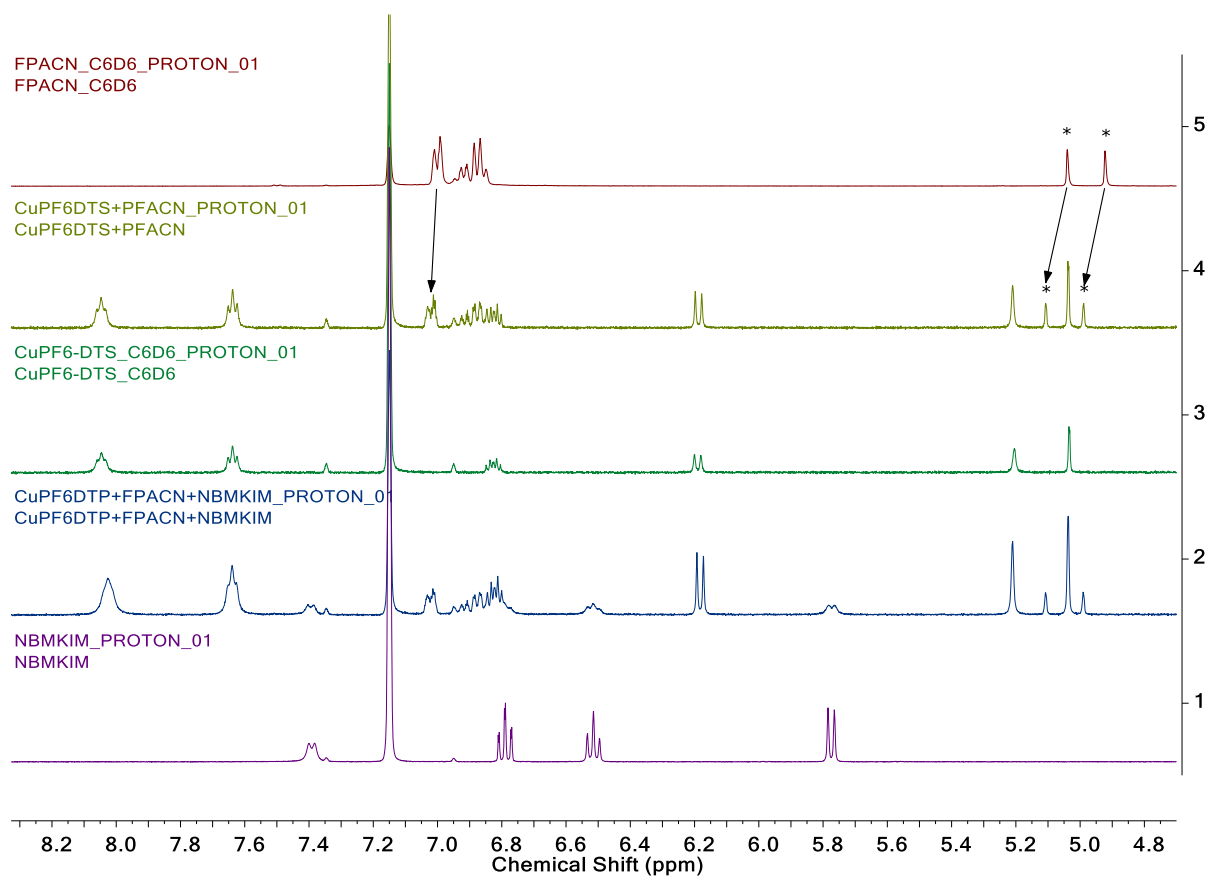

All  $^1\text{H}$  NMR spectra were obtained in benzene- $d_6$ . From bottom to top: Stack 1: *N*-methyl isatin derived ketimine **2d**. Stack 2:  $\alpha$ -fluorobenzyl nitrile **1a** + Cu(I)-DTBM-Segphos complex + *N*-methyl isatin derived ketimine **2d** (1:1:1). Stack 3: Cu(I)-DTBM-Segphos complex. Stack 4:  $\alpha$ -fluorobenzyl nitrile **1a** and Cu(I)-DTBM-Segphos complex (1:1). Stack 5:  $\alpha$ -fluorobenzyl nitrile **1a**.

**$^{19}\text{F}$  NMR analysis of the cooperative Cu(I)complex/base catalyzed H/D exchange of  $\alpha$ -fluorobenzyl nitrile **1a**.**

In the presence of 20 mol% of BTMG, the H/D exchange of the  $\alpha$ -proton in  $\alpha$ -fluorobenzyl nitrile **1a** in the presence of one equivalent of methanol- $d_4$  was slow. The ratio of the deuterated vs. protonated **1a** species increased from 1:6 to 1:2 after 60 minutes and stagnated at 1:2 after 18 hours. When 20 mol% of Cu(I)-DTBM-Segphos complex and BTMG were used to facilitate the H/D exchange between **1a** and methanol- $d_4$ , the integration ratio of the deuterated vs. protonated **1a** species reached a 1:1.5 ratio within 5 minutes. Adding another equivalent of  $\text{CH}_3\text{OH}$  into this mixture decreased the integration ratio of the deuterated vs. protonated **1a** species to 1:2.5 within 5 minutes.

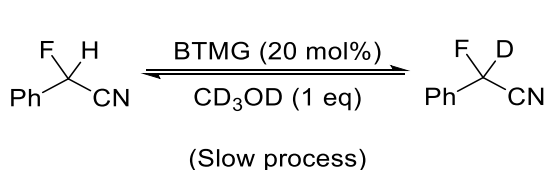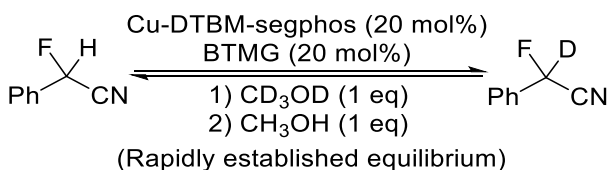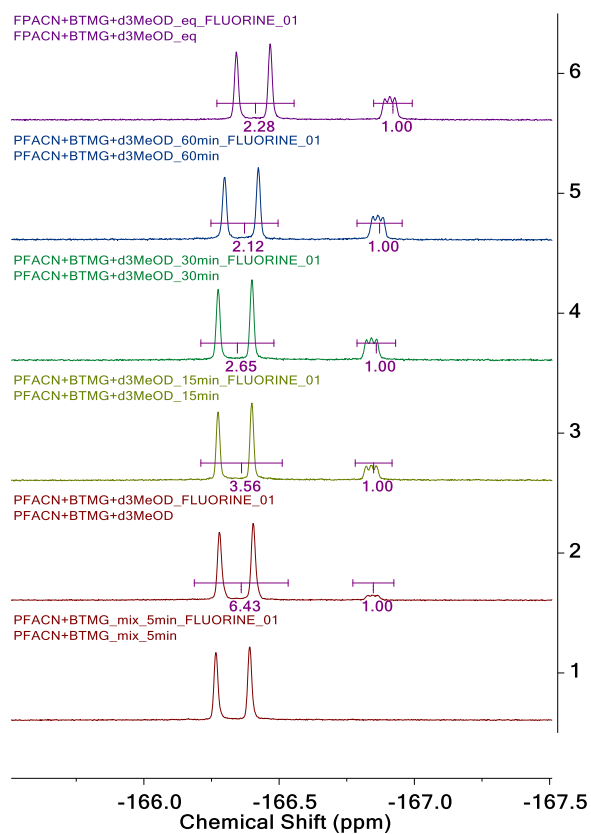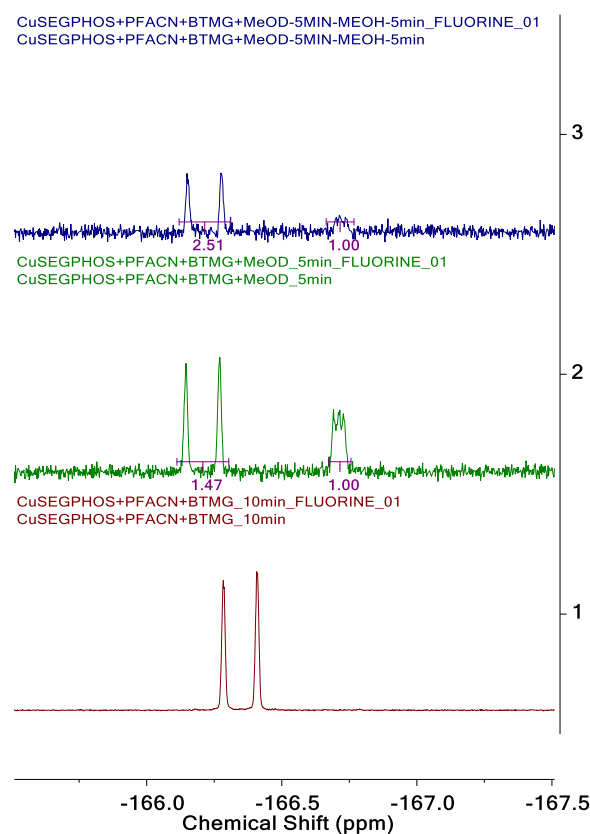

All  $^{19}\text{F}$  NMR spectra were obtained in benzene- $\text{d}_6$ . Left: H/D exchange in the presence of 20 mol% BTMG. From bottom to top: Stack 1:  $\alpha$ -fluorobenzyl nitrile **1a**. Stack 2:  $\alpha$ -fluorobenzyl nitrile **1a** +  $\text{CD}_3\text{OD}$  after 5 minutes (H:D = 6.43:1). Stack 3:  $\alpha$ -fluorobenzyl nitrile **1a** +  $\text{CD}_3\text{OD}$  after 15 minutes (H:D = 3.58:1). Stack 4:  $\alpha$ -fluorobenzyl nitrile **1a** +  $\text{CD}_3\text{OD}$  after 30 minutes (H:D = 2.65:1). Stack 5:  $\alpha$ -fluorobenzyl nitrile **1a** +  $\text{CD}_3\text{OD}$  after 60 minutes (H:D = 2.12:1). Stack 6:  $\alpha$ -fluorobenzyl nitrile **1a** +  $\text{CD}_3\text{OD}$  after 18 hours (H:D = 2.26:1). Right: H/D exchange in the presence of 20 mol% BTMG and Cu(I)-DTBM-Segphos complex. From bottom to top: Stack 1:  $\alpha$ -fluorobenzyl nitrile **1a**. Stack 2: 5 minutes after addition of 1 eq of  $\text{CD}_3\text{OD}$  (H:D = 1.47:1). Stack 3: 5 minutes after addition of 1 eq of  $\text{CH}_3\text{OH}$  into the reaction mixture of Stack 2 (H:D = 2.51:1).

## 5. $^1\text{H}$ , $^{13}\text{C}$ , $^{19}\text{F}$ NMR Spectra

Methyl 4-(cyanofluoromethyl)benzoate (**1f**)

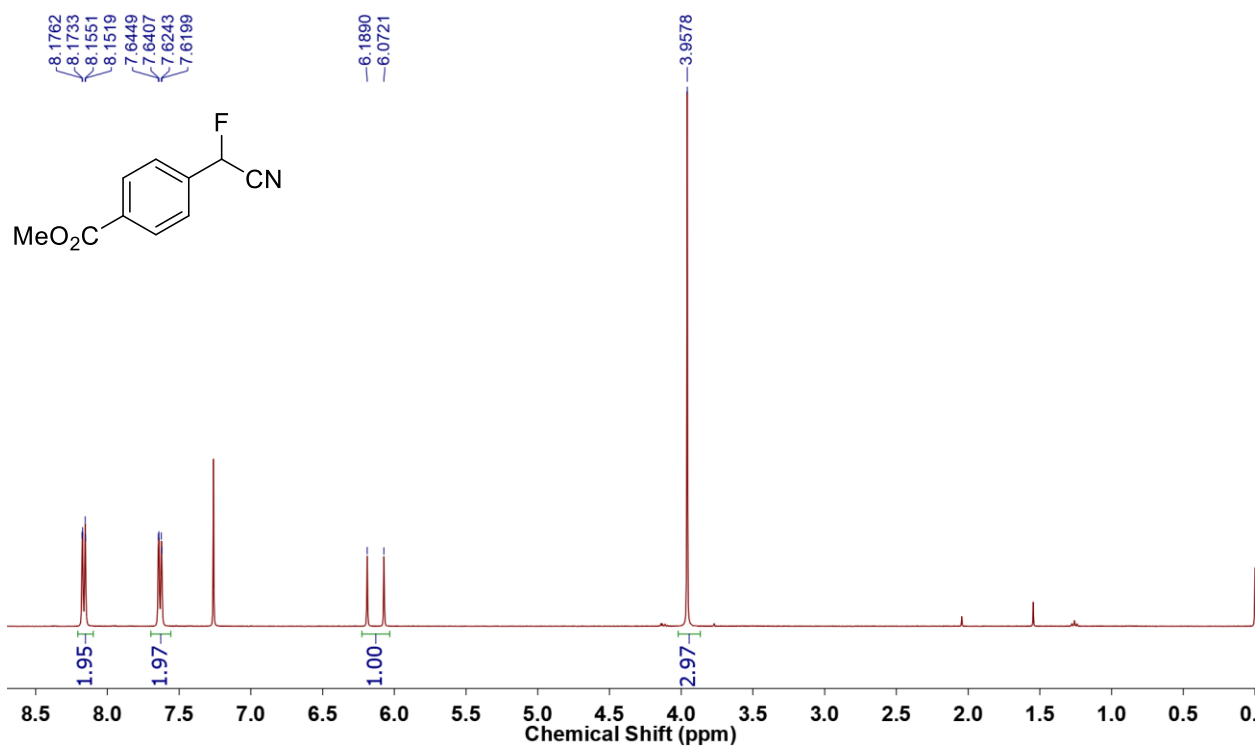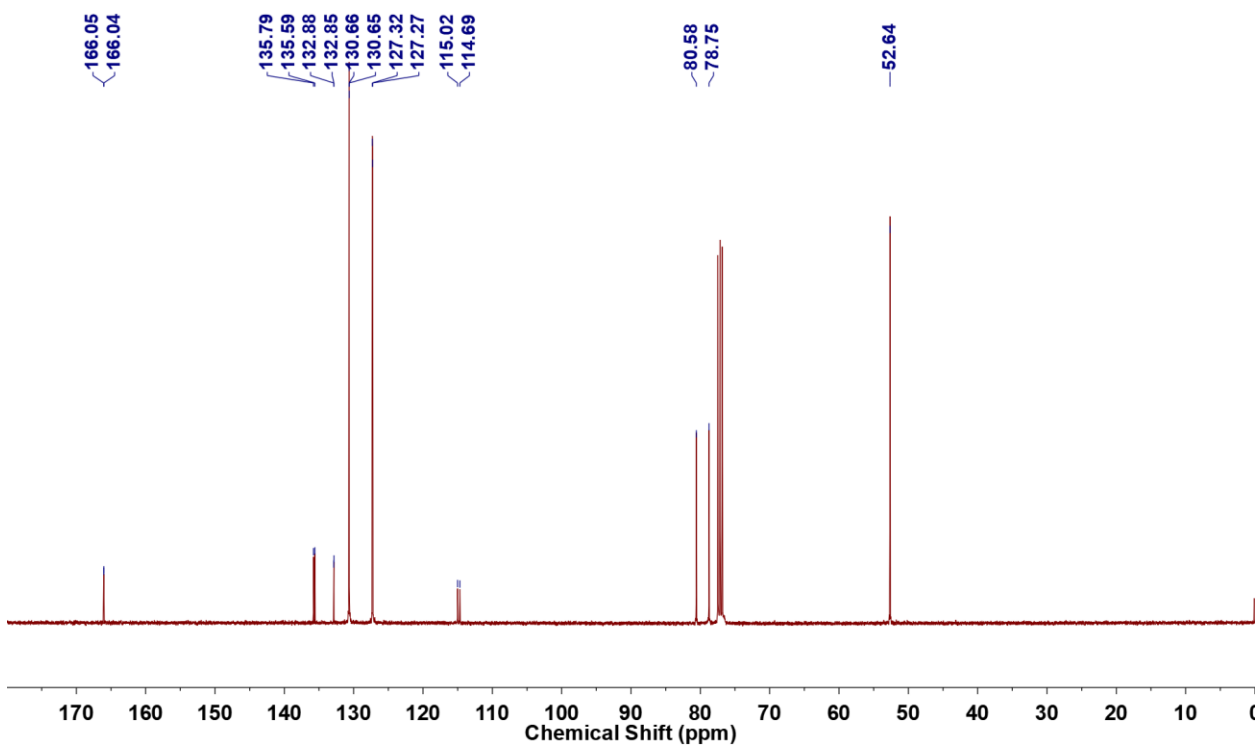

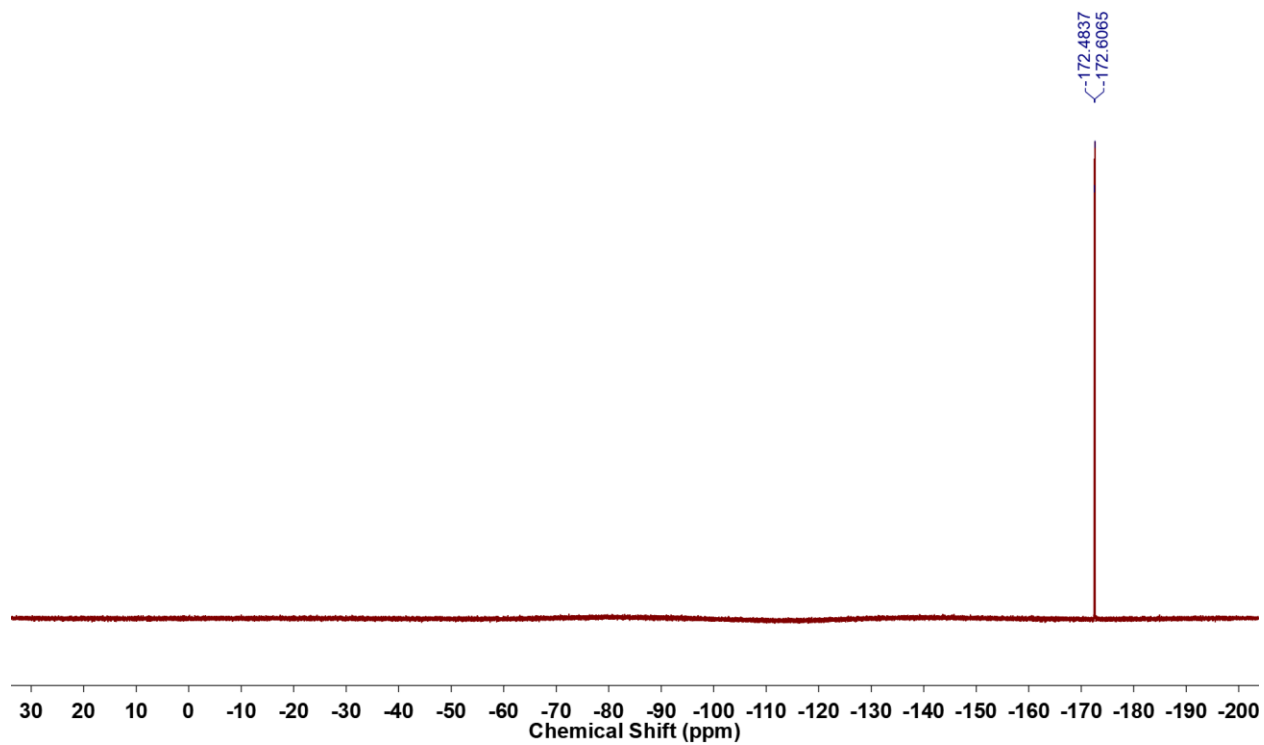

2-Fluoro-2-(3-nitrophenyl)acetonitrile (**1g**)

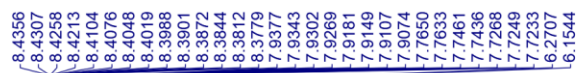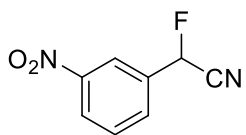

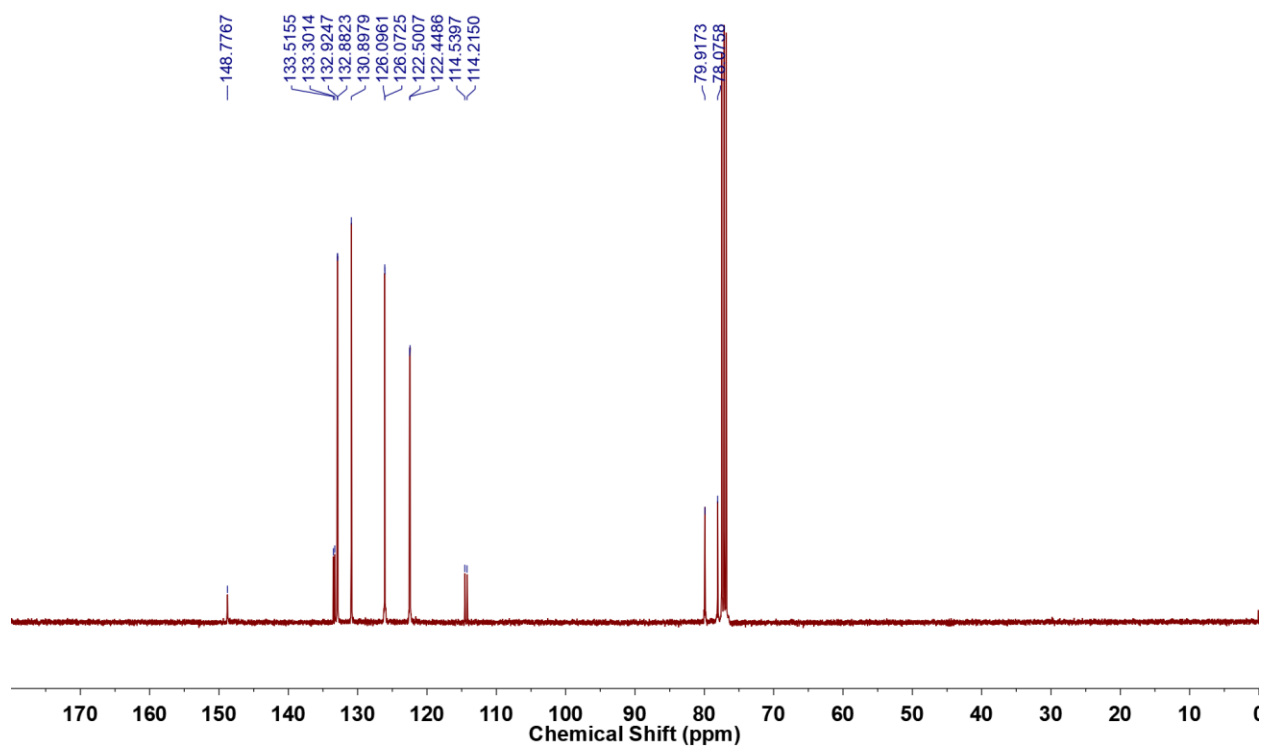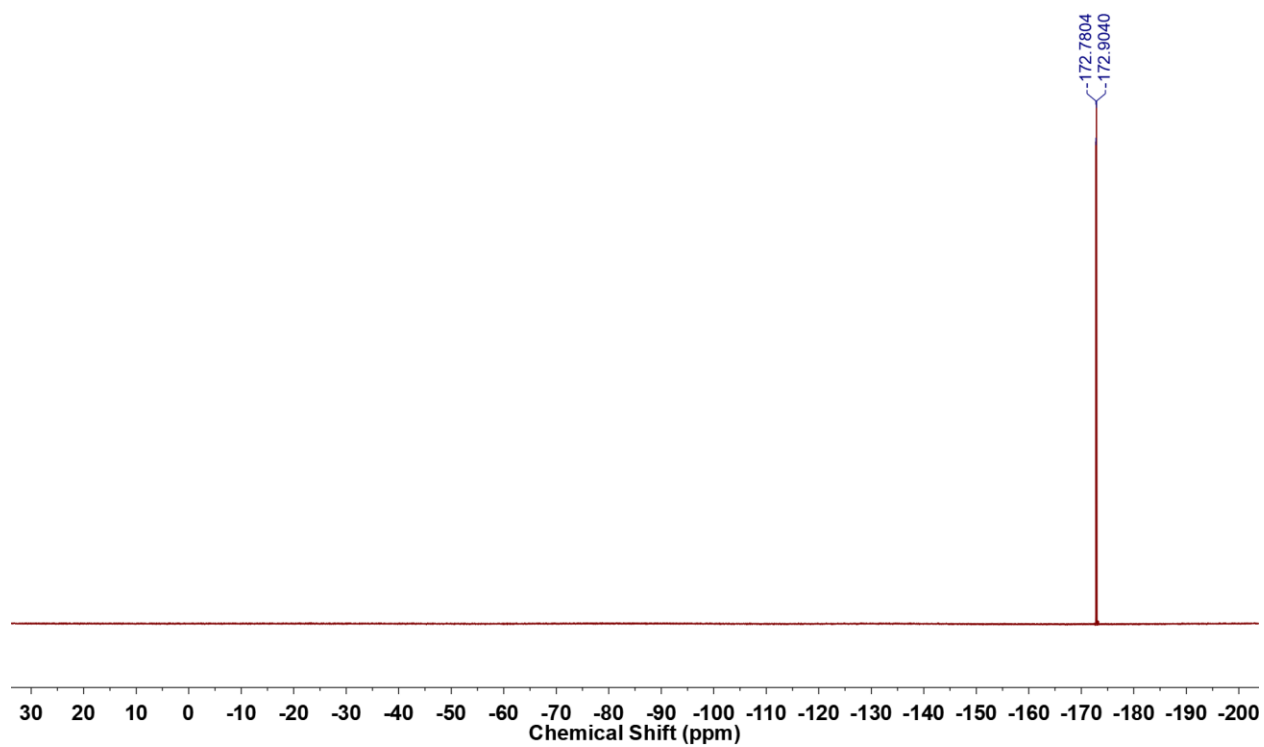

### 3-(Cyanofluoromethyl)benzonitrile (**1h**)

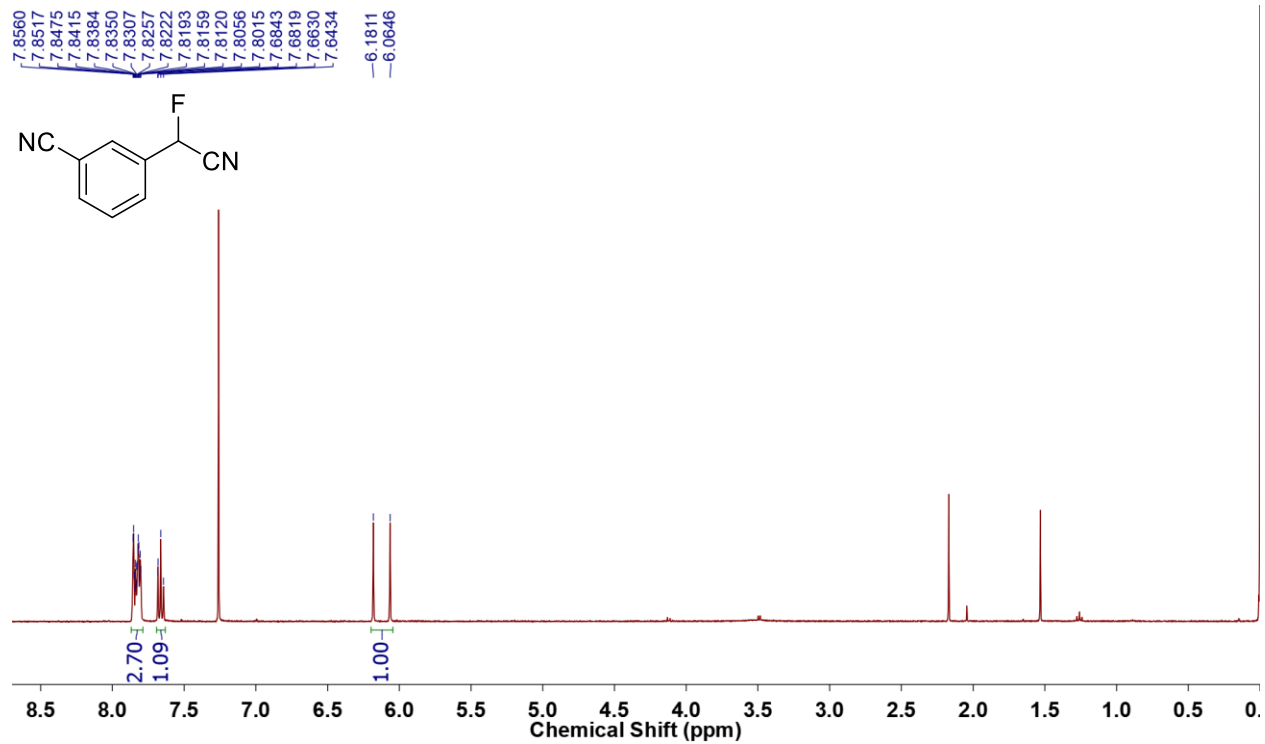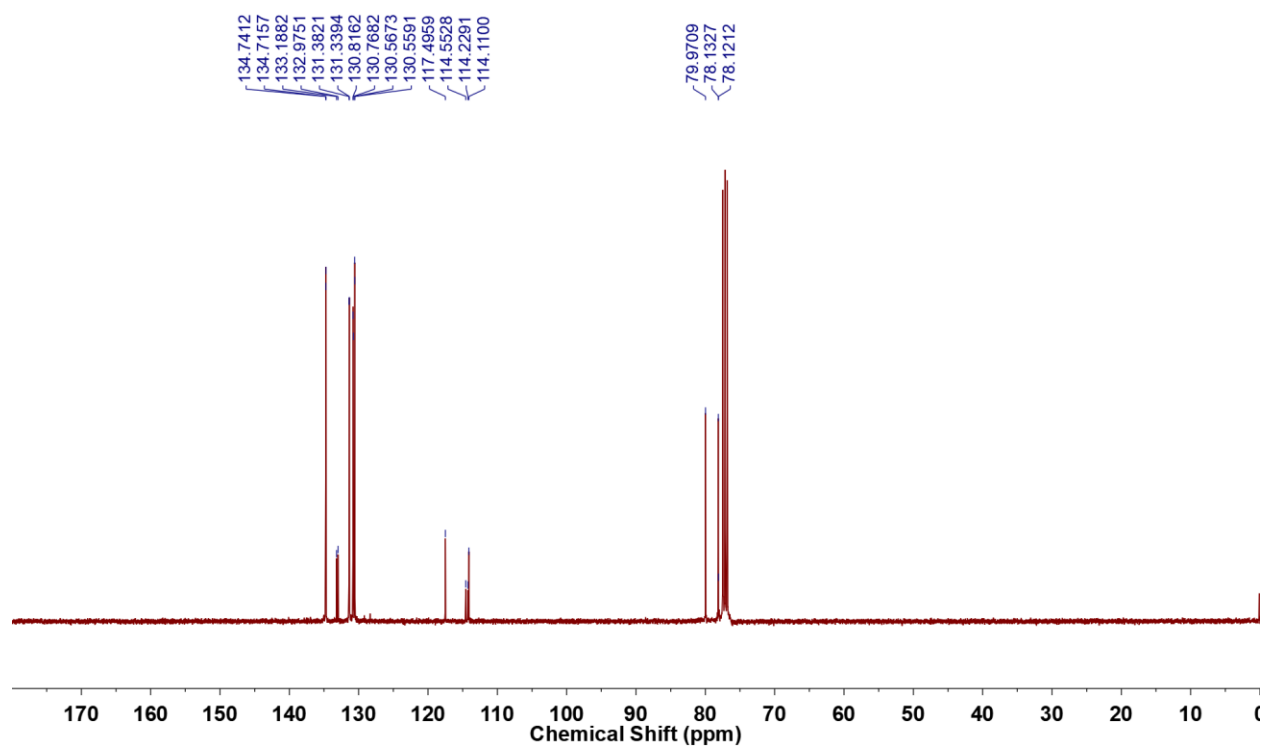

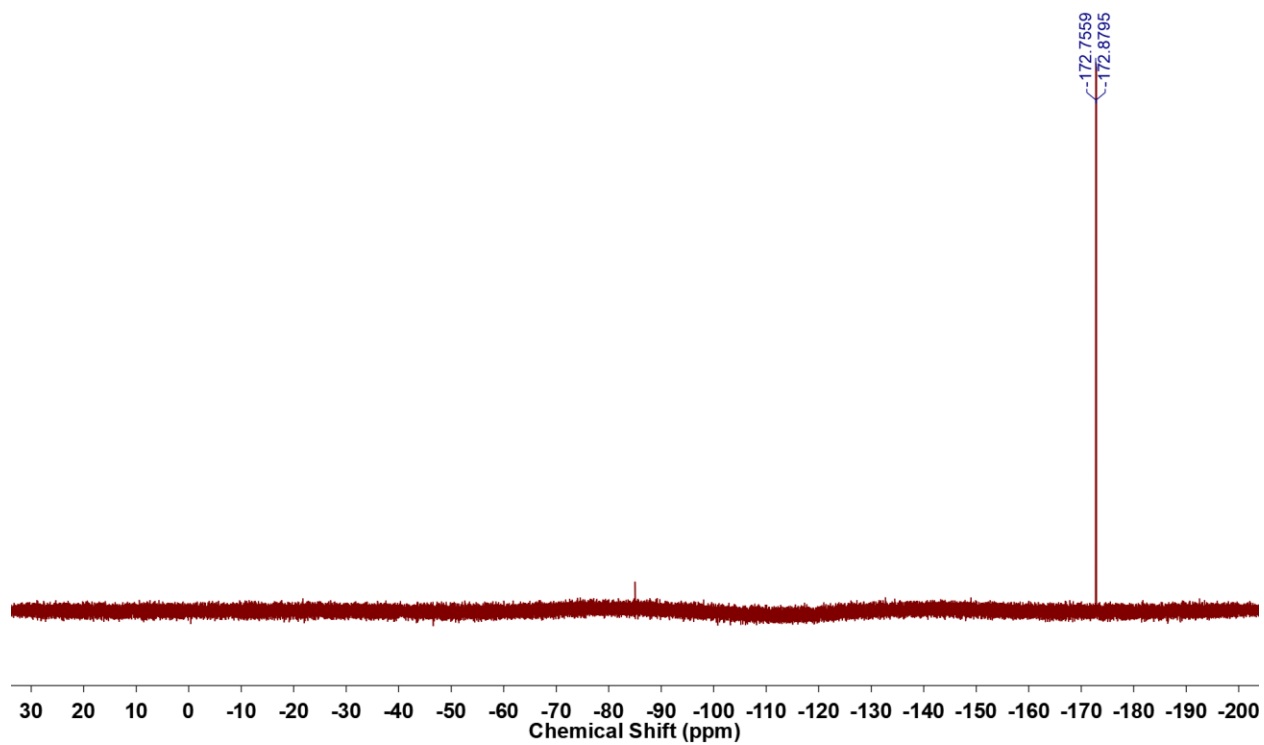

2-(3,5-Dimethoxyphenyl)-2-fluoroacetonitrile (**1i**)

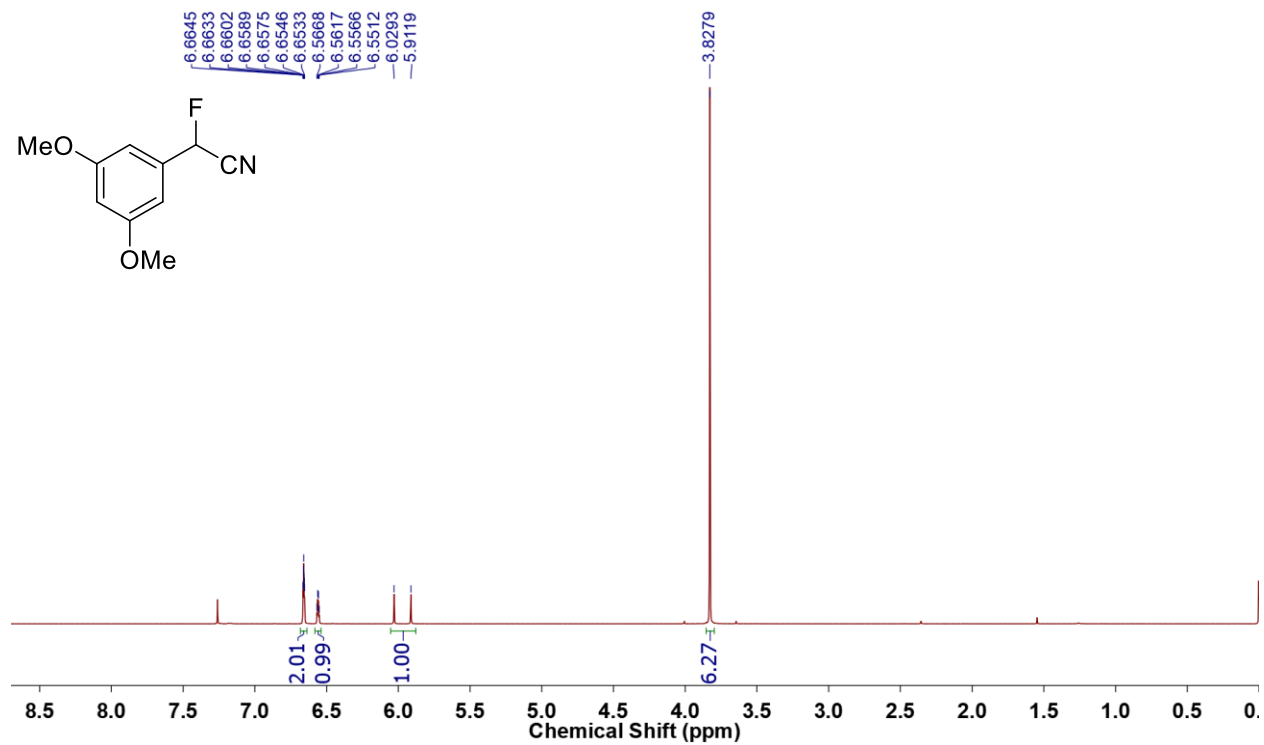



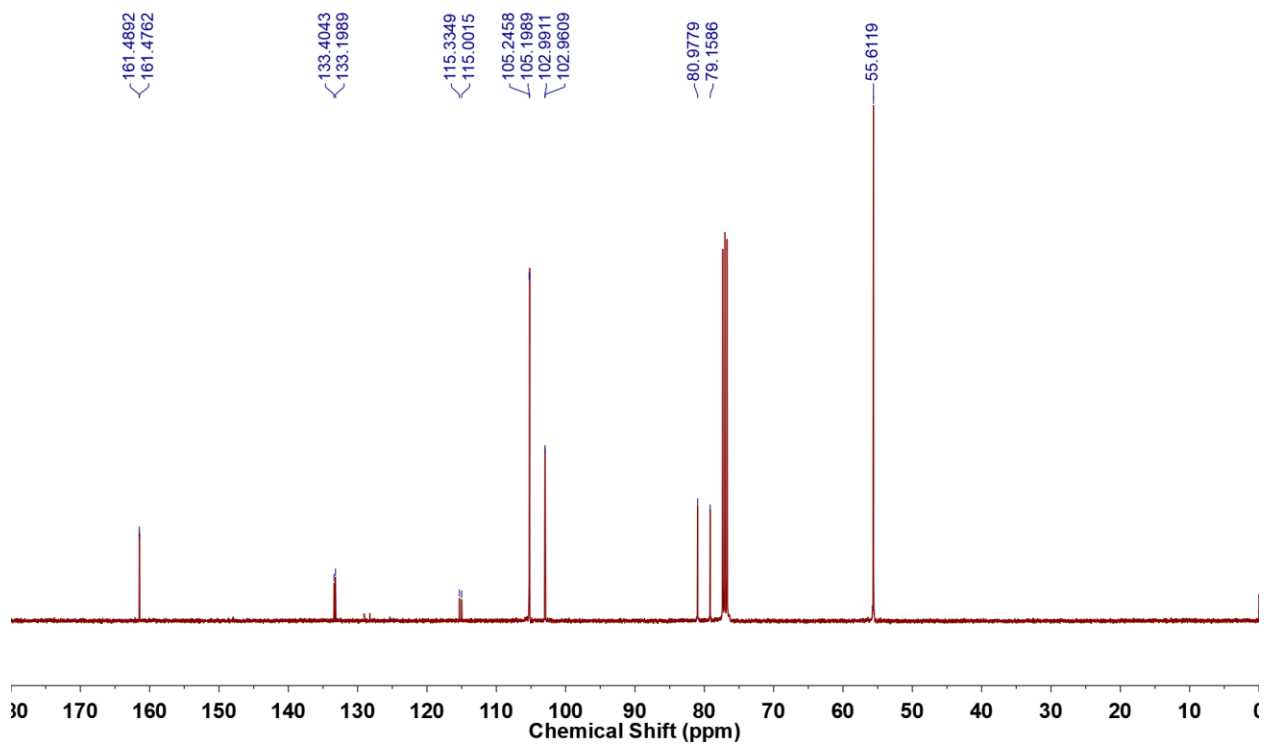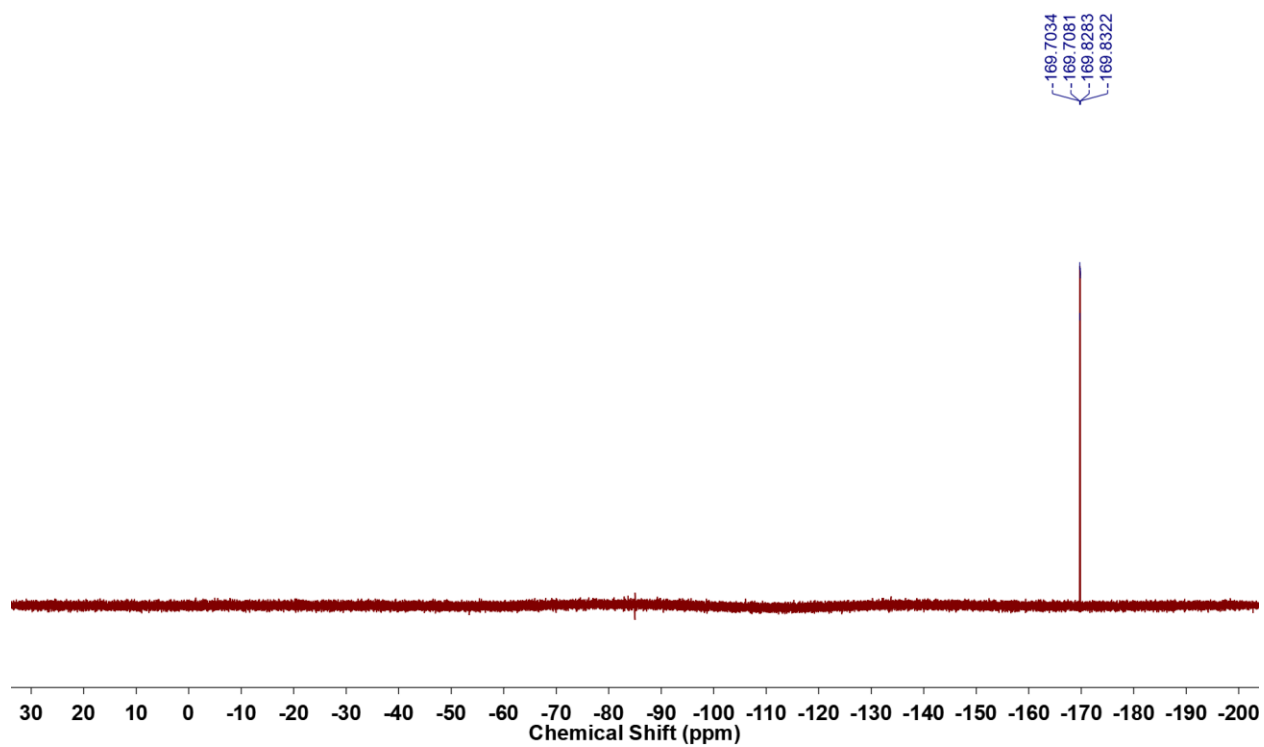

2-(Benzo[d][1,3]dioxol-5-yl)-2-fluoroacetonitrile (**1j**)

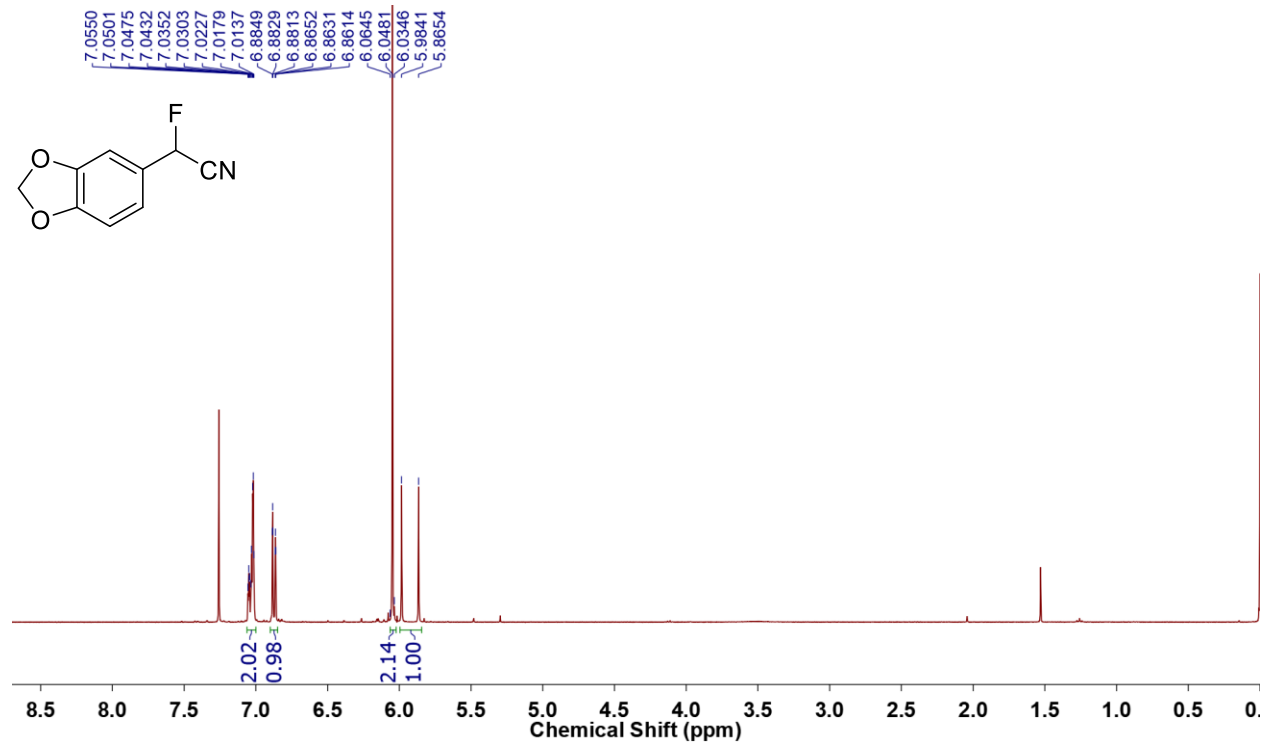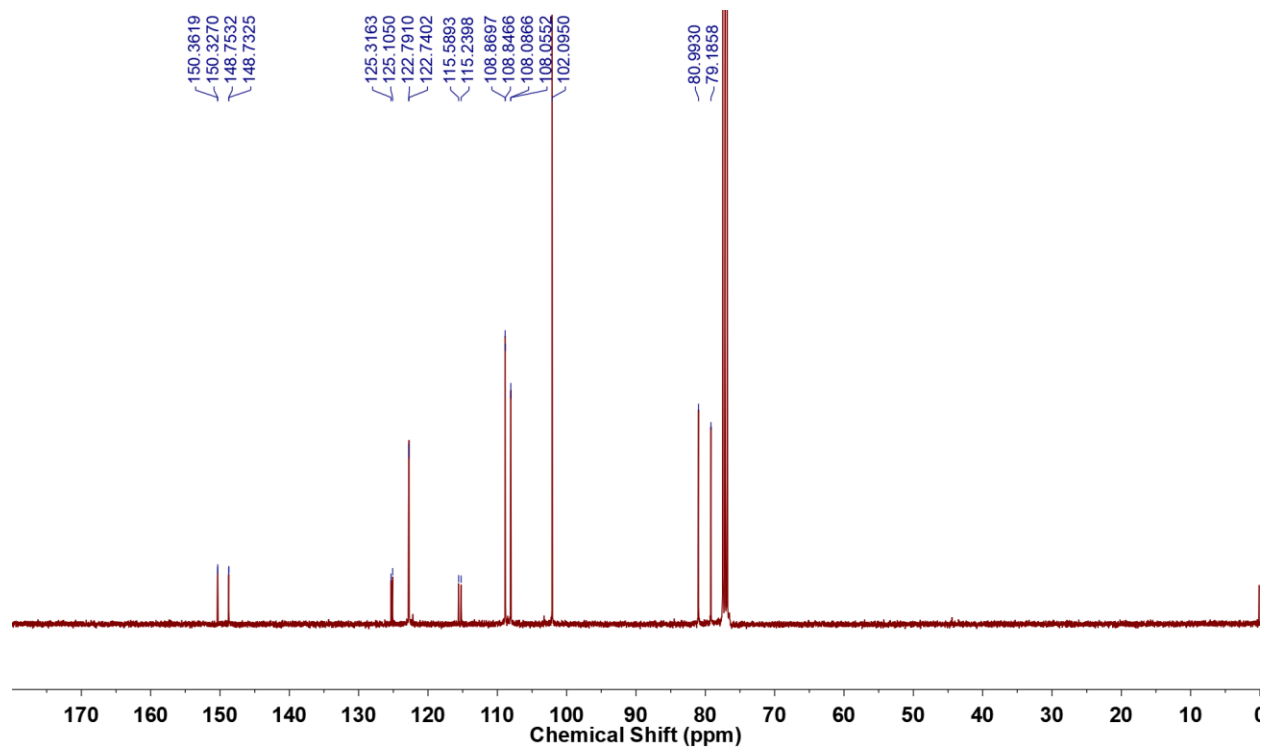

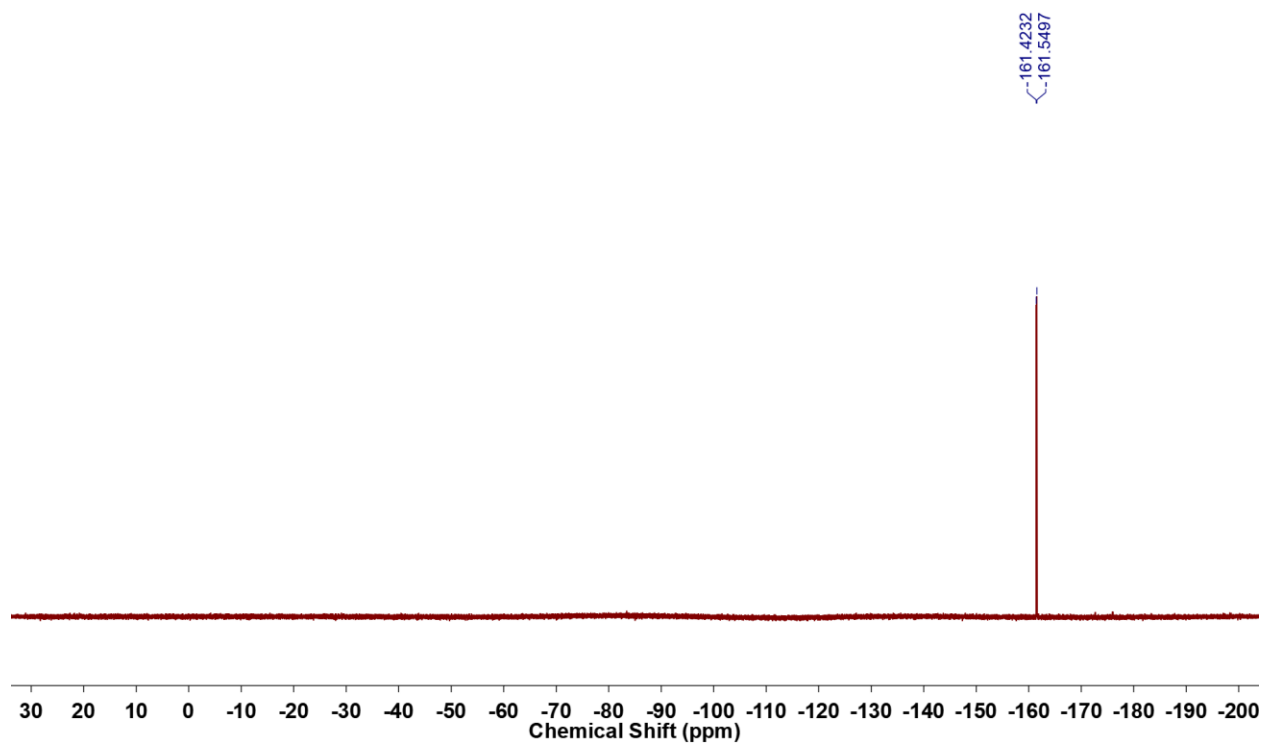

2-(9H-Fluoren-3-yl)-2-fluoroacetonitrile (**II**)

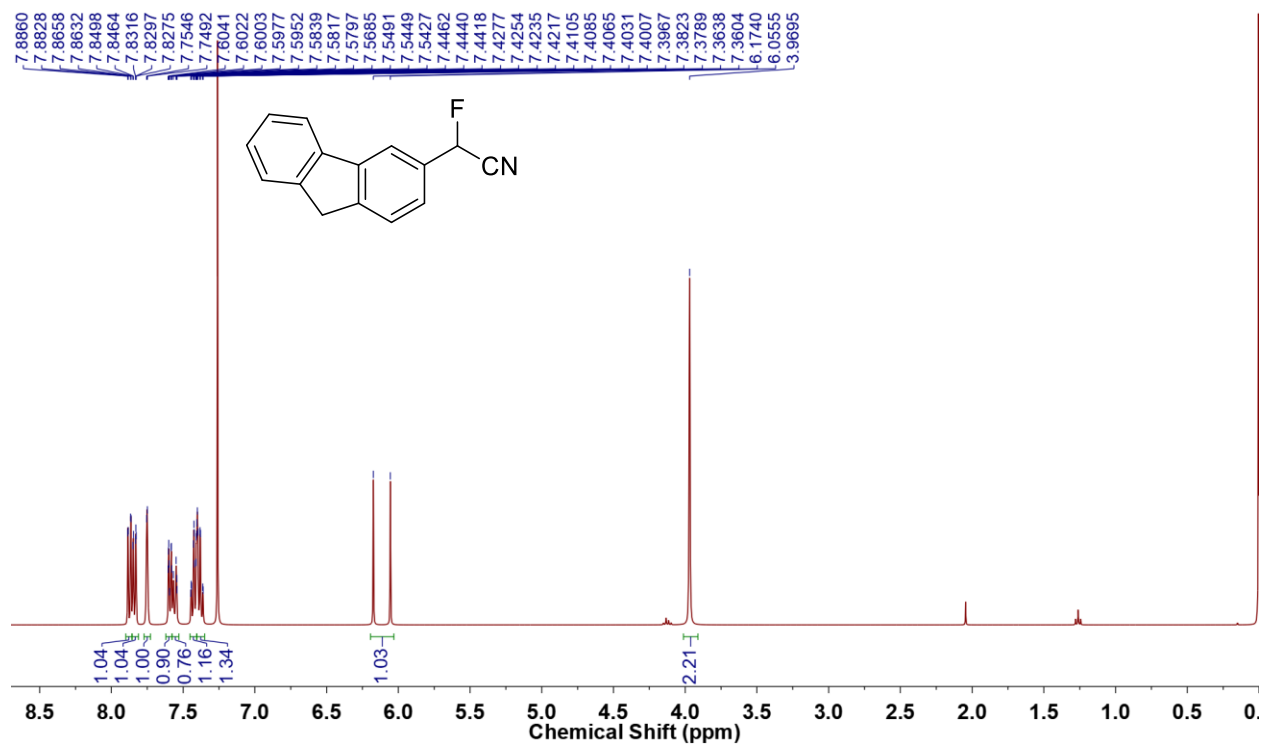

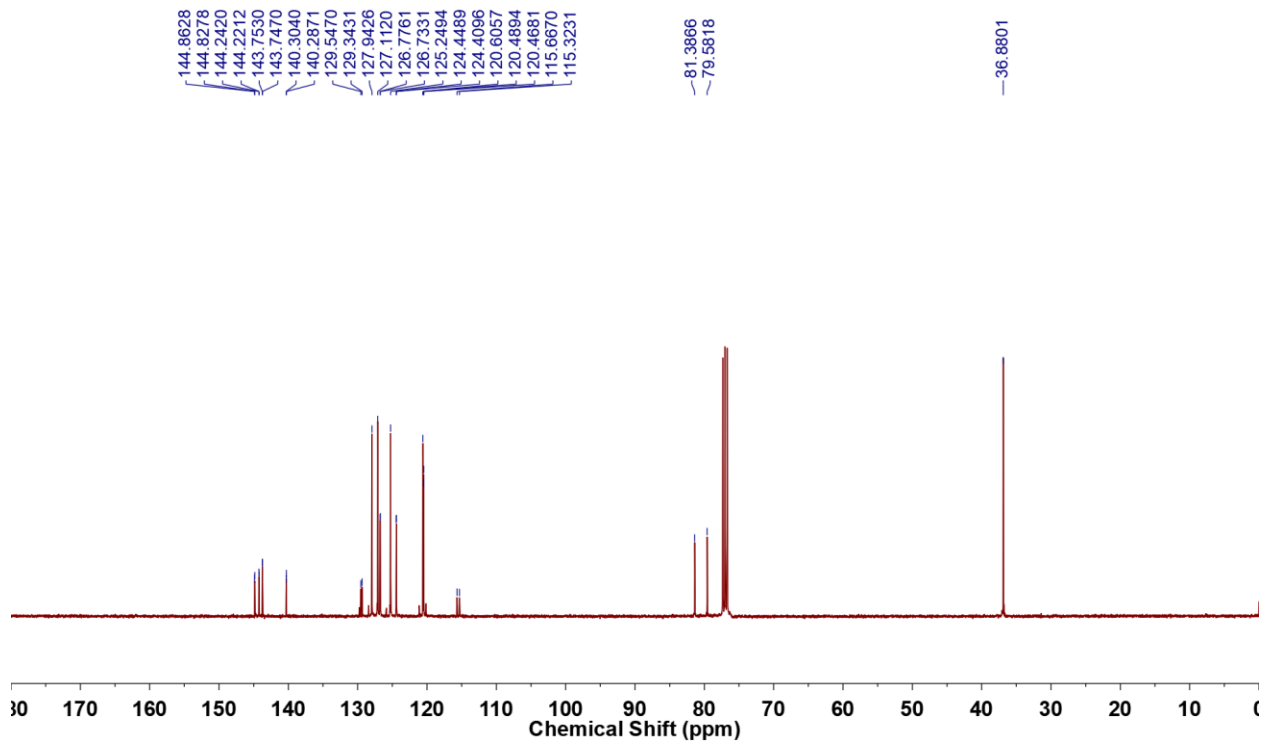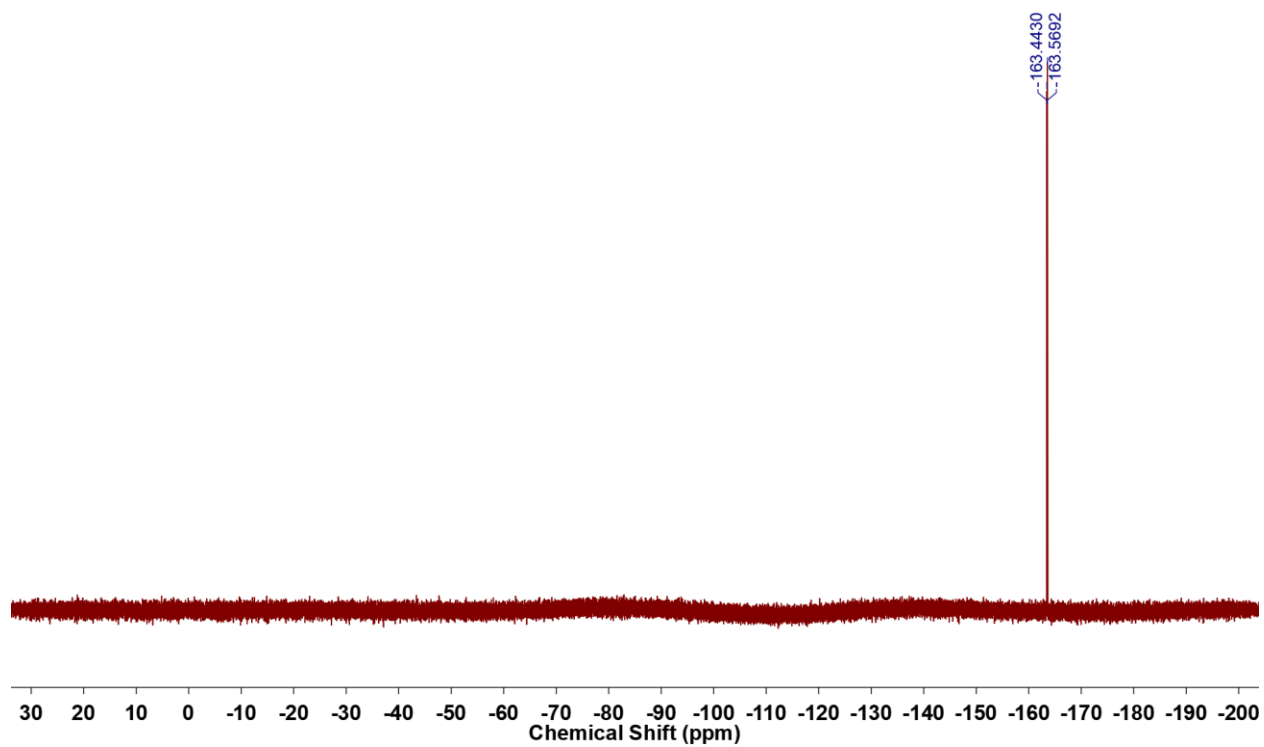

*tert*-Butyl ((*R*)-3-((*S*)-cyanofluoro(phenyl)methyl)-2-oxo-1-tritylindolin-3-yl)carbamate (**3ab**)

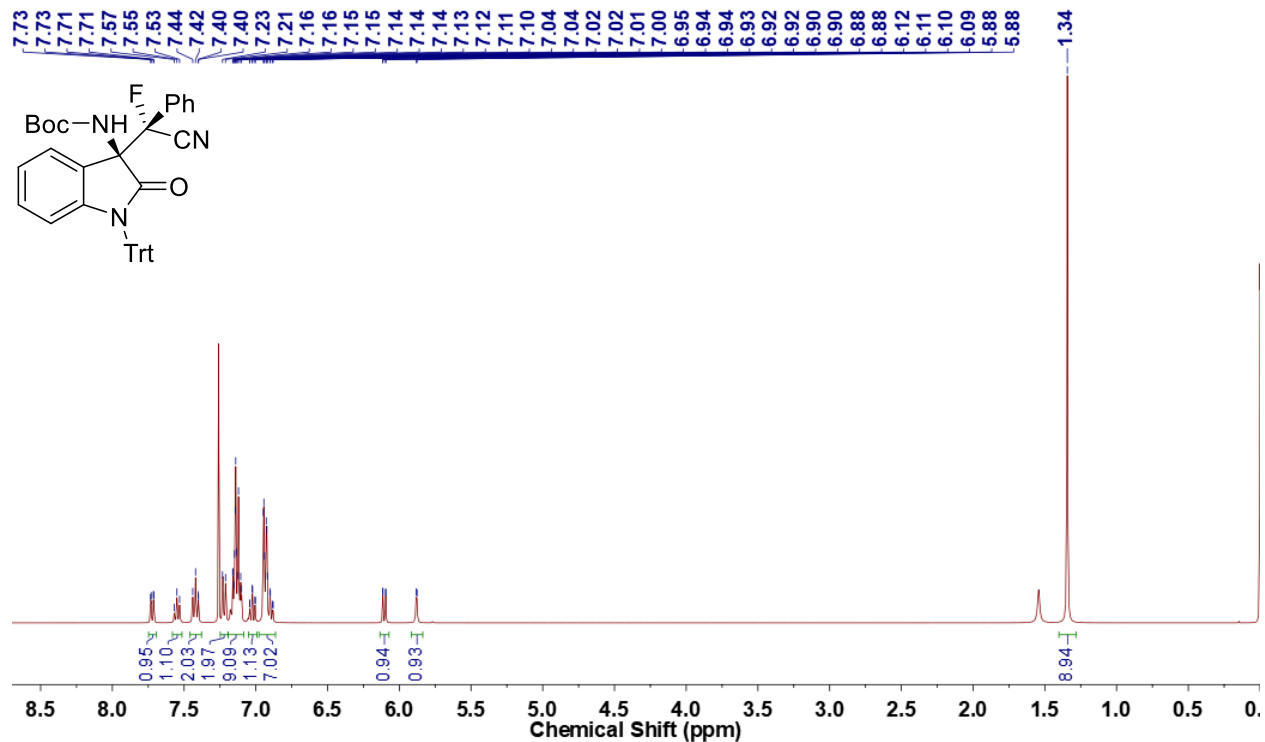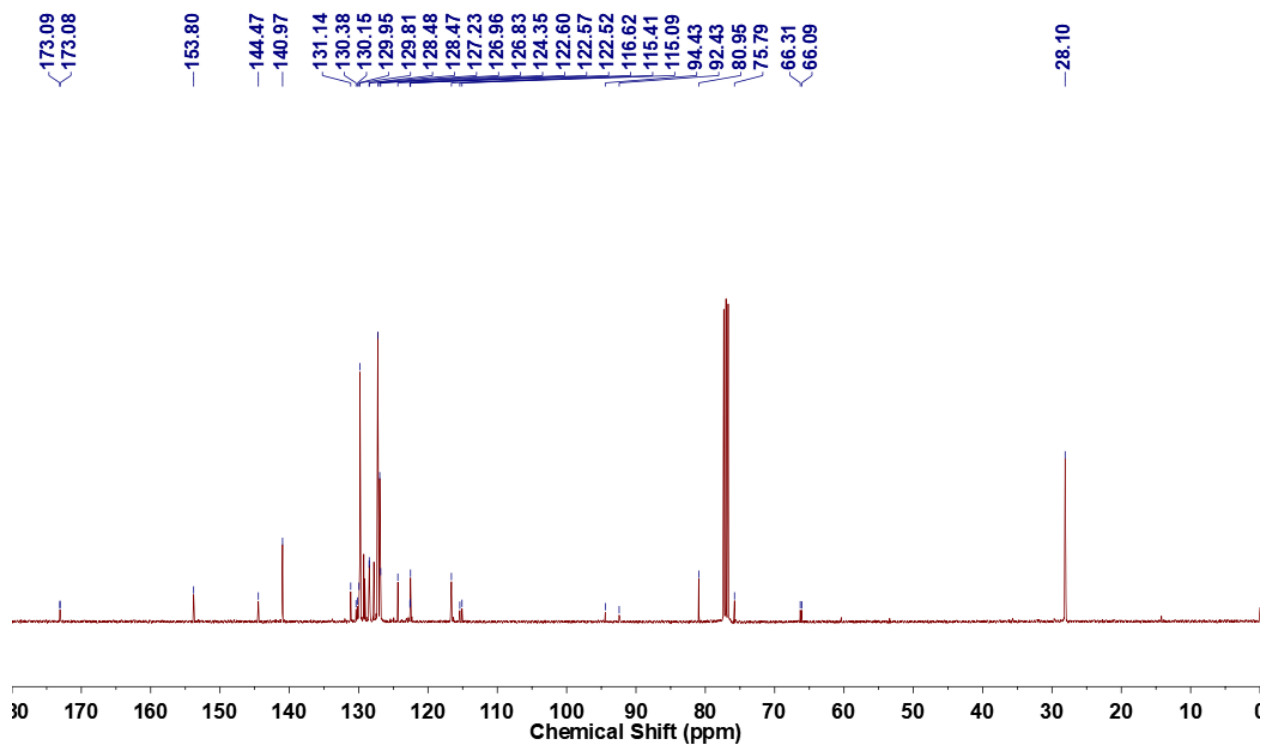

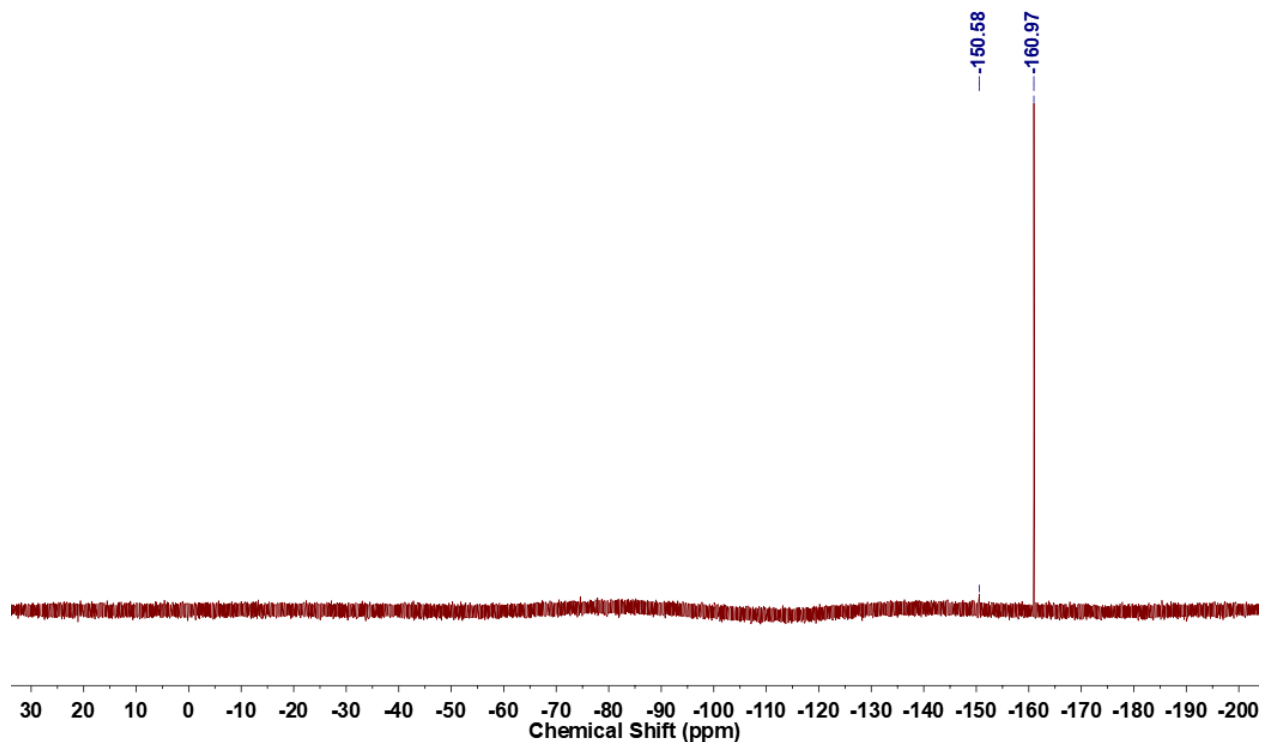

*tert*-Butyl ((*R*)-3-((*S*)-cyanofluoro(3-chlorophenyl)methyl)-2-oxo-1-tritylindolin-3-yl)carbamate (**3bb**)

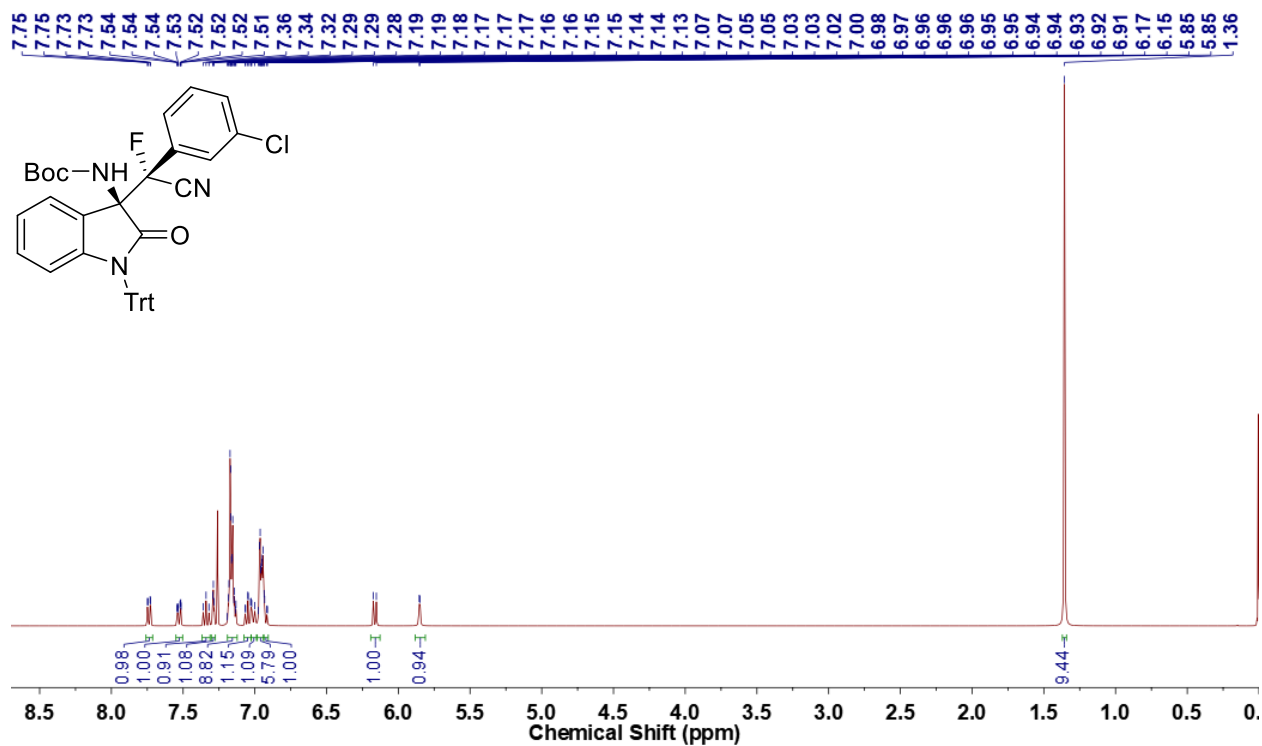

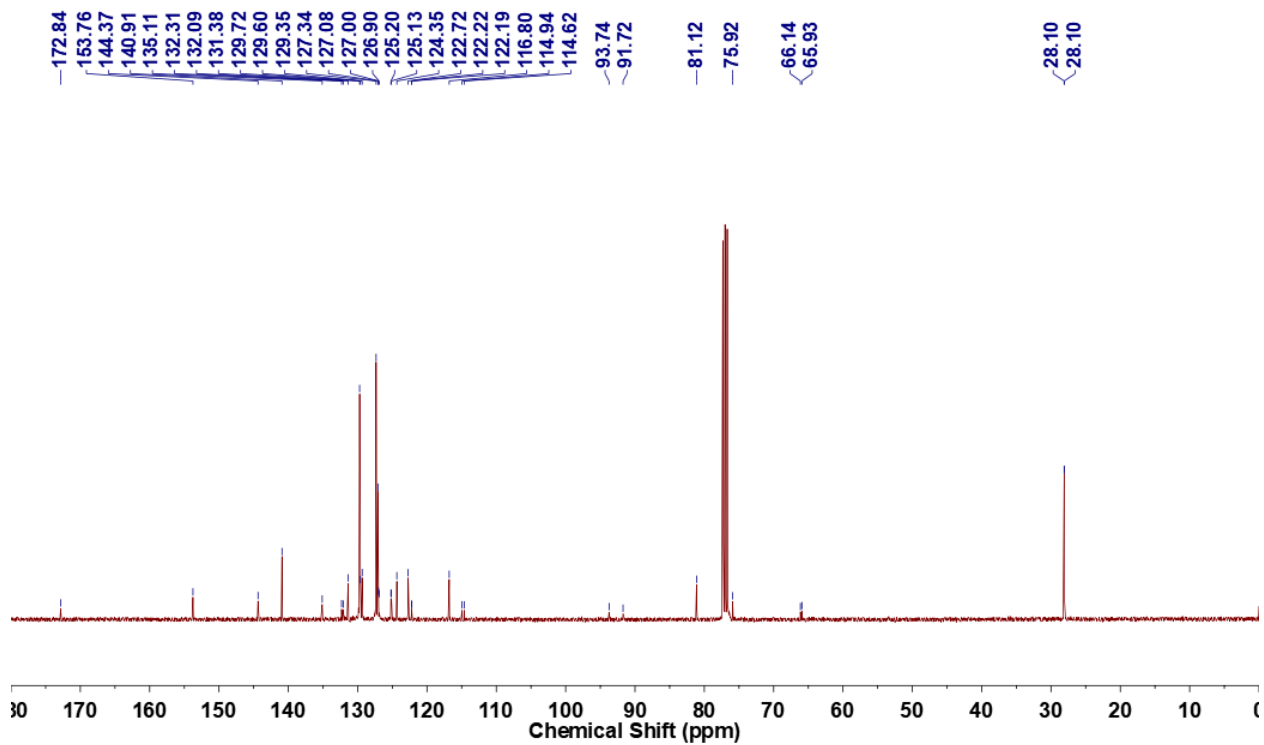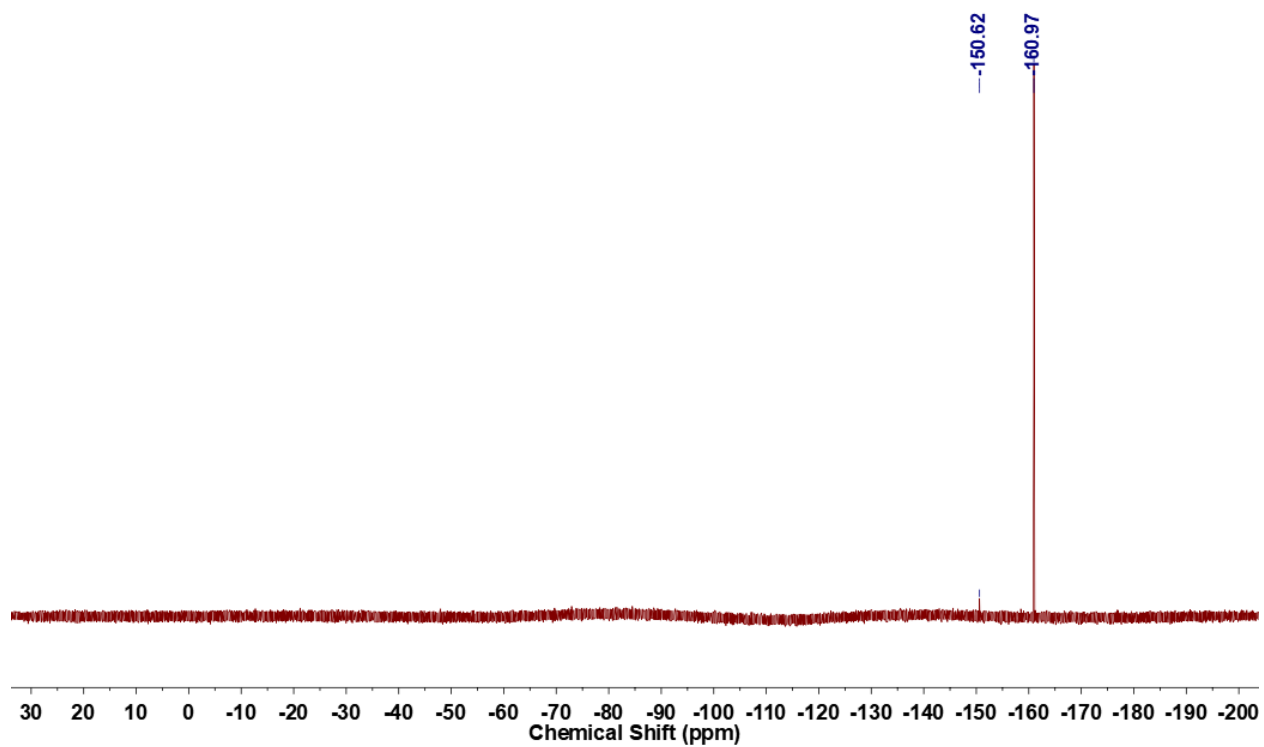

*tert*-Butyl ((*R*)-3-((*S*)-cyano fluoro(3-bromophenyl)methyl)-2-oxo-1-tritylindolin-3-yl)carbamate  
(3b)

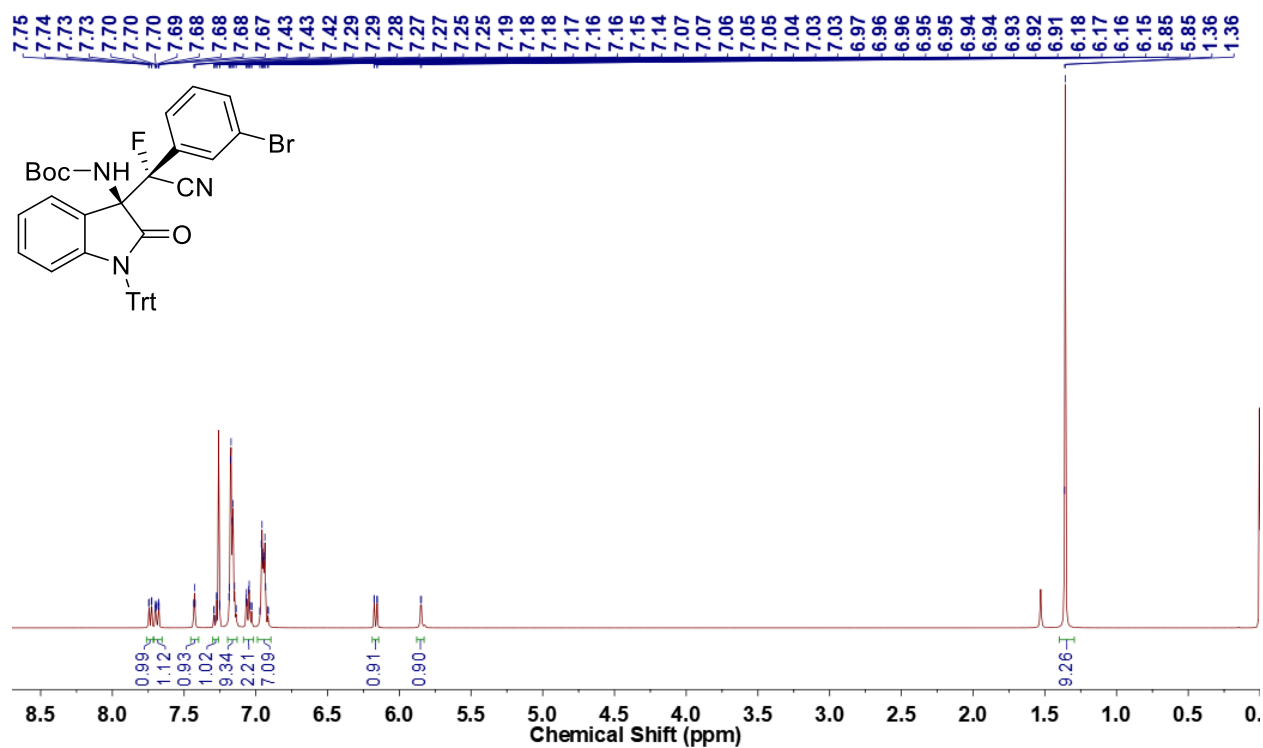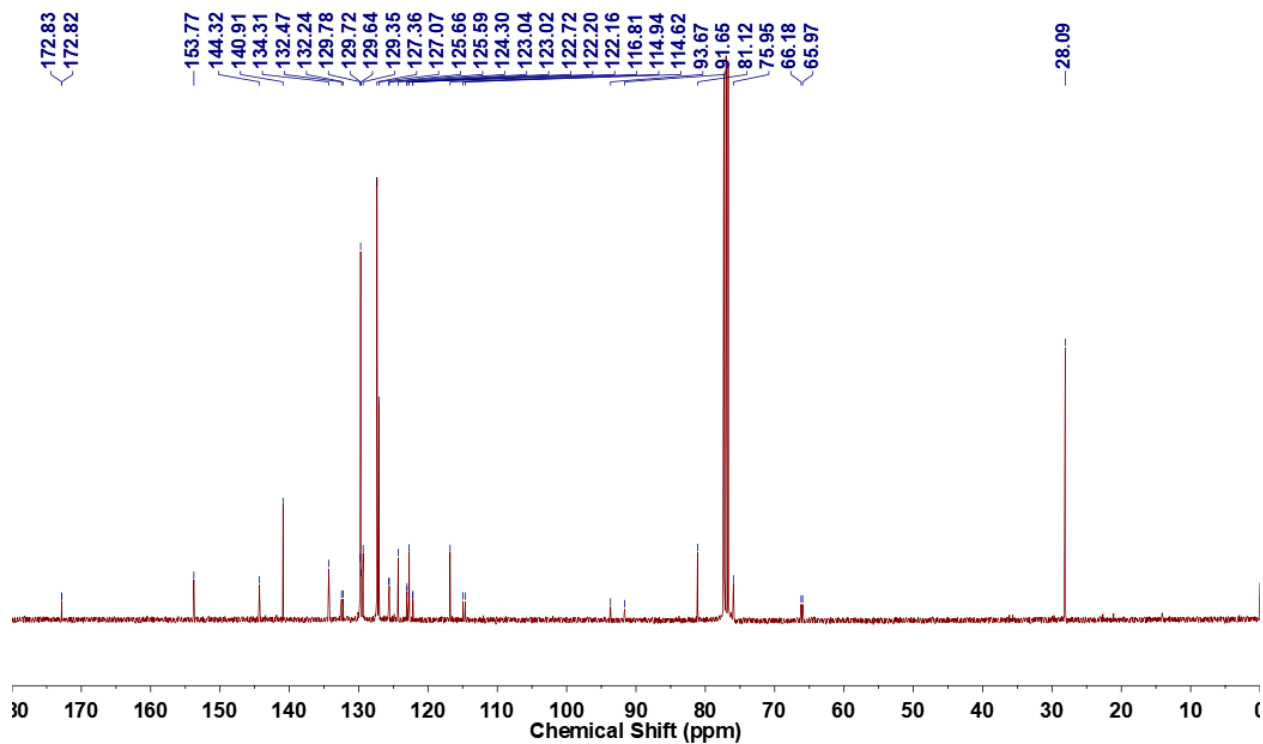



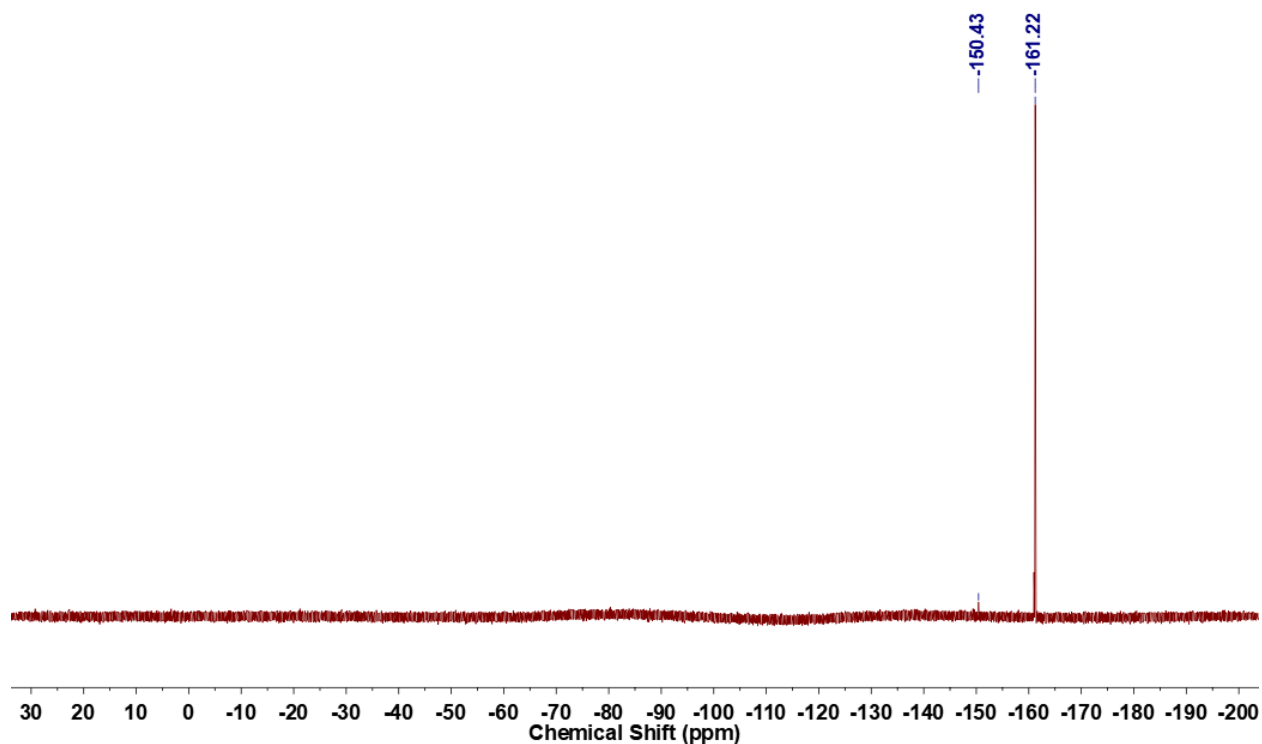

*tert*-Butyl ((*R*)-3-((*S*)-cyanofluoro(2-fluorophenyl)methyl)-2-oxo-1-tritylindolin-3-yl)carbamate  
(**3db**)

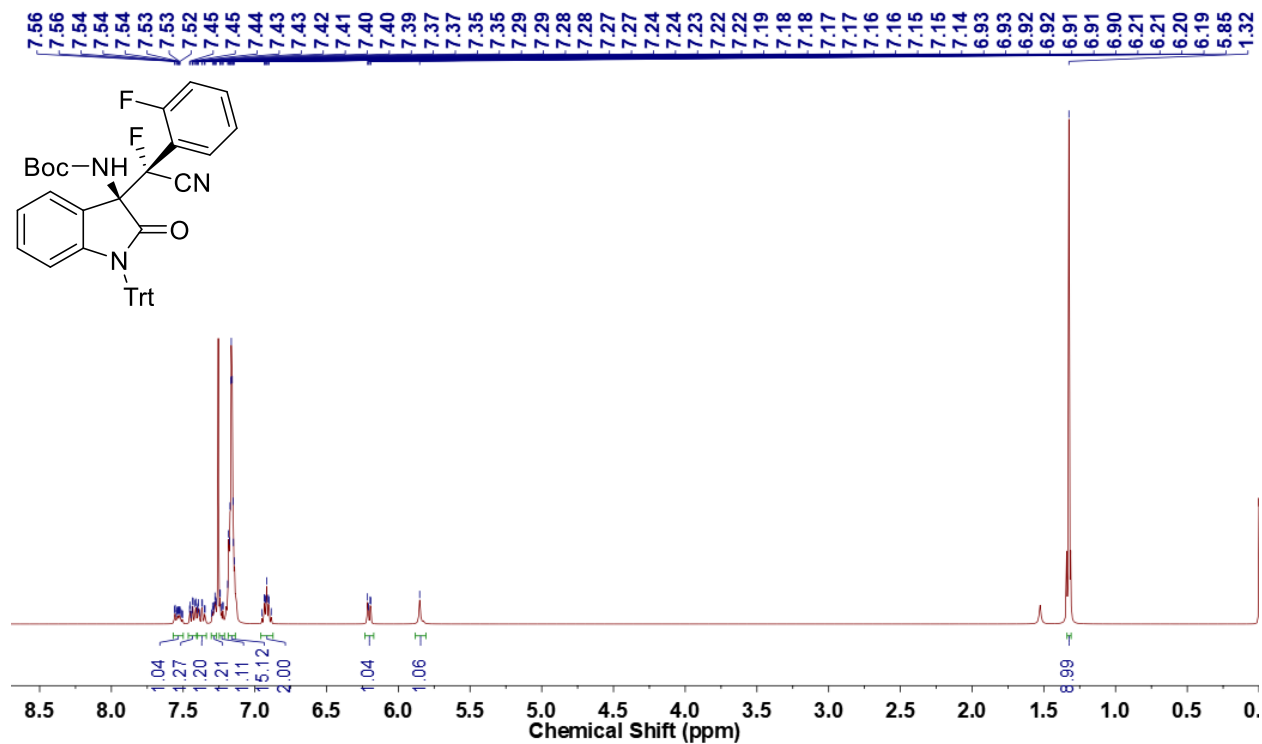

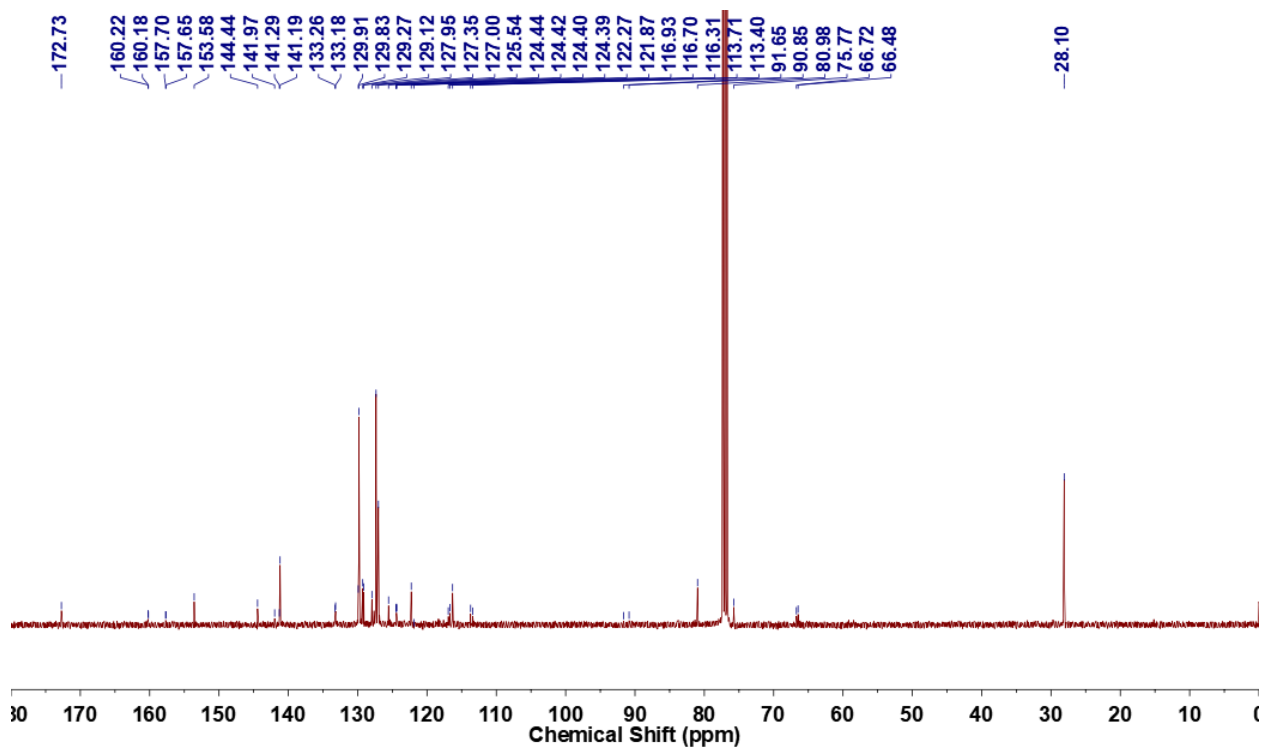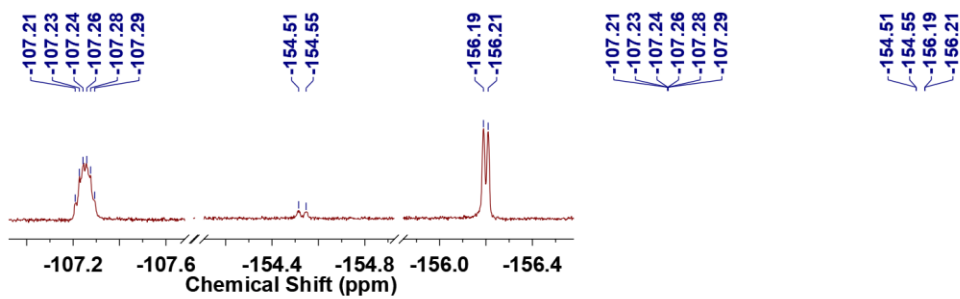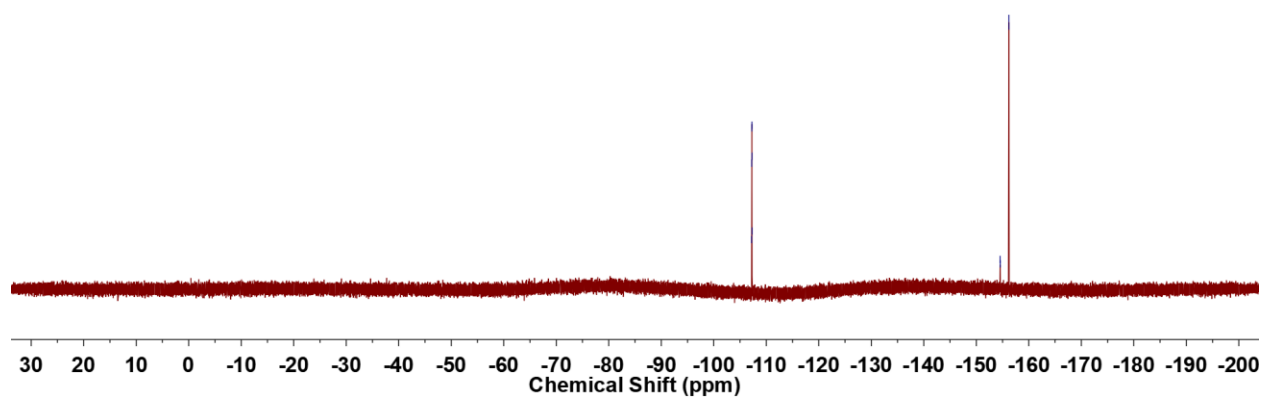

*tert*-Butyl ((*R*)-3-((*S*)-cyano fluoro(3-methoxyphenyl)methyl)-2-oxo-1-tritylindolin-3-yl)carbamate (**3b**)

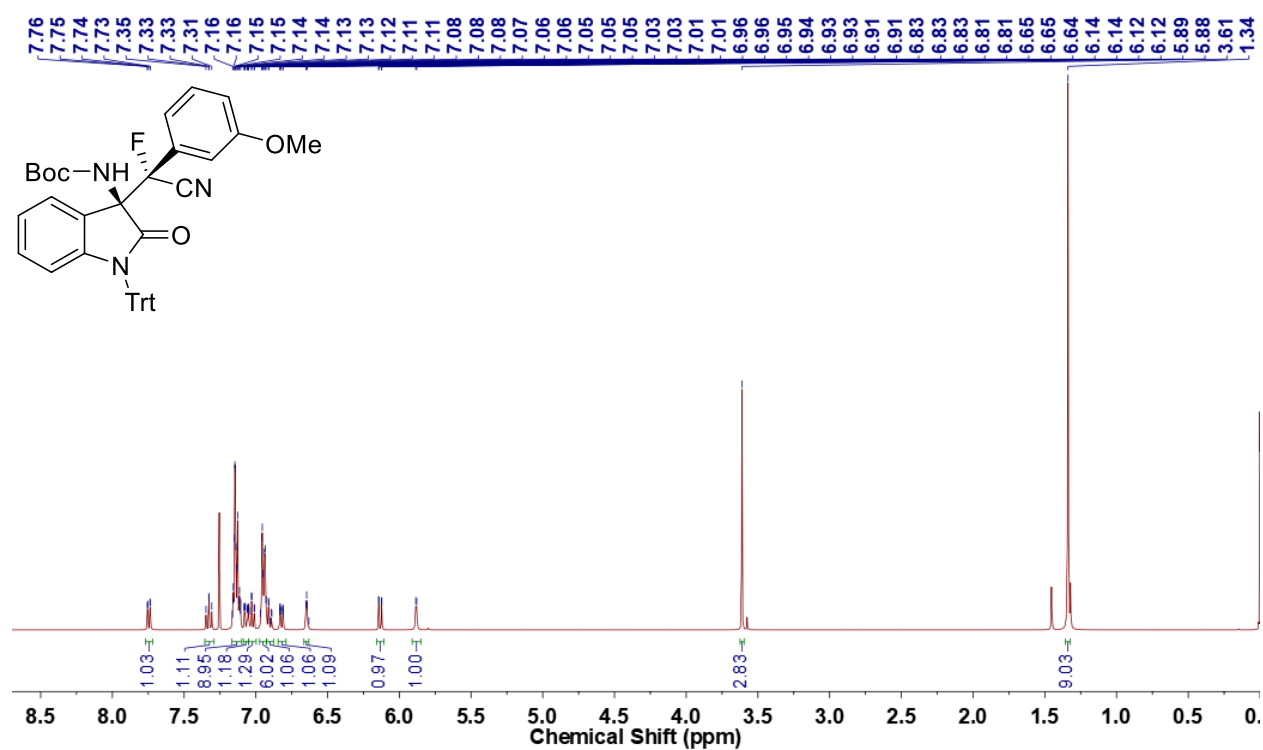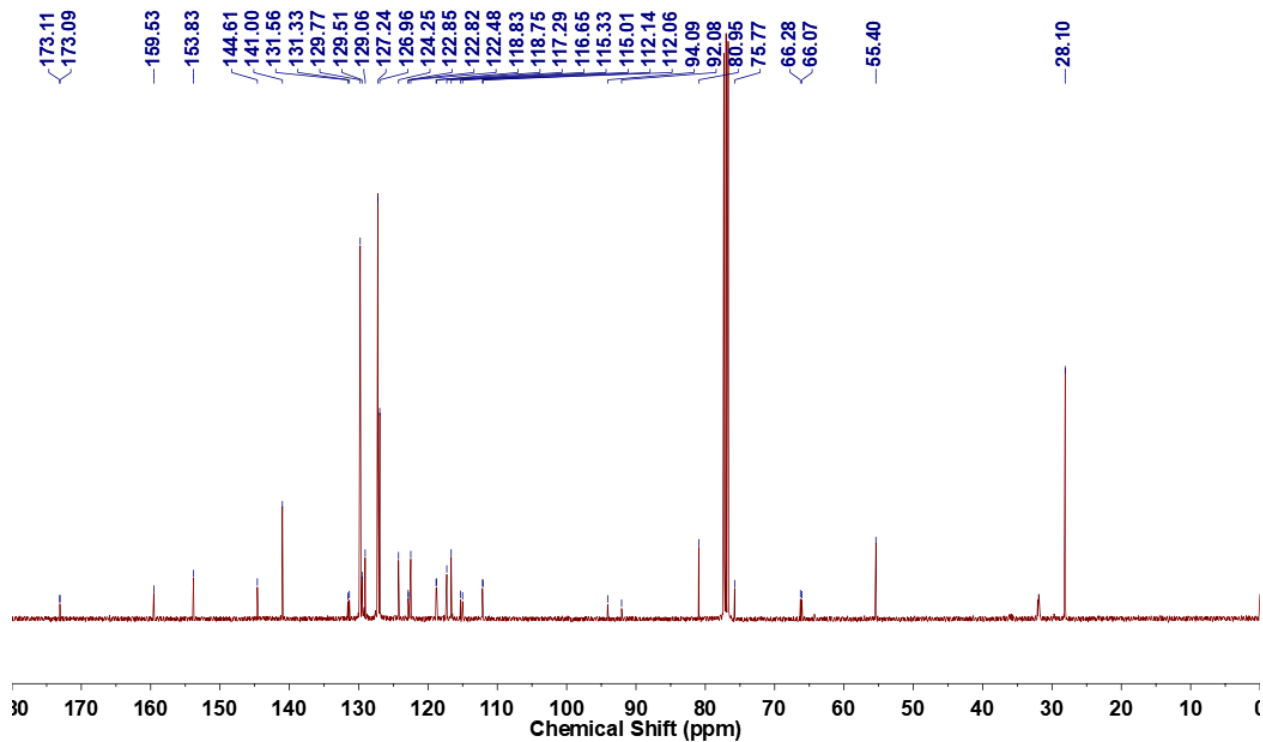

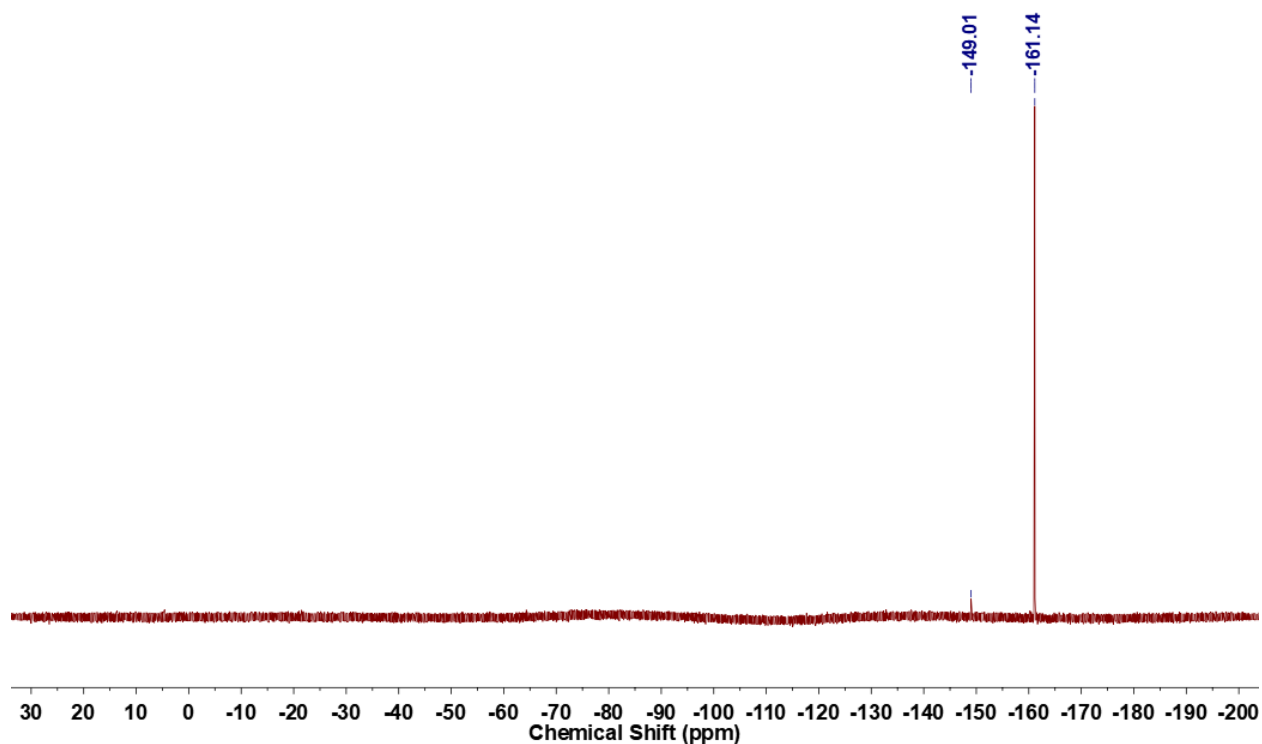

Methyl 4-((*S*)-((*R*)-3-((*tert*-butoxycarbonyl)amino)-2-oxo-1-tritylindolin-3-yl)  
(cyano)fluoromethyl)benzoate (**3fb**)

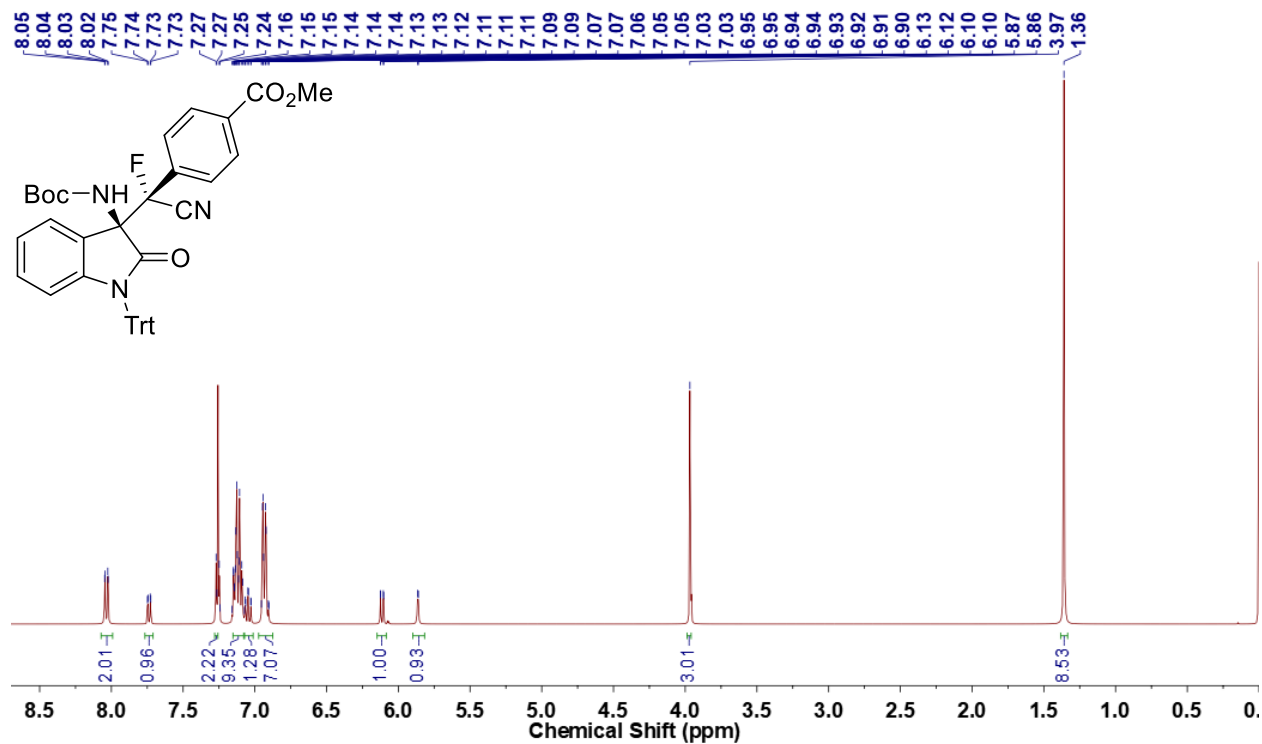

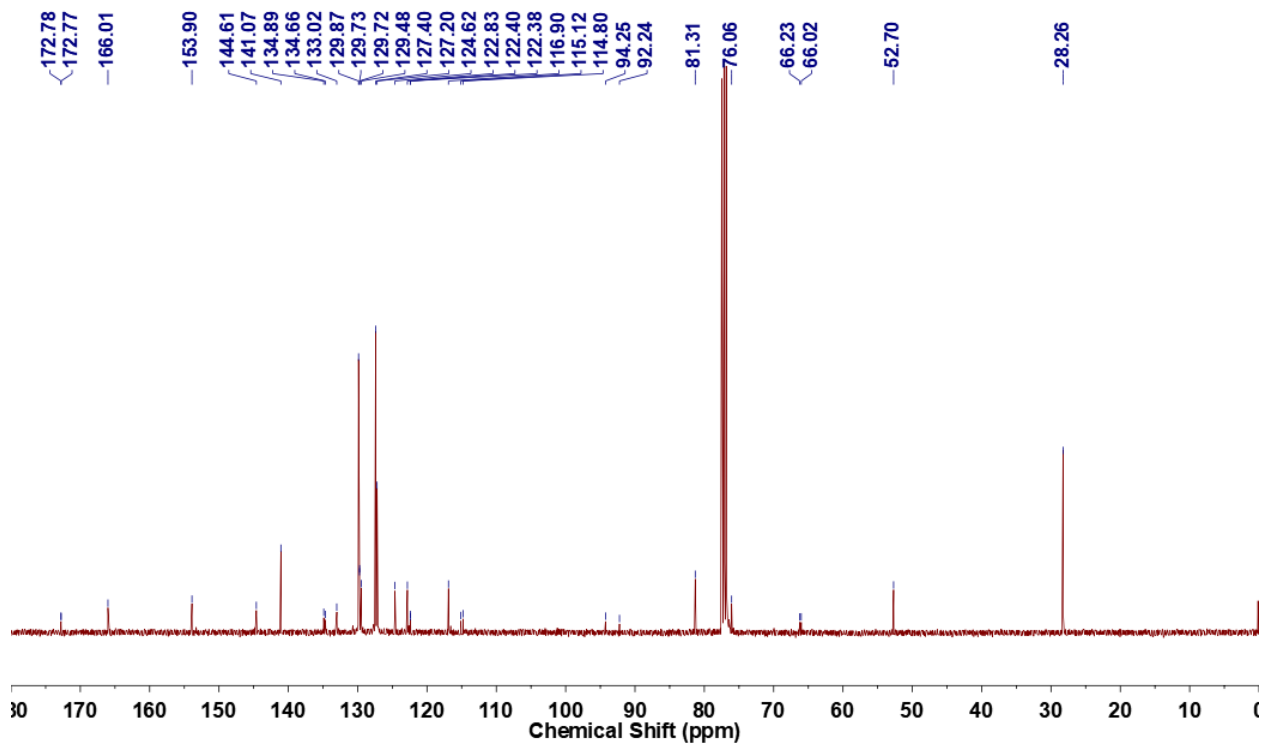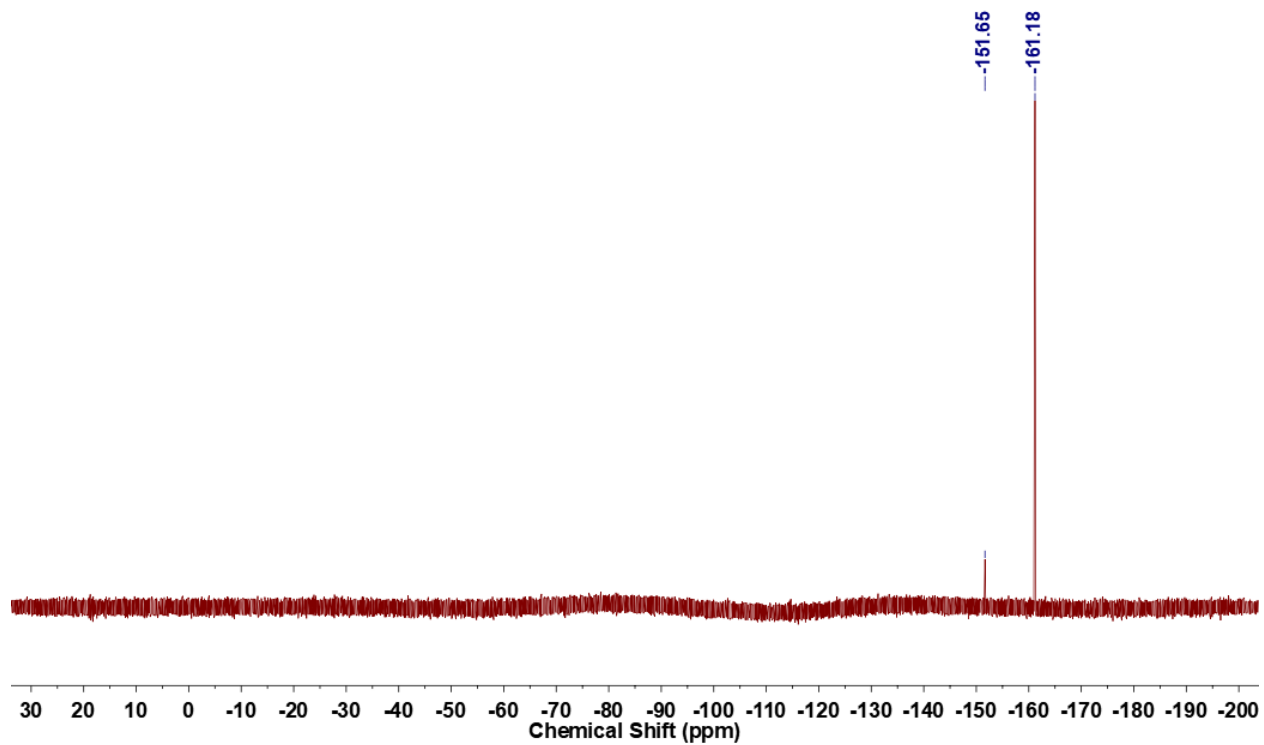

*tert*-Butyl ((*R*)-3-((*S*)-cyano fluoro(3-nitrophenyl)methyl)-2-oxo-1-tritylindolin-3-yl)carbamate  
(3gb)

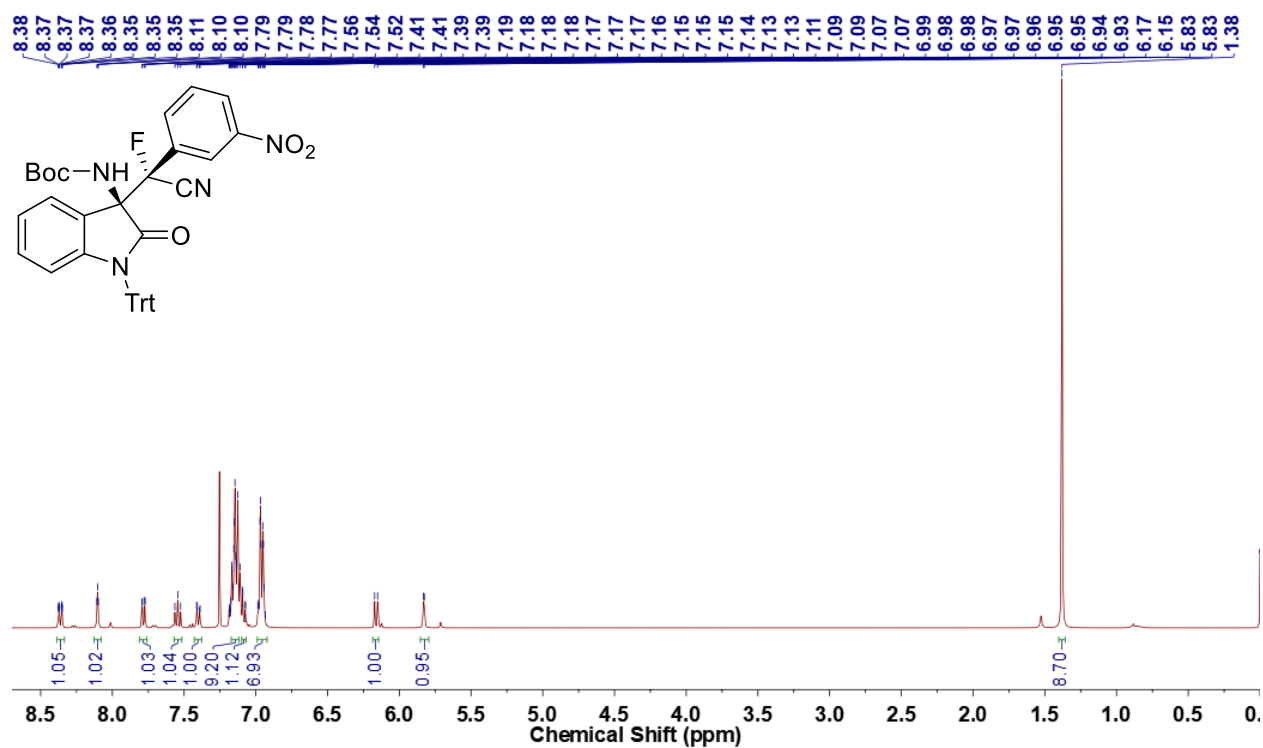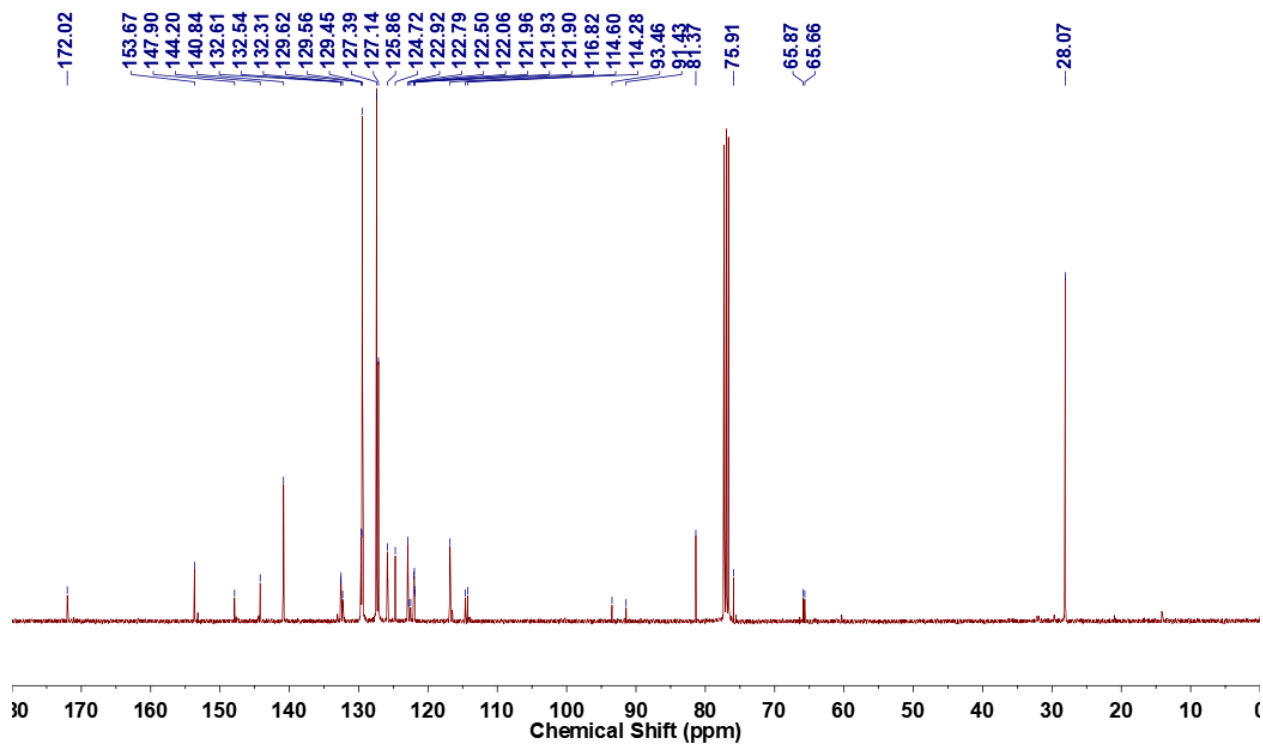

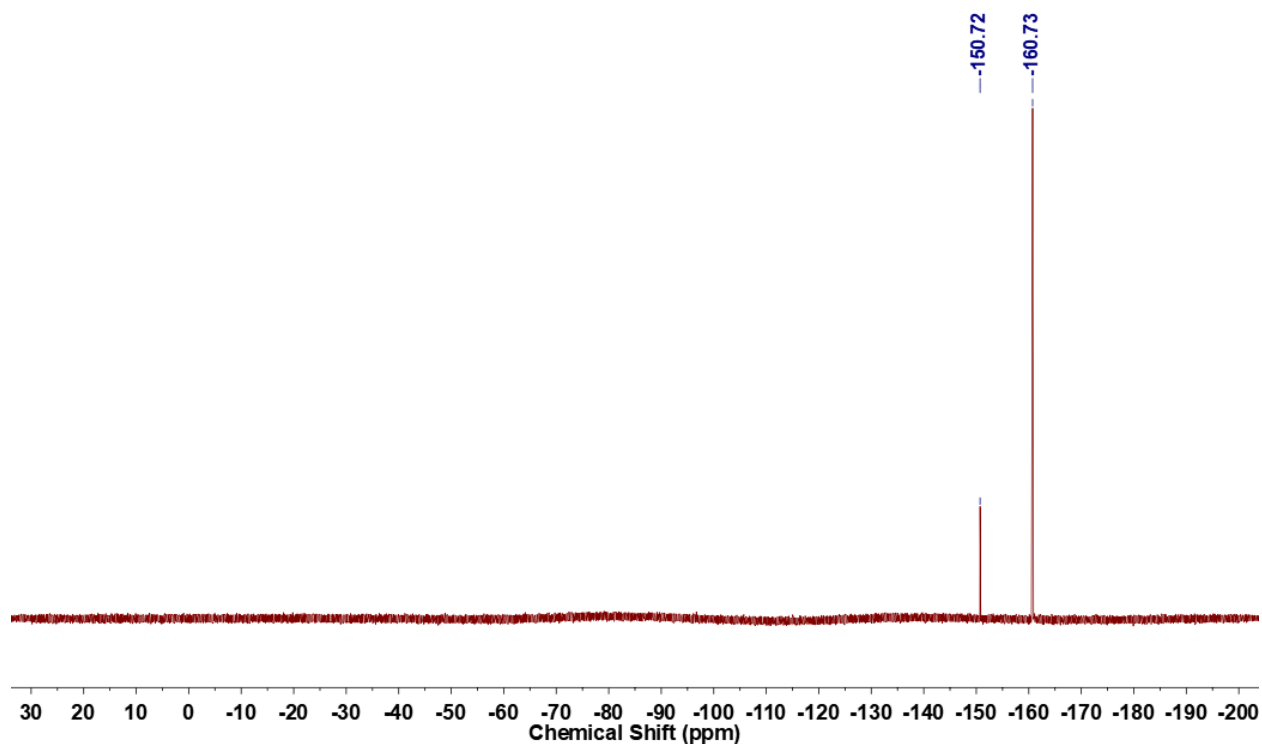

*tert*-Butyl ((*R*)-3-((*S*)-cyanofluoro(3-cyanophenyl)methyl)-2-oxo-1-tritylindolin-3-yl)carbamate  
(**3hb**)

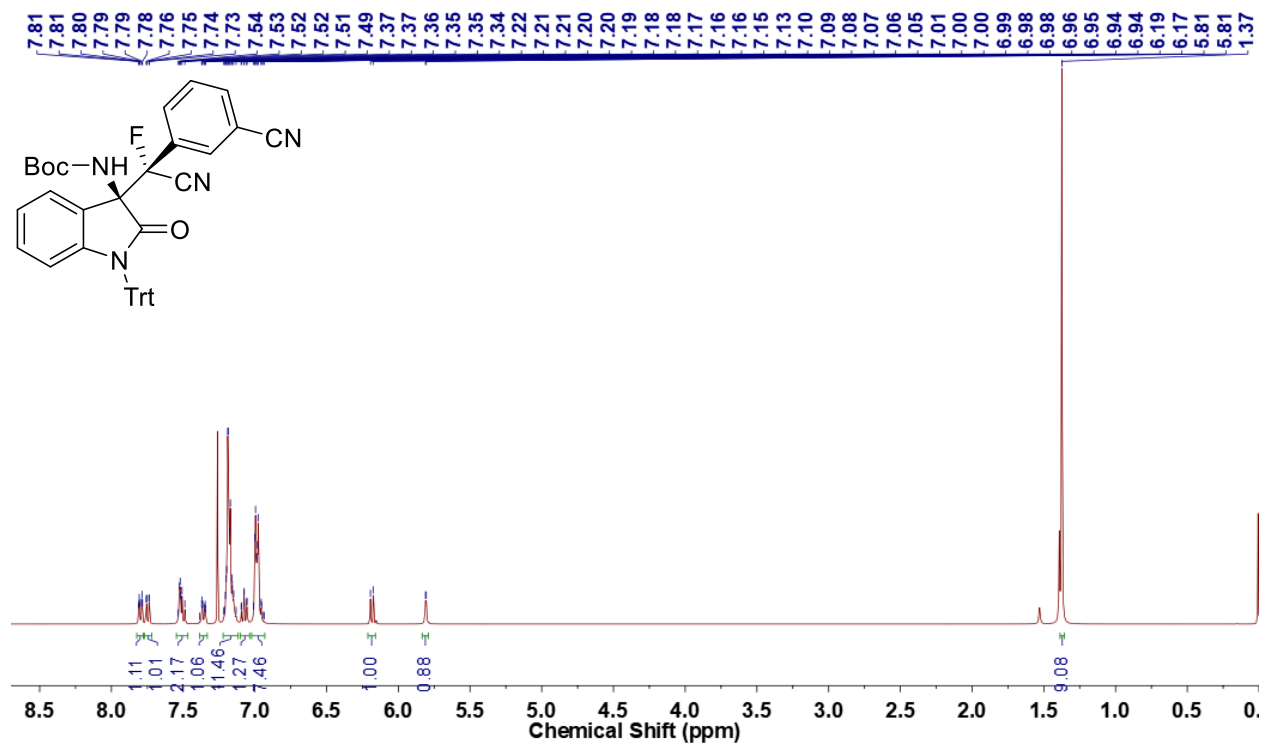

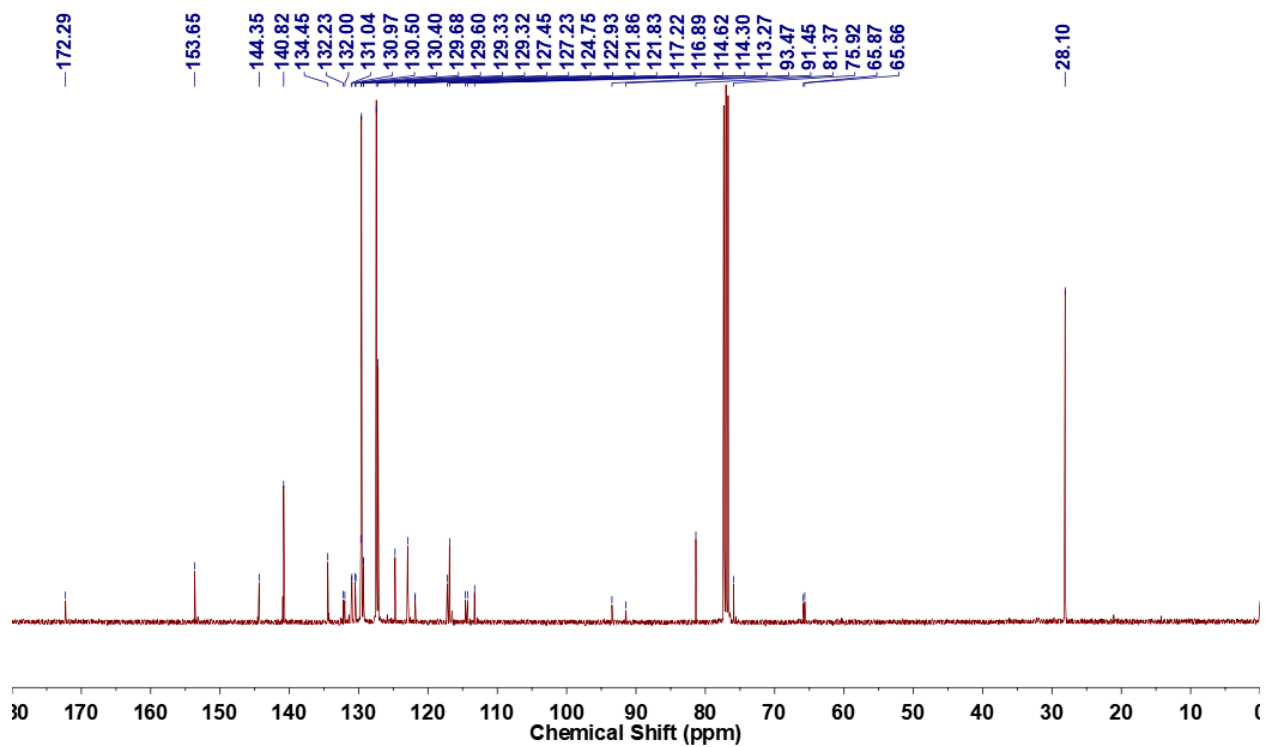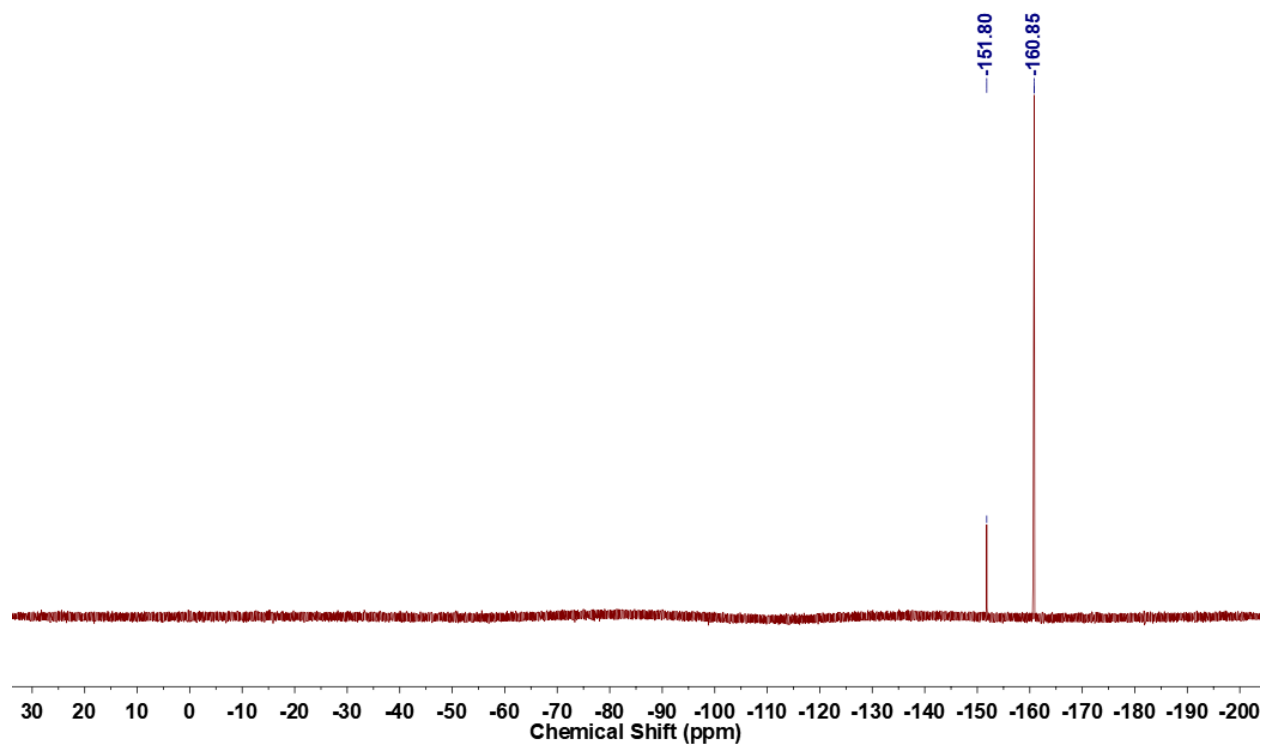



*tert*-Butyl ((*R*)-3-((*S*)-cyano(3,5-dimethoxyphenyl)fluoromethyl)-2-oxo-1-tritylindolin-3-yl)carbamate (**3b**)

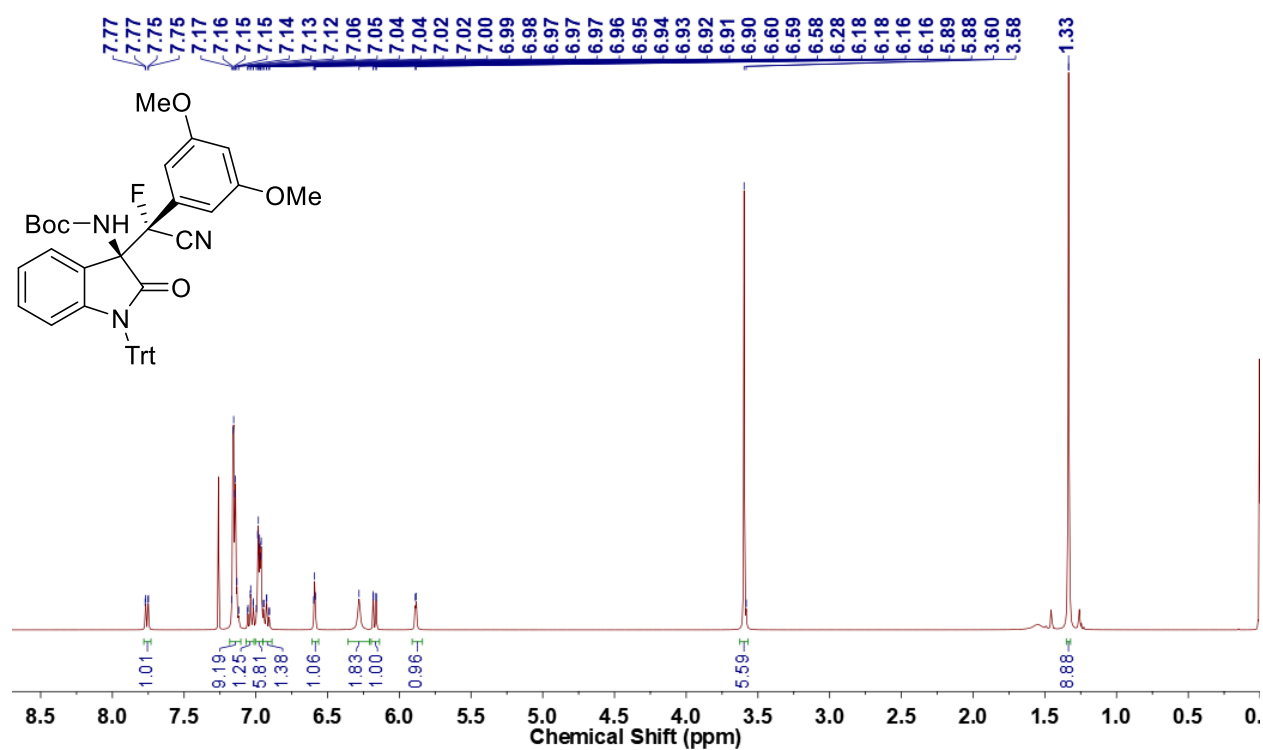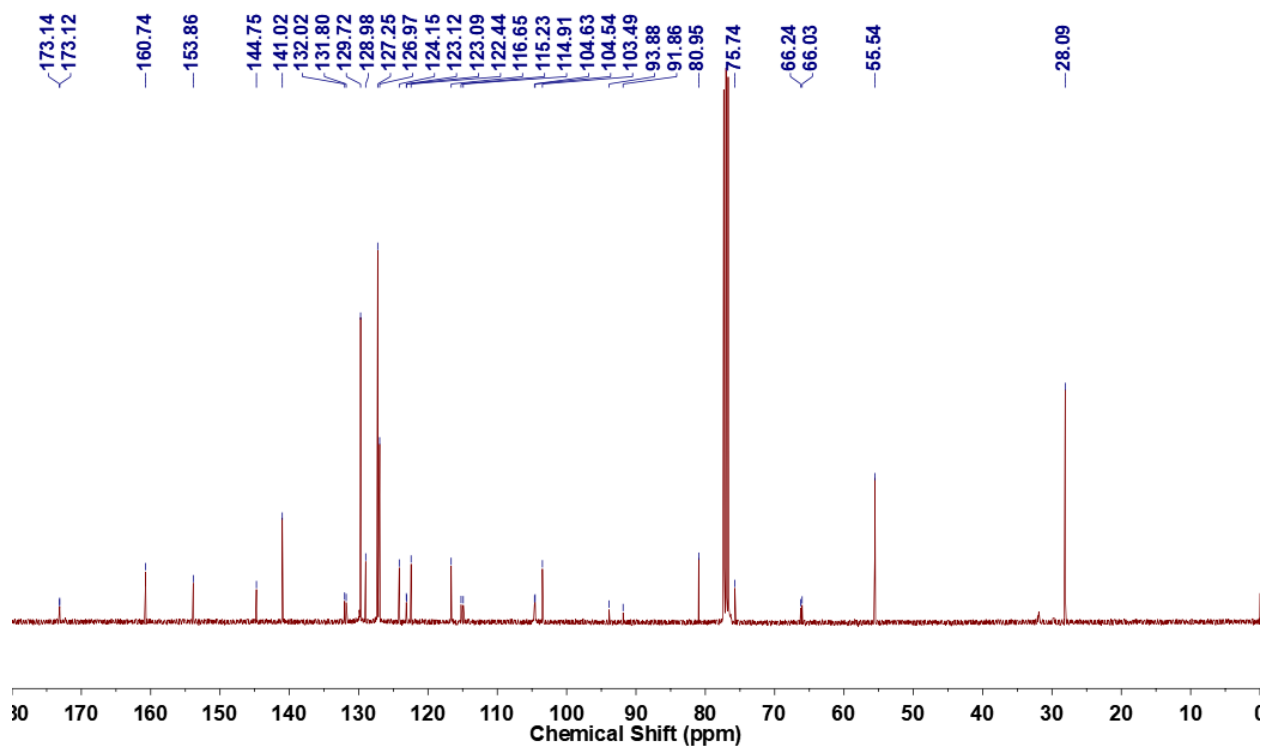

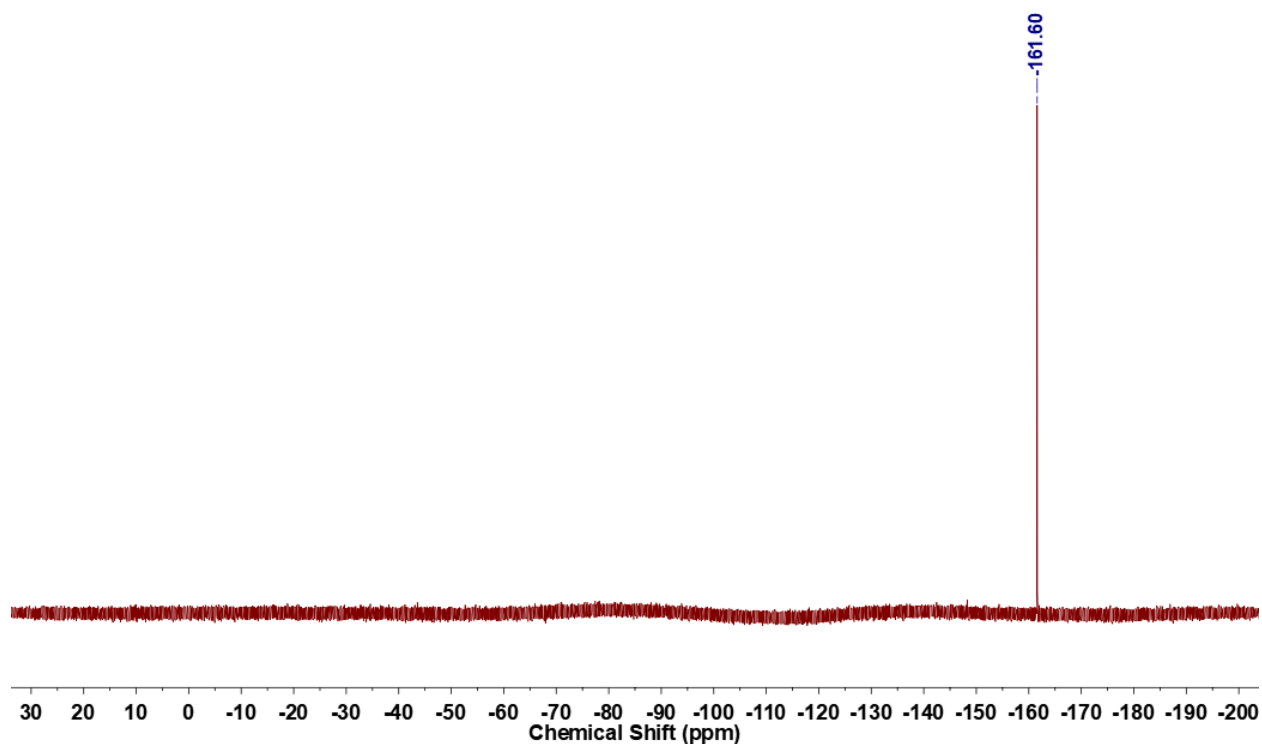

*tert*-Butyl ((*R*)-3-((*S*)-benzo[d][1,3]dioxol-5-yl(cyano)fluoromethyl)-2-oxo-1-tritylindolin-3-yl)carbamate (**3jb**)

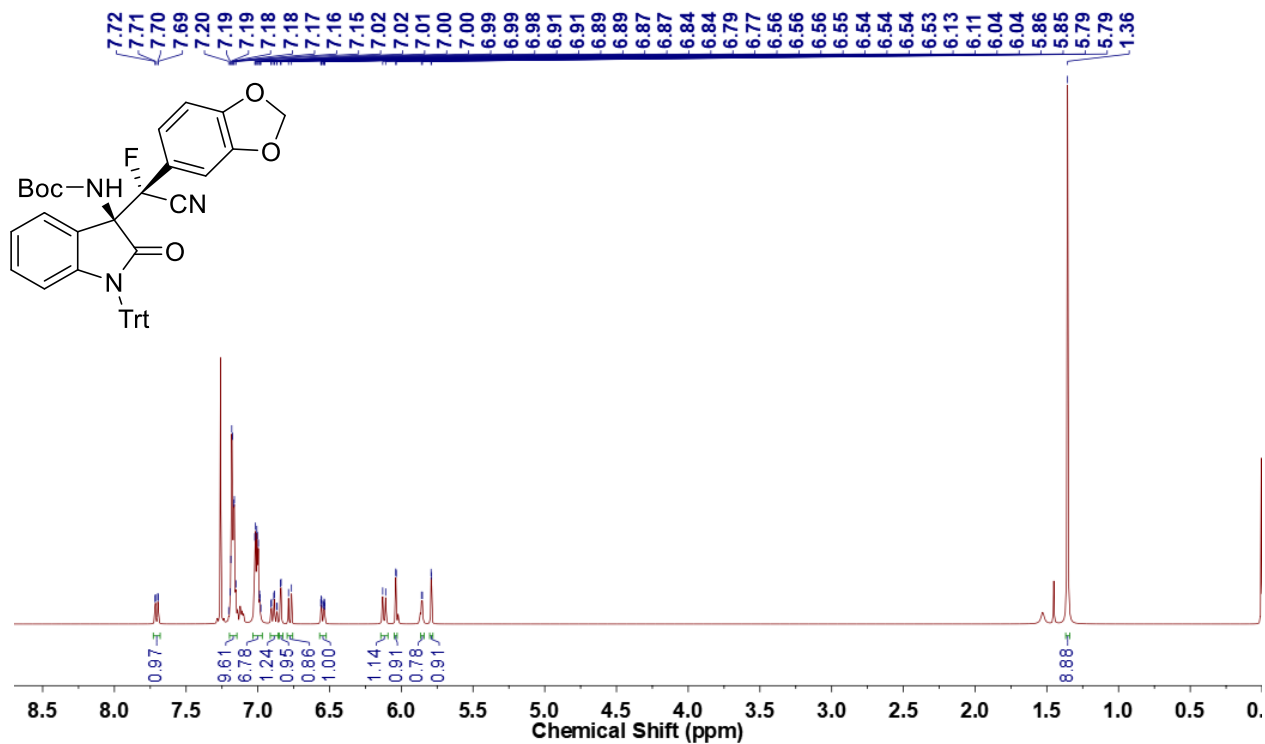

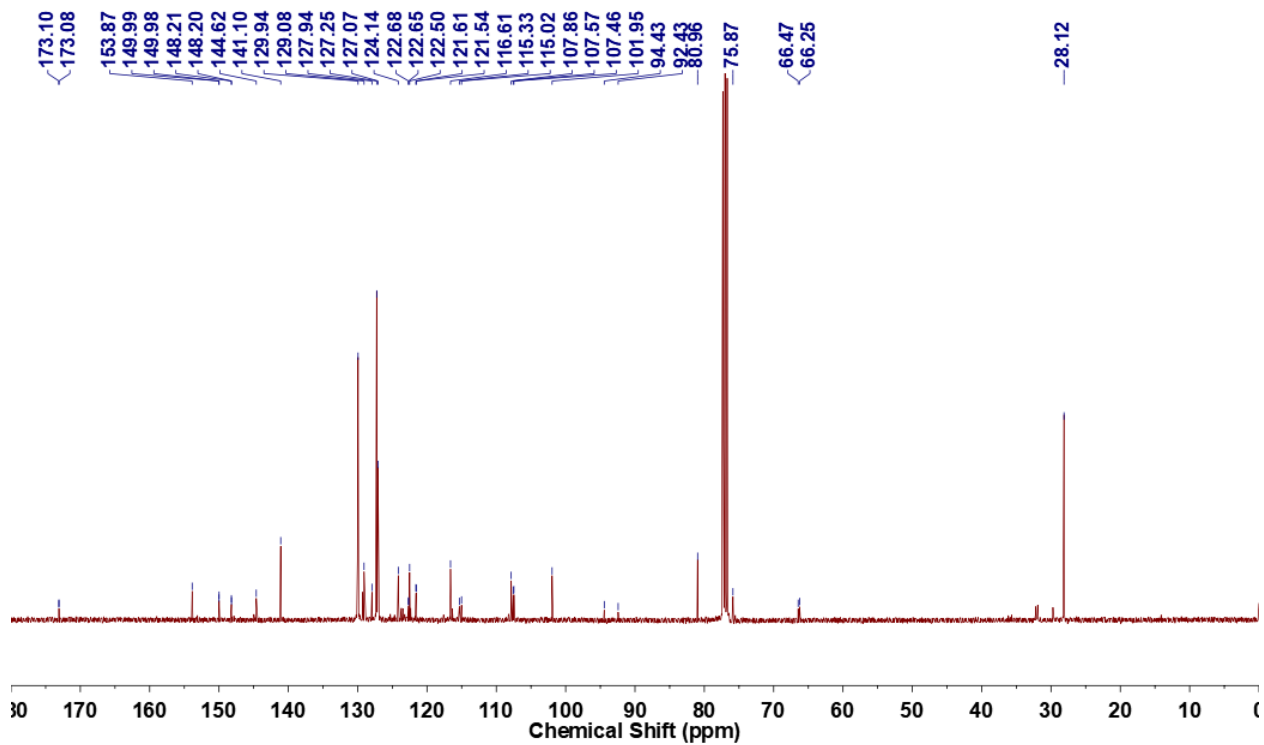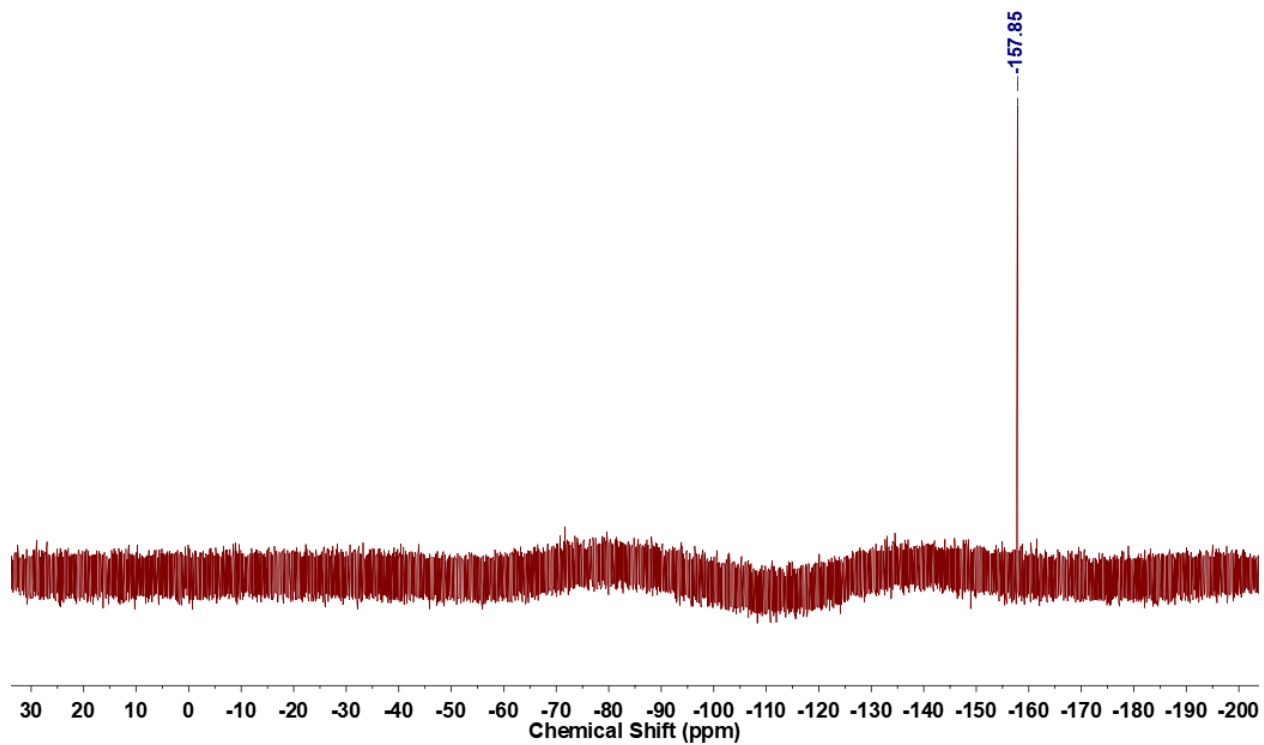

*tert*-Butyl ((*R*)-3-((*S*)-cyanofluoro(2-naphthyl)methyl)-2-oxo-1-tritylindolin-3-yl)carbamate  
(3kb)

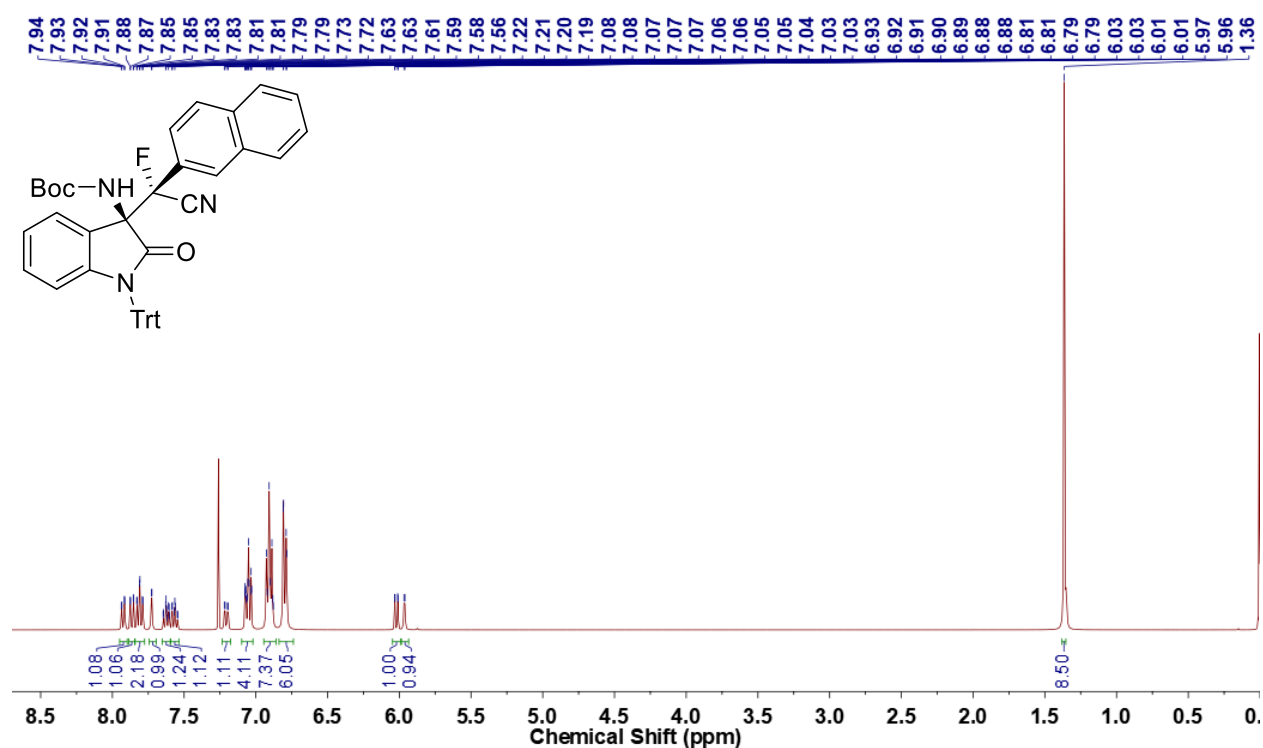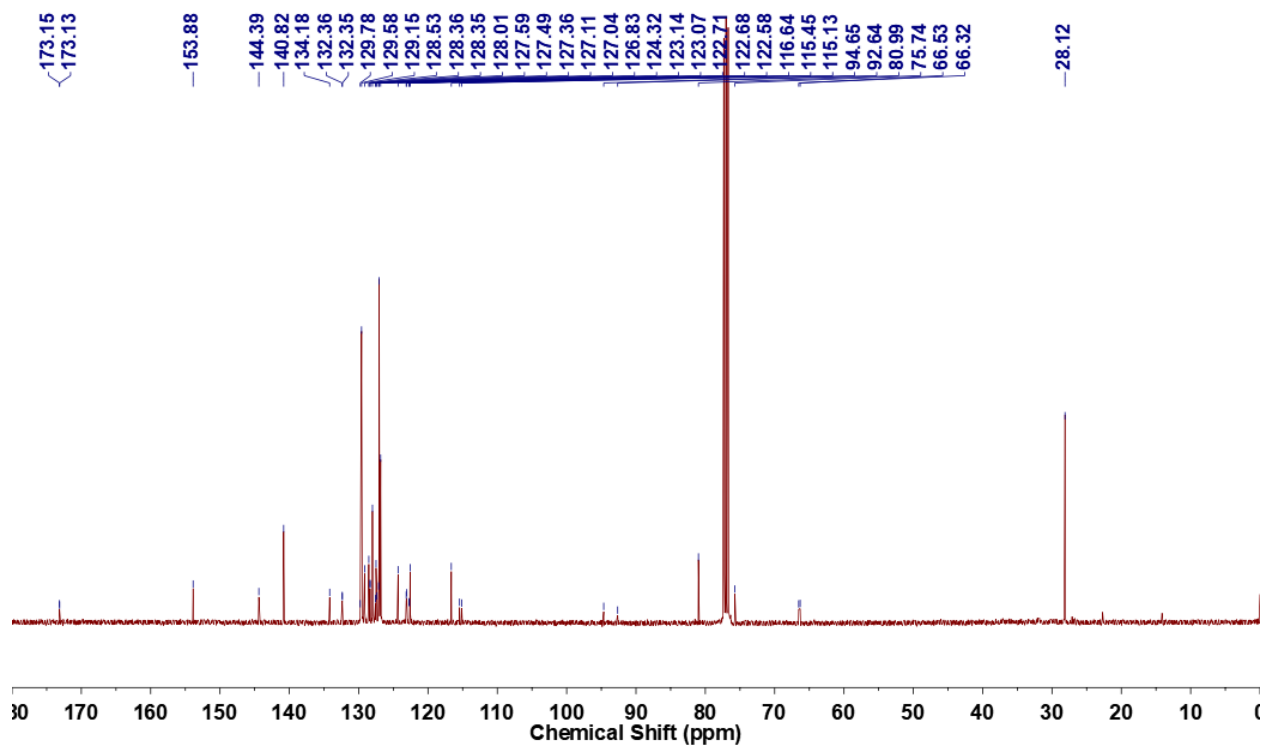

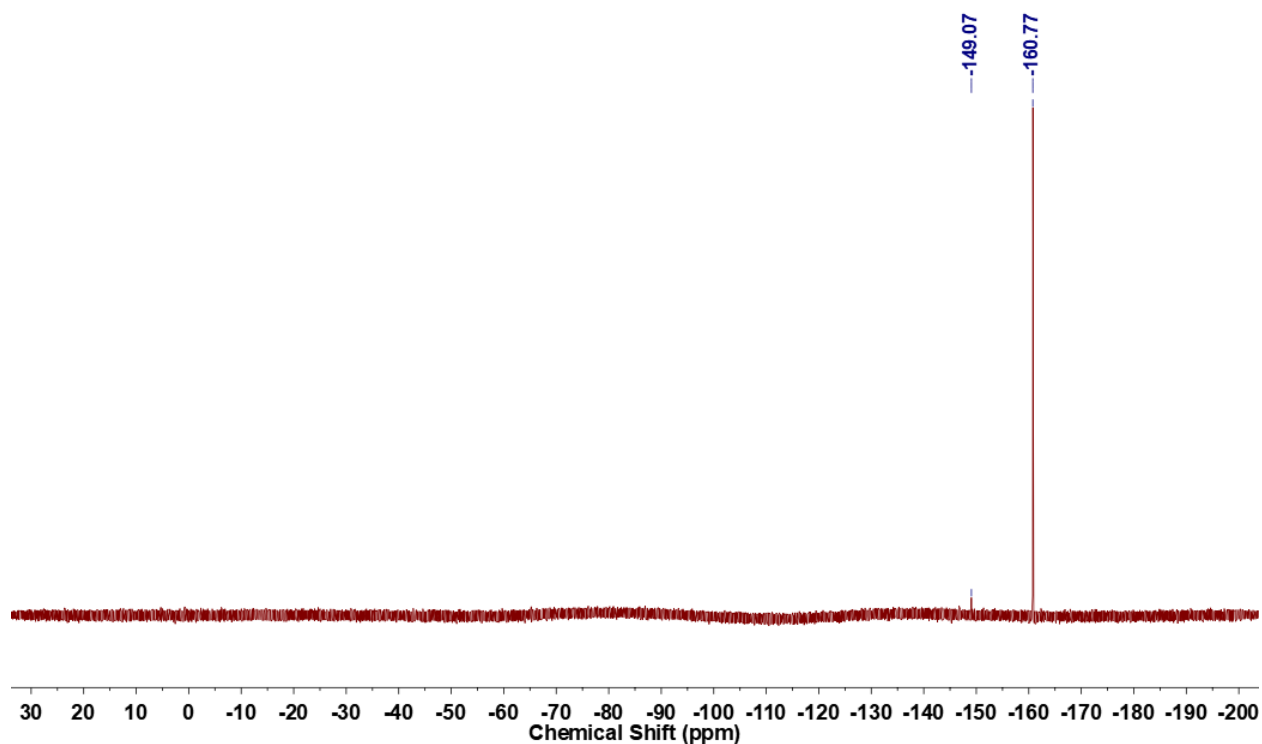

*tert*-Butyl ((*R*)-3-((*S*)-cyano(9H-fluoren-2-yl)fluoromethyl)-2-oxo-1-tritylindolin-3-yl)carbamate  
(**31b**)

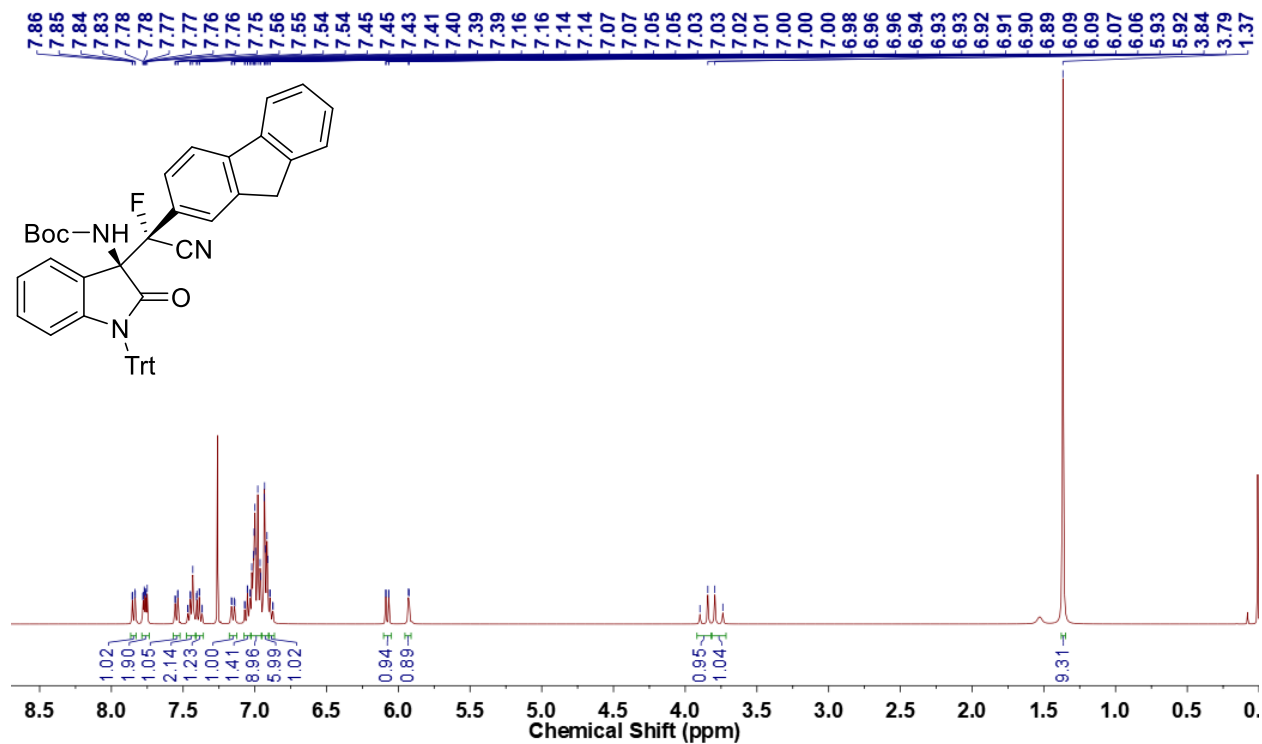

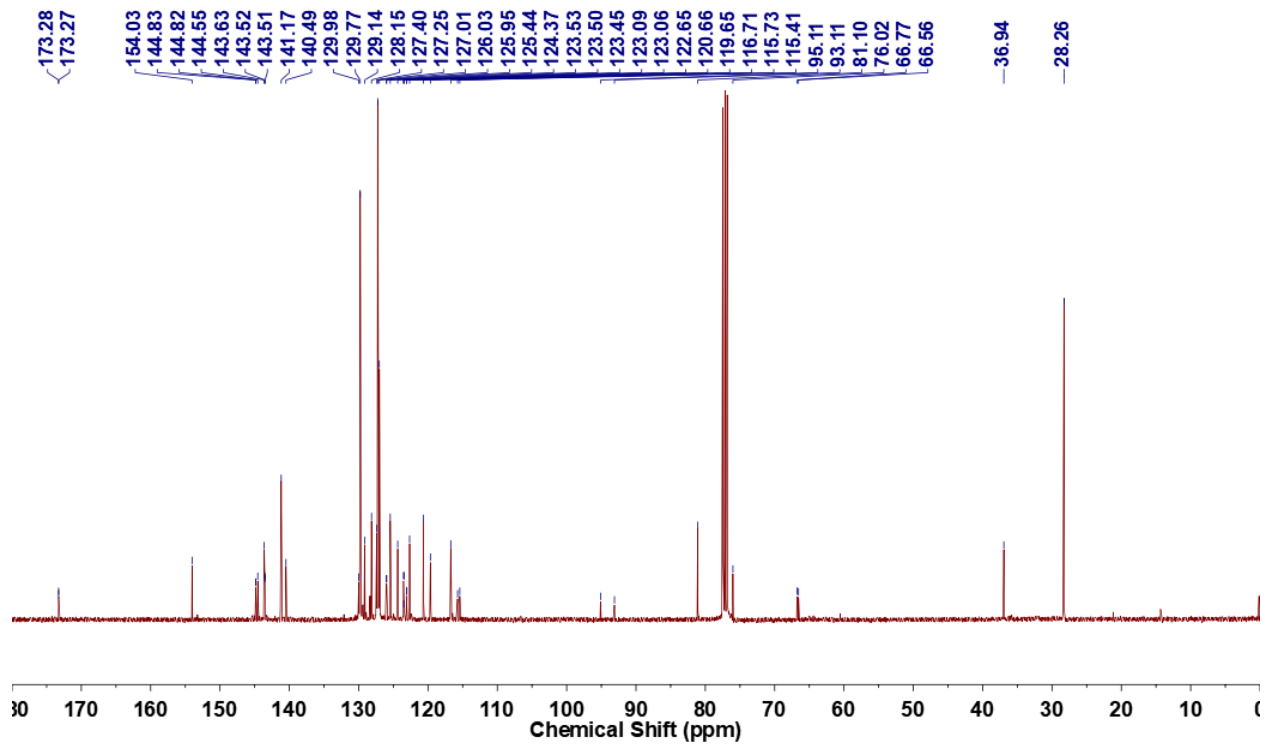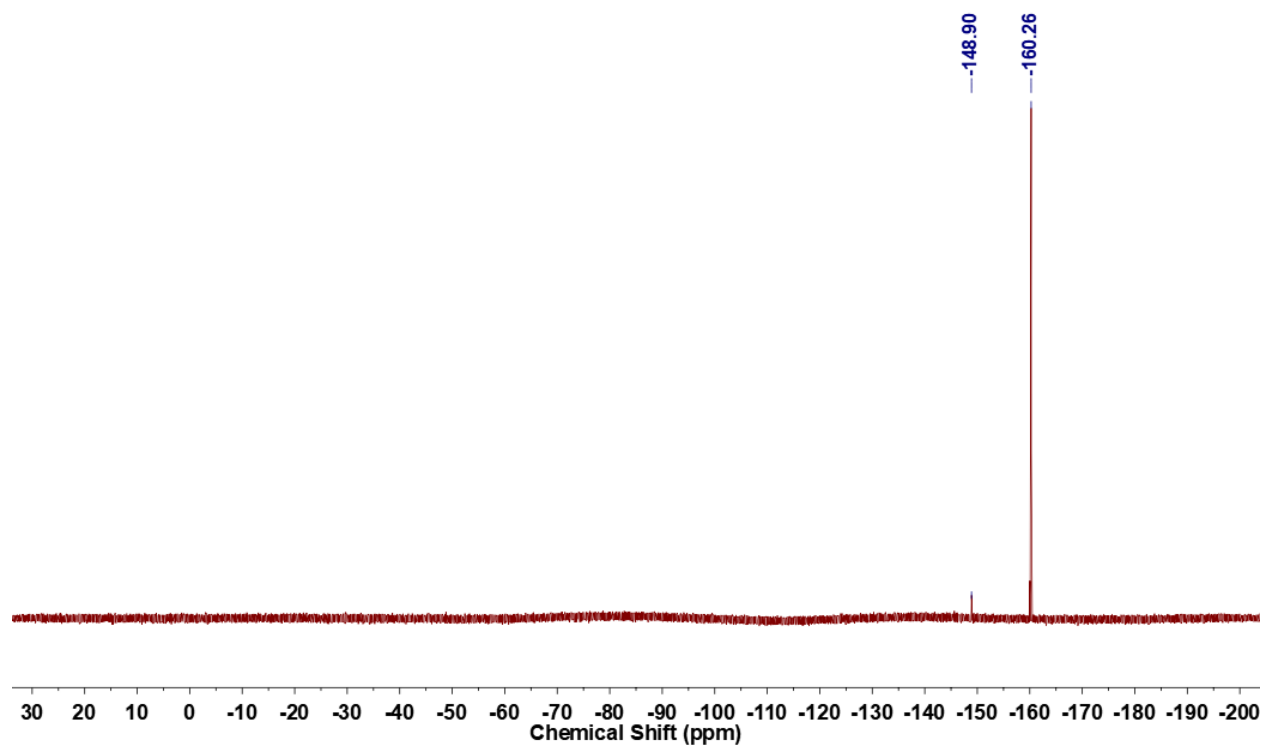

*tert*-Butyl ((*R*)-3-((*S*)-cyanofluoro(phenyl)methyl)-5-methyl-2-oxo-1-tritylindolin-3-yl)carbamate (**3ad**)

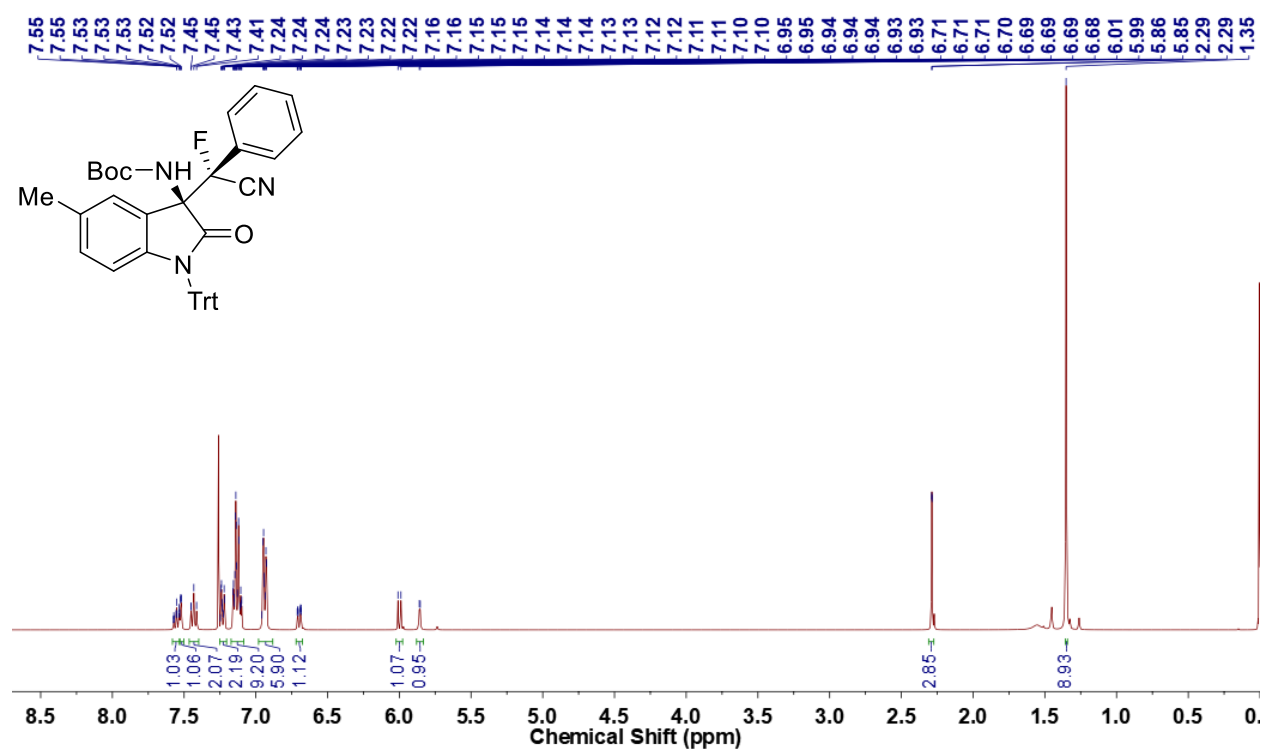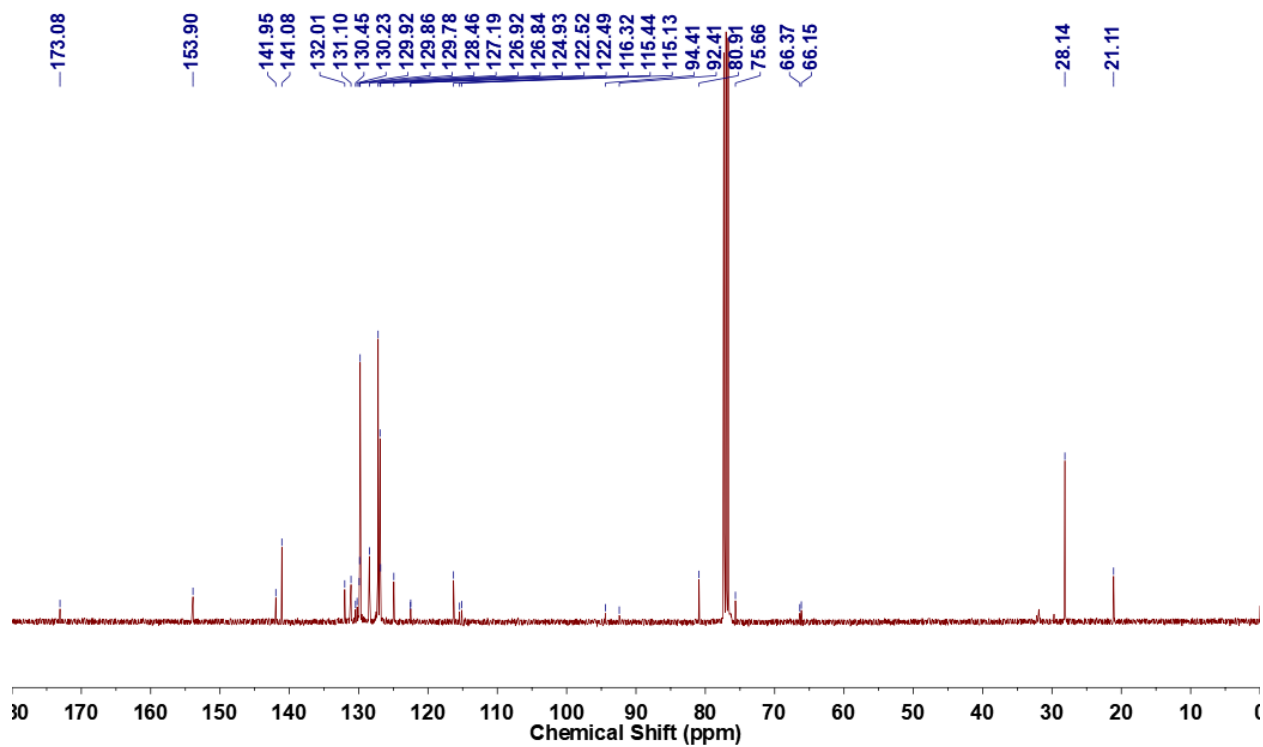

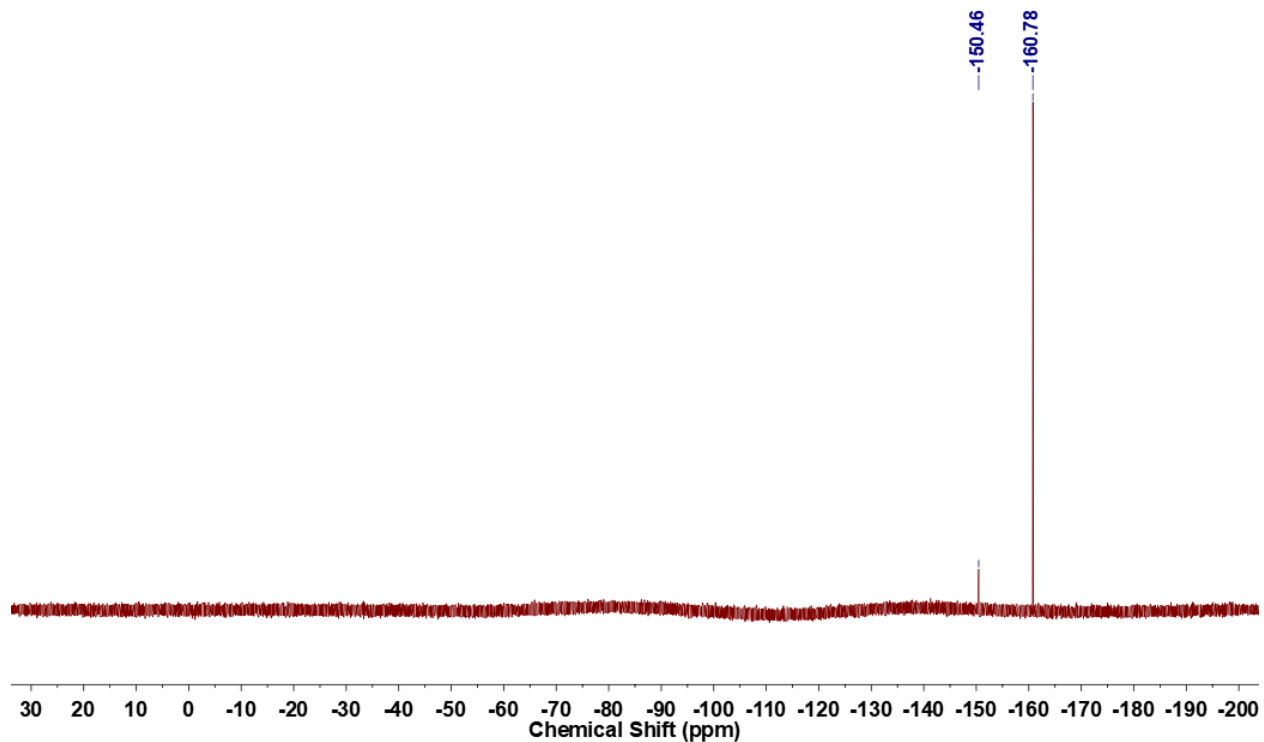

*tert*-Butyl ((*R*)-3-((*S*)-(3-bromophenyl)(cyano)fluoromethyl)-5-methyl-2-oxo-1-tritylindolin-3-yl)carbamate (**3cd**)

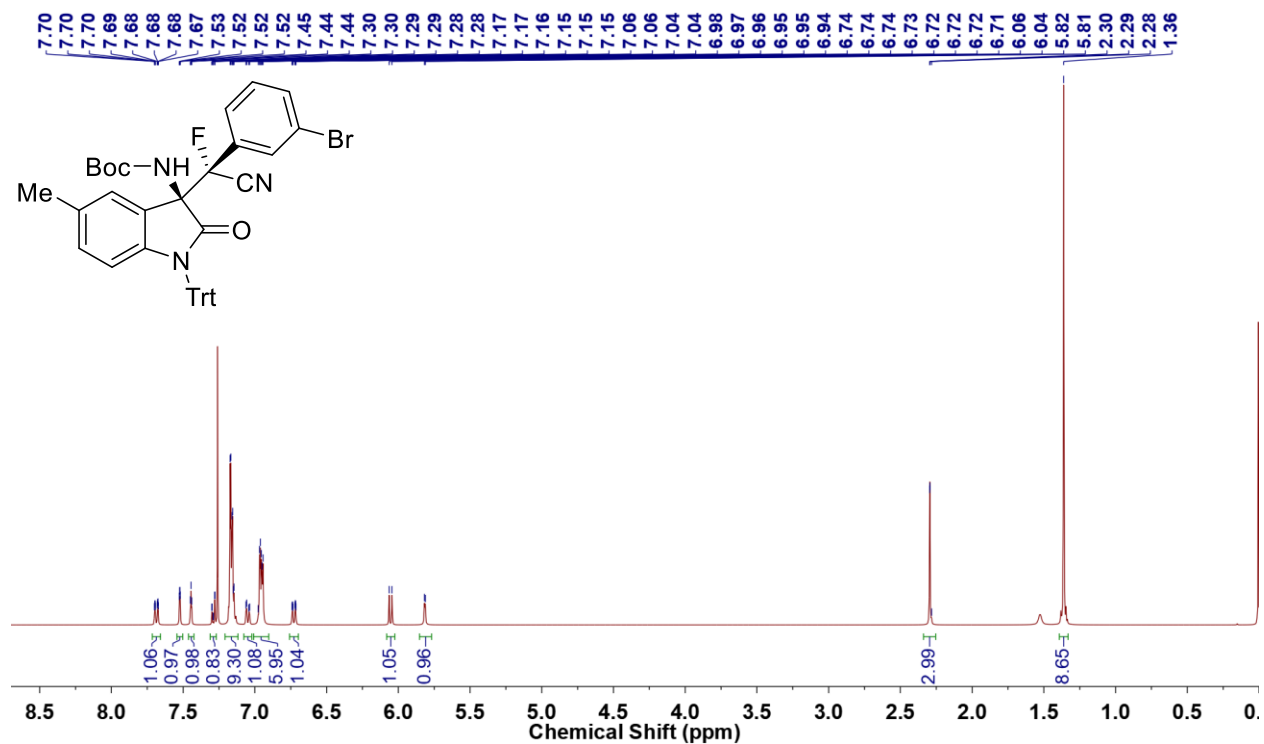



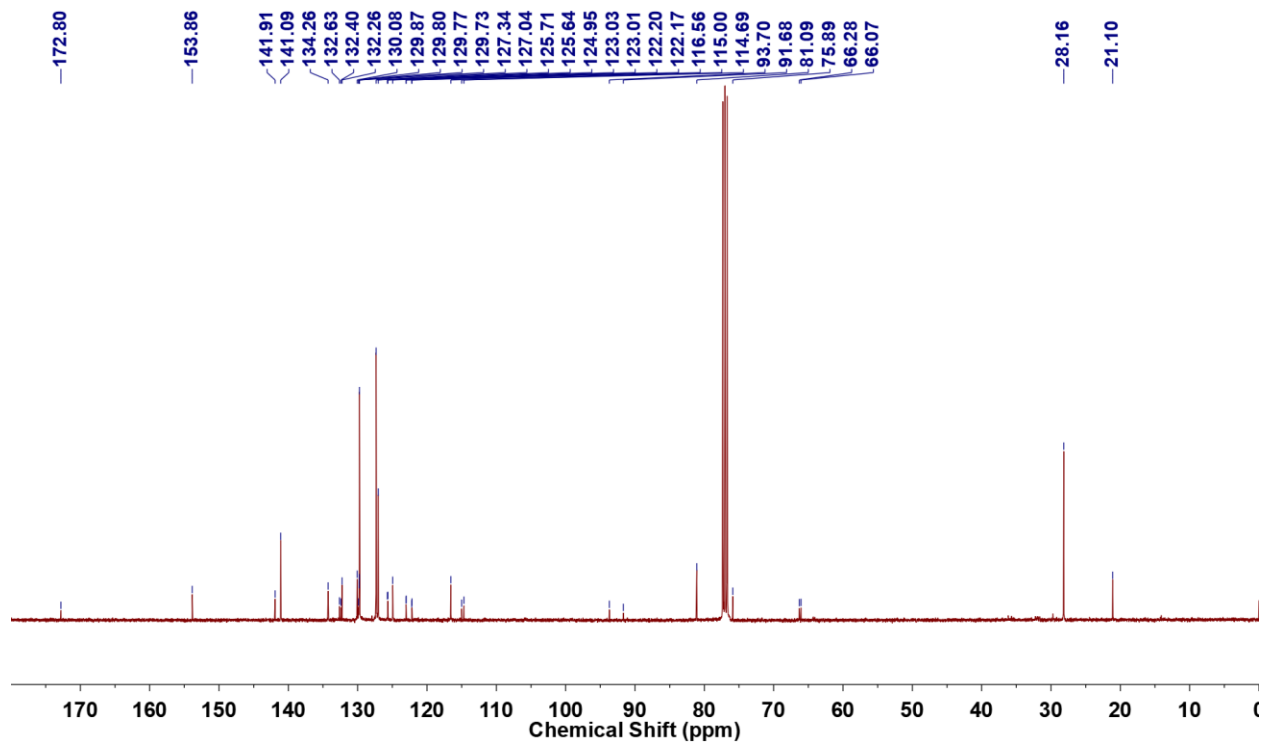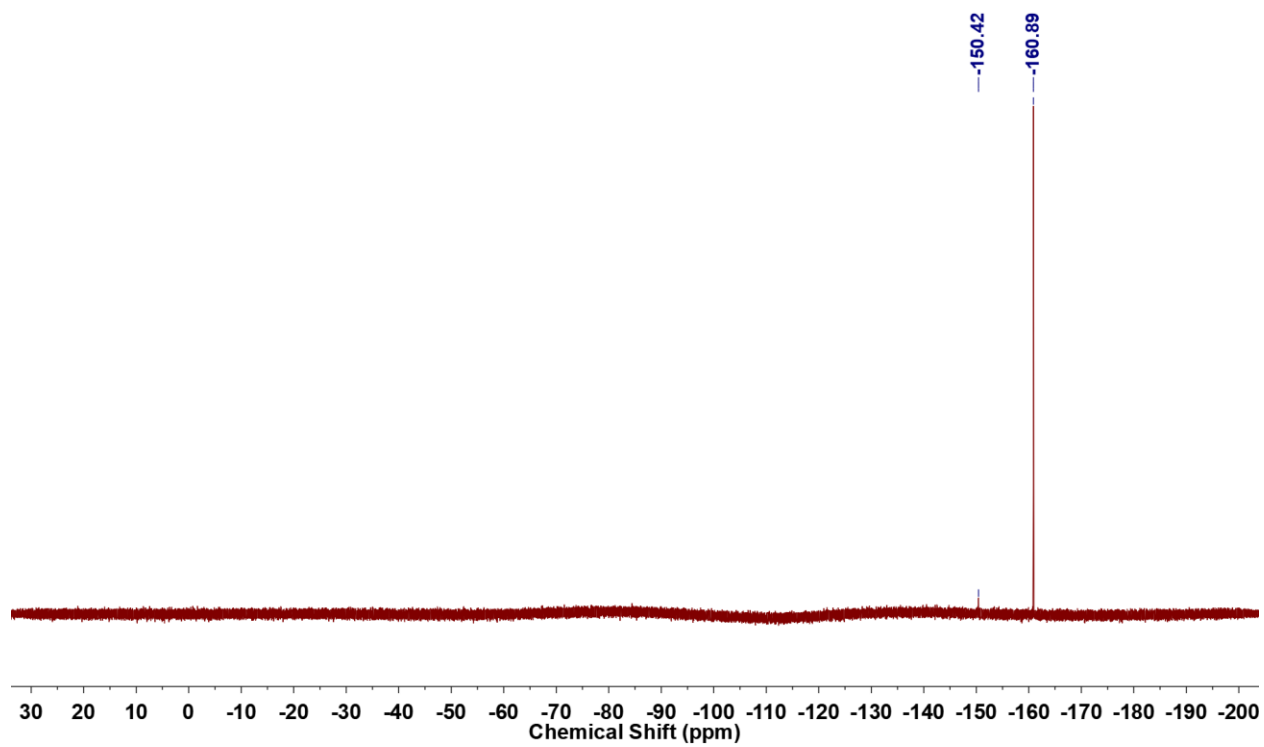

*tert*-Butyl ((*R*)-3-((*S*)-(3-chlorophenyl)(cyano)fluoromethyl)-5-ethyl-2-oxo-1-tritylindolin-3-yl)carbamate (**3be**)

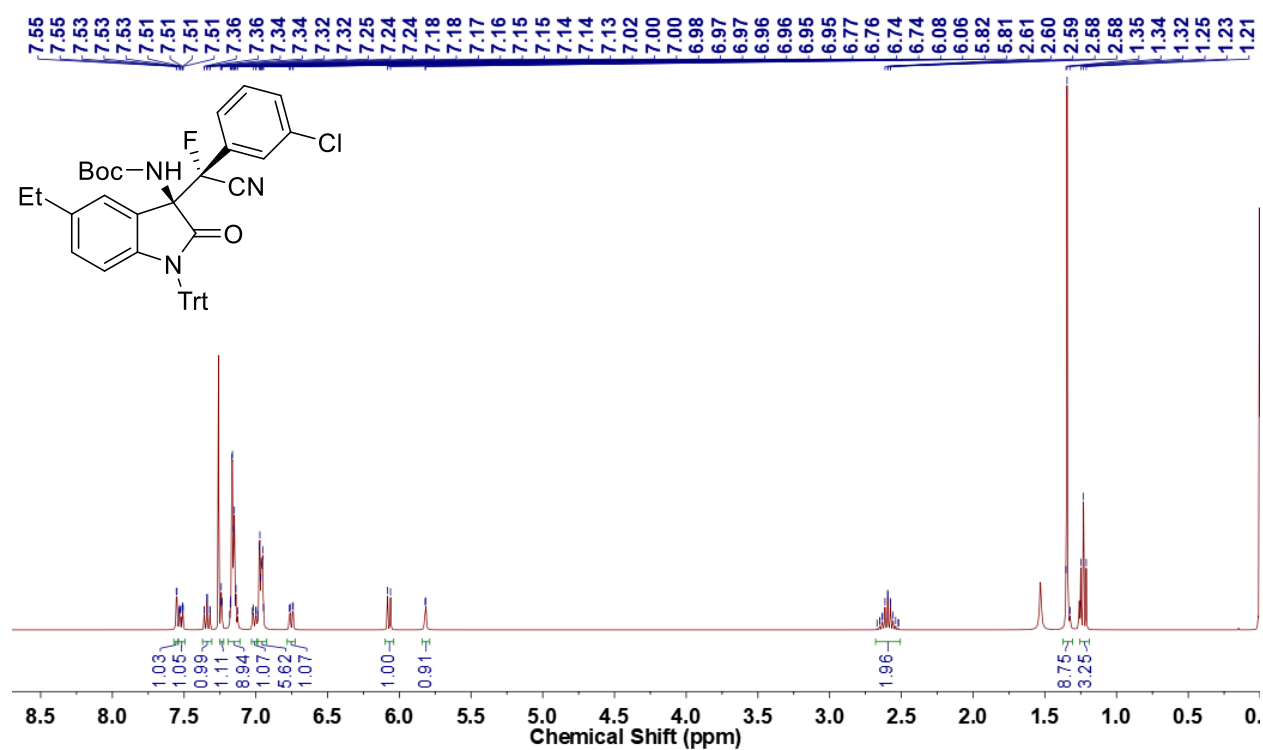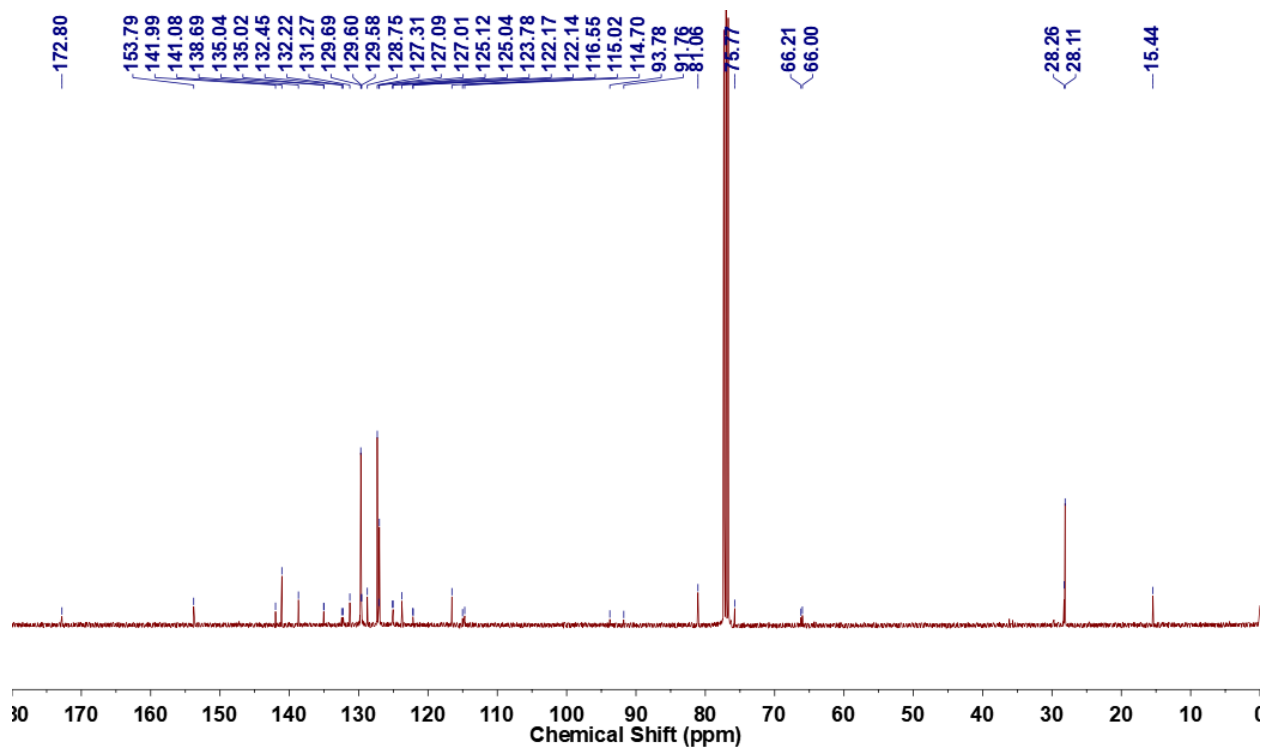

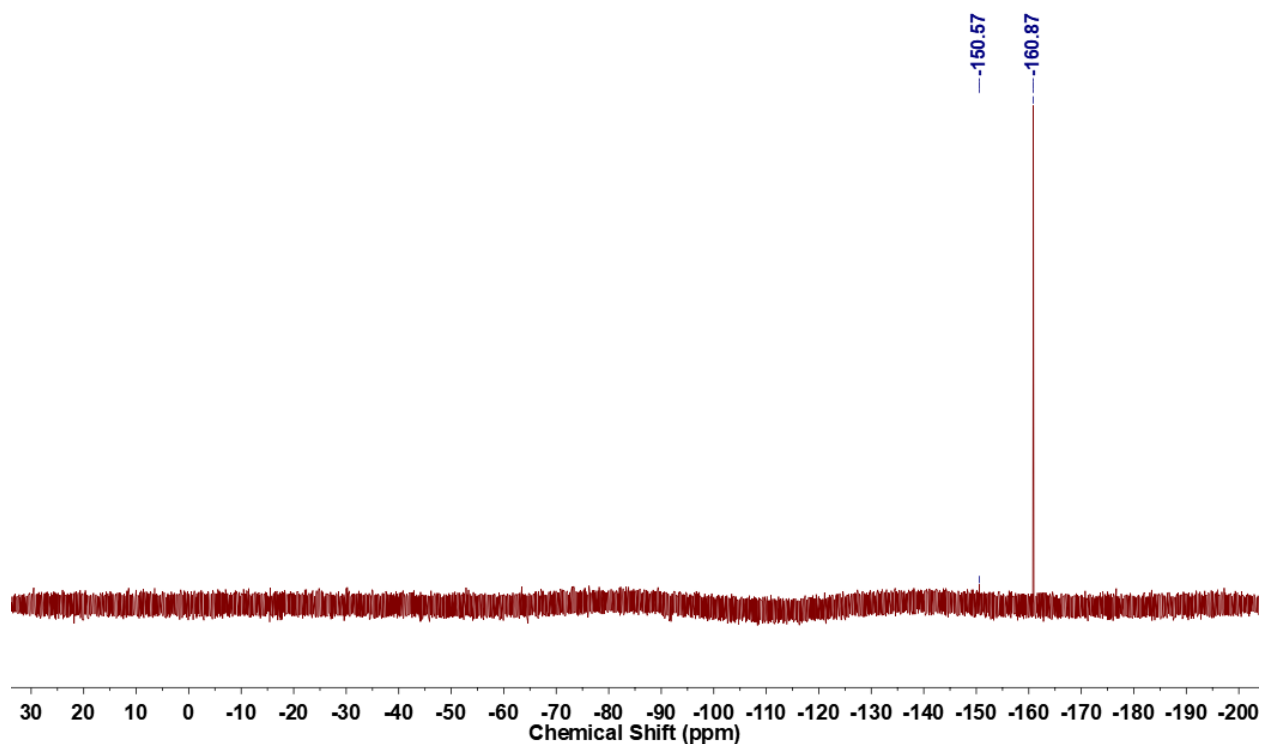

*tert*-Butyl ((*R*)-3-((*S*)-cyanofluoro(phenyl)methyl)-6-methoxy-2-oxo-1-tritylindolin-3-yl)carbamate (**3af**)

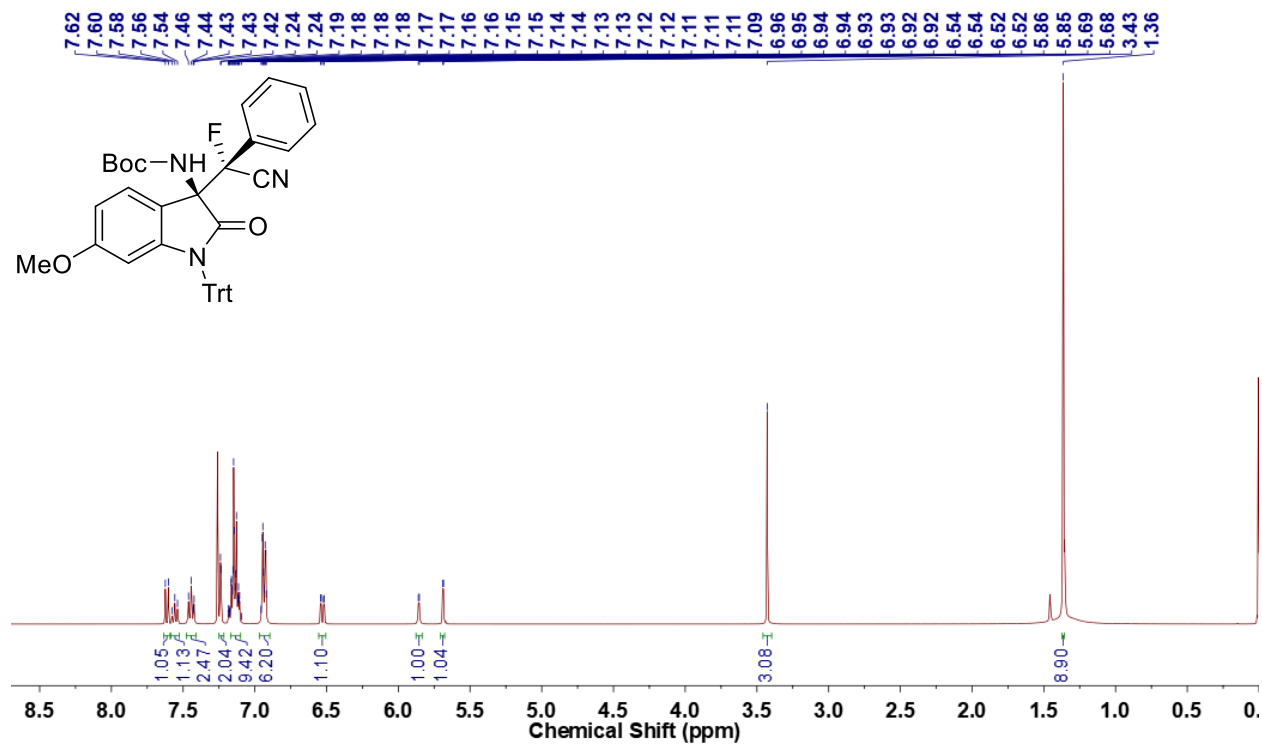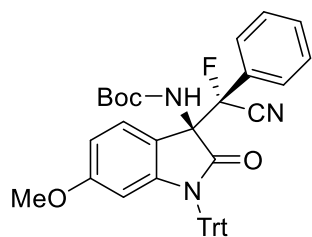

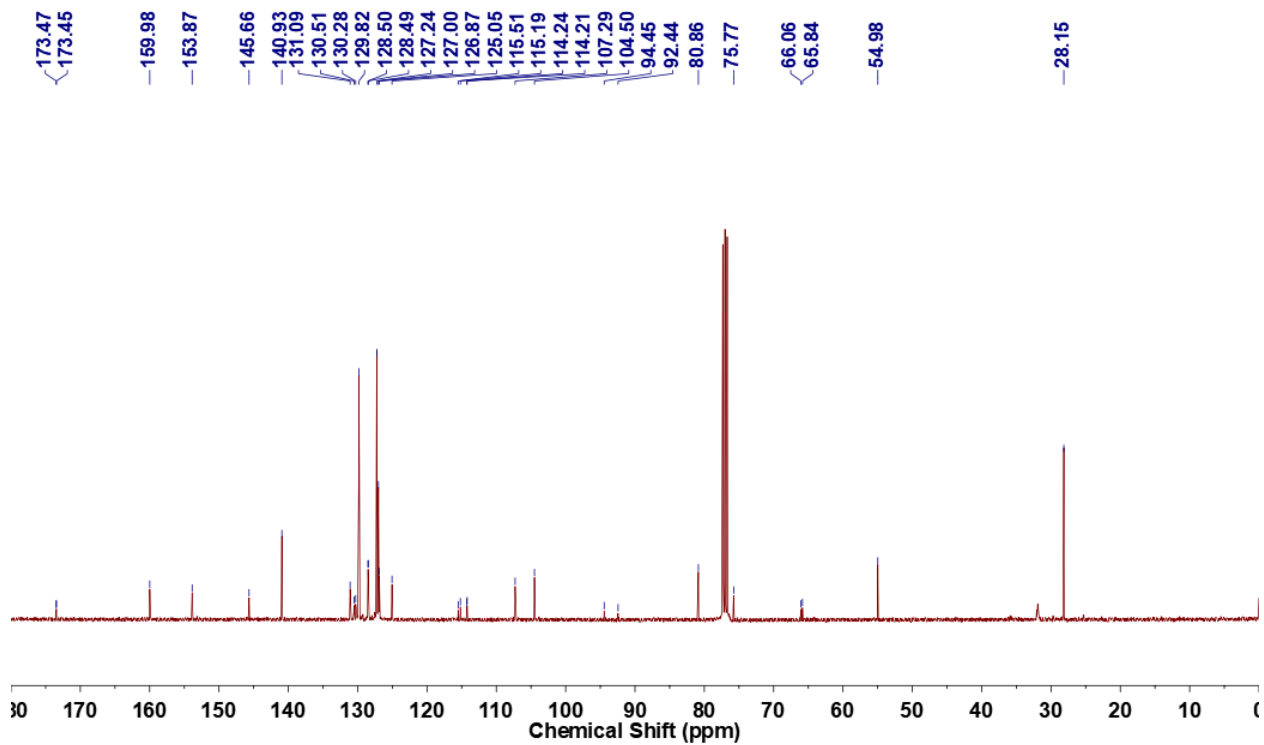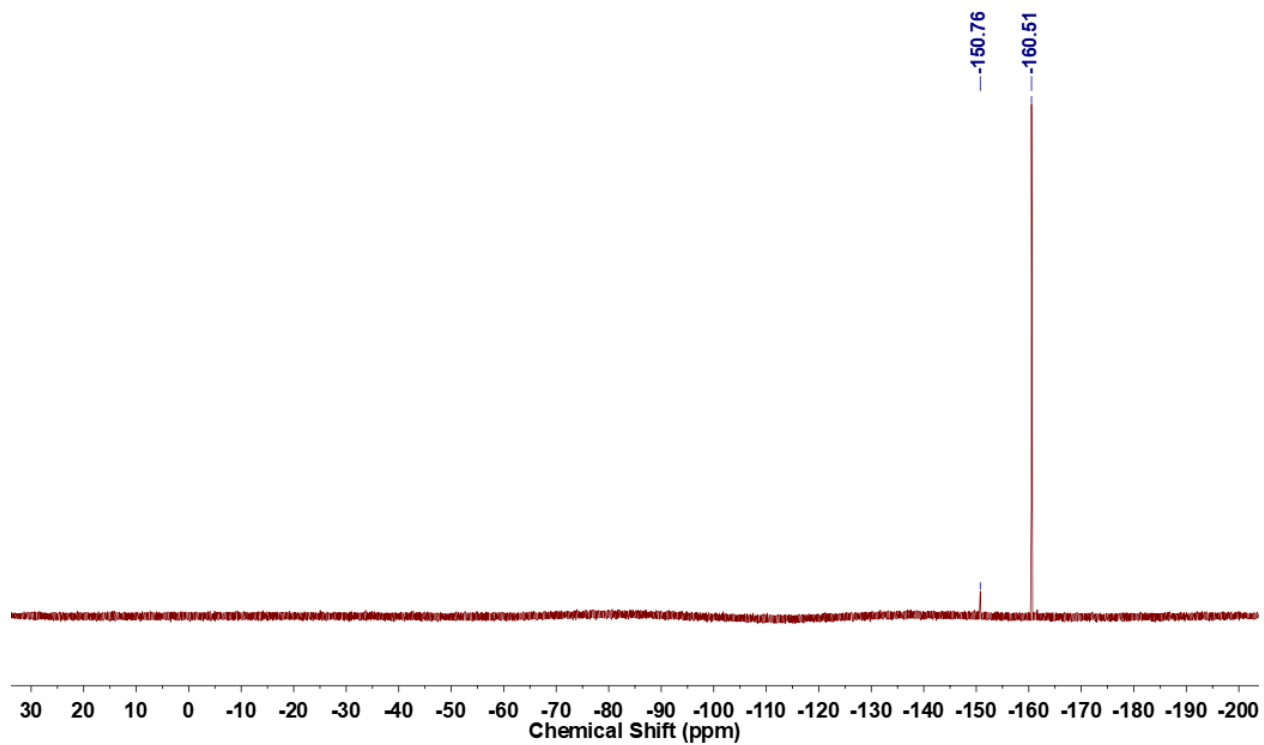

*tert*-Butyl ((*R*)-3-((*S*)-cyano fluoro(phenyl)methyl)-6-methyl-2-oxo-1-tritylindolin-3-yl)carbamate (**3ag**)

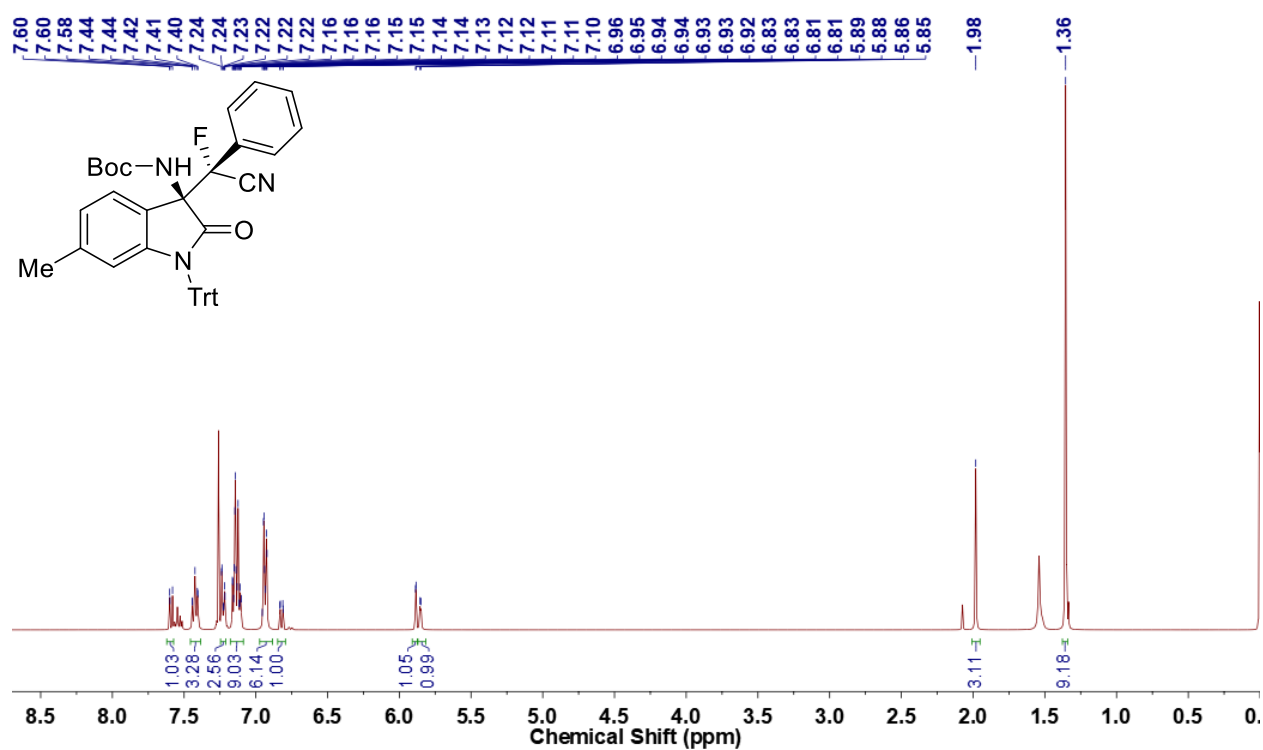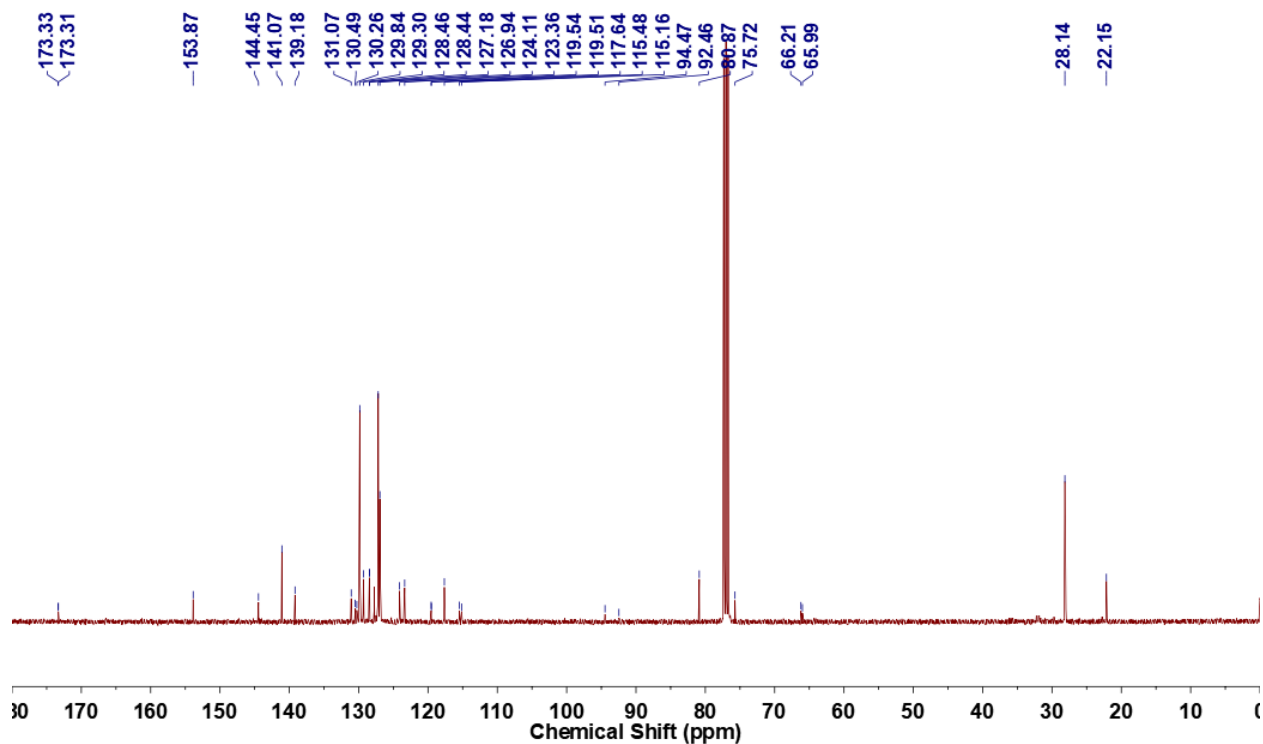

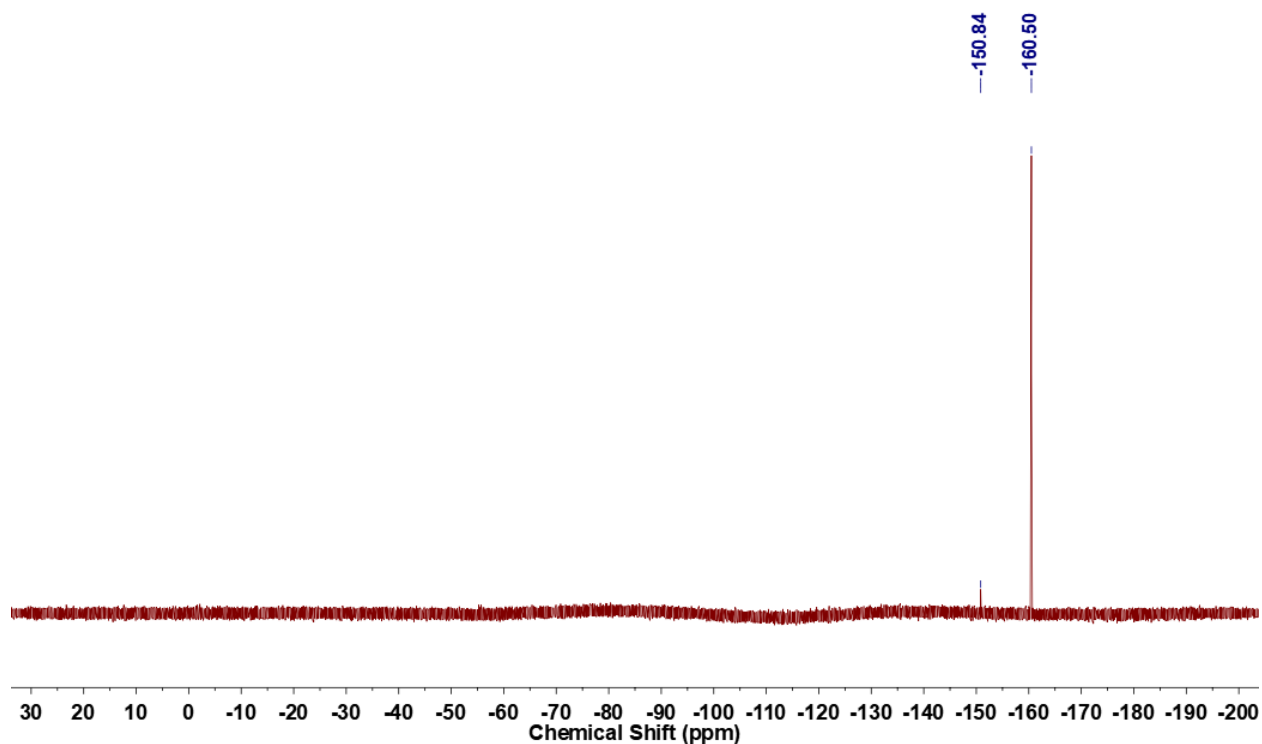

*tert*-Butyl ((*R*)-3-((*S*)-(3-chlorophenyl)(cyano)fluoromethyl)-5-methoxy-2-oxo-1-tritylindolin-3-yl)carbamate (**3bh**)

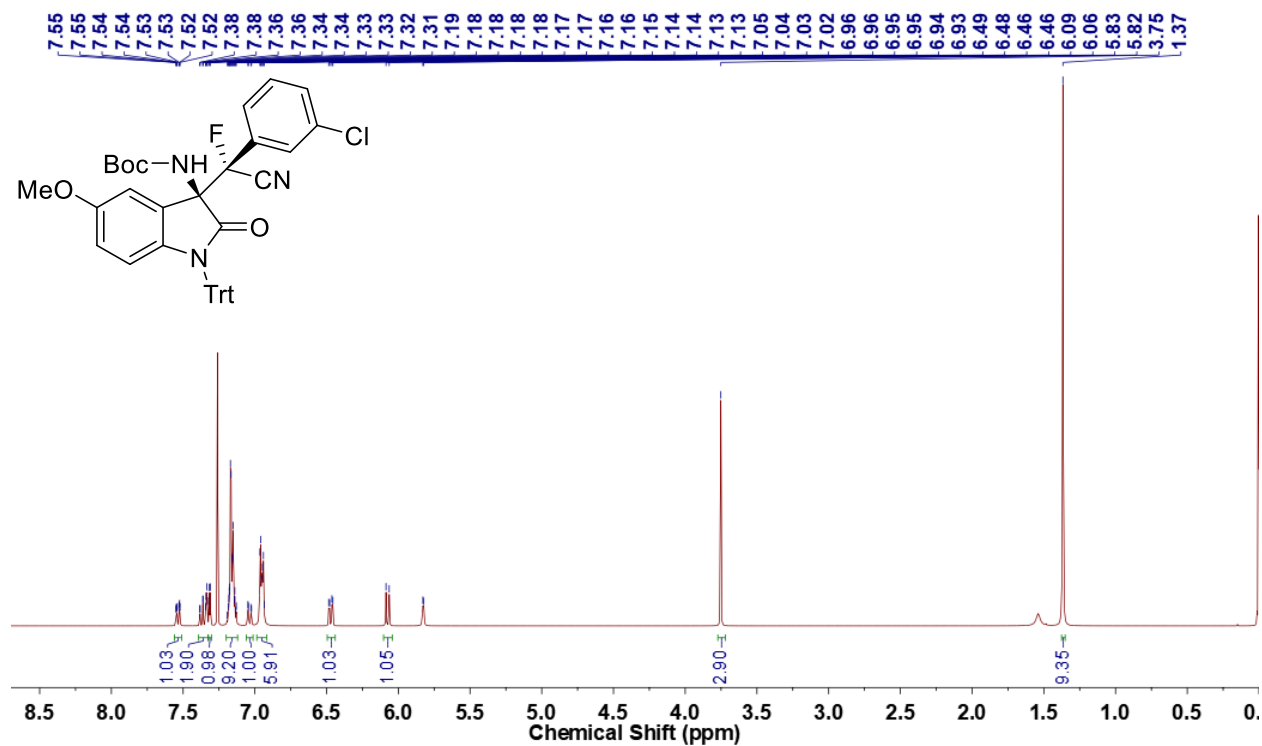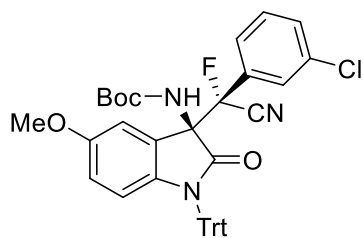

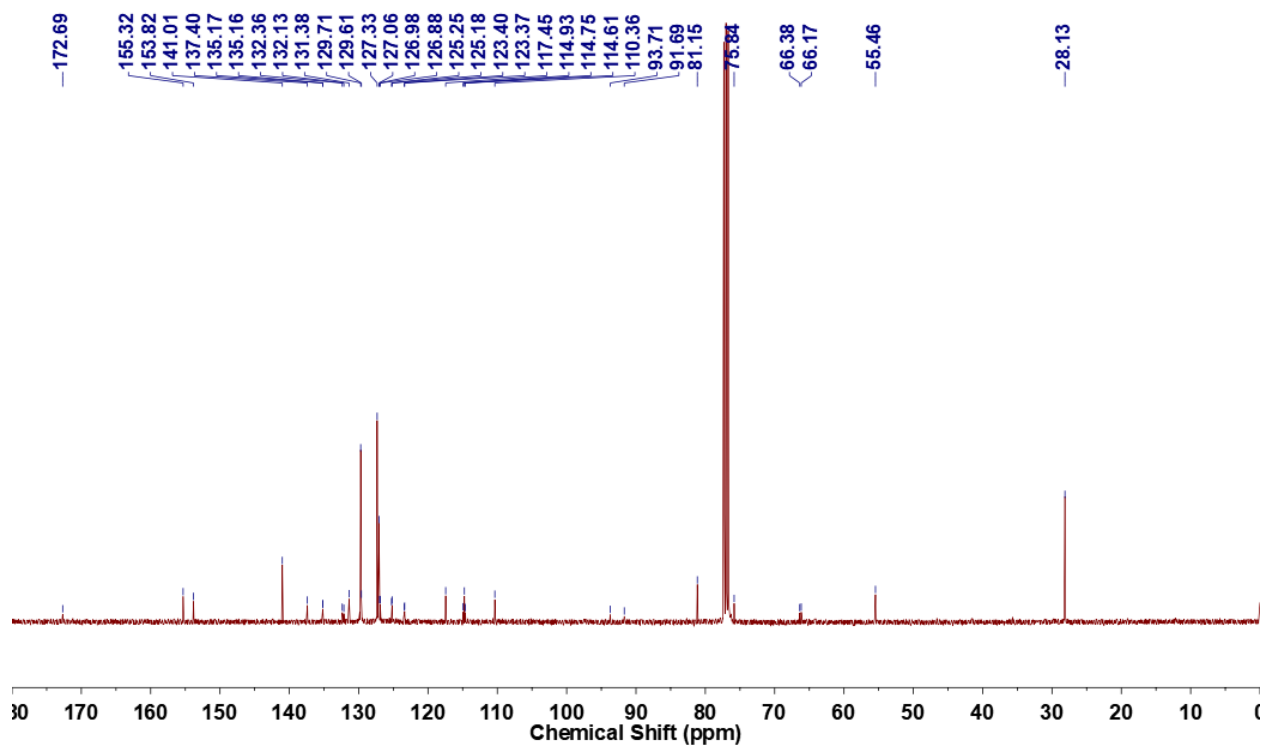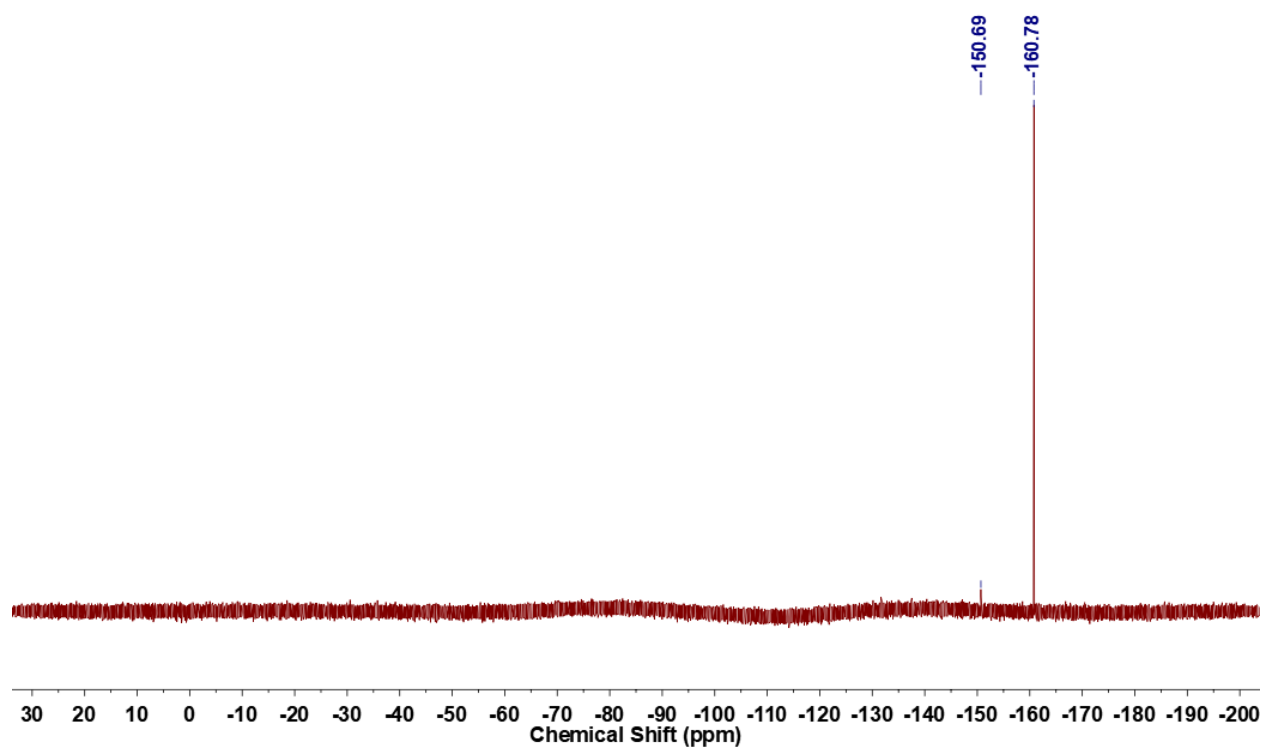

*tert*-Butyl ((*S*)-3-((*S*)-(cyanofluoro(phenyl)methyl)-2-oxo-1-phenylindolin-3-yl)carbamate (**3ac**)

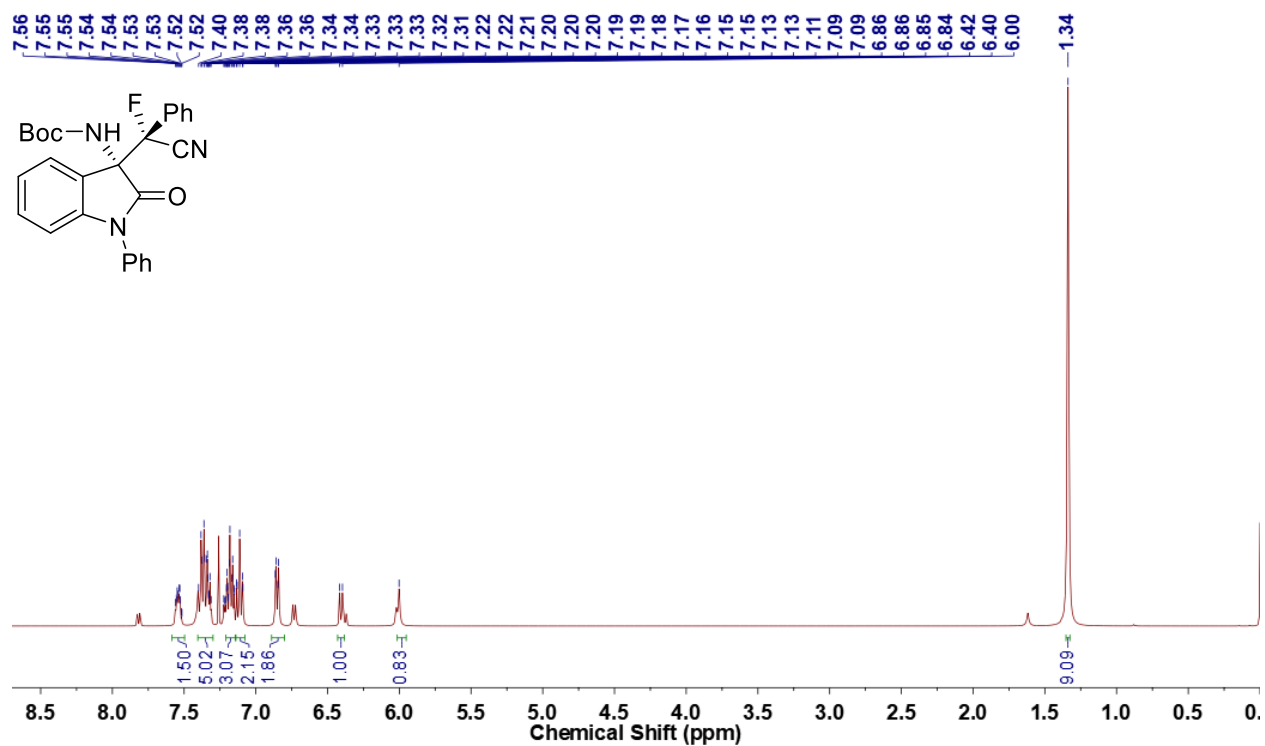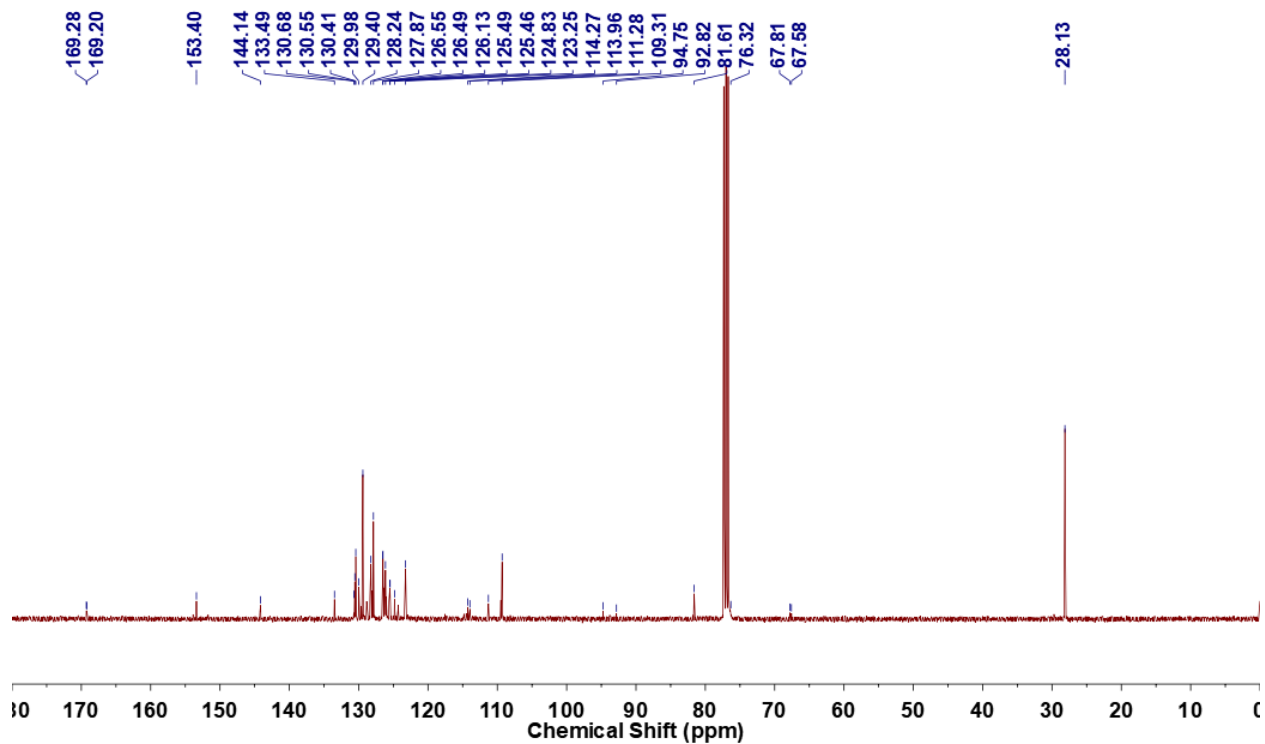



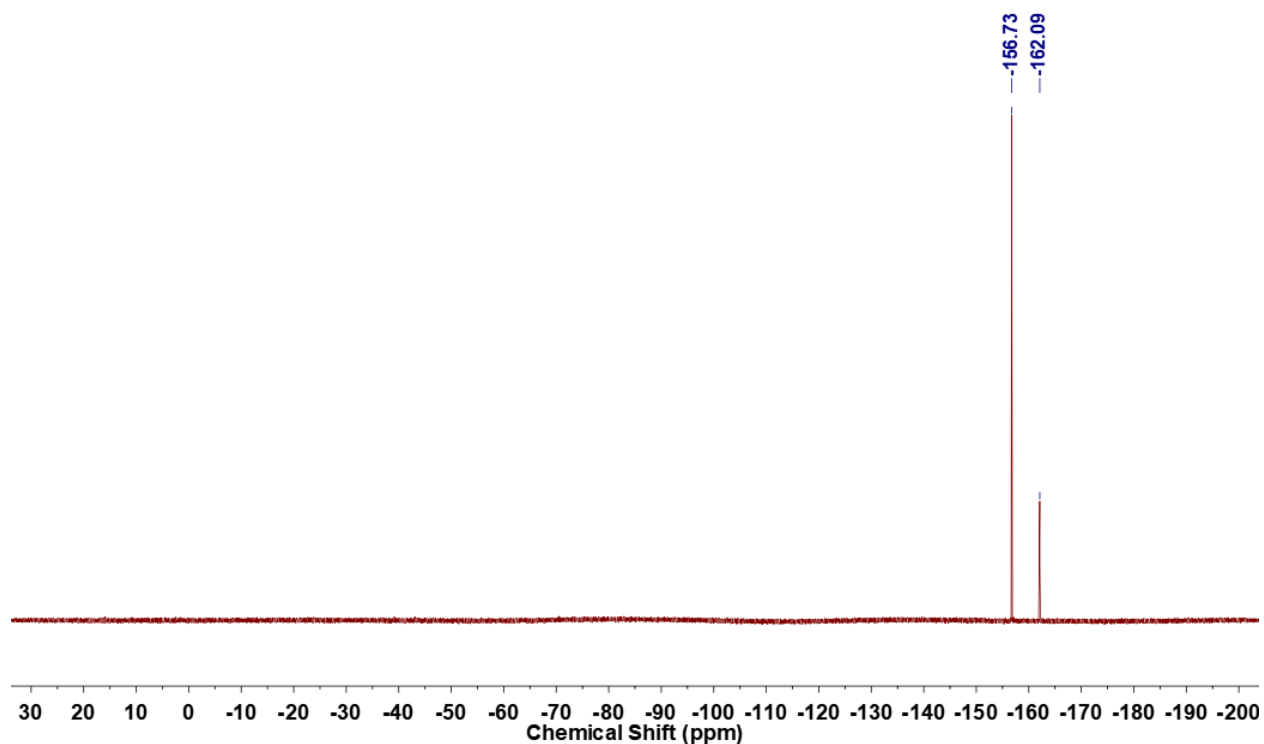

*tert*-Butyl ((*S*)-3-((*S*)-(cyanofluoro(3-chlorophenyl)methyl)-2-oxo-1-phenylindolin-3-yl)carbamate (**3bc**)

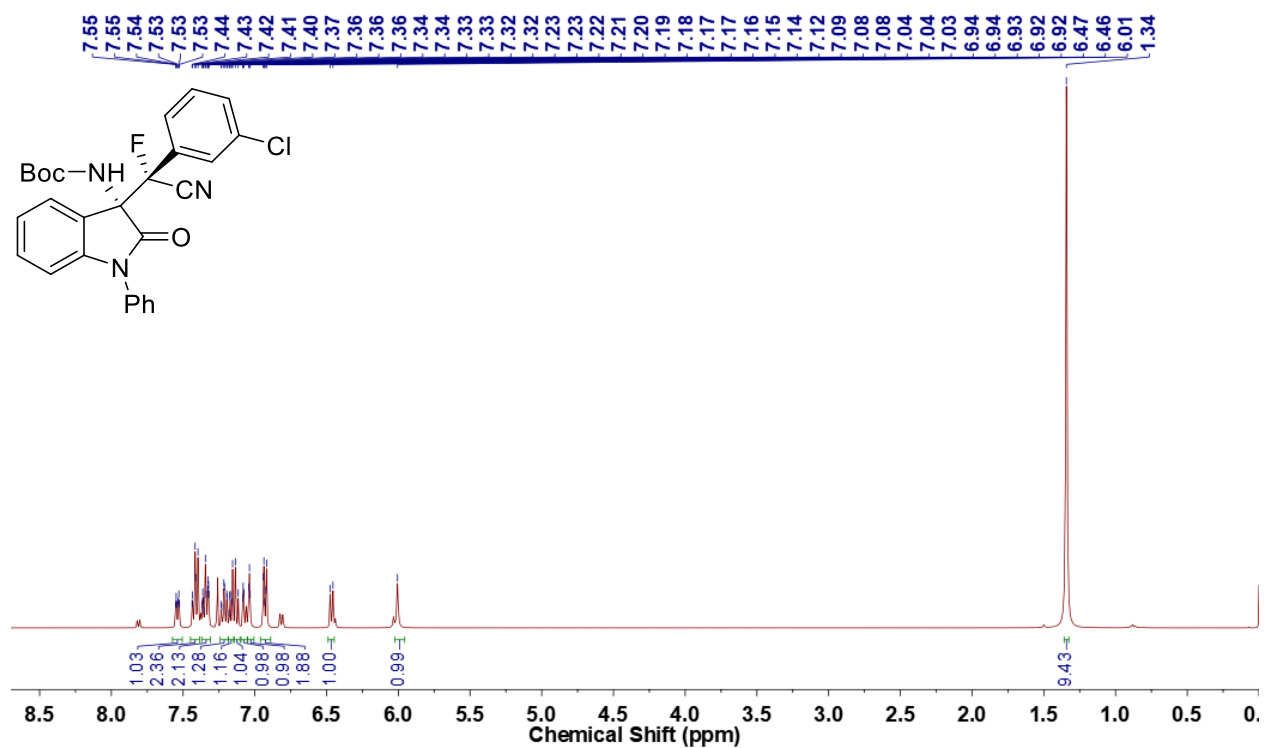

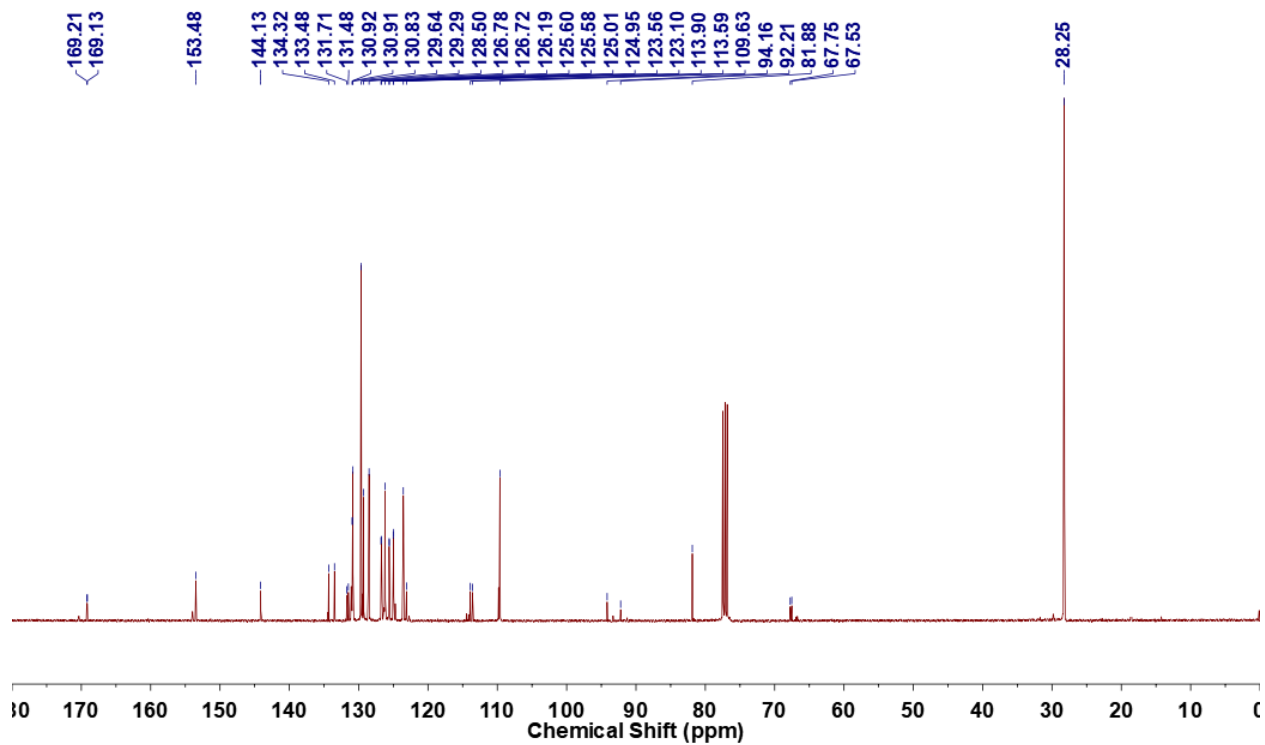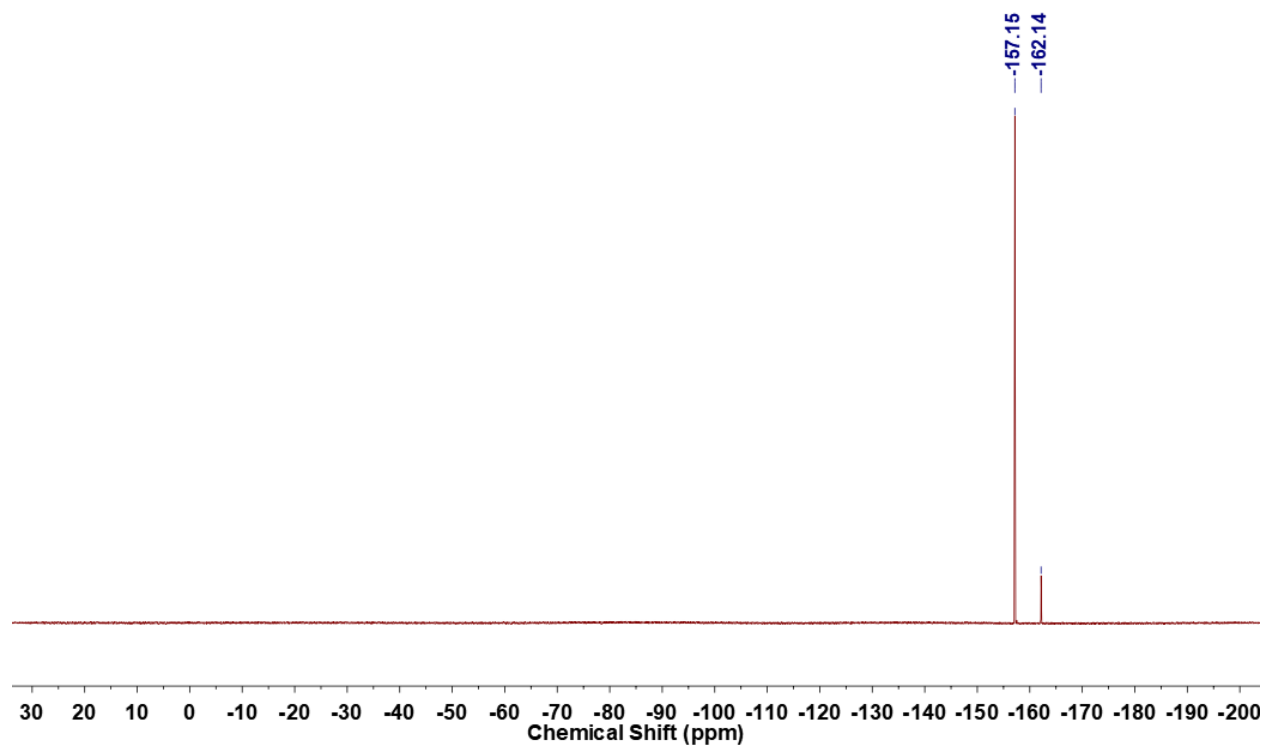

*tert*-Butyl ((*S*)-3-((*S*)-(cyanofluoro(3-methoxyphenyl)methyl)-2-oxo-1-phenylindolin-3-yl)carbamate (**3ec**)

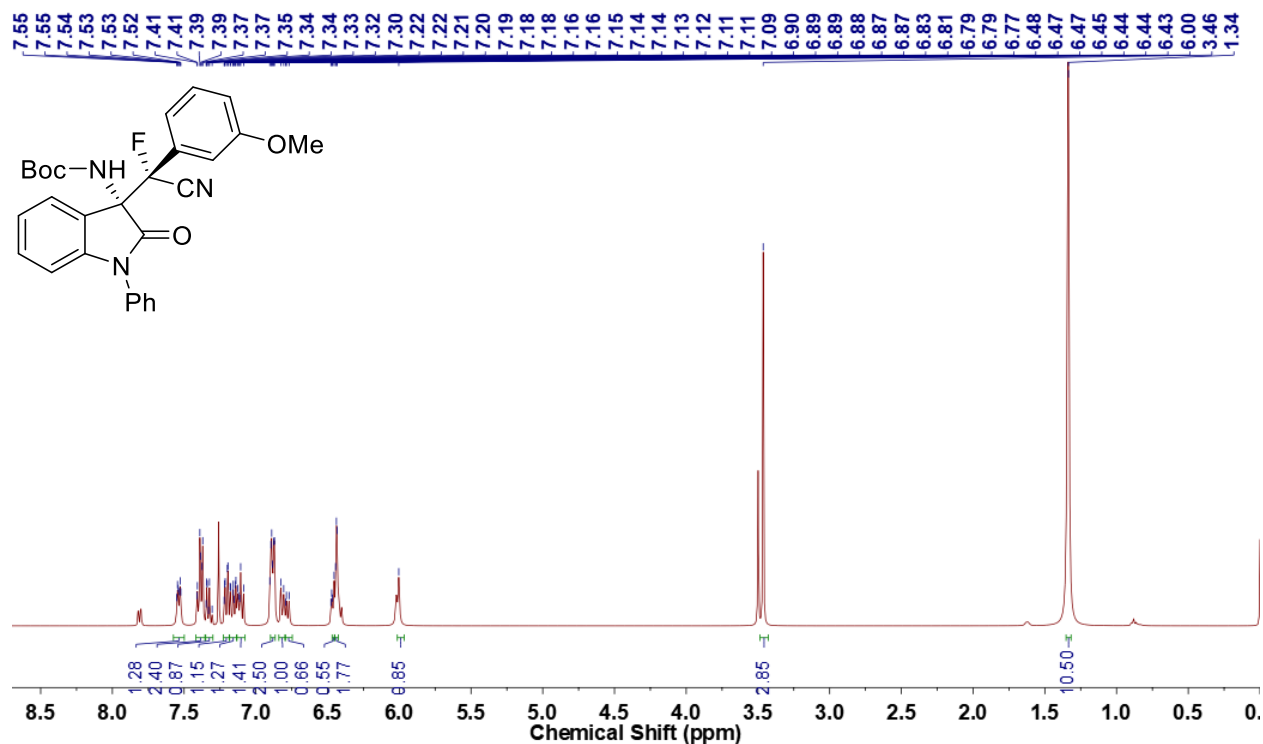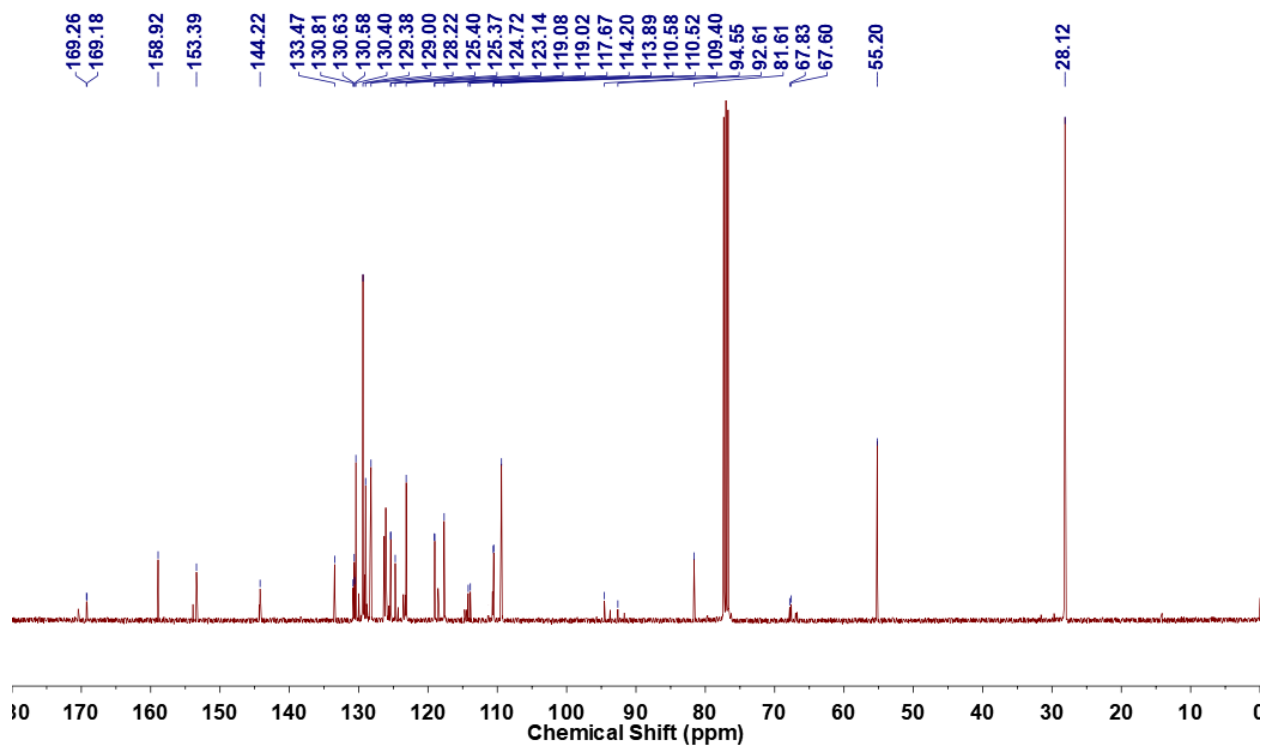

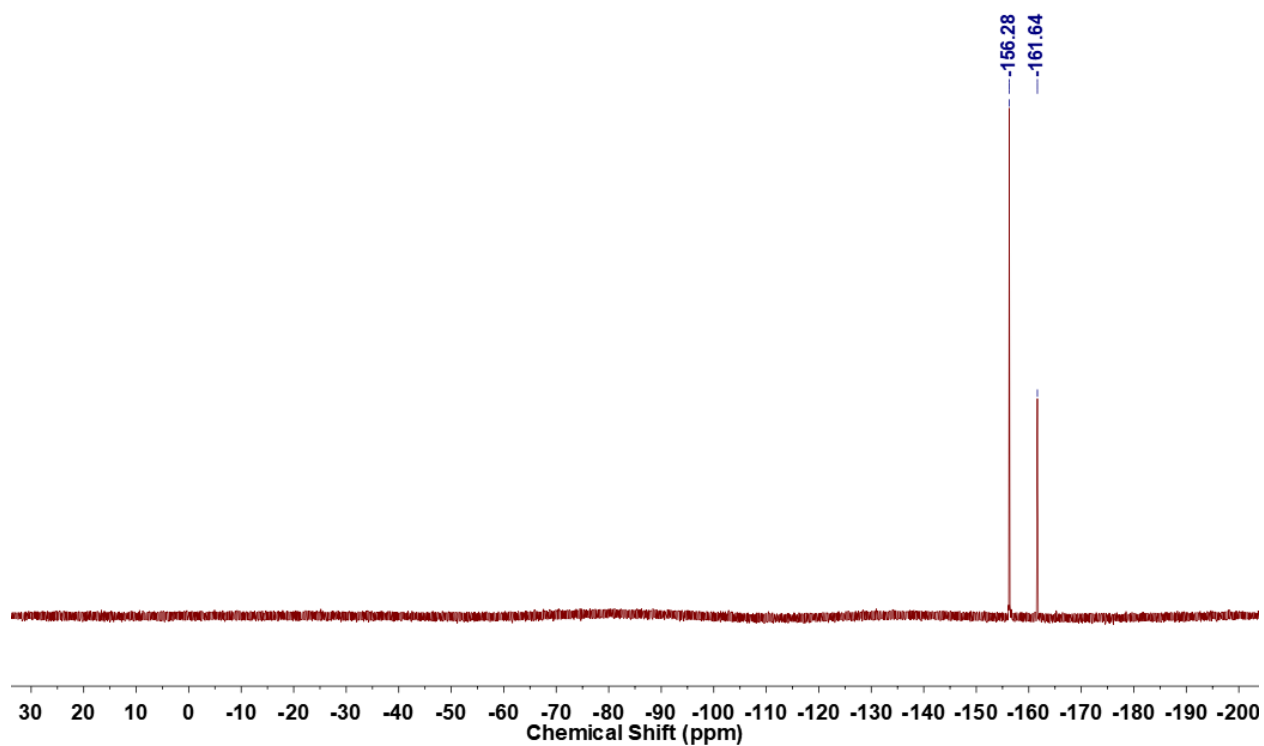

*tert*-Butyl ((*S*)-3-((*S*)-(cyanofluoro(3,5-dimethoxyphenyl)methyl)-2-oxo-1-phenylindolin-3-yl)carbamate (**3ic**)

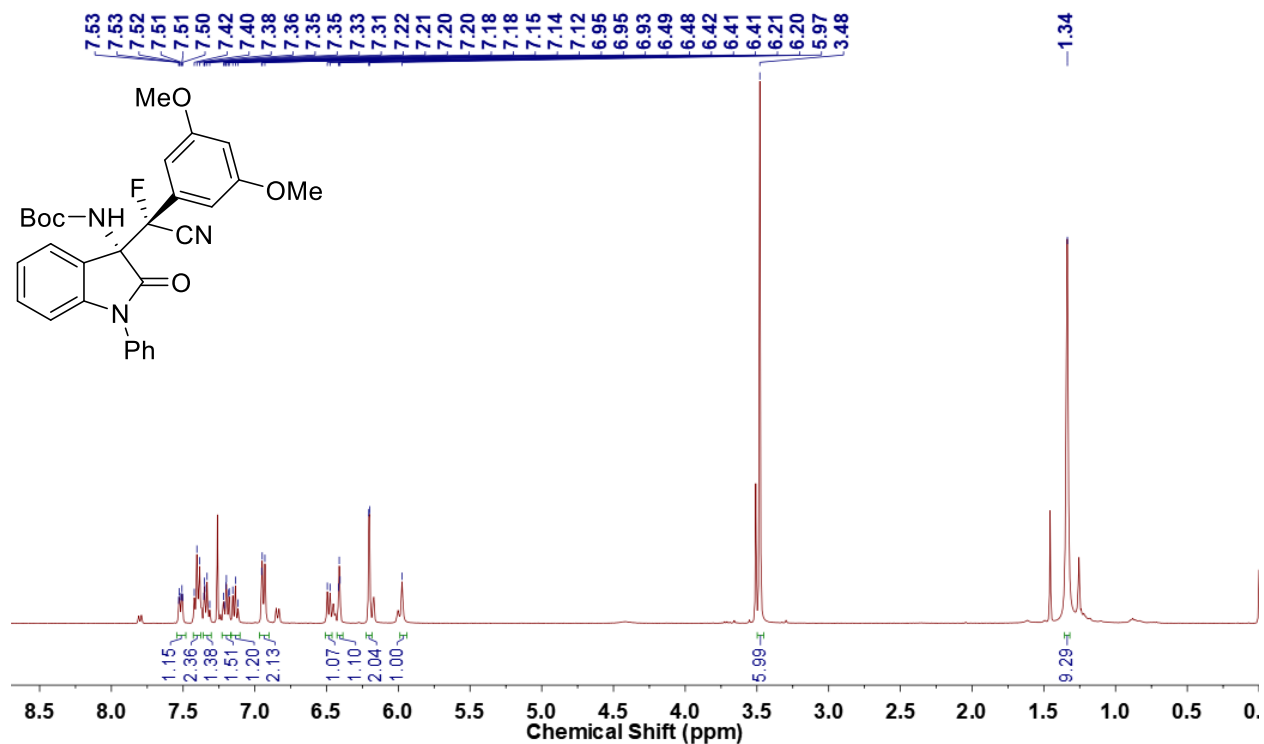

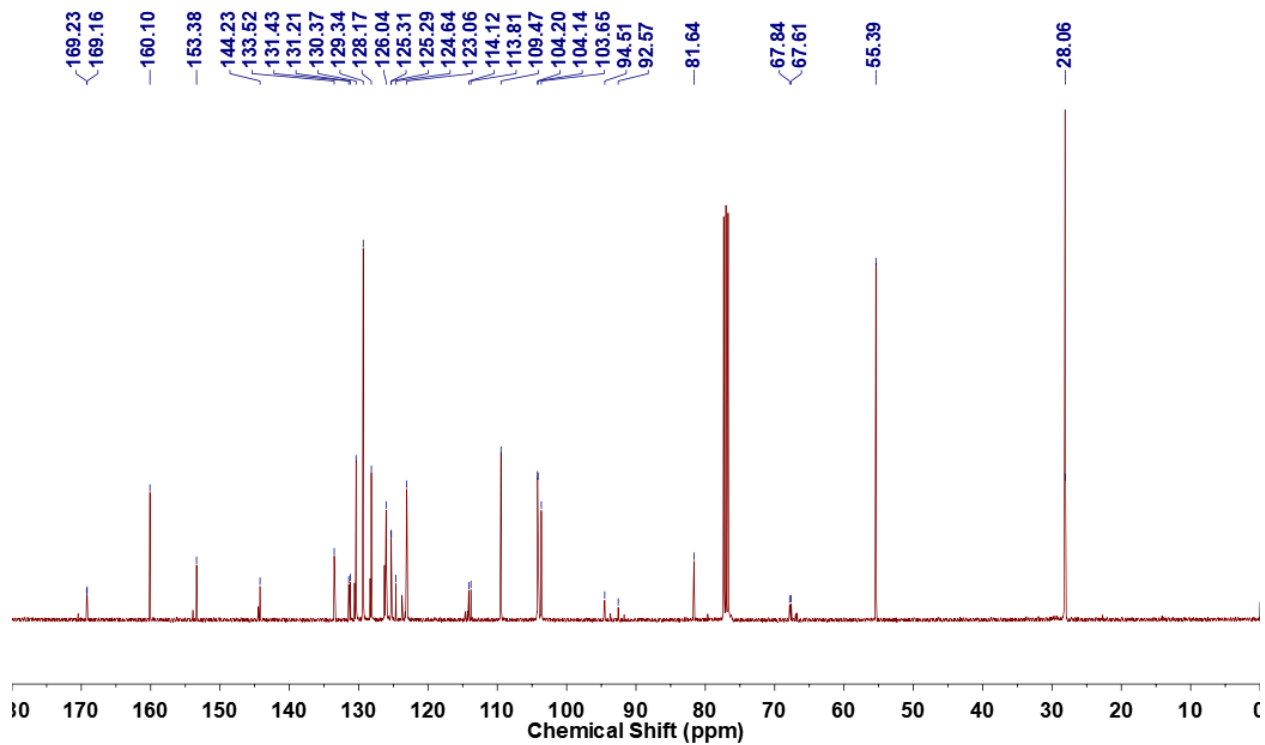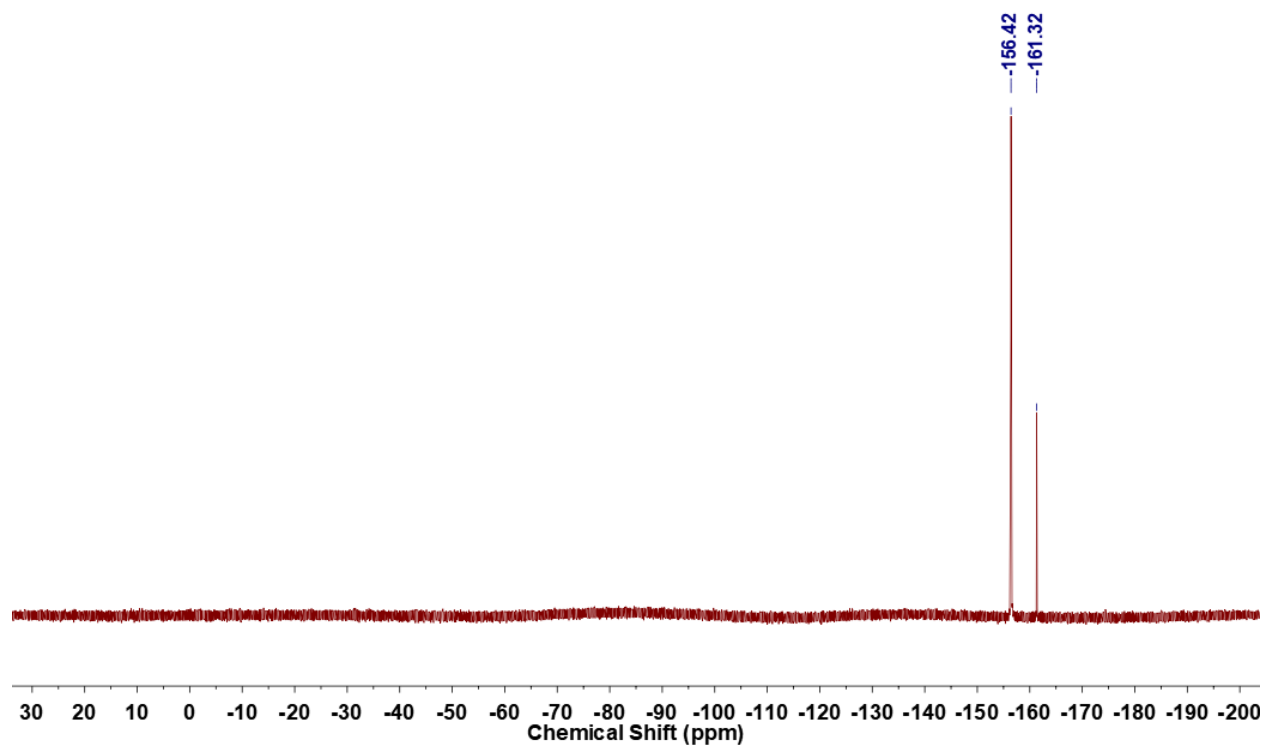

*tert*-Butyl ((*S*)-3-((*S*)-(cyanofluoro(2-naphthyl)methyl)-2-oxo-1-phenylindolin-3-yl)carbamate (3kc)

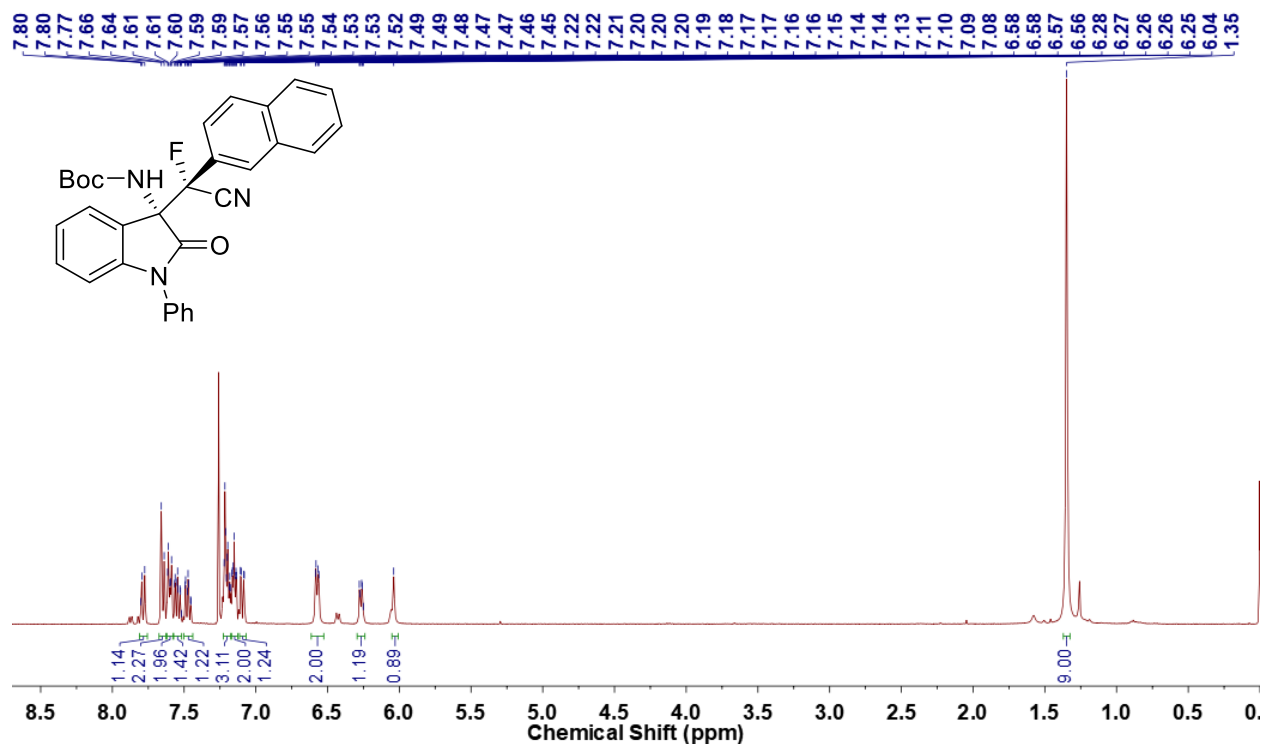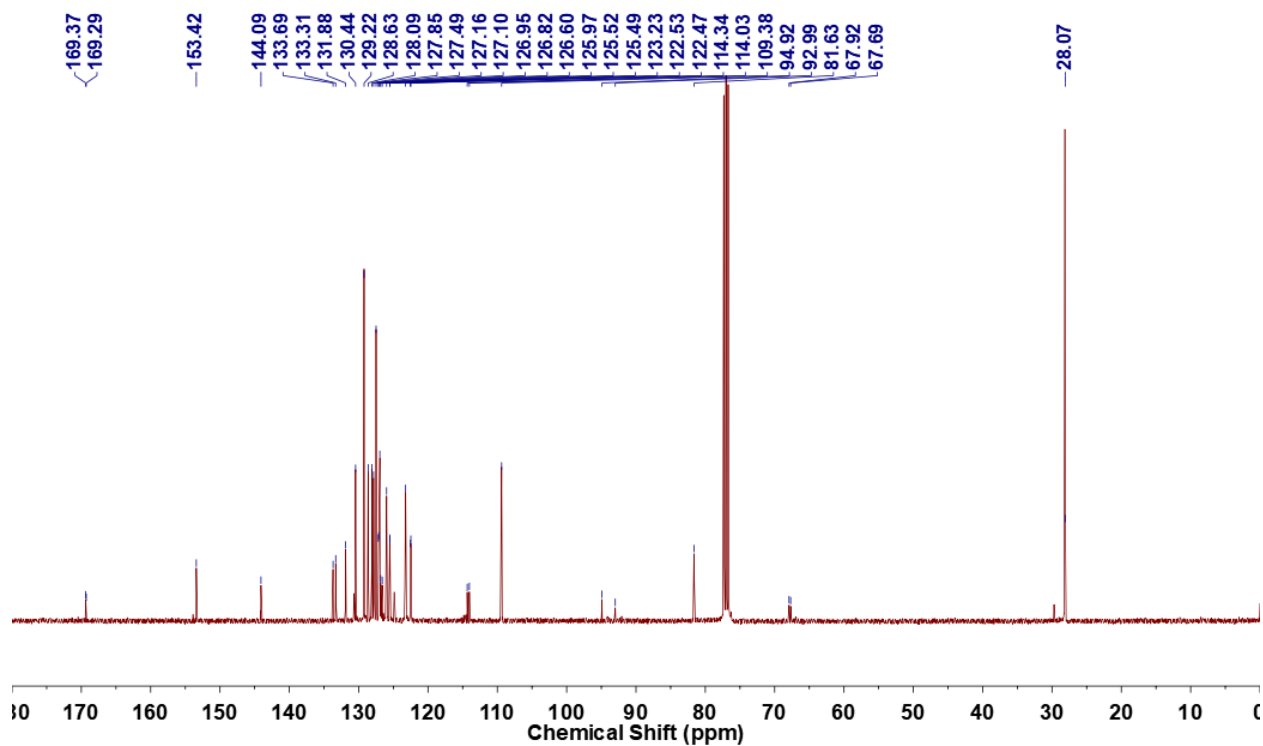

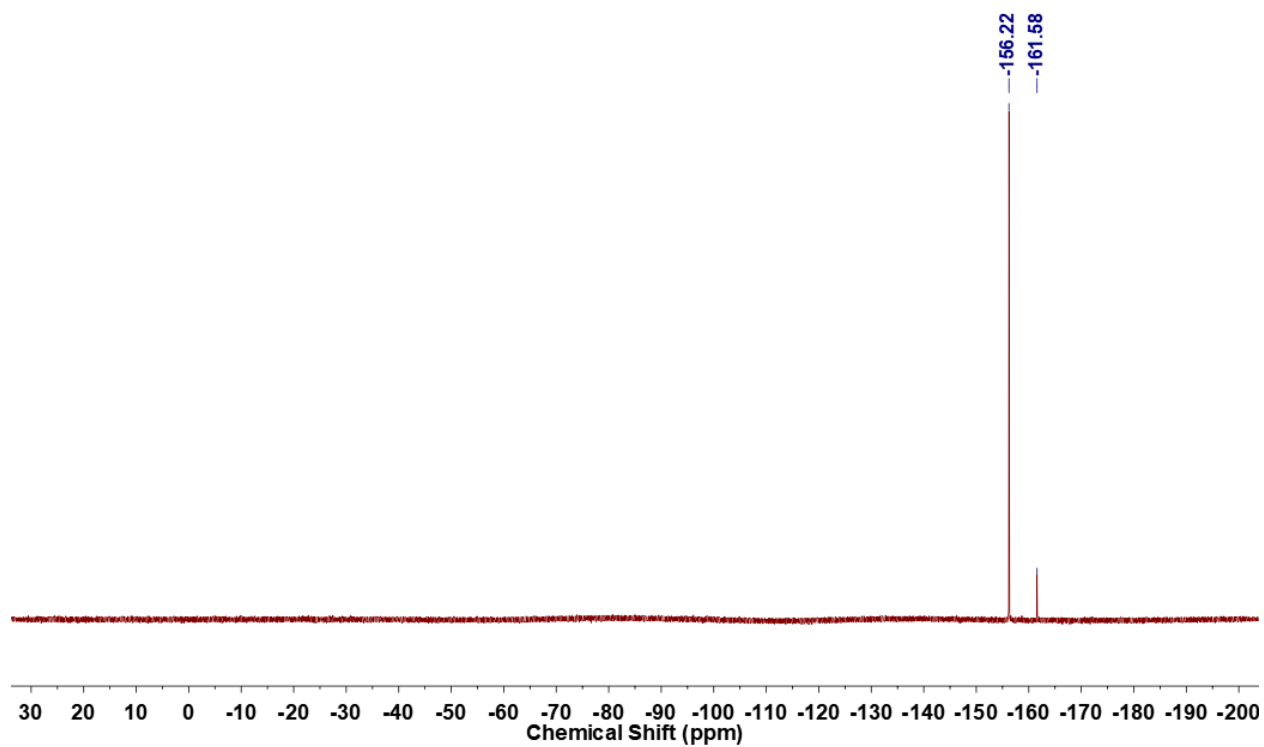

*tert*-Butyl ((*S*)-3-((*R*)-1-cyano-1-phenylethyl)-2-oxo-1-tritylindolin-3-yl)carbamate (**9**)

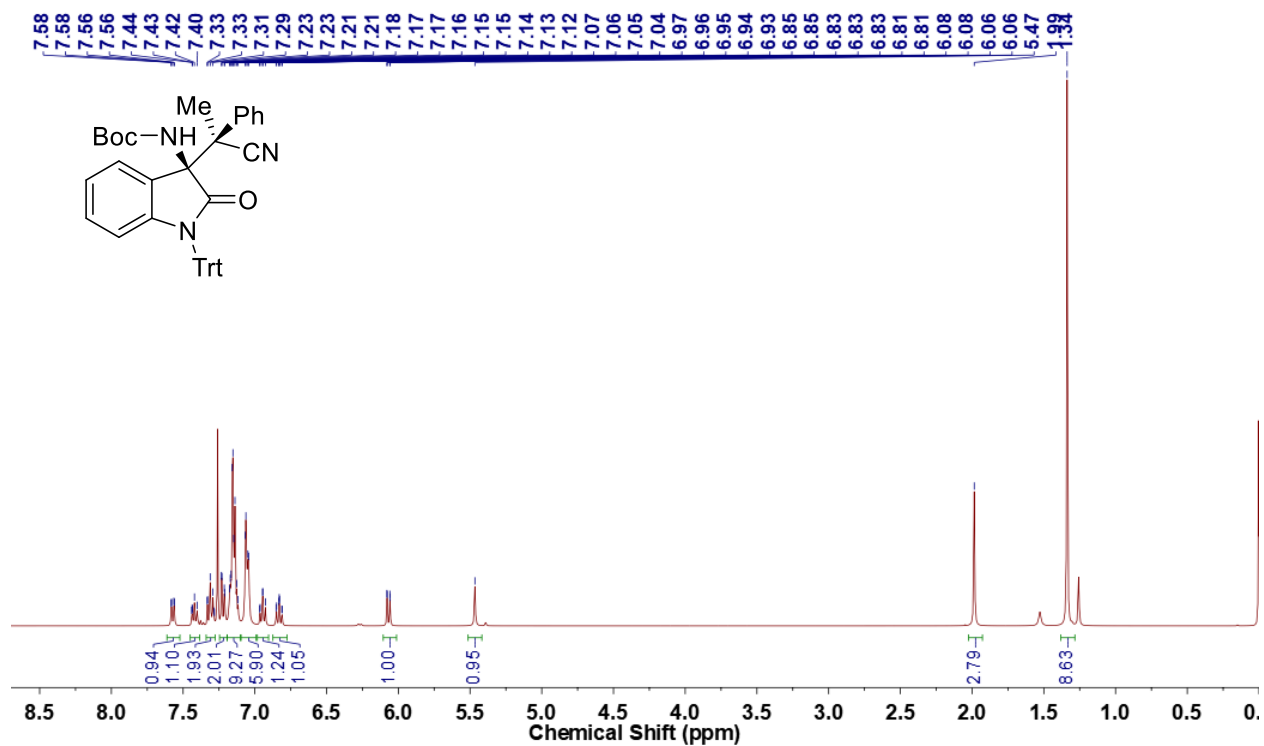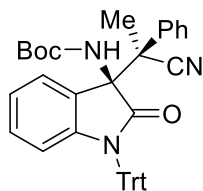

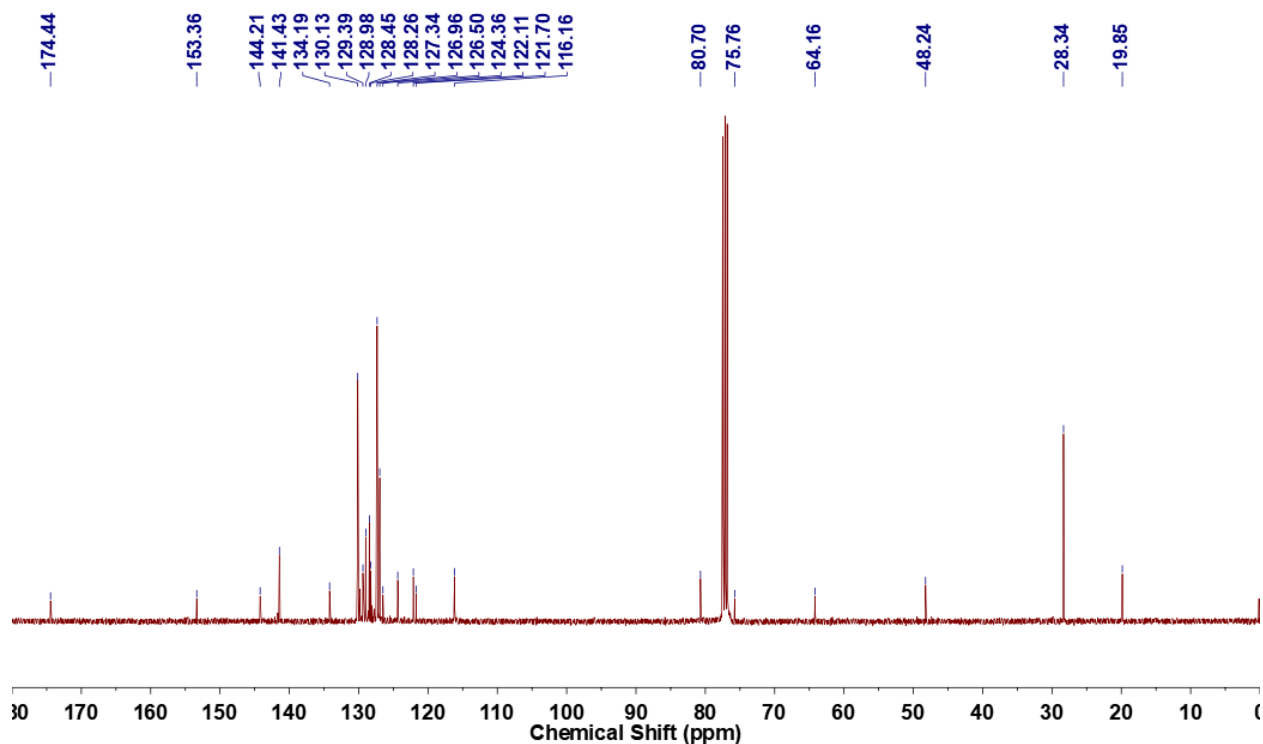

*tert*-Butyl ((*R*)-3-((*R*)-2-((*tert*-butoxycarbonyl)amino)-1-fluoro-1-phenylethyl)-2-oxo-1-tritylindolin-3-yl)carbamate (**4**)

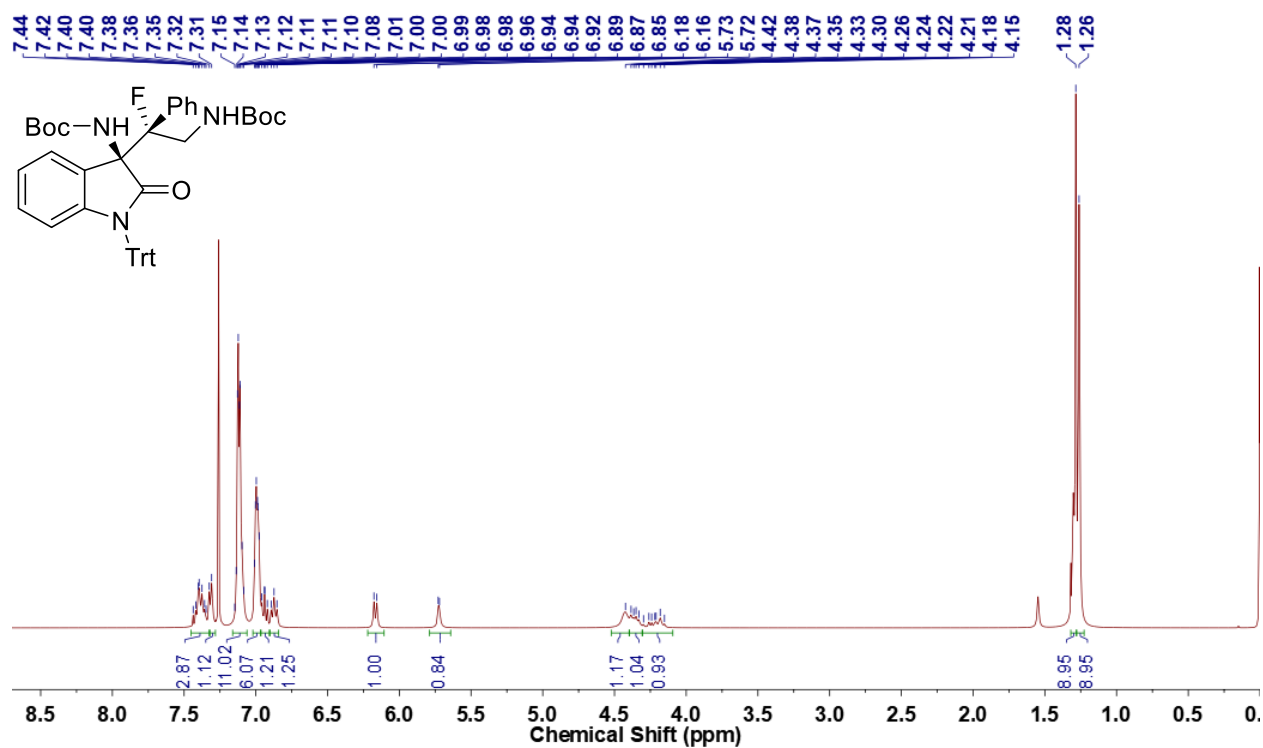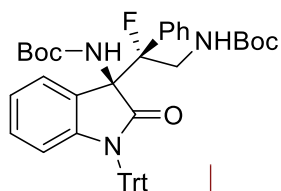



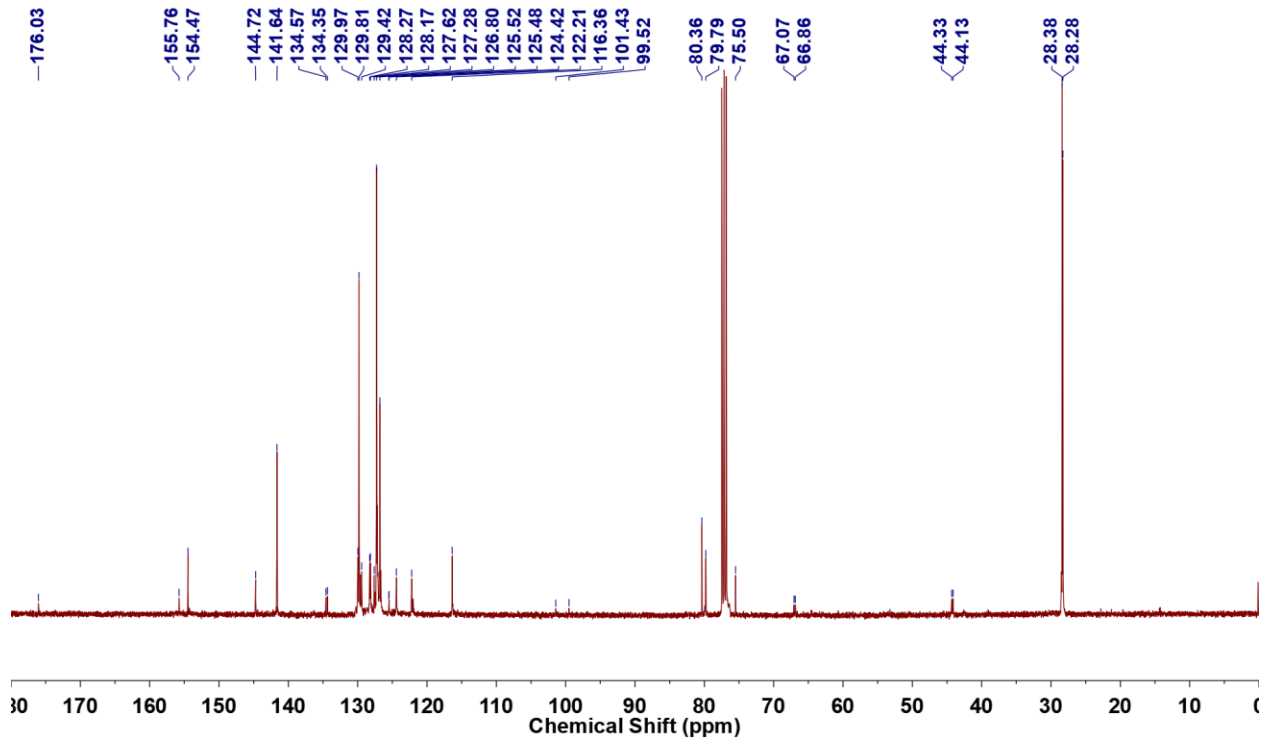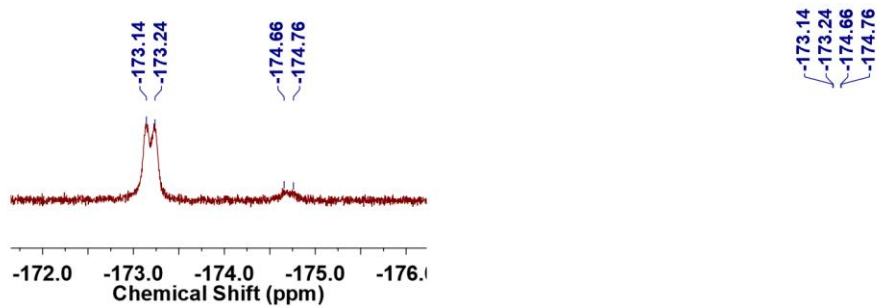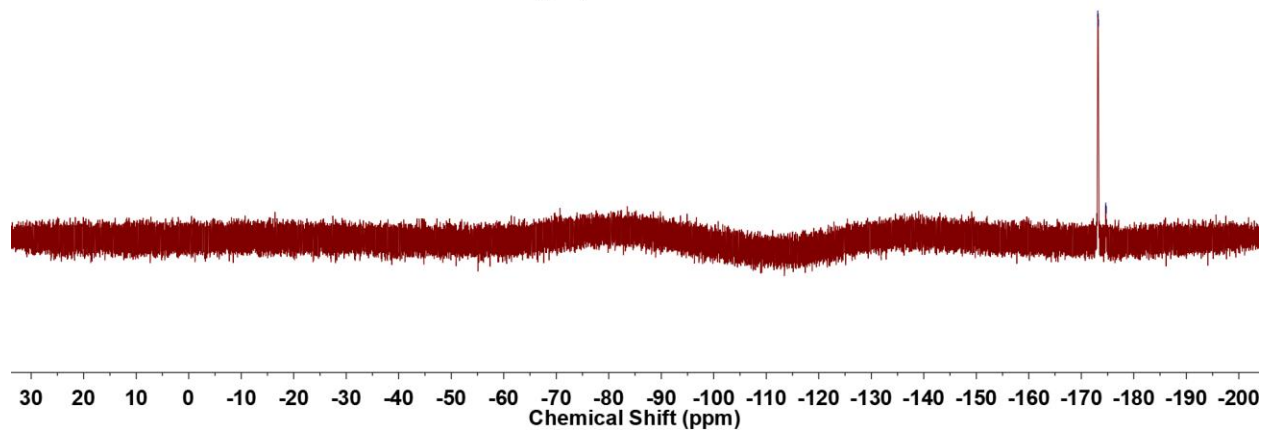

*tert*-Butyl ((*R*)-3-((*S*)-2-amino-1-fluoro-2-oxo-1-phenylethyl)-2-oxo-1-tritylindolin-3-yl)carbamate (**5**)

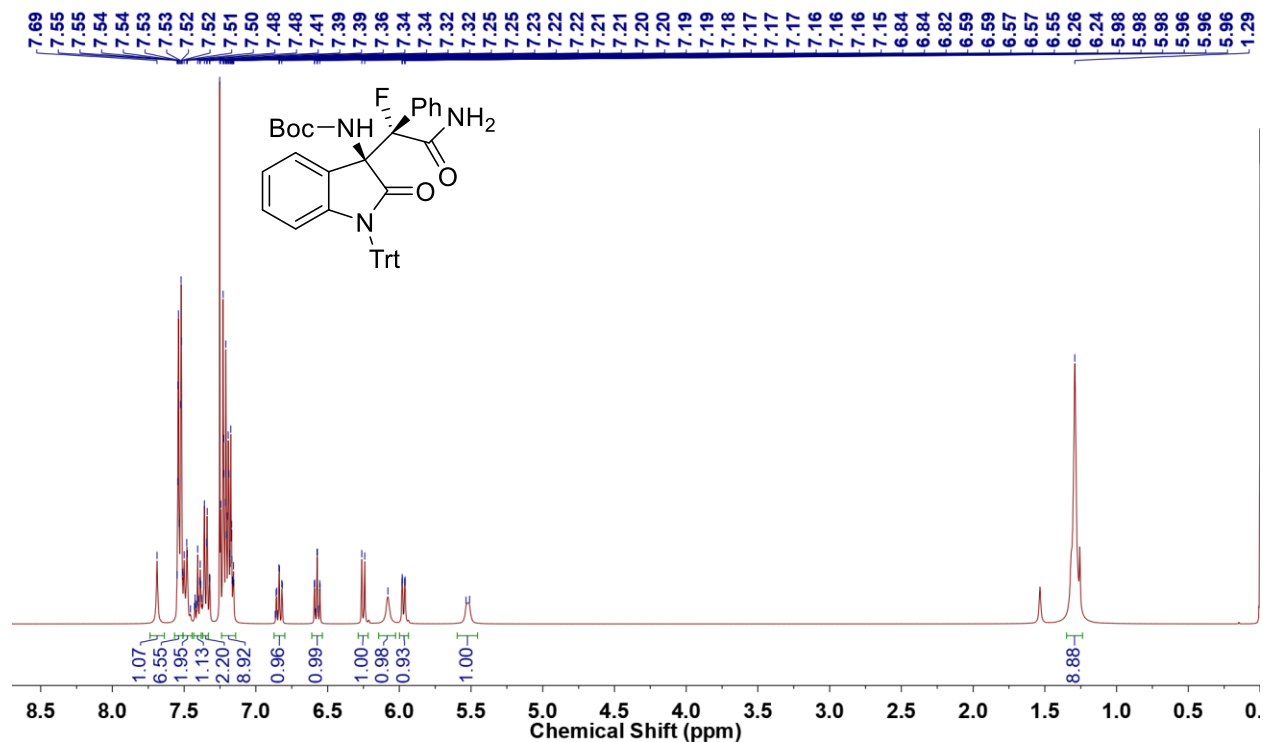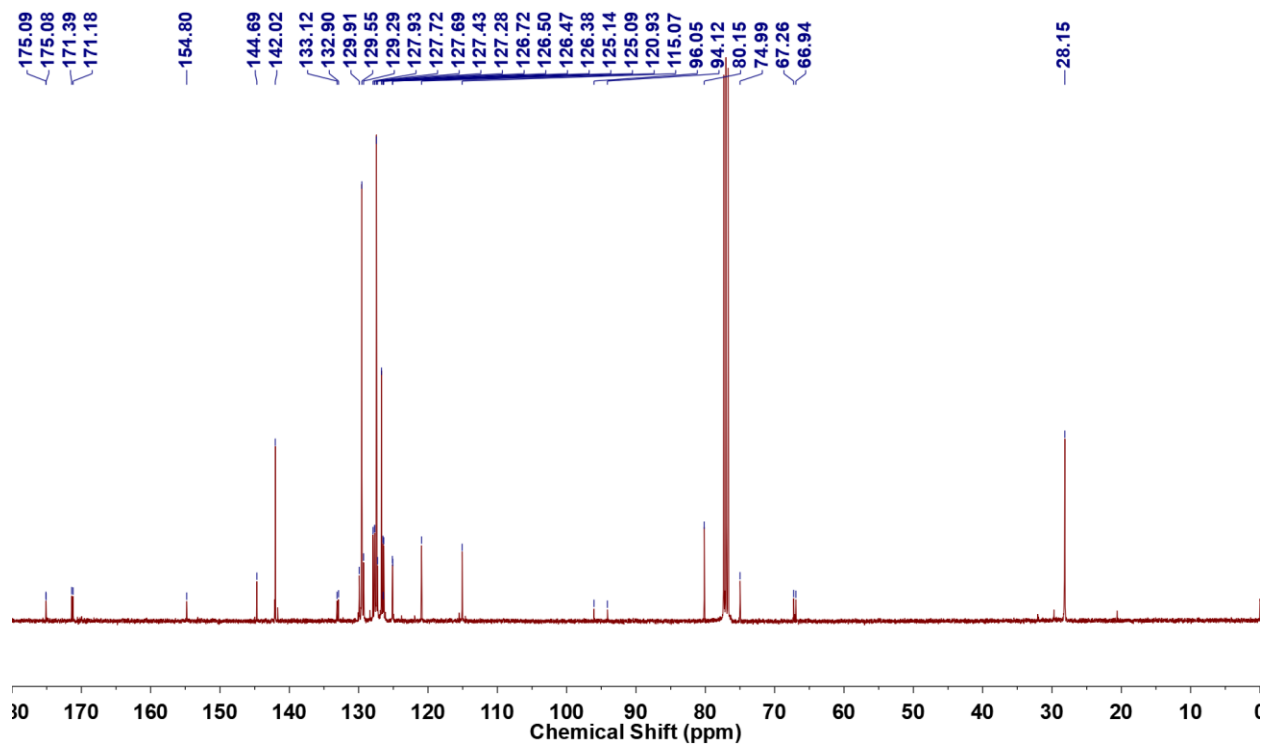

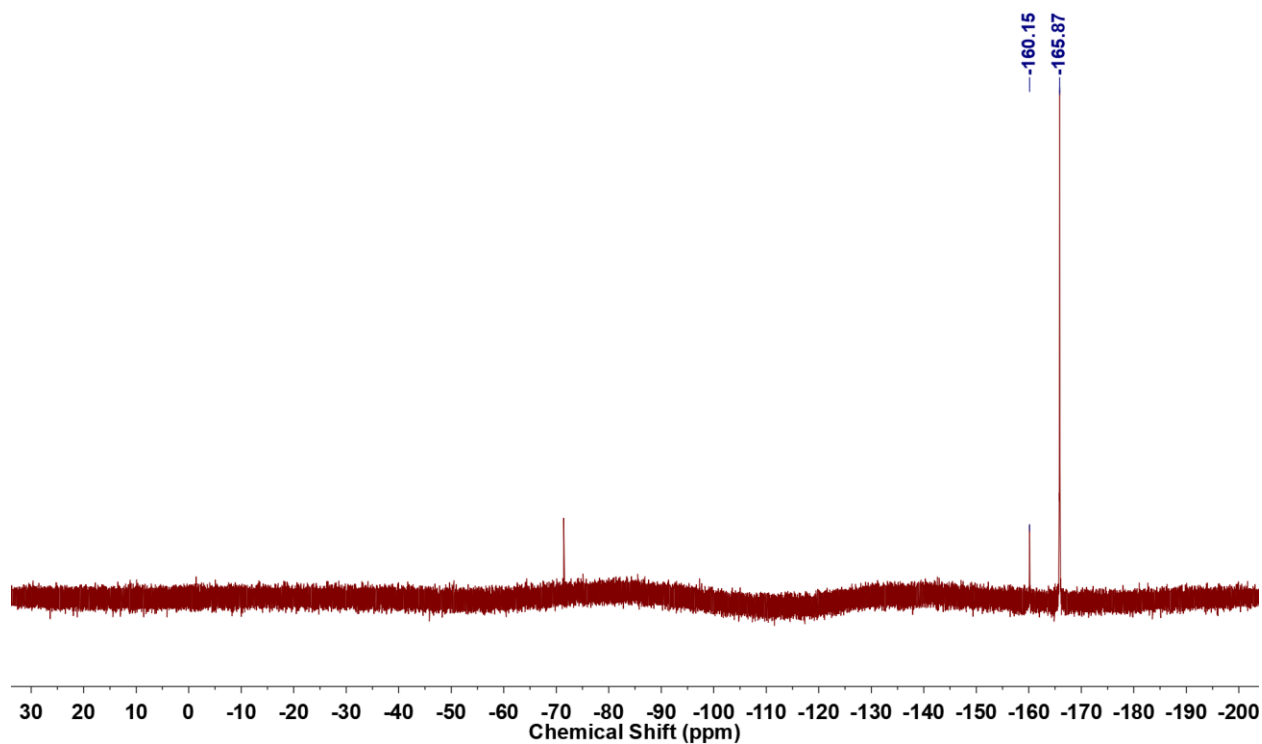

Methyl (2*R*,3*S*)-2-((*tert*-butoxycarbonyl)amino)-3-cyano-3-fluoro-3-phenyl-2-(2-(tritylamino)-phenyl)propanoate (**6**)

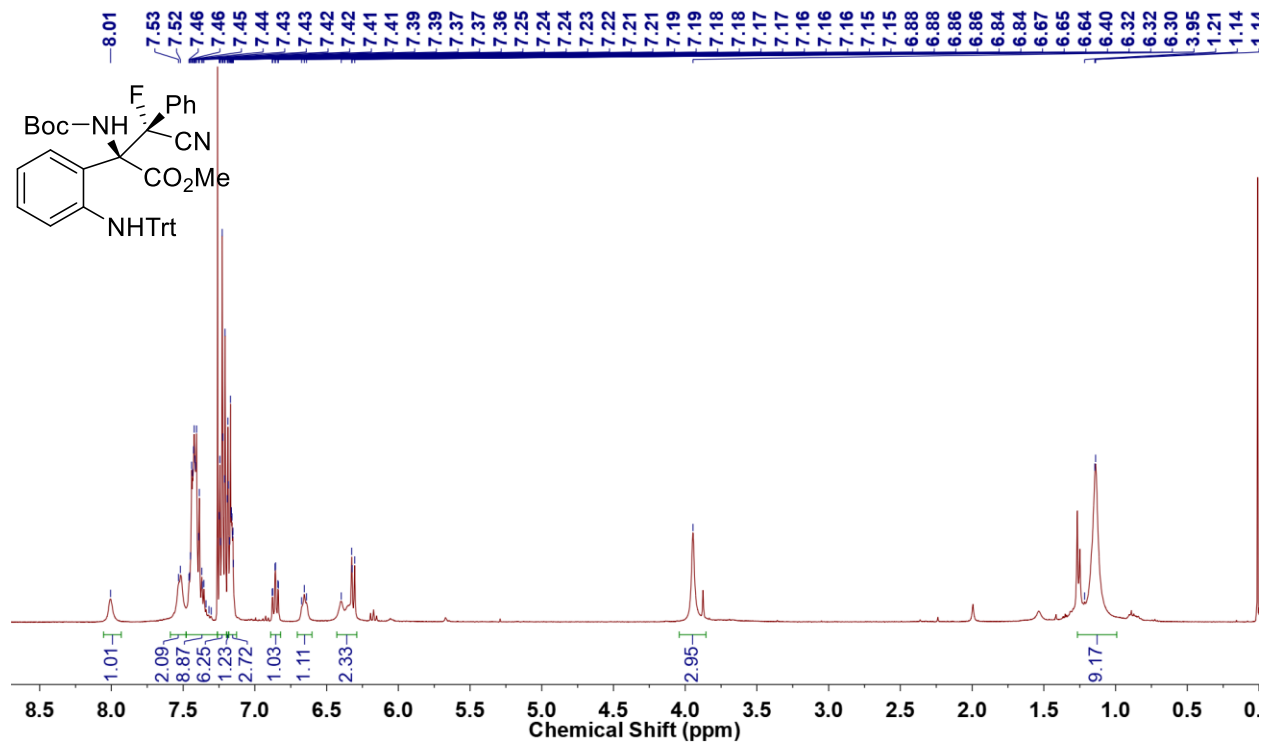

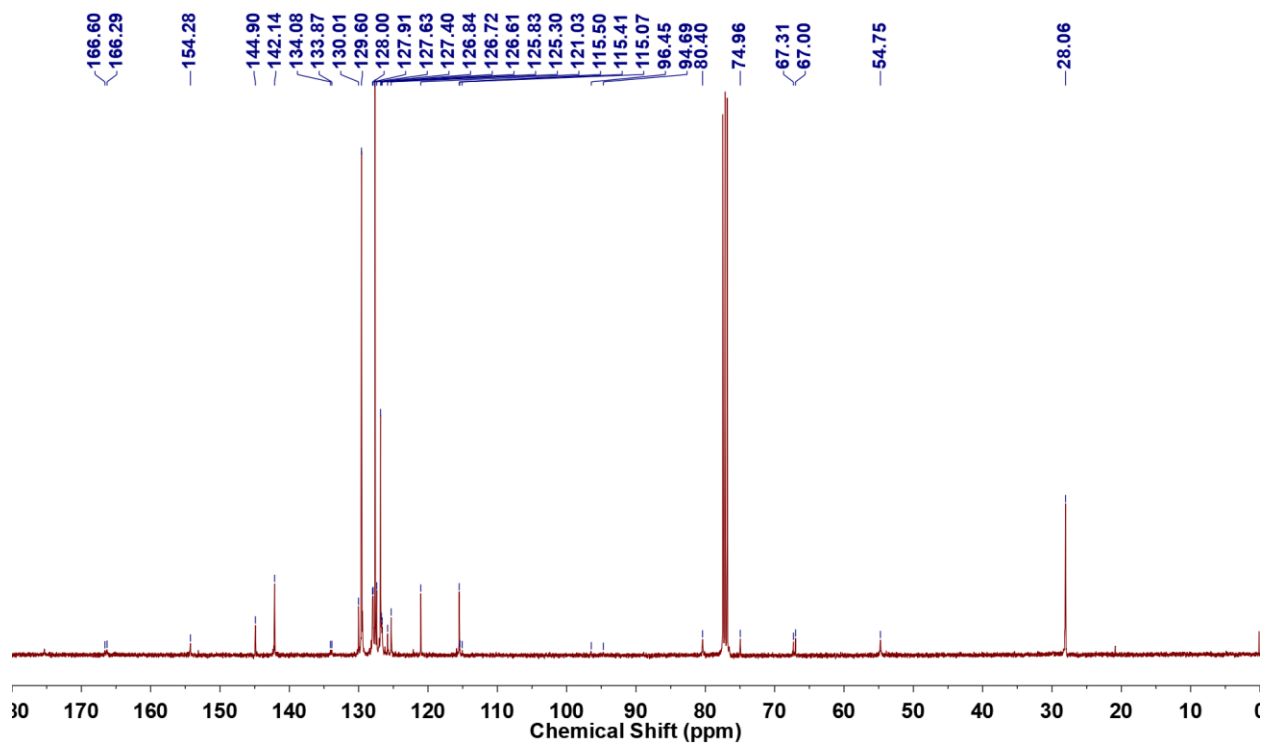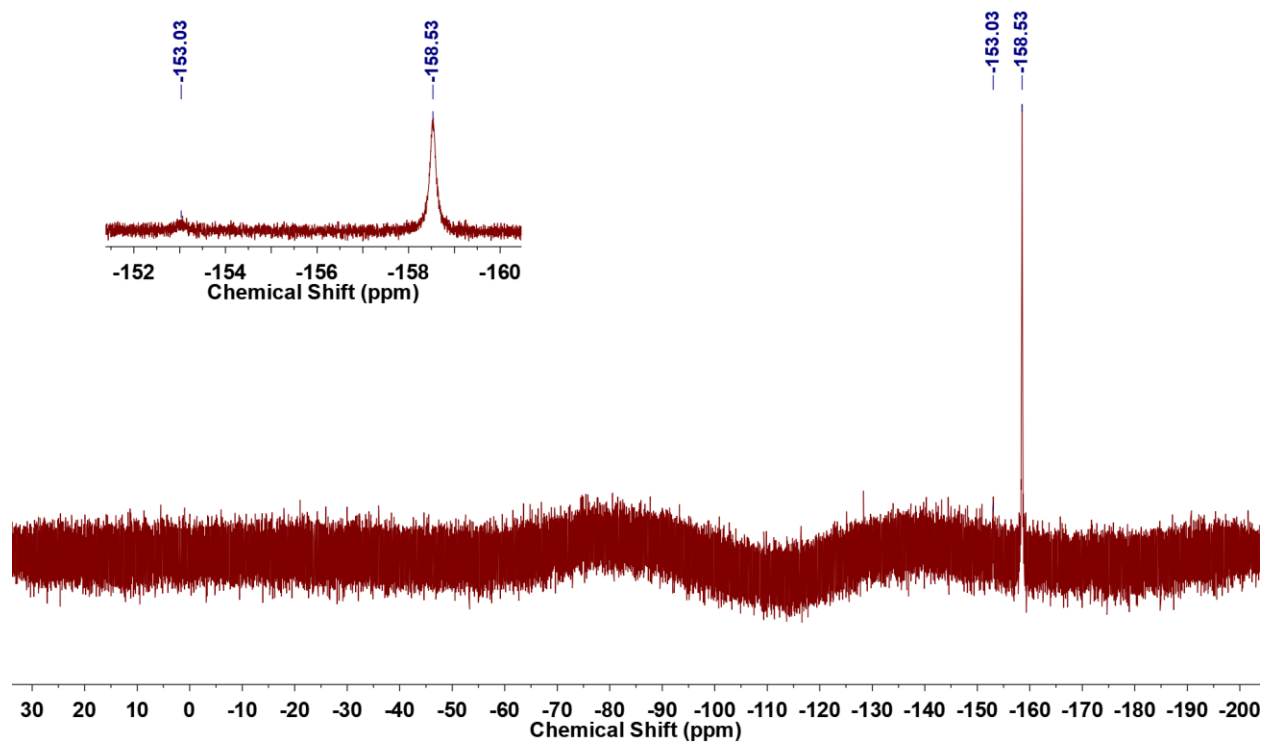

(S)-2-((R)-3-amino-2-oxindolin-3-yl)-2-fluoro-2-phenylacetonitrile (7)

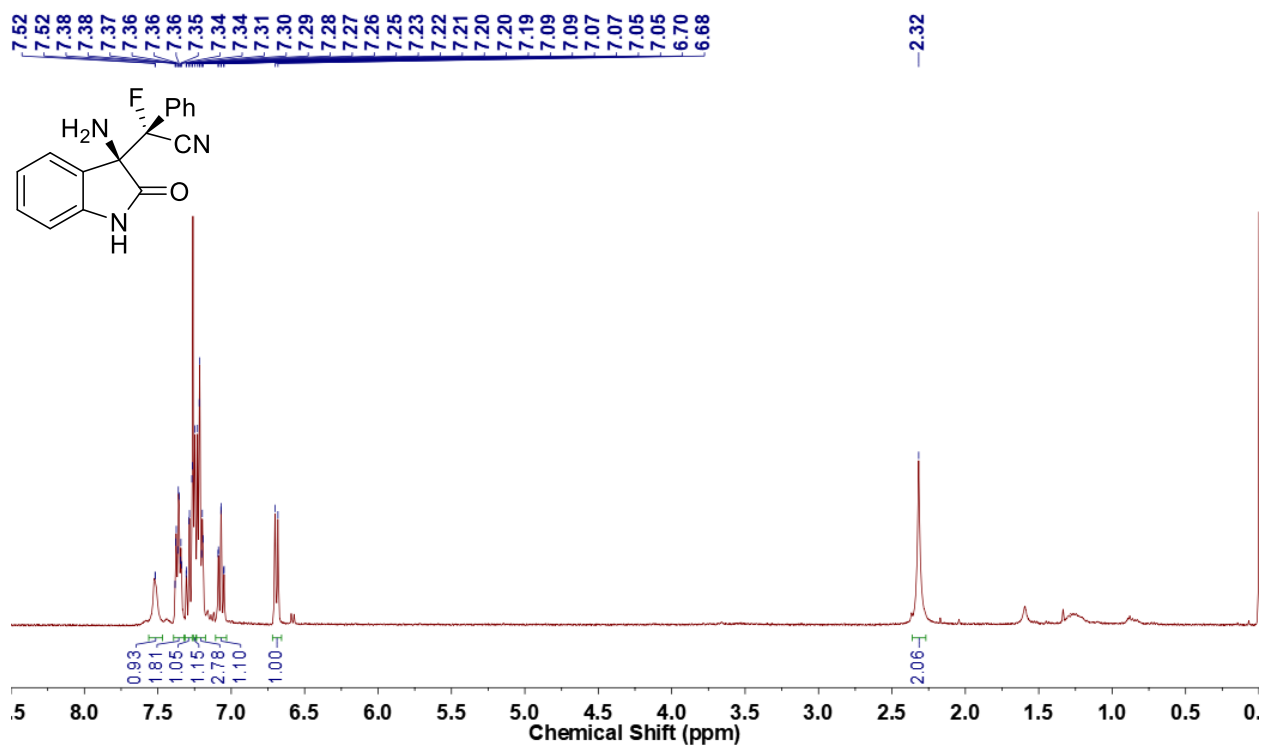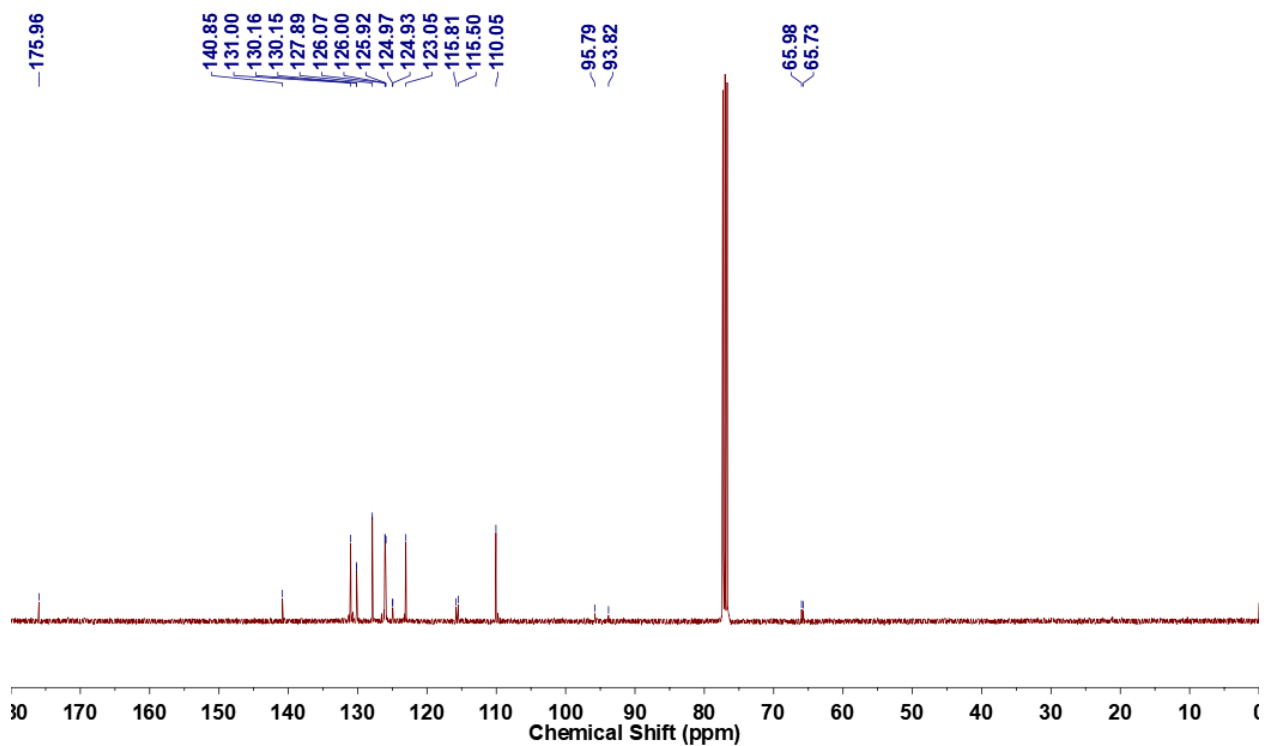

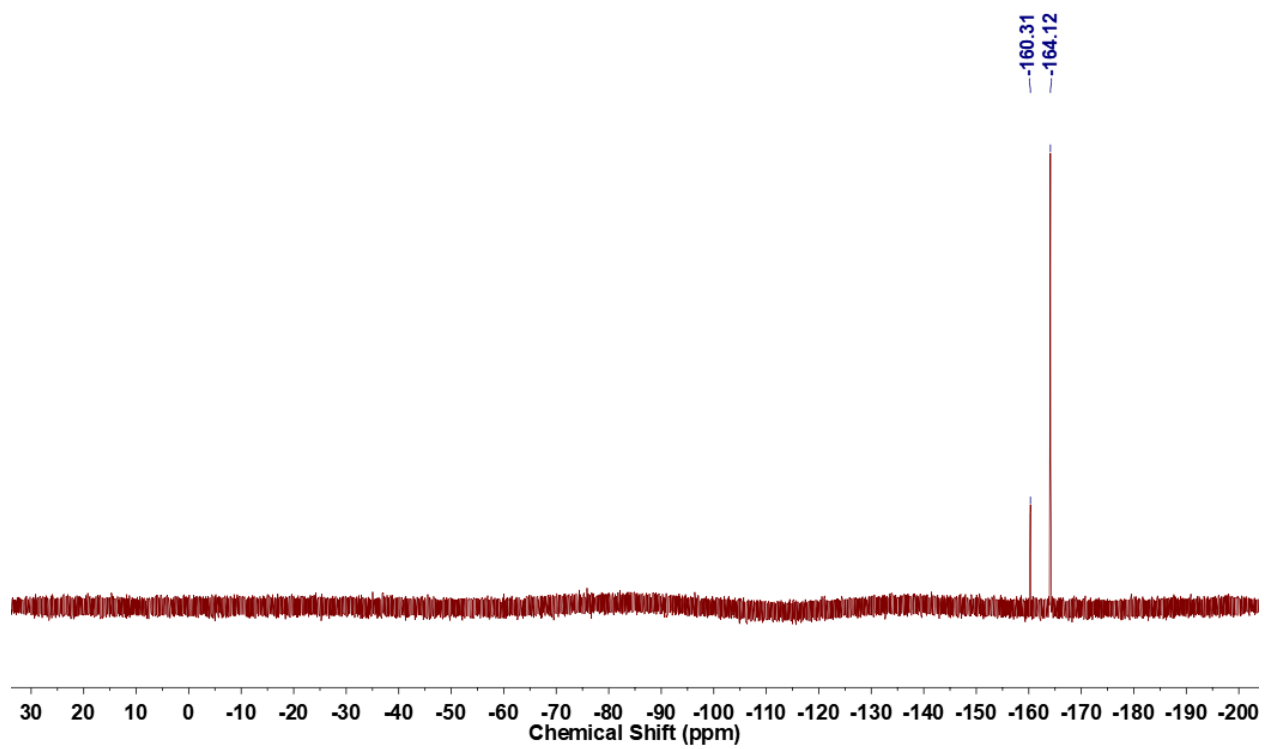

## 6. HPLC Chromatograms

*tert*-Butyl ((*R*)-3-((*S*)-cyanofluoro(phenyl)methyl)-2-oxo-1-tritylindolin-3-yl)carbamate (**3ab**)

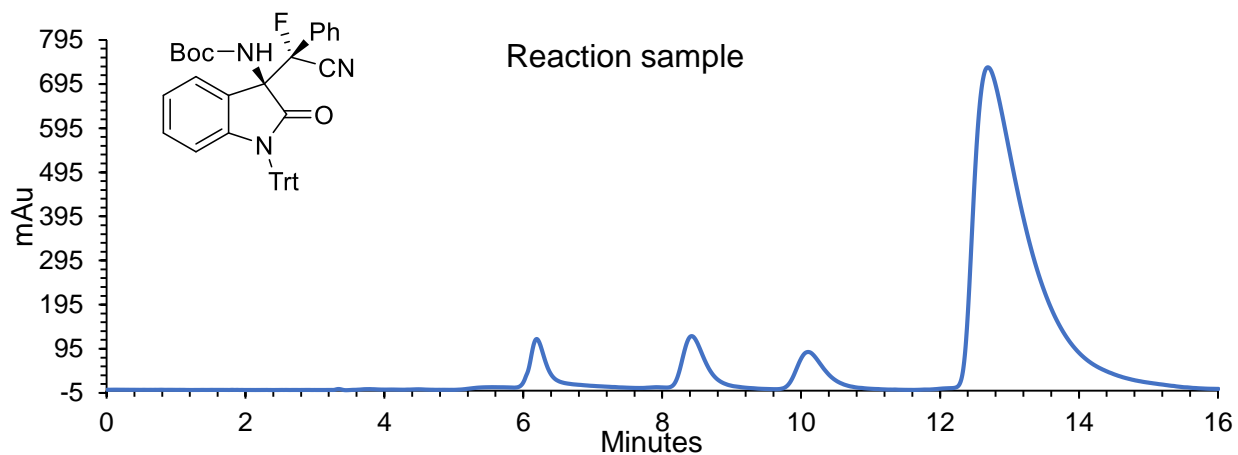

Signal 4: DAD1 D, Sig=232,4 Ref=550,100

| Ret. Time [min] | Area %  |
|-----------------|---------|
| 10.101          | 5.1346  |
| 12.688          | 94.8654 |

dr = 12.7:1, major ee = 90%

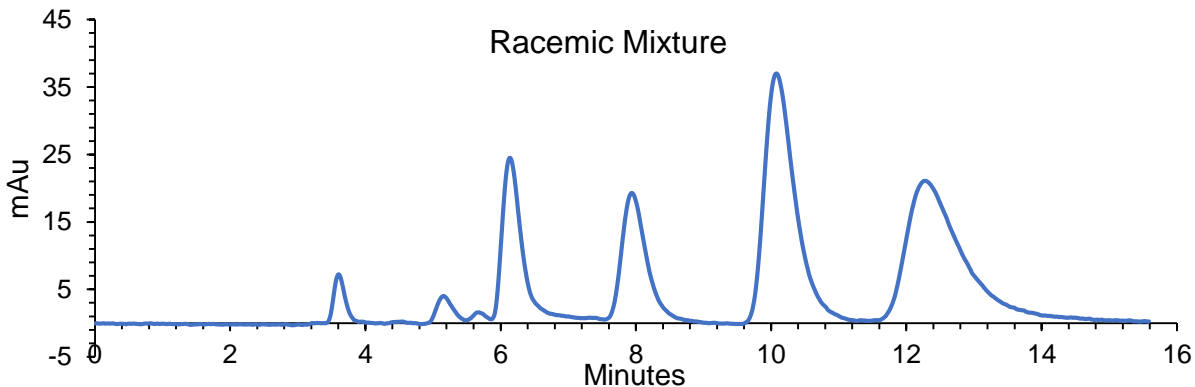

Signal 4: DAD1 D, Sig=232,4 Ref=550,100

| Ret. Time [min] | Area %  |
|-----------------|---------|
| 6.182           | 14.5638 |
| 7.989           | 14.8100 |
| 10.102          | 36.4560 |
| 12.280          | 34.1703 |

*tert*-Butyl ((*R*)-3-((*S*)-cyanofluoro(3-chlorophenyl)methyl)-2-oxo-1-tritylindolin-3-yl)carbamate  
(3bb)

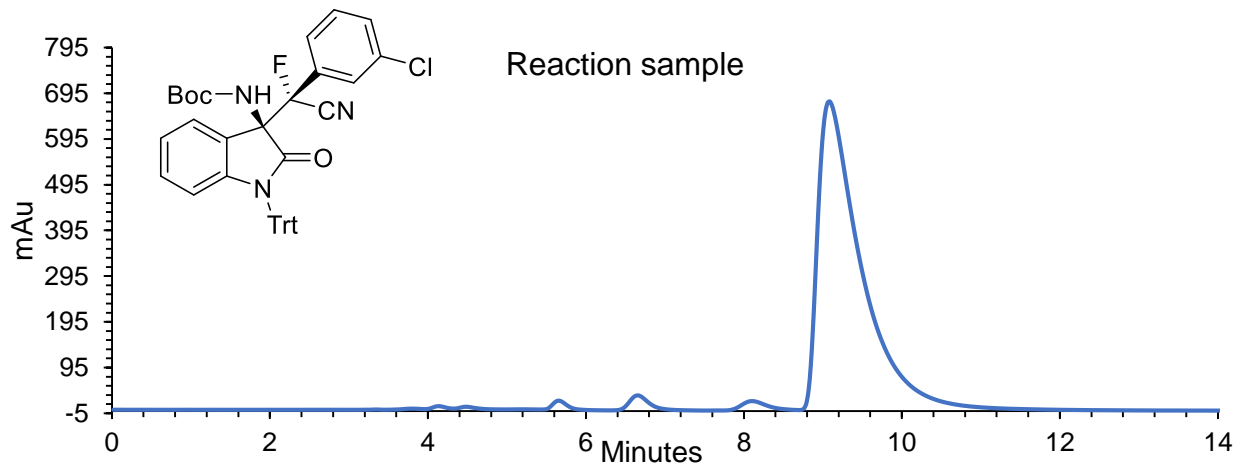

Signal 4: DAD1 D, Sig=254,2 Ref=550,100

| Ret. Time [min] | Area %  |
|-----------------|---------|
| 8.155           | 1.7213  |
| 9.115           | 98.2787 |

dr = 36.0:1, major ee = 97%

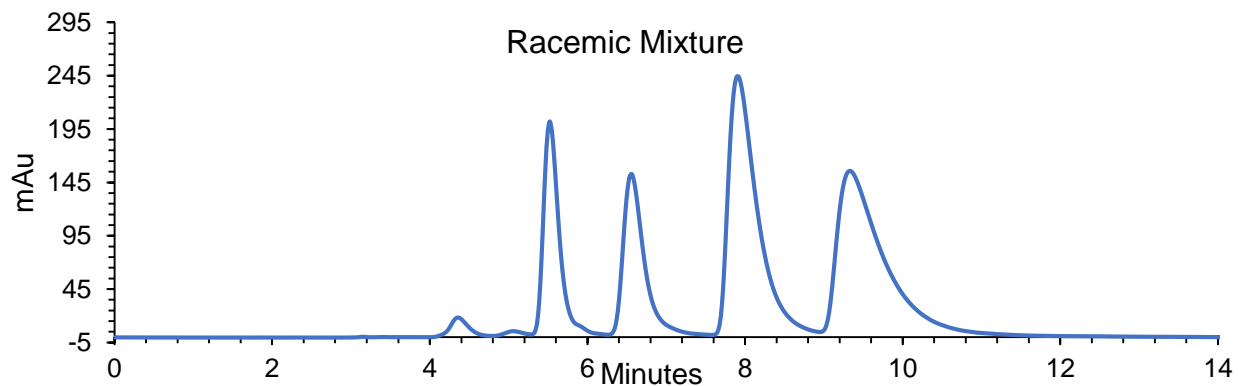

Signal 4: DAD1 D, Sig=254,2 Ref=550,100

| Ret. Time [min] | Area %  |
|-----------------|---------|
| 5.522           | 16.1457 |
| 6.556           | 16.2053 |
| 7.907           | 33.7320 |
| 9.331           | 33.9171 |



*tert*-Butyl ((*R*)-3-((*S*)-cyano fluoro(3-bromophenyl)methyl)-2-oxo-1-tritylindolin-3-yl)carbamate  
(3**cb**)

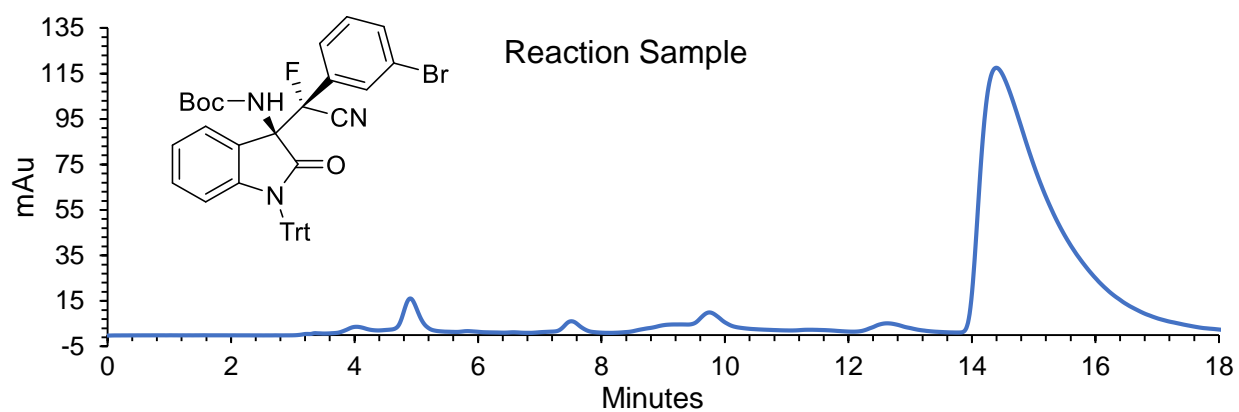

Signal 4: DAD1 D, Sig=254,2 Ref=550,100

| Ret. Time [min] | Area %  |
|-----------------|---------|
| 12.641          | 1.6586  |
| 14.393          | 98.3414 |

dr = 39.5:1, major ee = 97%

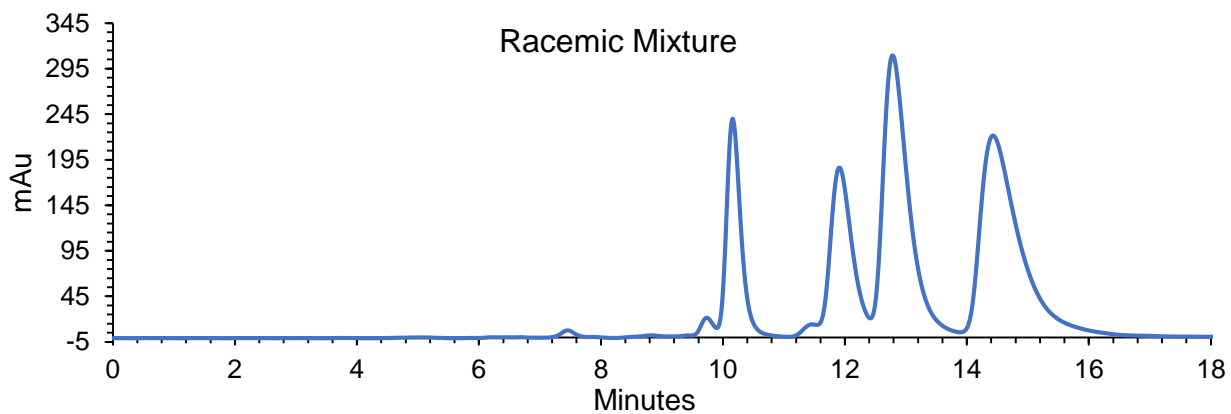

Signal 4: DAD1 D, Sig=254,2 Ref=550,100

| Ret. Time [min] | Area %  |
|-----------------|---------|
| 5.522           | 16.1457 |
| 6.556           | 16.2053 |
| 7.907           | 33.7320 |
| 9.331           | 33.9171 |

*tert*-Butyl ((*R*)-3-((*S*)-cyanofluoro(2-fluorophenyl)methyl)-2-oxo-1-tritylindolin-3-yl)carbamate  
(3db)

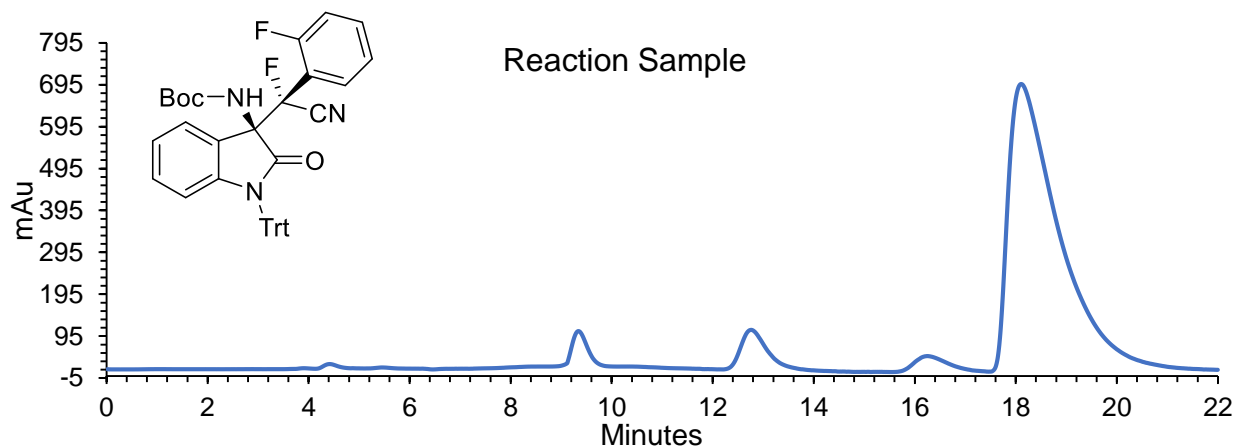

Signal 4: DAD1 D, Sig=254,2 Ref=550,100

| Ret. Time [min] | Area %  |
|-----------------|---------|
| 16.265          | 3.5224  |
| 18.228          | 96.4776 |

dr = 9.4:1, major ee = 93%

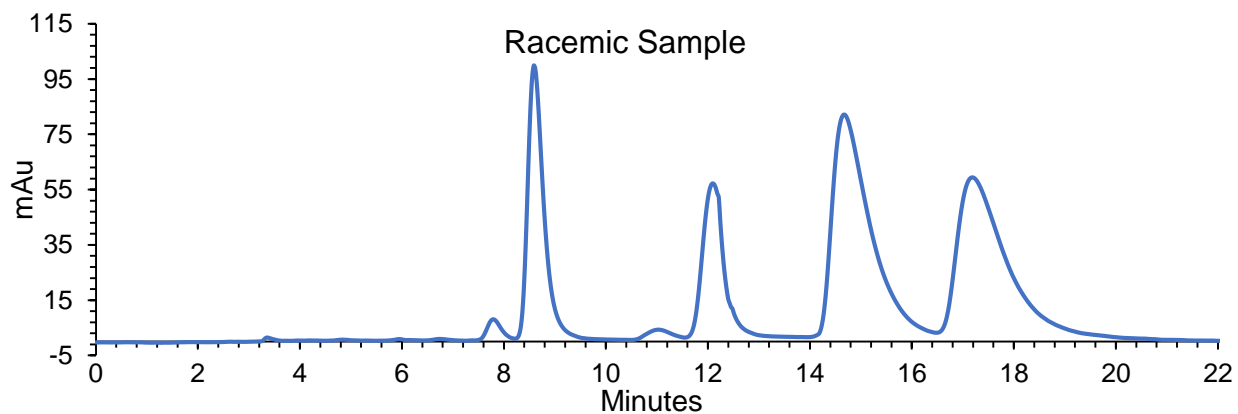

Signal 4: DAD1 D, Sig=254,2 Ref=550,100

| Ret. Time [min] | Area %  |
|-----------------|---------|
| 8.596           | 18.1803 |
| 12.098          | 16.8515 |
| 14.674          | 32.6184 |
| 17.187          | 32.3498 |

*tert*-Butyl ((*R*)-3-((*S*)-cyanofluoro(3-methoxyphenyl)methyl)-2-oxo-1-tritylindolin-3-yl)carbamate (**3b**)

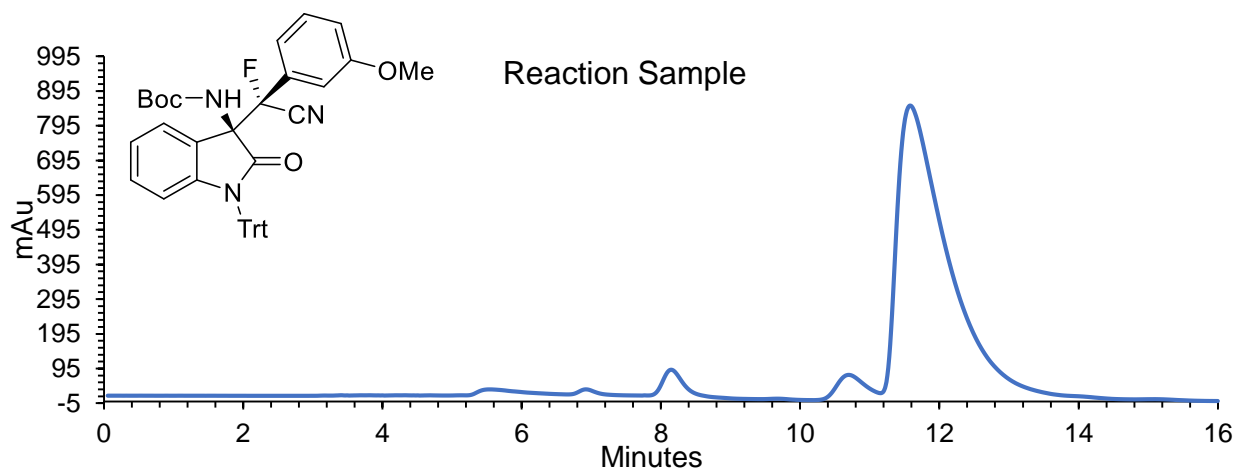

Signal 4: DAD1 D, Sig=254,2 Ref=550,100

| Ret. Time [min] | Area %  |
|-----------------|---------|
| 10.701          | 4.5910  |
| 11.673          | 95.4090 |

dr = 24.0:1, major ee = 91%

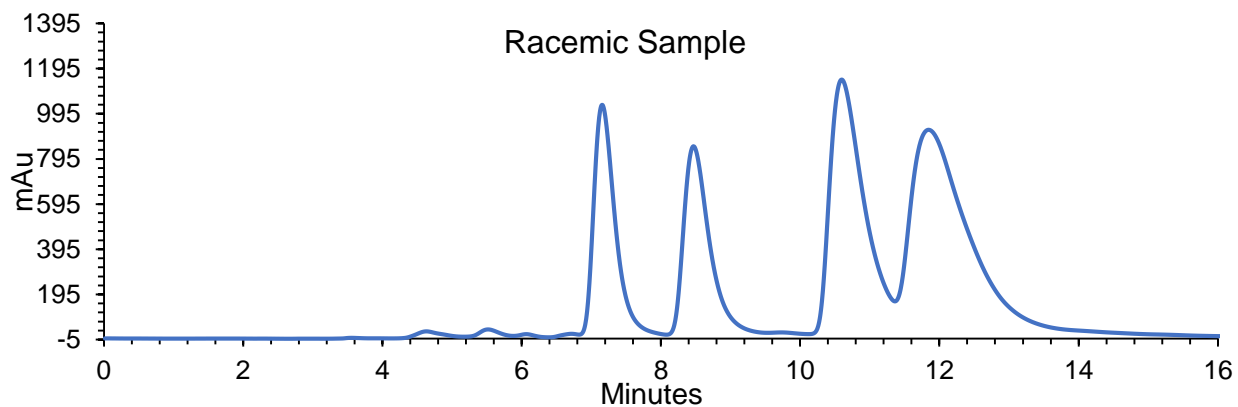

Signal 4: DAD1 D, Sig=254,2 Ref=550,100

| Ret. Time [min] | Area %  |
|-----------------|---------|
| 7.156           | 16.3114 |
| 8.468           | 16.3783 |
| 10.597          | 31.4988 |
| 11.951          | 35.8115 |

Methyl 4-((*S*)-((*R*)-3-((*tert*-butoxycarbonyl)amino)-2-oxo-1-tritylindolin-3-yl)  
(cyano)fluoromethyl)benzoate (**3fb**)

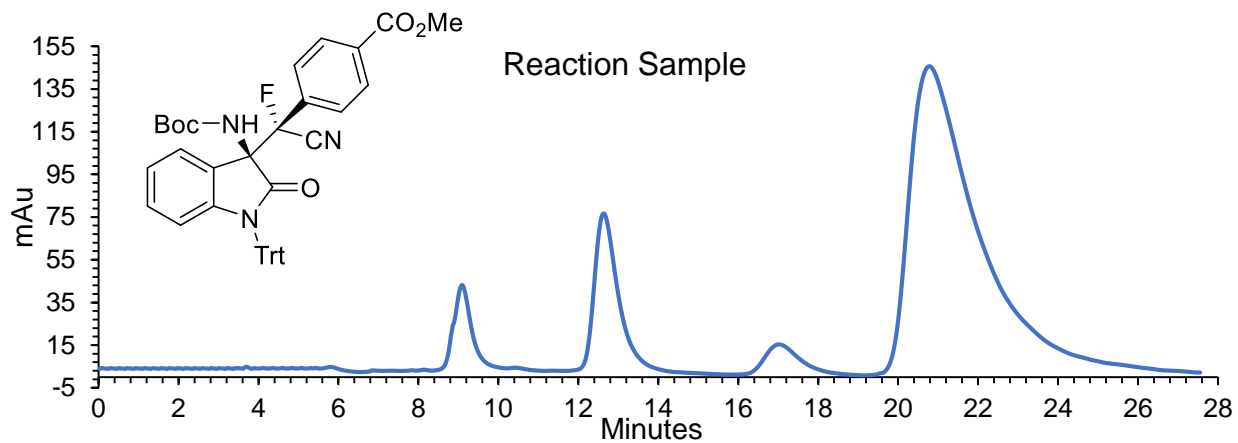

Signal 4: DAD1 D, Sig=254,2 Ref=550,100

| Ret. Time [min] | Area %  |
|-----------------|---------|
| 17.057          | 4.5427  |
| 20.815          | 95.4573 |

dr = 9.1:1, major ee = 91%

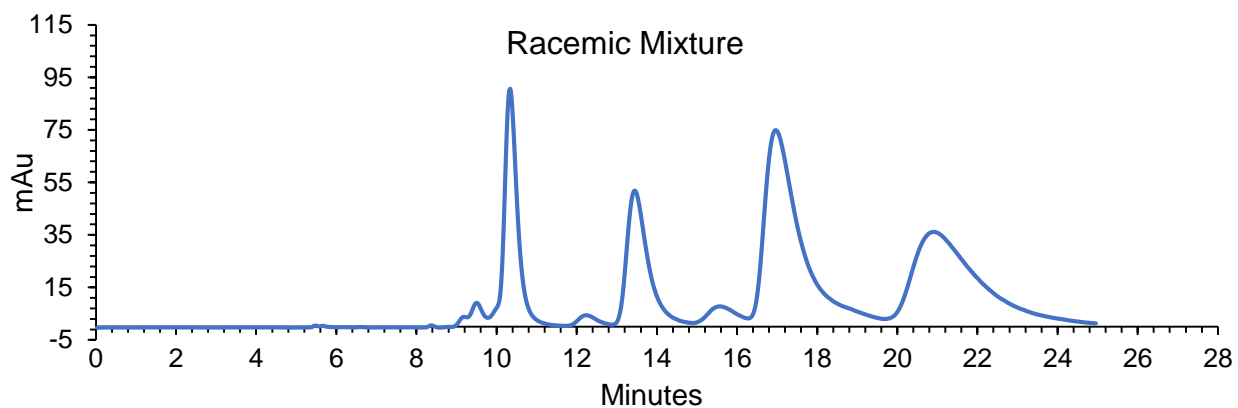

Signal 4: DAD1 D, Sig=254,2 Ref=550,100

| Ret. Time [min] | Area %  |
|-----------------|---------|
| 8.042           | 16.5155 |
| 11.155          | 14.5521 |
| 14.673          | 36.7462 |
| 18.615          | 32.1862 |

*tert*-Butyl ((*R*)-3-((*S*)-cyanofluoro(3-nitrophenyl)methyl)-2-oxo-1-tritylindolin-3-yl)carbamate  
(**3gb**)

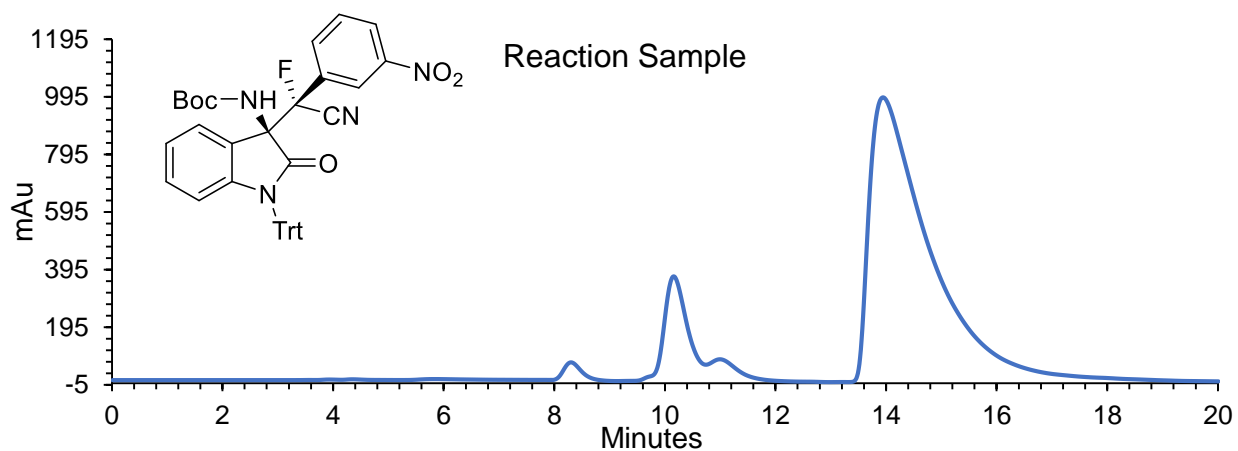

Signal 4: DAD1 D, Sig=254,2 Ref=550,100

| Ret. Time [min] | Area %  |
|-----------------|---------|
| 11.025          | 3.1150  |
| 14.017          | 96.8850 |

dr = 8.5:1, major ee = 94%

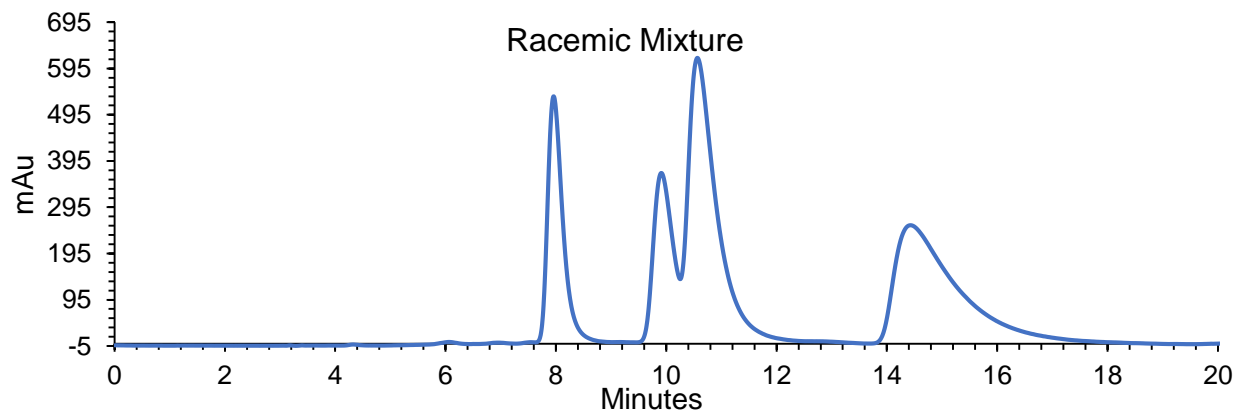

Signal 4: DAD1 D, Sig=254,2 Ref=550,100

| Ret. Time [min] | Area %  |
|-----------------|---------|
| 7.960           | 17.2714 |
| 9.912           | 14.6366 |
| 10.566          | 35.4541 |
| 14.428          | 32.6379 |

*tert*-Butyl ((*R*)-3-((*S*)-cyanofluoro(3-cyanophenyl)methyl)-2-oxo-1-tritylindolin-3-yl)carbamate  
(**3hb**)

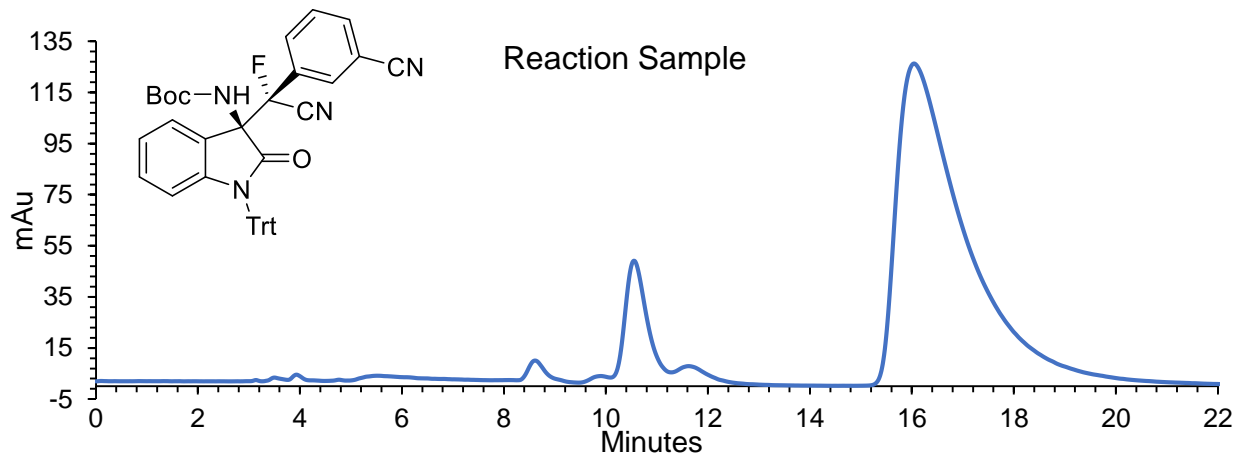

Signal 4: DAD1 D, Sig=254,2 Ref=550,100

| Ret. Time [min] | Area %  |
|-----------------|---------|
| 11.586          | 2.6551  |
| 16.117          | 97.3449 |

dr = 9.0:1, major ee = 95%

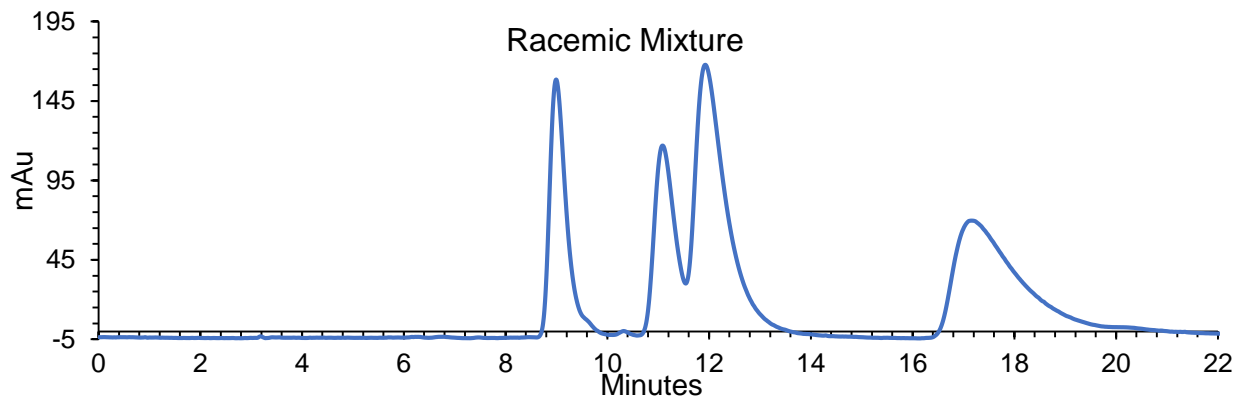

Signal 4: DAD1 D, Sig=254,2 Ref=550,100

| Ret. Time [min] | Area %  |
|-----------------|---------|
| 8.995           | 17.4883 |
| 11.088          | 15.7295 |
| 11.926          | 33.5708 |
| 17.163          | 33.2114 |



*tert*-Butyl ((*R*)-3-((*S*)-benzo[d][1,3]dioxol-5-yl(cyano)fluoromethyl)-2-oxo-1-tritylindolin-3-yl)carbamate (**3jb**)

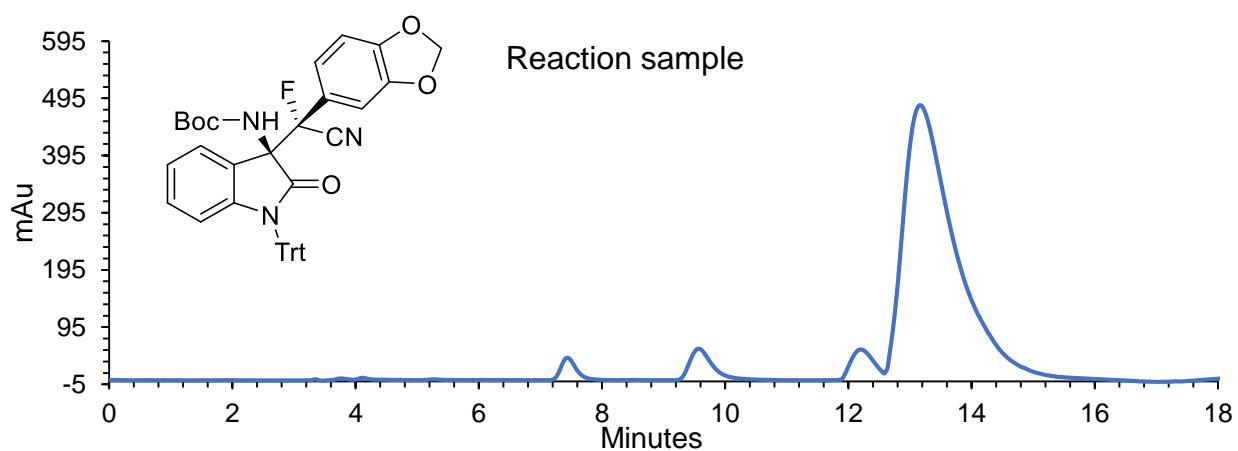

Signal 4: DAD1 D, Sig=254,2 Ref=550,100

| Ret. Time [min] | Area %  |
|-----------------|---------|
| 12.047          | 7.1268  |
| 13.195          | 92.8731 |

dr = 45.0:1, major ee = 86%

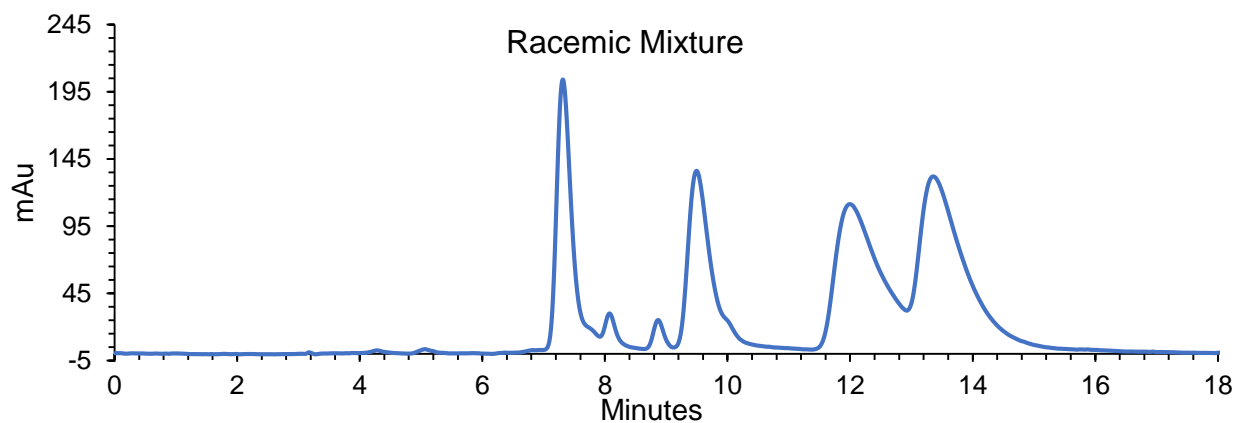

Signal 4: DAD1 D, Sig=254,2 Ref=550,100

| Ret. Time [min] | Area %  |
|-----------------|---------|
| 7.315           | 18.3953 |
| 9.496           | 18.8296 |
| 12.062          | 31.3979 |
| 13.422          | 31.7771 |



*tert*-Butyl ((*R*)-3-((*S*)-cyanofluoro(2-naphthyl)methyl)-2-oxo-1-tritylindolin-3-yl)carbamate

(3kb)

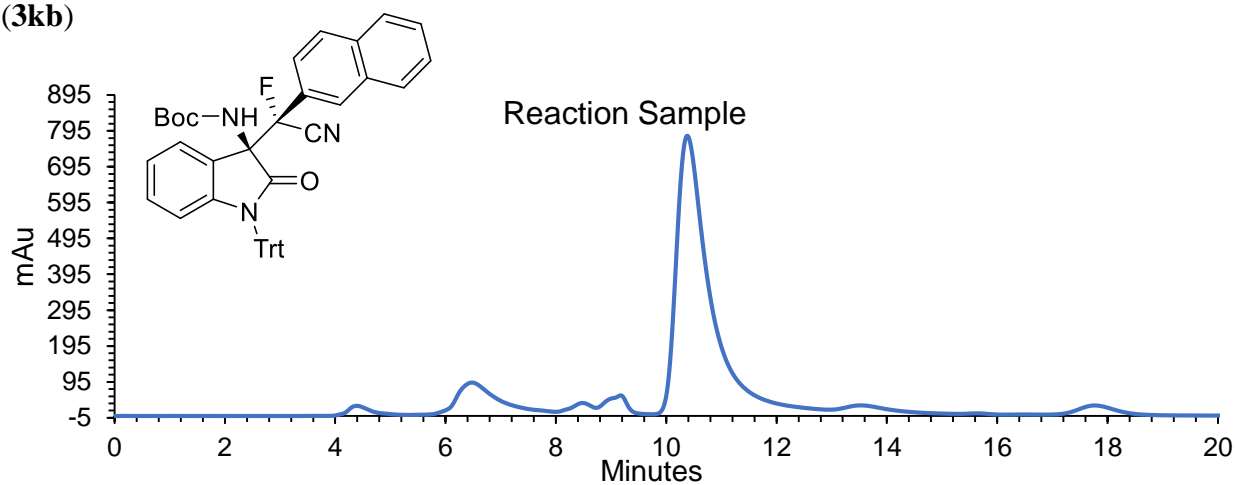

Signal 4: DAD1 D, Sig=254,2 Ref=550,100

| Ret. Time [min] | Area %  |
|-----------------|---------|
| 10.380          | 96.5062 |
| 17.774          | 3.4938  |

dr = 33.0:1, major ee = 93%

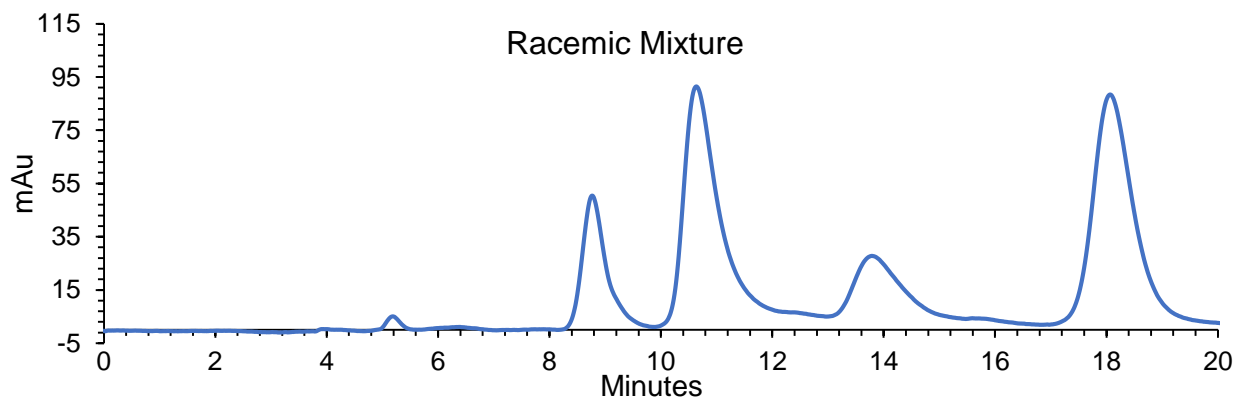

Signal 4: DAD1 D, Sig=254,2 Ref=550,100

| Ret. Time [min] | Area %  |
|-----------------|---------|
| 8.769           | 12.0778 |
| 10.639          | 37.2049 |
| 13.878          | 13.8520 |
| 18.066          | 36.8653 |

*tert*-Butyl ((*R*)-3-((*S*)-cyano(9H-fluoren-2-yl)fluoromethyl)-2-oxo-1-tritylindolin-3-yl)carbamate  
**(3b)**

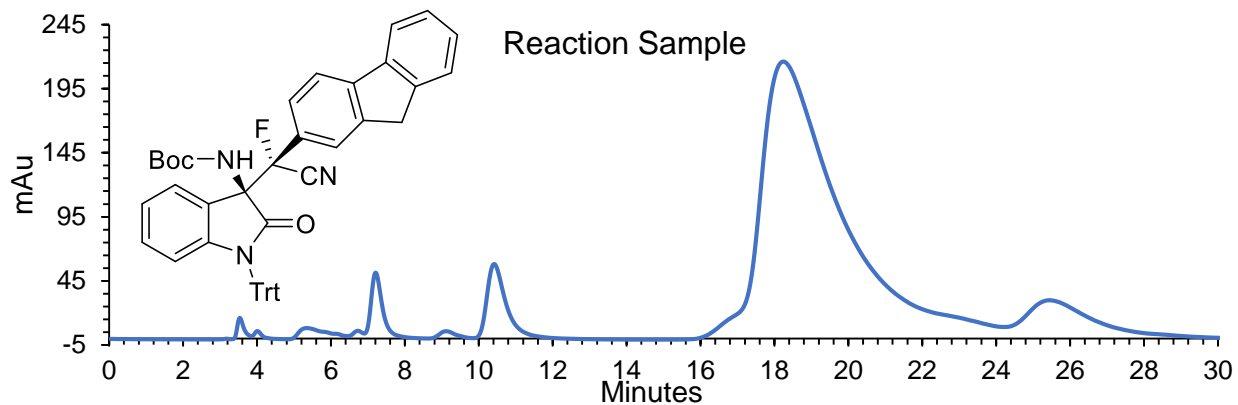

Signal 4: DAD1 D, Sig=254,2 Ref=550,100

| Ret. Time [min] | Area %  |
|-----------------|---------|
| 18.238          | 94.2969 |
| 25.440          | 5.7031  |

dr = 12.0:1, major ee = 88%

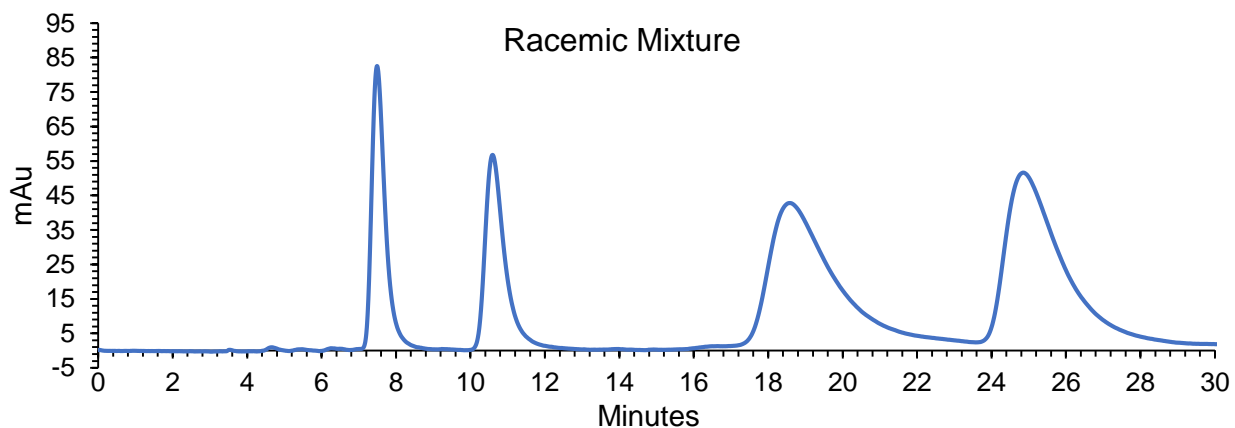

Signal 4: DAD1 D, Sig=254,2 Ref=550,100

| Ret. Time [min] | Area %  |
|-----------------|---------|
| 7.488           | 14.4763 |
| 10.591          | 14.1141 |
| 18.571          | 34.7723 |
| 24.851          | 36.6373 |

*tert*-Butyl ((*R*)-3-((*S*)-cyanofluoro(phenyl)methyl)-5-methyl-2-oxo-1-tritylindolin-3-yl)carbamate (**3ad**)

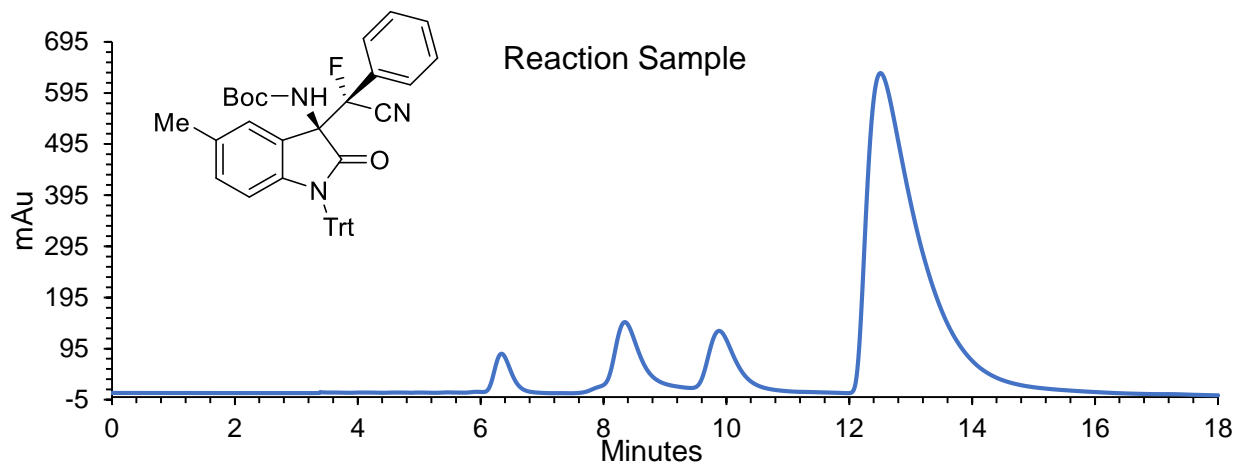

Signal 4: DAD1 D, Sig=254,2 Ref=550,100

| Ret. Time [min] | Area %  |
|-----------------|---------|
| 10.110          | 8.1233  |
| 12.657          | 91.8767 |

dr = 9.8:1, major ee = 84%

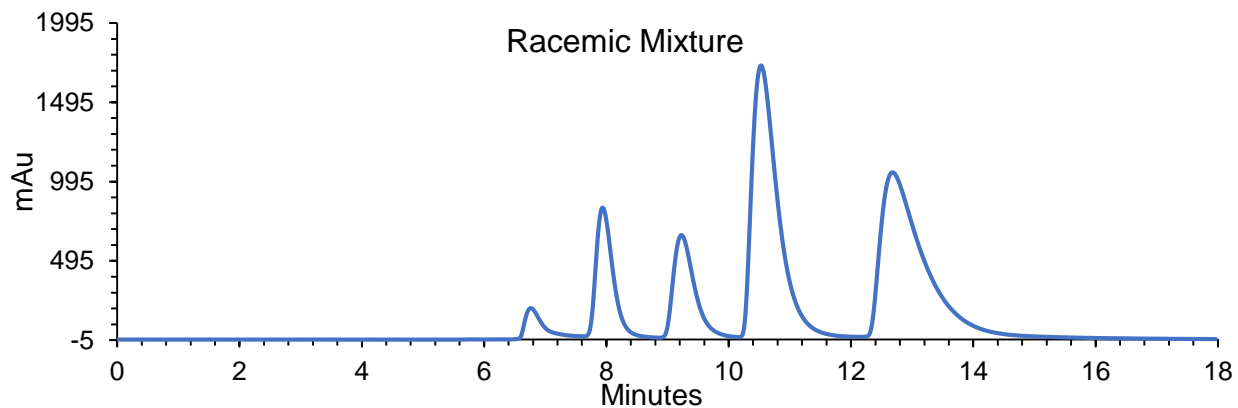

Signal 4: DAD1 D, Sig=254,2 Ref=550,100

| Ret. Time [min] | Area %  |
|-----------------|---------|
| 6.338           | 12.2721 |
| 8.487           | 11.7683 |
| 10.304          | 38.2352 |
| 12.810          | 37.7244 |

*tert*-Butyl ((*R*)-3-((*S*)-(3-bromophenyl)(cyano)fluoromethyl)-5-methyl-2-oxo-1-tritylindolin-3-yl)carbamate (**3cd**)

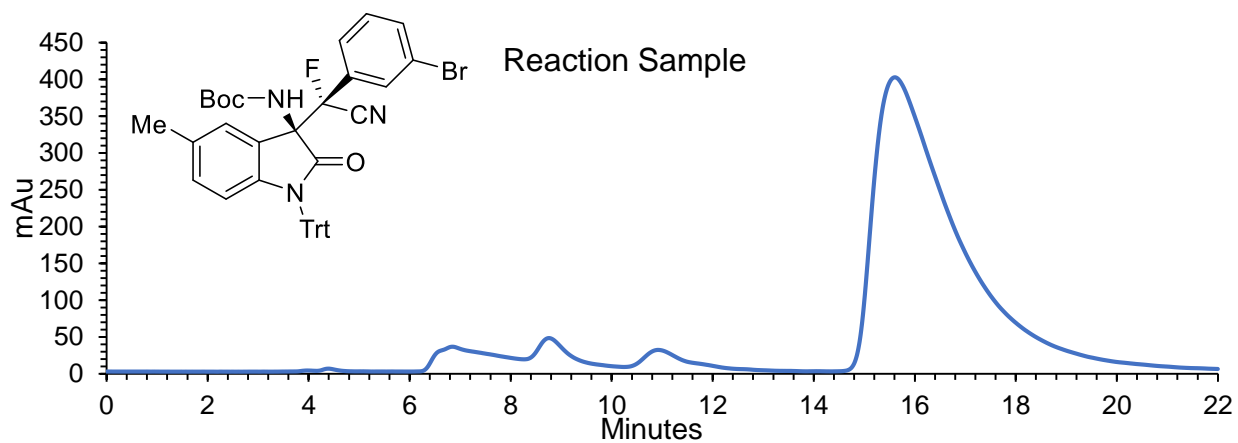

Signal 4: DAD1 D, Sig=254,2 Ref=550,100

| Ret. Time [min] | Area %  |
|-----------------|---------|
| 10.907          | 1.9519  |
| 15.607          | 98.0481 |

dr = 31.5:1, major ee = 96%

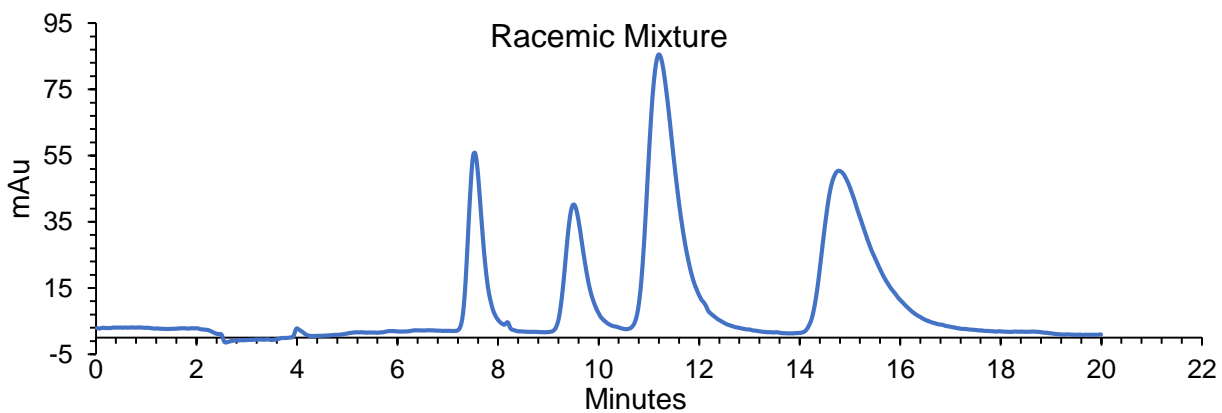

Signal 4: DAD1 D, Sig=254,2 Ref=550,100

| Ret. Time [min] | Area %  |
|-----------------|---------|
| 7.529           | 12.1279 |
| 9.502           | 12.2120 |
| 11.200          | 39.2398 |
| 14.778          | 36.4203 |

*tert*-Butyl ((*R*)-3-((*S*)-(3-chlorophenyl)(cyano)fluoromethyl)-5-ethyl-2-oxo-1-tritylindolin-3-yl)carbamate (**3be**)

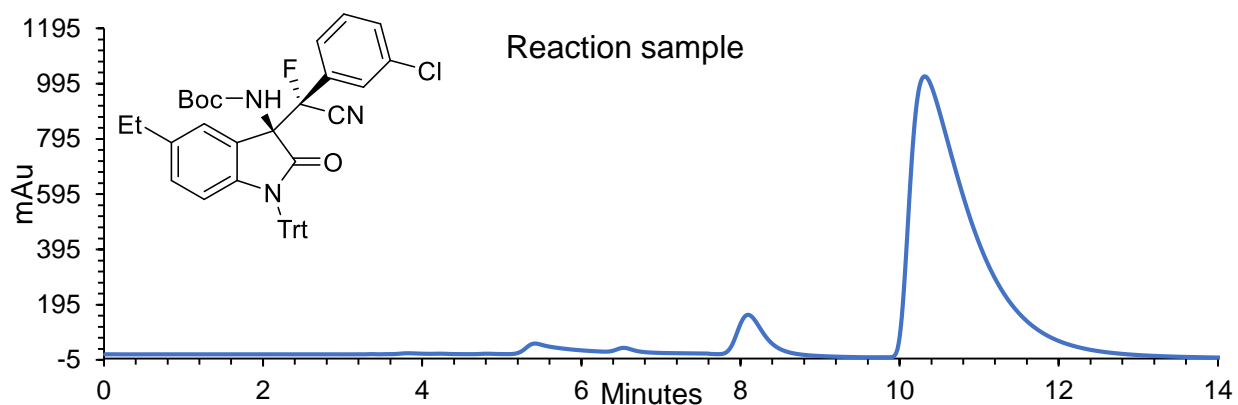

Signal 4: DAD1 D, Sig=254,2 Ref=550,100

| Ret. Time [min] | Area %  |
|-----------------|---------|
| 8.096           | 5.4445  |
| 10.316          | 94.5555 |

dr = 34.1:1, major ee = 89%

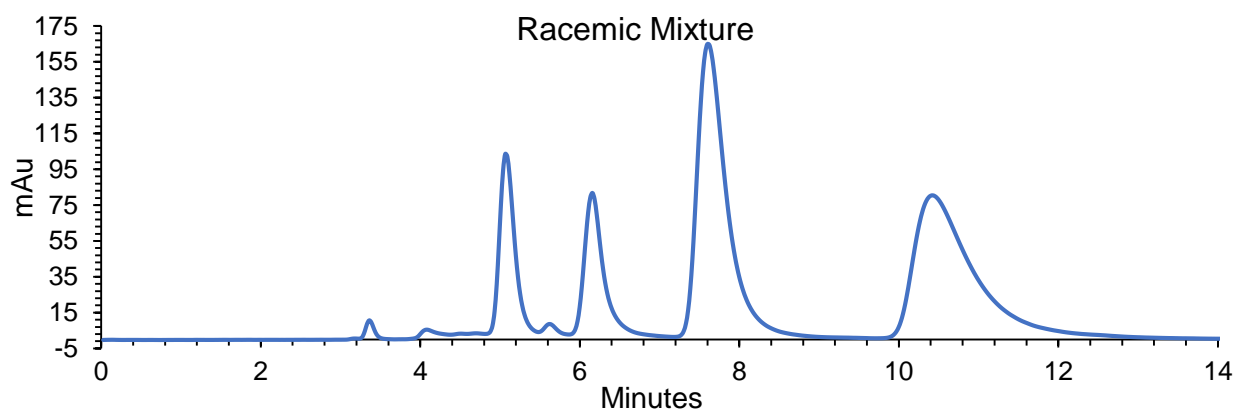

Signal 4: DAD1 D, Sig=254,2 Ref=550,100

| Ret. Time [min] | Area %  |
|-----------------|---------|
| 5.075           | 12.1505 |
| 6.157           | 12.0943 |
| 7.610           | 38.3502 |
| 10.422          | 37.4050 |

*tert*-Butyl ((*R*)-3-((*S*)-cyano fluoro(phenyl)methyl)-6-methoxy-2-oxo-1-tritylindolin-3-yl)carbamate (**3af**)

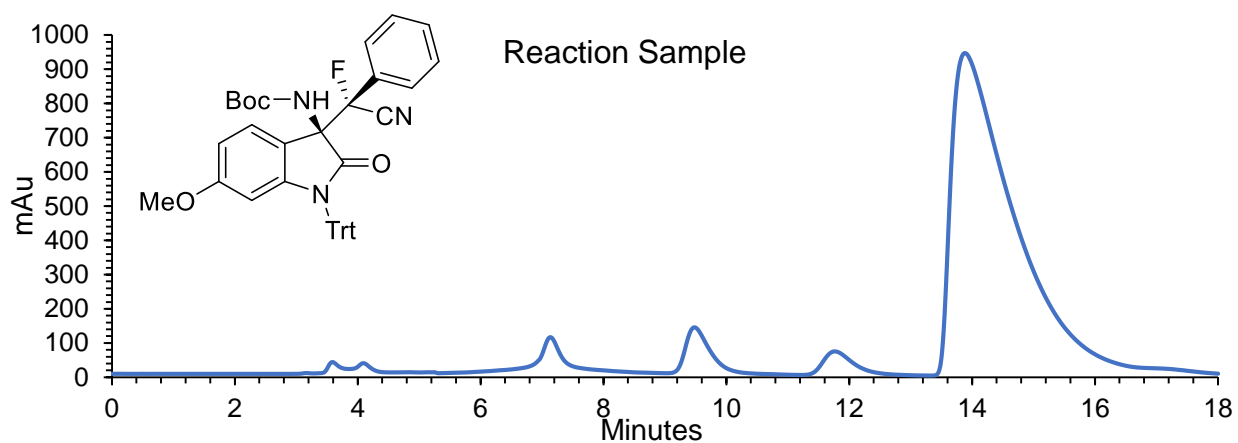

Signal 4: DAD1 D, Sig=254,2 Ref=550,100

| Ret. Time [min] | Area %  |
|-----------------|---------|
| 11.498          | 3.3118  |
| 14.031          | 96.6882 |

dr = 20.0:1, major ee = 93%

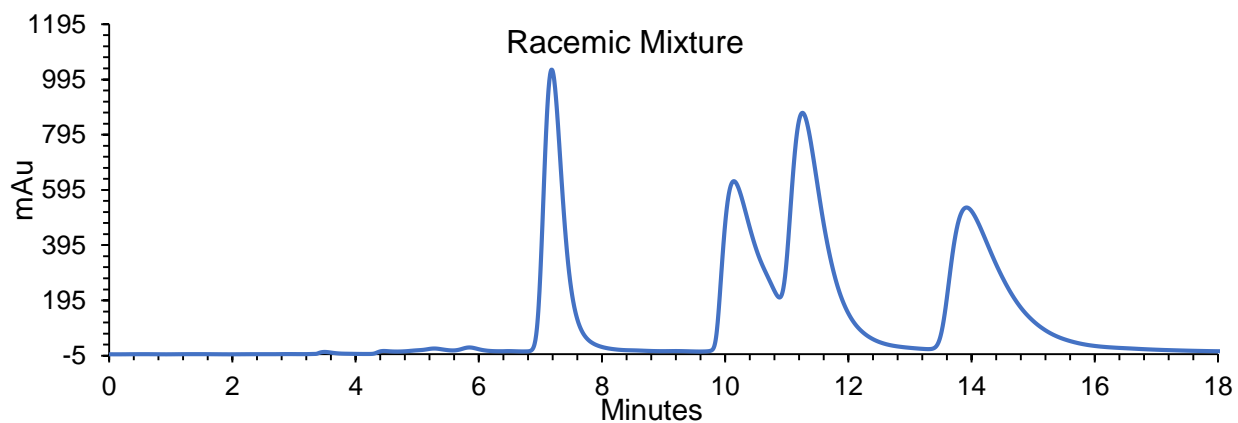

Signal 4: DAD1 D, Sig=254,2 Ref=550,100

| Ret. Time [min] | Area %  |
|-----------------|---------|
| 7.185           | 20.3286 |
| 10.143          | 21.0017 |
| 11.257          | 30.8672 |
| 13.921          | 27.8026 |

*tert*-Butyl ((*R*)-3-((*S*)-cyano fluoro(phenyl)methyl)-6-methyl-2-oxo-1-tritylindolin-3-yl)carbamate (**3ag**)

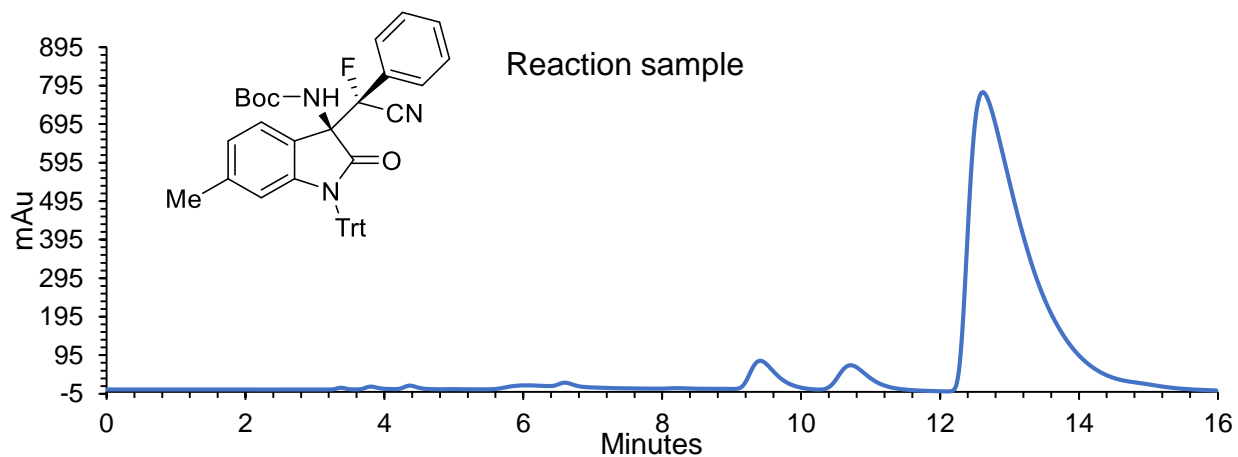

Signal 4: DAD1 D, Sig=254,2 Ref=550,100

| Ret. Time [min] | Area %  |
|-----------------|---------|
| 10.710          | 4.1180  |
| 12.615          | 95.8820 |

dr = 15.0:1, major ee = 92%

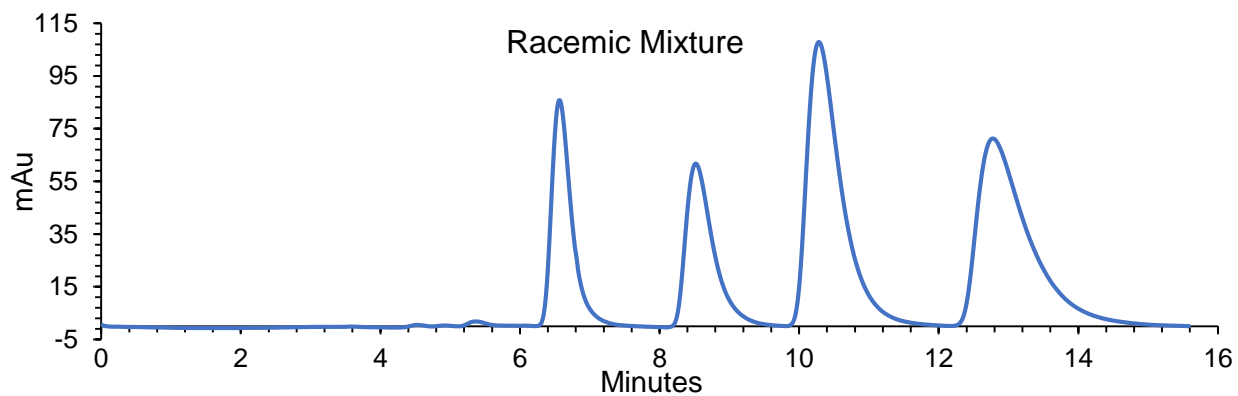

Signal 4: DAD1 D, Sig=254,2 Ref=550,100

| Ret. Time [min] | Area %  |
|-----------------|---------|
| 6.566           | 16.1542 |
| 8.519           | 16.0271 |
| 10.283          | 34.4789 |
| 12.776          | 33.3398 |

*tert*-Butyl ((*R*)-3-((*S*)-(3-chlorophenyl)(cyano)fluoromethyl)-5-methoxy-2-oxo-1-tritylindolin-3-yl)carbamate (**3bh**)

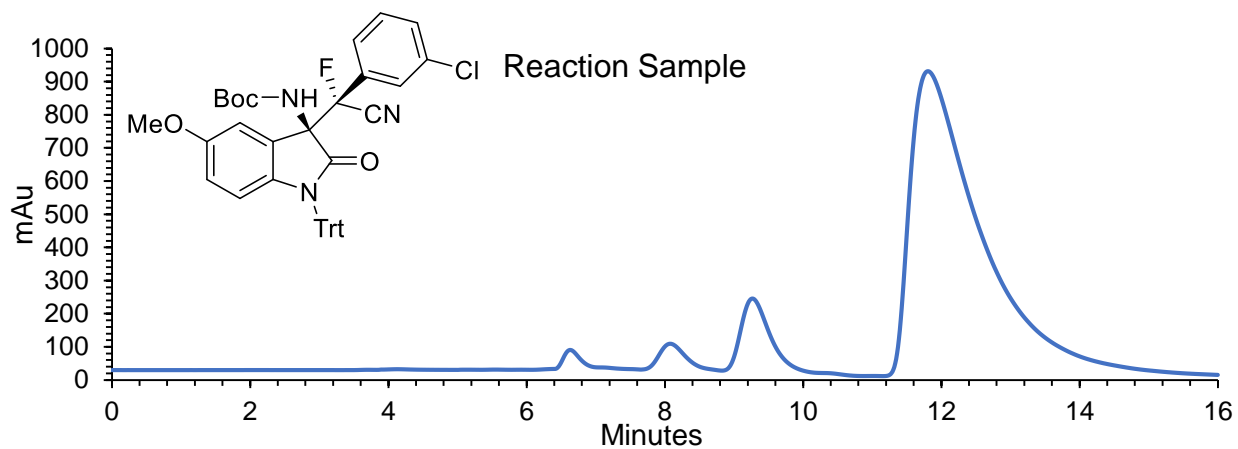

Signal 4: DAD1 D, Sig=254,2 Ref=550,100

| Ret. Time [min] | Area %  |
|-----------------|---------|
| 9.441           | 7.4428  |
| 11.948          | 92.5572 |

dr = 24.4:1, major ee = 85%

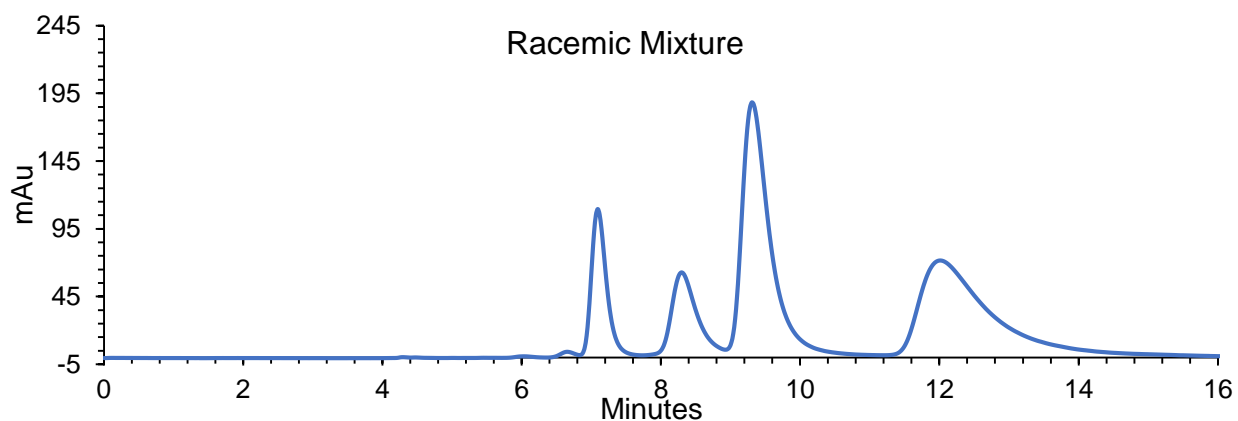

Signal 4: DAD1 D, Sig=254,2 Ref=550,100

| Ret. Time [min] | Area %  |
|-----------------|---------|
| 7.058           | 12.4289 |
| 8.216           | 12.4276 |
| 9.304           | 38.6803 |
| 12.017          | 36.4632 |



*tert*-Butyl ((*S*)-3-((*S*)-(cyanofluoro(phenyl)methyl)-2-oxo-1-phenylindolin-3-yl)carbamate (**3ac**)

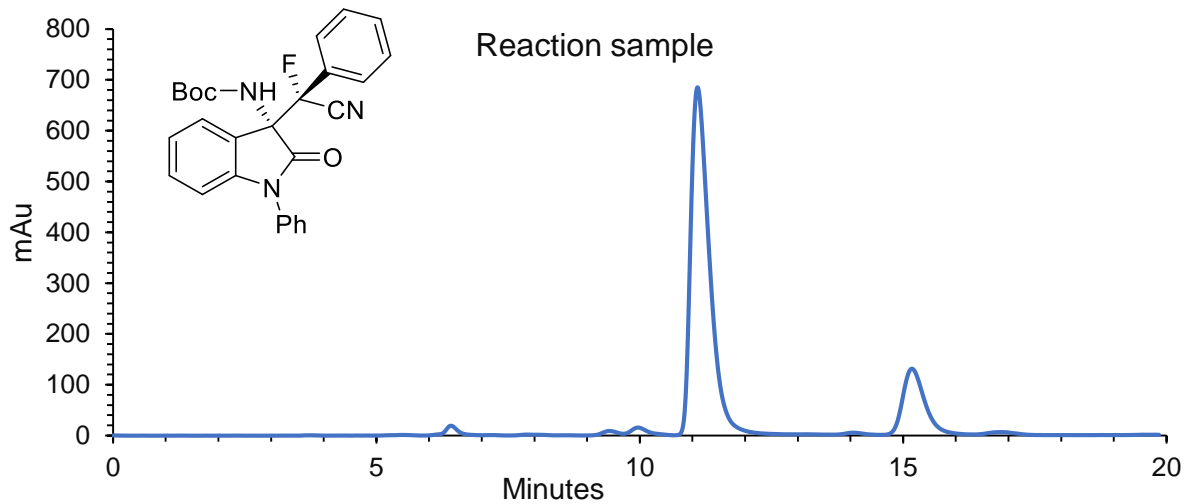

Signal 4: DAD1 D, Sig=254,2 Ref=550,100

| Ret. Time [min] | Area %  |
|-----------------|---------|
| 9.419           | 1.2693  |
| 11.093          | 98.7307 |

dr = 1:3.0, major ee = 97%

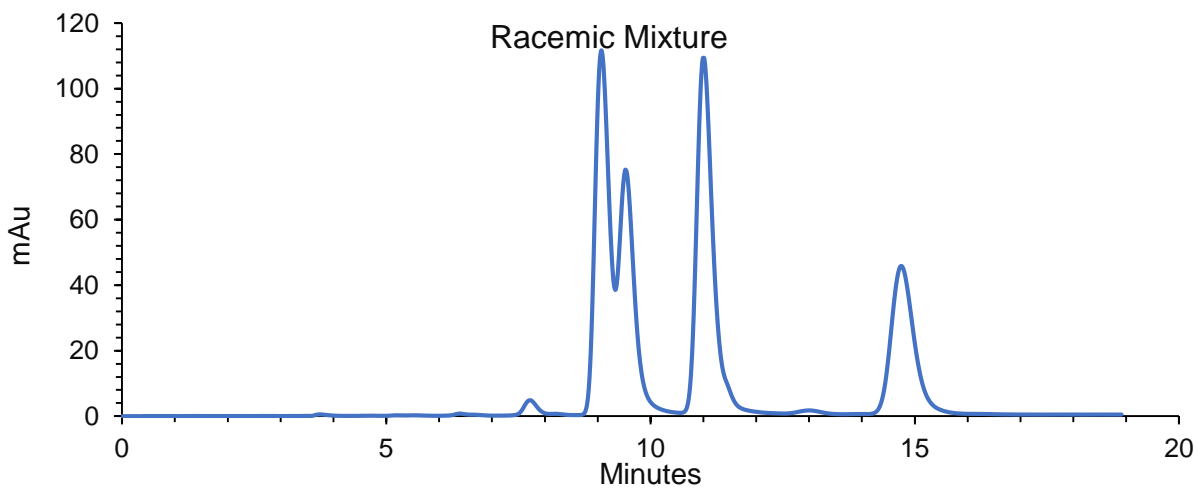

Signal 4: DAD1 D, Sig=254,2 Ref=550,100

| Ret. Time [min] | Area %  |
|-----------------|---------|
| 9.071           | 28.5179 |
| 9.530           | 21.2529 |
| 11.003          | 31.7566 |
| 14.744          | 18.4727 |

*tert*-Butyl ((*S*)-3-((*S*)-(cyanofluoro(3-chlorophenyl)methyl)-2-oxo-1-phenylindolin-3-yl) carbamate (**3bc**)

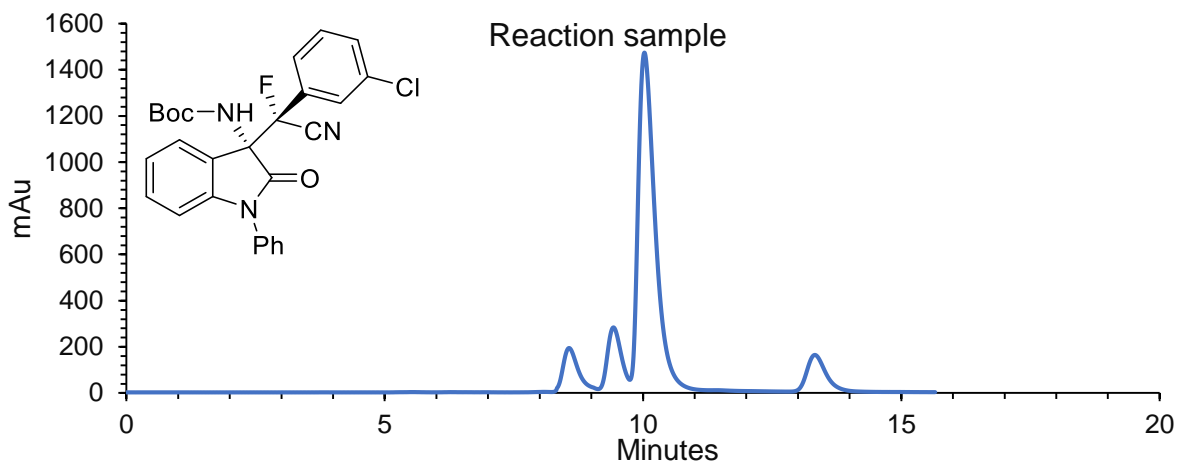

Signal 4: DAD1 D, Sig=254,2 Ref=550,100

| Ret. Time [min] | Area %  |
|-----------------|---------|
| 8.570           | 8.4763  |
| 10.029          | 91.5237 |

dr = 1:5.9, major ee = 83%

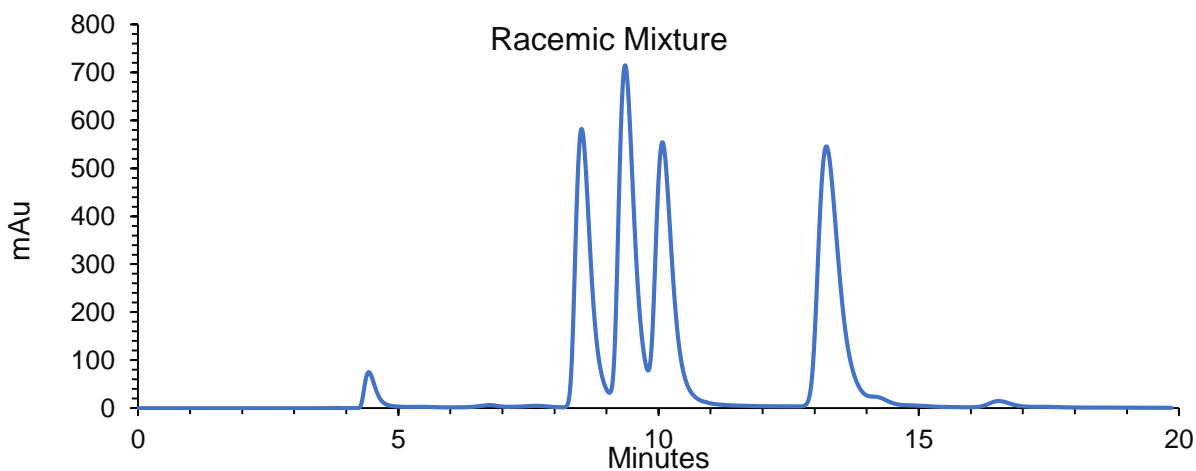

Signal 4: DAD1 D, Sig=254,2 Ref=550,100

| Ret. Time [min] | Area %  |
|-----------------|---------|
| 8.522           | 21.3029 |
| 9.357           | 28.0775 |
| 10.075          | 23.0336 |
| 13.225          | 27.5861 |

*tert*-Butyl ((*S*)-3-((*S*)-(cyanofluoro(3-methoxyphenyl)methyl)-2-oxo-1-phenylindolin-3-yl) carbamate (**3ec**)

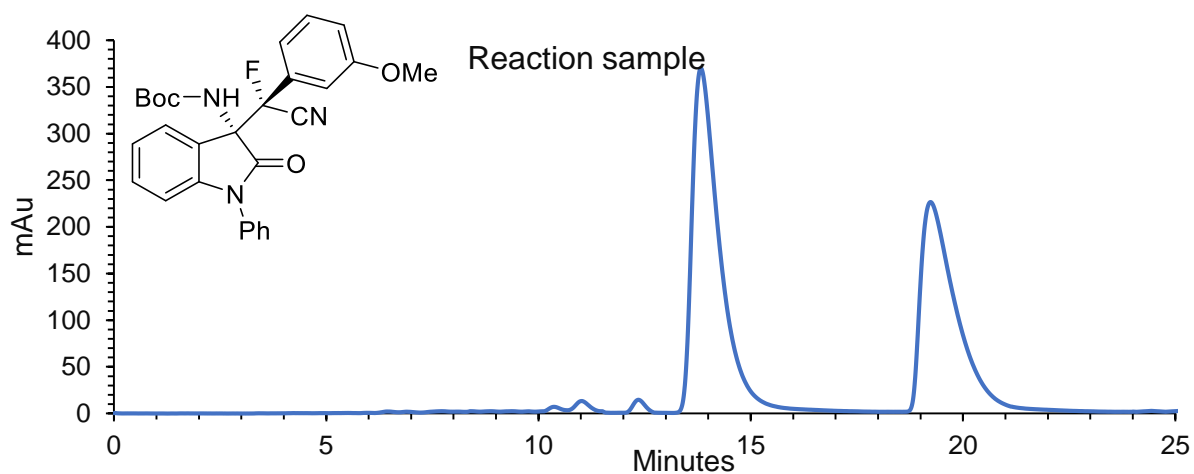

Signal 4: DAD1 D, Sig=254,2 Ref=550,100

| Ret. Time [min] | Area %  |
|-----------------|---------|
| 12.474          | 1.9638  |
| 13.827          | 98.0362 |

dr = 1:2.8, major ee = 96%

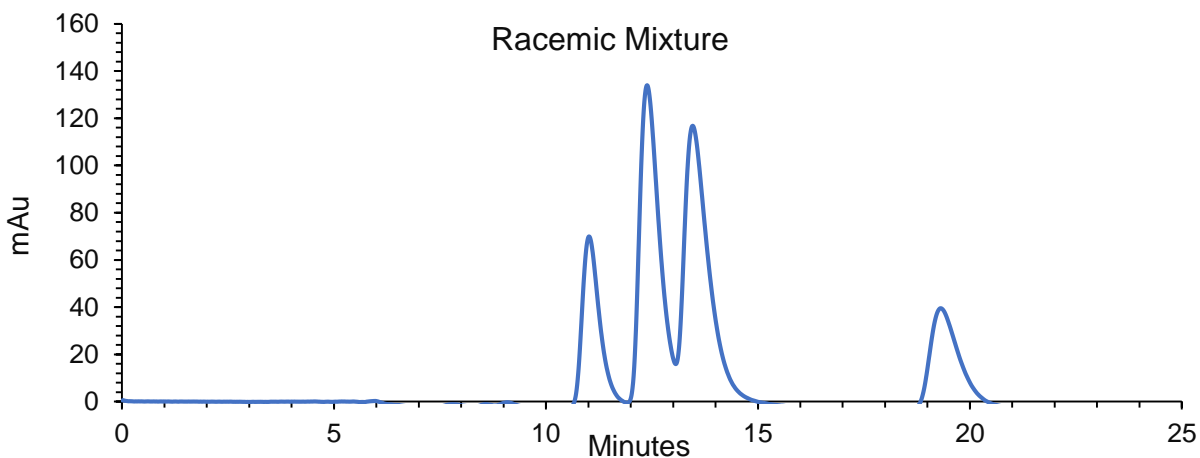

Signal 4: DAD1 D, Sig=254,2 Ref=550,100

| Ret. Time [min] | Area %  |
|-----------------|---------|
| 11.018          | 15.7267 |
| 12.387          | 33.2605 |
| 13.462          | 35.9257 |
| 19.313          | 15.0871 |

*tert*-Butyl ((*S*)-3-((*S*)-(cyanofluoro(3,5-dimethoxyphenyl)methyl)-2-oxo-1-phenylindolin-3-yl)carbamate (**3ic**)

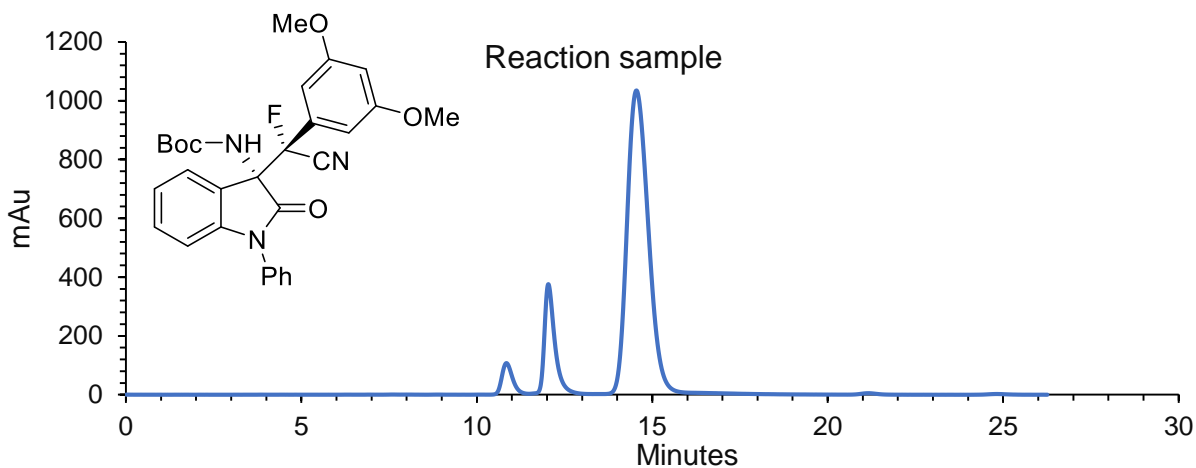

Signal 4: DAD1 D, Sig=254,2 Ref=550,100

| Ret. Time [min] | Area %  |
|-----------------|---------|
| 10.848          | 5.0399  |
| 14.552          | 94.9601 |

dr = 1:5.3, major ee = 90%

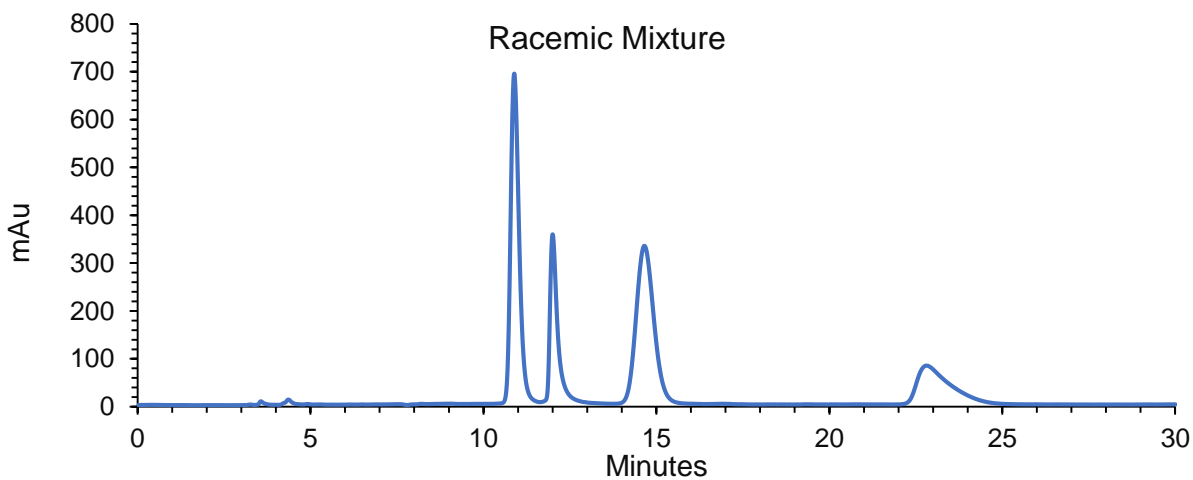

Signal 4: DAD1 D, Sig=254,2 Ref=550,100

| Ret. Time [min] | Area %  |
|-----------------|---------|
| 10.886          | 34.4593 |
| 11.998          | 15.4849 |
| 14.651          | 32.6387 |
| 22.811          | 17.4171 |

*tert*-Butyl ((*S*)-3-((*S*)-(cyanofluoro(2-naphthyl)methyl)-2-oxo-1-phenylindolin-3-yl)carbamate  
(**3kc**)

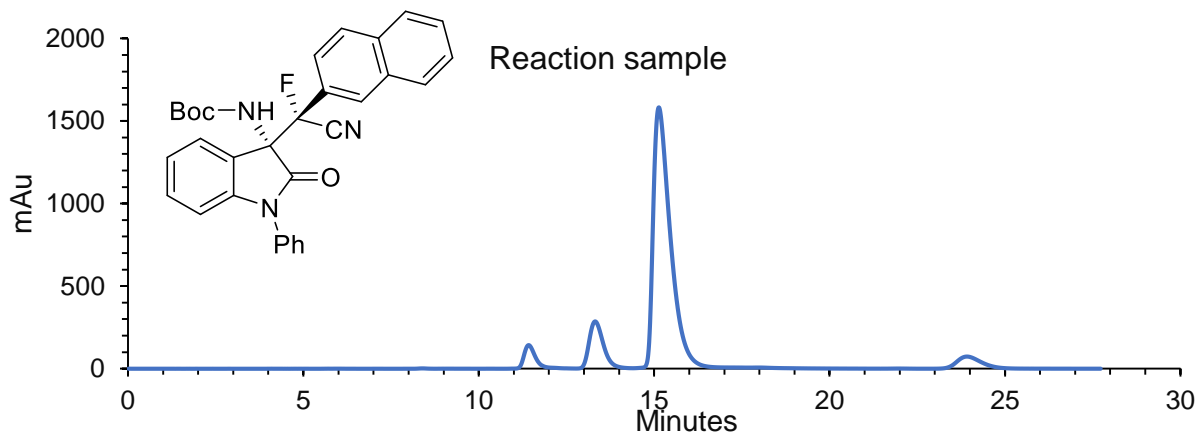

Signal 4: DAD1 D, Sig=254,2 Ref=550,100

| Ret. Time [min] | Area %  |
|-----------------|---------|
| 11.422          | 5.9705  |
| 15.133          | 94.0295 |

dr = 1:6.7, major ee = 88%

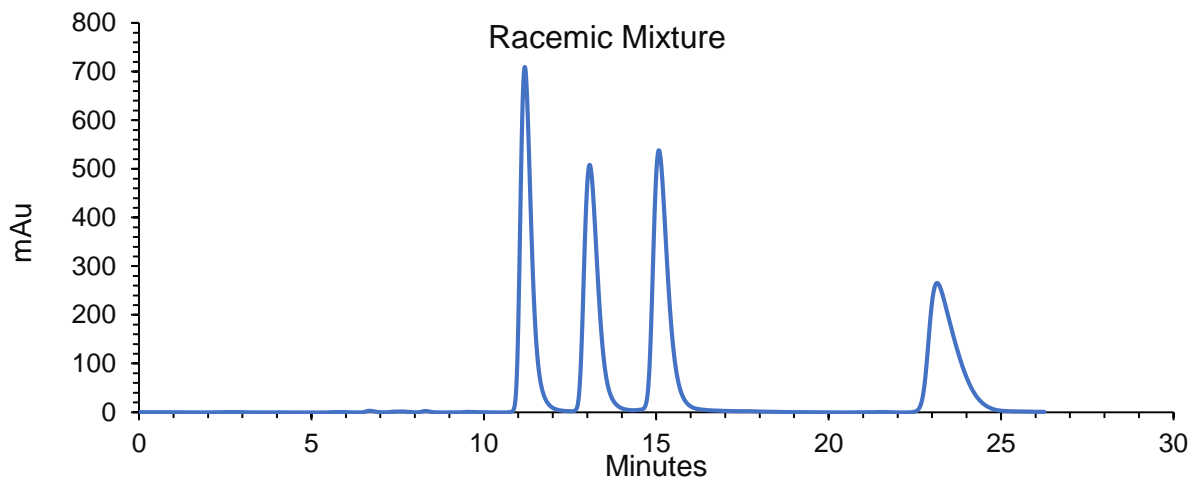

Signal 4: DAD1 D, Sig=254,2 Ref=550,100

| Ret. Time [min] | Area %  |
|-----------------|---------|
| 11.186          | 26.4770 |
| 13.067          | 23.6692 |
| 15.074          | 26.6387 |
| 23.142          | 23.4824 |

*tert*-Butyl ((*S*)-3-((*R*)-1-cyano-1-phenylethyl)-2-oxo-1-tritylindolin-3-yl)carbamate (**9**)

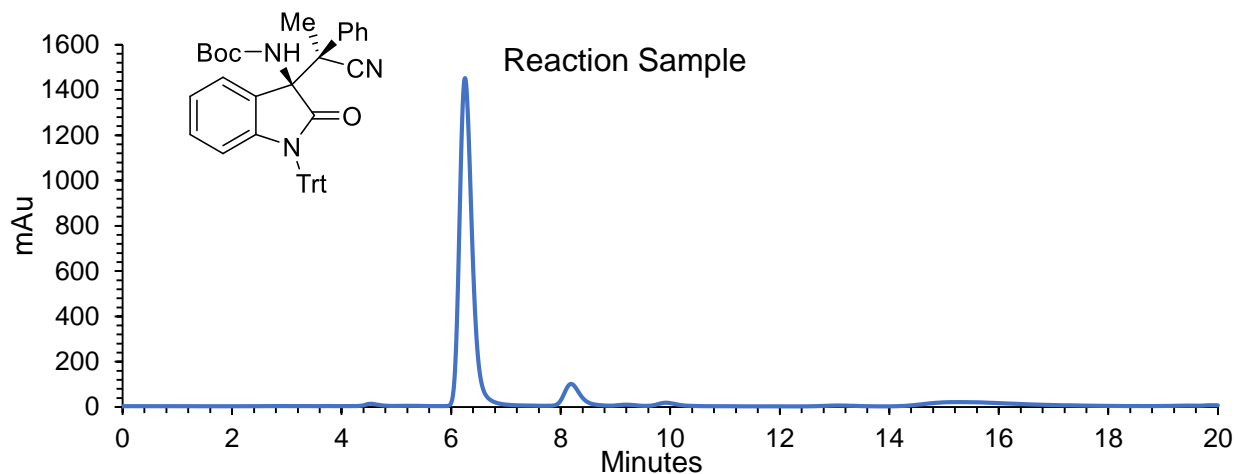

Signal 4: DAD1 D, Sig=254,2 Ref=550,100

| Ret. Time [min] | Area %  |
|-----------------|---------|
| 6.254           | 92.6403 |
| 8.187           | 7.3597  |

dr = >19:1, major ee = 85%

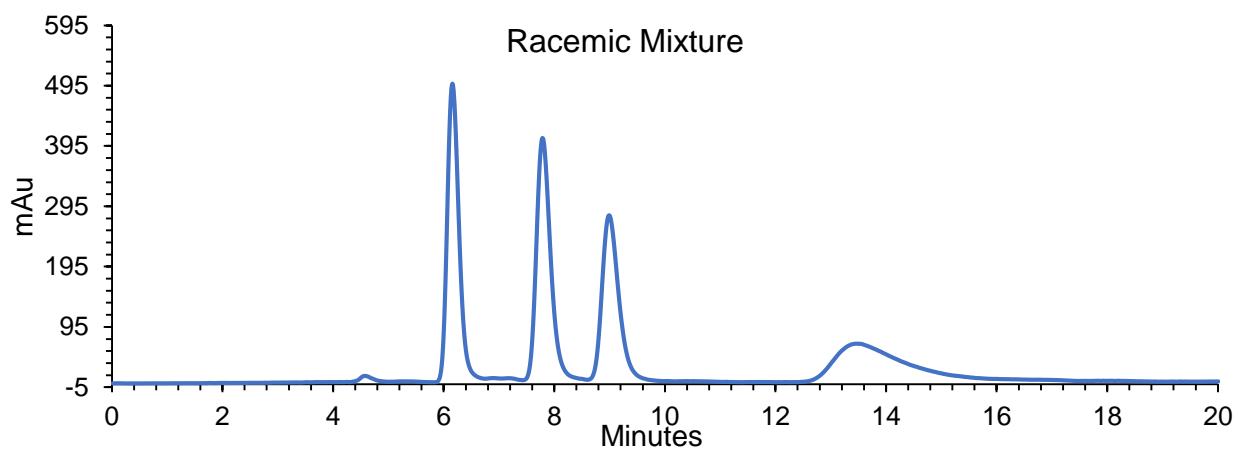

Signal 4: DAD1 D, Sig=254,2 Ref=550,100

| Ret. Time [min] | Area %  |
|-----------------|---------|
| 6.157           | 33.4102 |
| 7.784           | 32.6024 |
| 8.997           | 16.5718 |
| 13.464          | 17.4156 |

*tert*-Butyl ((*R*)-3-((*R*)-2-((*tert*-butoxycarbonyl)amino)-1-fluoro-1-phenylethyl)-2-oxo-1-tritylindolin-3-yl)carbamate (**4**)

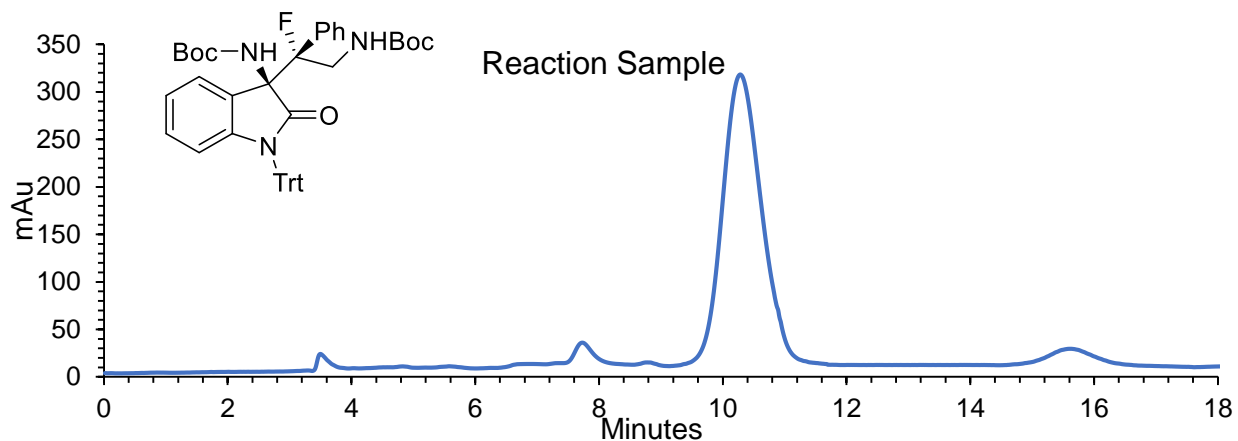

Signal 4: DAD1 D, Sig=245,2 Ref=550,100

| Ret. Time [min] | Area %  |
|-----------------|---------|
| 10.282          | 94.2216 |
| 15.615          | 5.7784  |

dr = 11.5:1, major ee = 88%

*tert*-Butyl ((*R*)-3-((*S*)-2-amino-1-fluoro-2-oxo-1-phenylethyl)-2-oxo-1-tritylindolin-3-yl)carbamate (**5**)

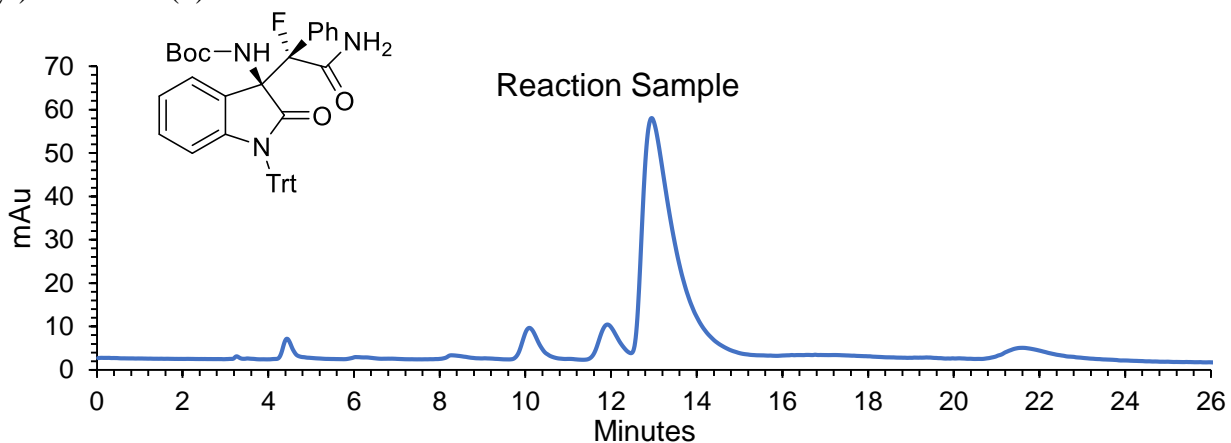

Signal 4: DAD1 D, Sig=245,2 Ref=550,100

| Ret. Time [min] | Area %  |
|-----------------|---------|
| 12.948          | 93.8947 |
| 21.601          | 6.1053  |

dr = 12.0:1, major ee = 88%

Methyl (2*R*,3*S*)-2-((*tert*-butoxycarbonyl)amino)-3-cyano-3-fluoro-3-phenyl-2-(2-(tritylamino)-phenyl)propanoate (**6**)

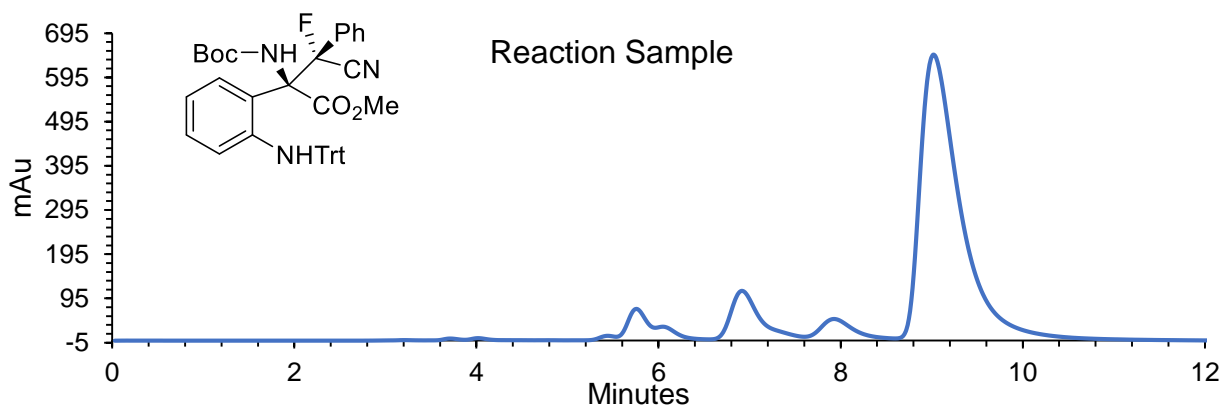

Signal 4: DAD1 D, Sig=245,2 Ref=550,100

| Ret. Time [min] | Area %  |
|-----------------|---------|
| 7.930           | 4.2144  |
| 9.023           | 95.7856 |

dr = 12.0:1, major ee = 91%

(*S*)-2-((*R*)-3-amino-2-oxoindolin-3-yl)-2-fluoro-2-phenylacetonitrile (**7**)

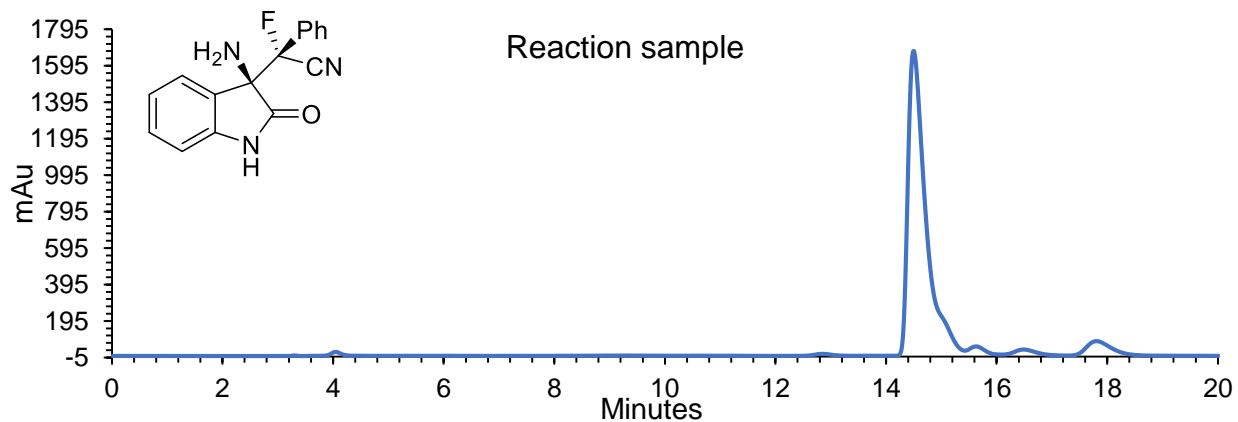

Signal 4: DAD1 D, Sig=254,2 Ref=550,100

| Ret. Time [min] | Area %  |
|-----------------|---------|
| 14.505          | 94.3396 |
| 17.798          | 5.6604  |

dr = 12.0:1, major ee = 89%



## 7. Crystallographic Data

*tert*-Butyl ((*R*)-3-((*S*)-cyanofluoro(phenyl)methyl)-2-oxo-1-tritylindolin-3-yl)carbamate **3ab**

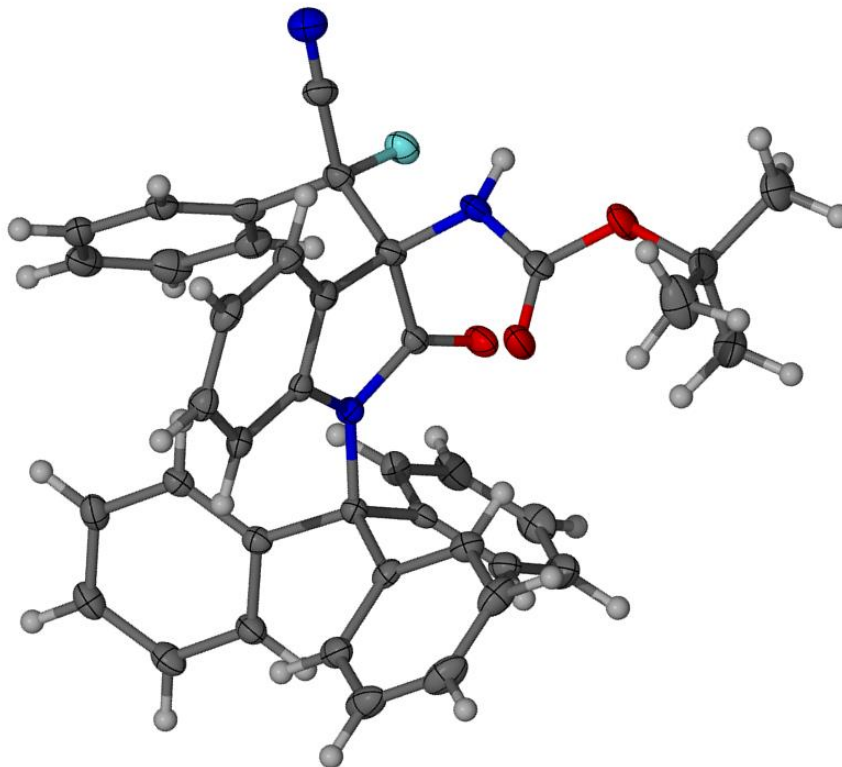

A single crystal was obtained by slow evaporation of a solution of **3ab** in ethanol. Single crystal X-ray analysis was performed at 100 K using a Siemens platform diffractometer with graphite monochromated Mo-K $\alpha$  radiation ( $\lambda = 0.71073$  Å). Data were integrated and corrected using the APEX 3 program. The structures were solved by direct methods and refined with full-matrix least-square analysis using SHELX-97-2 software. Non-hydrogen atoms were refined with anisotropic displacement parameter. Crystal data: C<sub>40</sub>H<sub>34</sub>FN<sub>3</sub>O<sub>3</sub>, C<sub>2</sub>H<sub>6</sub>O,  $M = 669.77$ , colorless prism, 0.282 x 0.213 x 0.089 mm<sup>3</sup>, monoclinic, space group  $P2_1$ ,  $a = 9.9121(4)$ ,  $b = 39.1264(17)$ ,  $c = 9.9531(5)$  Å,  $V = 3525.4(3)$  Å<sup>3</sup>,  $Z = 4$ . Absolute structure parameter = -0.01(5).<sup>3</sup>

*tert*-Butyl ((*R*)-3-((*S*)-cyano(9H-fluoren-2-yl)fluoromethyl)-2-oxo-1-tritylindolin-3-yl)carbamate  
**3lb**

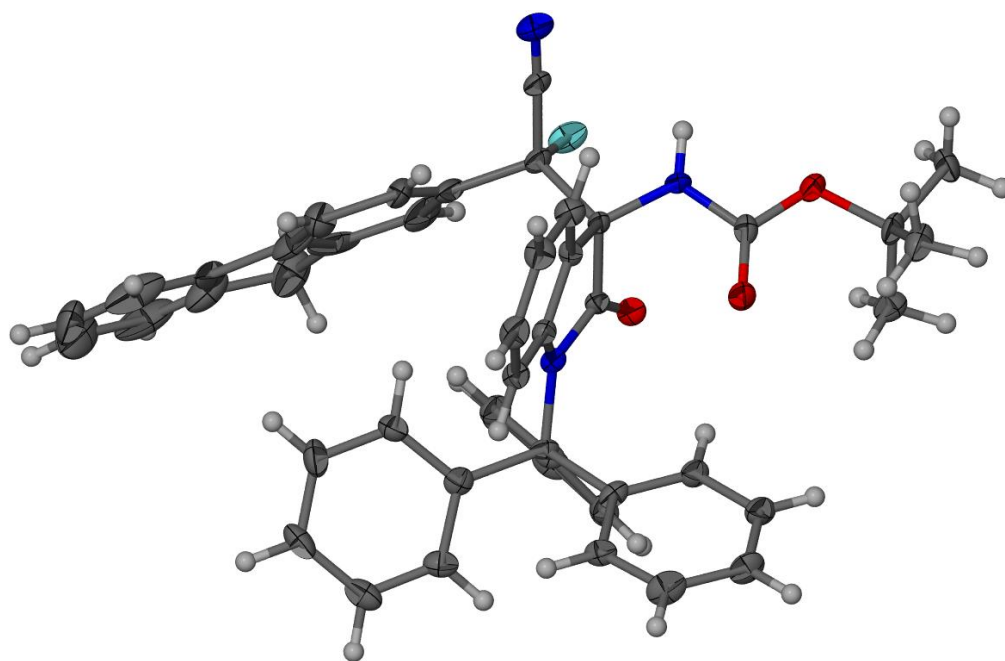

A single crystal was obtained by slow evaporation of a solution of **3lb** in hexanes/ethyl ether/dichloromethane (2:2:1). Single crystal X-ray analysis was performed at 100 K using a Siemens platform diffractometer with graphite monochromated Mo-K $\alpha$  radiation ( $\lambda = 0.71073$  Å). Data were integrated and corrected using the APEX 3 program. The structures were solved by direct methods and refined with full-matrix least-square analysis using SHELX-97-2 software. Non-hydrogen atoms were refined with anisotropic displacement parameter. Crystal data: C<sub>47</sub>H<sub>38</sub>FN<sub>3</sub>O<sub>3</sub>, CH<sub>2</sub>Cl<sub>2</sub>,  $M = 796.73$ , colorless prism, 0.444 x 0.408 x 0.153 mm<sup>3</sup>, orthorhombic, space group  $P2_12_12_1$ ,  $a = 9.0002(7)$ ,  $b = 20.7380(17)$ ,  $c = 21.1515(17)$  Å,  $V = 3947.9(5)$  Å<sup>3</sup>,  $Z = 4$ . Absolute structure parameter = 0.04(3).<sup>3</sup>

*syn-tert*-Butyl (3-(cyanofluoro(3-chlorophenyl)methyl)-2-oxo-1-phenylindolin-3-yl)carbamate  
**(3bc)**

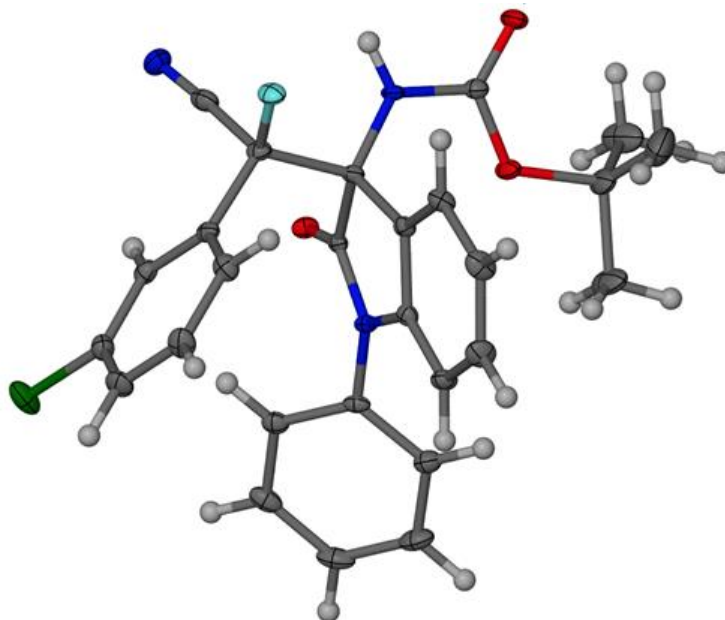

A single crystal was obtained by slow evaporation of a solution of **3bc** in hexanes/ethanol/chloroform (3:1:1). Single crystal X-ray analysis was performed at 100 K using a Siemens platform diffractometer with graphite monochromated Mo-K $\alpha$  radiation ( $\lambda = 0.71073 \text{ \AA}$ ). Data were integrated and corrected using the APEX 3 program. The structures were solved by direct methods and refined with full-matrix least-square analysis using SHELX-97-2 software. Non-hydrogen atoms were refined with anisotropic displacement parameter. Crystal data: C<sub>27</sub>H<sub>23</sub>ClFN<sub>3</sub>O<sub>3</sub>,  $M = 491.93$ , colorless prism, 0.35 x 0.12 x 0.04 mm<sup>3</sup>, monoclinic, space group  $P2_1/c$   $a = 15.1949(7)$ ,  $b = 8.5818(4)$ ,  $c = 20.7071(10) \text{ \AA}$ ,  $V = 2515.5(2) \text{ \AA}^3$ ,  $Z = 4$ .

*tert*-Butyl ((*S*)-3-((*S*)-cyanofluoro(3,5-dimethoxyphenyl)methyl)-2-oxo-1-phenylindolin-3-yl)carbamate (**3ic**)

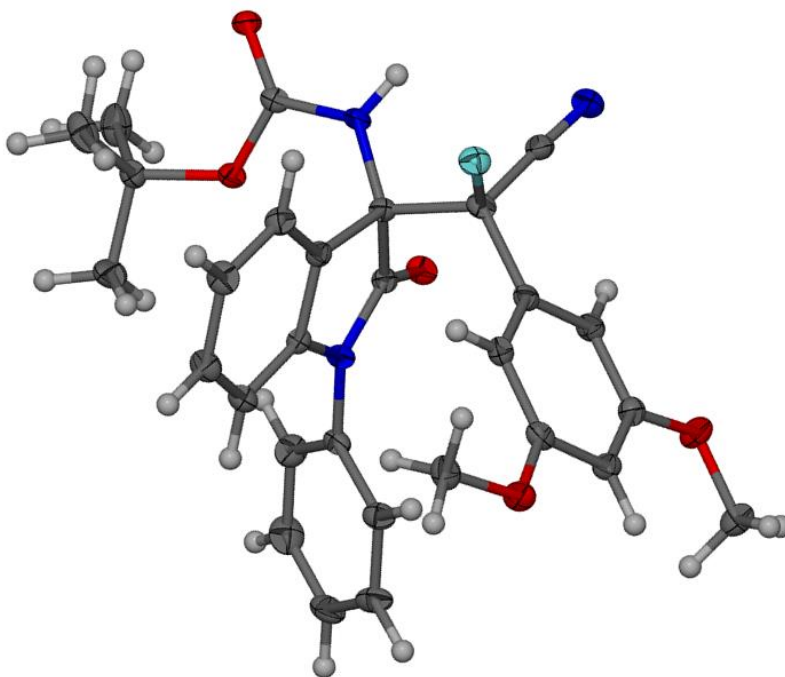

A single crystal was obtained by layering of a solution of **3ic** with hexanes / ethanol / chloroform (3:1:1). Single crystal X-ray analysis was performed at 100 K using a Siemens platform diffractometer with graphite monochromated Mo-K $\alpha$  radiation ( $\lambda = 0.71073 \text{ \AA}$ ). Data were integrated and corrected using the APEX 3 program. The structures were solved by direct methods and refined with full-matrix least-square analysis using SHELX-97-2 software. Non-hydrogen atoms were refined with anisotropic displacement parameter. Crystal data: C<sub>29</sub>H<sub>28</sub>FN<sub>3</sub>O<sub>5</sub>,  $M = 517.54$ , colorless plate, 0.41 x 0.27 x 0.08 mm<sup>3</sup>, monoclinic, space group  $P2_1$ ,  $a = 8.9884(5)$ ,  $b = 20.0594(11)$ ,  $c = 14.4200(8)$ ,  $V = 2600.0(2) \text{ \AA}^3$ ,  $Z = 4$ . Absolute structure parameter = 0.058(151).<sup>4</sup>

## 8. References

---

- 1 a) LeTourneau, M. E.; McCarthy, J. R., A Novel Synthesis of  $\alpha$ -Fluoroacetonitriles. Application to A Convenient Preparation of 2-Fluoro-2-phenethylamines. *Tetrahedron Lett.* **1984**, *46*, 5227-5230. b) Venkatachalam, T. K.; Uckun, F. M., Synthesis of  $\beta$ -Fluorophenethyl Halopyridyl Thiourea Compounds as Non-nucleoside Inhibitors of HIV-1 Reverse Transcriptase. *Synth. Commun.* **2004**, *13*, 2463-2472.
- 2 Nakamura, S.; Hyodo, K.; Nakamura, M.; Nakane, D.; Masuda, H., Catalytic Enantioselective Allylation of Ketimines by Using Palladium Pincer Complexes with Chiral Bis(imidazoline)s. *Chem. Eur. J.* **2013**, *19*, 7304-7309.
- 3 Flack, H. D., On Enantiomorph-polarity Estimation. *Acta Cryst.* **1983**, *A39*, 876-881.
- 4 Parsons, S.; Flack, H. D.; Wagner, T., Use of Intensity Quotients and Differences in Absolute Structure Refinement. *Acta Cryst.* **2013**, *B69*, 249-259.
